# Supplementary material for: Specific expression of lactate dehydrogenases in glioblastoma controls intercellular lactate transfer to promote tumor growth and invasion
Source: Research Square preprint supplement (doi:10.21203/rs.3.rs-690811/v1), 2021-07-09
Supplement: Supplementary file 7 [file e37ddd35cd8aa06da7031127.xlsx]

## Sheet: Cont-LDHA_Normo
ensembl_gene_id_version	entrezgene_id	description	external_gene_name	baseMean	log2FoldChange	lfcSE	stat	pvalue	padj
ENSG00000151632,17	1646	aldo-keto reductase family 1 member C2 [Source:HGNC Symbol;Acc:HGNC:385]	AKR1C2	204.742	4.03587	0.0996899	40.4843	0	0
ENSG00000187134,14	1645	aldo-keto reductase family 1 member C1 [Source:HGNC Symbol;Acc:HGNC:384]	AKR1C1	443.428	2.94407	0.0695958	42.3025	0	0
ENSG00000134333,14	3939	lactate dehydrogenase A [Source:HGNC Symbol;Acc:HGNC:6535]	LDHA	3771.33	2.28488	0.0642636	35.5549	6.98462e-277	4.59402e-273
ENSG00000146674,15	3486	insulin like growth factor binding protein 3 [Source:HGNC Symbol;Acc:HGNC:5472]	IGFBP3	3529.12	-1.79813	0.0716816	-25.085	7.25537e-139	3.57908e-135
ENSG00000074410,14	771	carbonic anhydrase 12 [Source:HGNC Symbol;Acc:HGNC:1371]	CA12	2378.07	-0.987337	0.0412441	-23.9389	1.20617e-126	4.76002e-123
ENSG00000089169,15	22895	rabphilin 3A [Source:HGNC Symbol;Acc:HGNC:17056]	RPH3A	1305.98	-1.10579	0.0480338	-23.021	2.87243e-117	9.44645e-114
ENSG00000118257,16	8828	neuropilin 2 [Source:HGNC Symbol;Acc:HGNC:8005]	NRP2	1244.96	-0.954294	0.0433639	-22.0066	2.48872e-107	7.01535e-104
ENSG00000101638,13	29906	ST8 alpha-N-acetyl-neuraminide alpha-2,8-sialyltransferase 5 [Source:HGNC Symbol;Acc:HGNC:17827]	ST8SIA5	4571.45	-0.705783	0.0323749	-21.8003	2.30527e-105	5.68596e-102
ENSG00000041982,16	3371	tenascin C [Source:HGNC Symbol;Acc:HGNC:5318]	TNC	1528.86	-0.963642	0.0464318	-20.754	1.12911e-95	2.47551e-92
ENSG00000079308,19	7145	tensin 1 [Source:HGNC Symbol;Acc:HGNC:11973]	TNS1	216.542	-1.53757	0.0750653	-20.4831	3.04353e-93	6.00549e-90
ENSG00000144824,21	90102	pleckstrin homology like domain family B member 2 [Source:HGNC Symbol;Acc:HGNC:29573]	PHLDB2	119.809	1.72643	0.0853794	20.2207	6.43215e-91	1.15381e-87
ENSG00000242265,5	23089	paternally expressed 10 [Source:HGNC Symbol;Acc:HGNC:14005]	PEG10	1656.08	0.794146	0.0405336	19.5923	1.79929e-85	2.95864e-82
ENSG00000167306,20	4645	myosin VB [Source:HGNC Symbol;Acc:HGNC:7603]	MYO5B	739.367	-0.923697	0.0476456	-19.3868	9.97319e-84	1.51378e-80
ENSG00000155511,18	2890	glutamate ionotropic receptor AMPA type subunit 1 [Source:HGNC Symbol;Acc:HGNC:4571]	GRIA1	168.46	-3.2661	0.169663	-19.2505	1.39889e-82	1.97163e-79
ENSG00000095303,17	5742	prostaglandin-endoperoxide synthase 1 [Source:HGNC Symbol;Acc:HGNC:9604]	PTGS1	1012.91	-1.04309	0.0542165	-19.2393	1.73539e-82	2.28284e-79
ENSG00000177511,6	51046	ST8 alpha-N-acetyl-neuraminide alpha-2,8-sialyltransferase 3 [Source:HGNC Symbol;Acc:HGNC:14269]	ST8SIA3	400.764	-1.44388	0.0752597	-19.1853	4.90908e-82	6.05413e-79
ENSG00000177675,8	283316	CD163 molecule like 1 [Source:HGNC Symbol;Acc:HGNC:30375]	CD163L1	85.1175	1.84013	0.100411	18.326	5.13429e-75	5.9594e-72
ENSG00000074527,12	59277	netrin 4 [Source:HGNC Symbol;Acc:HGNC:13658]	NTN4	69.1654	2.17895	0.119306	18.2635	1.61656e-74	1.77211e-71
ENSG00000233705,7	NA	SLC26A4 antisense RNA 1 [Source:HGNC Symbol;Acc:HGNC:22385]	SLC26A4-AS1	48.0228	2.70338	0.149317	18.1049	2.91444e-73	3.02672e-70
ENSG00000150938,10	51232	cysteine rich transmembrane BMP regulator 1 [Source:HGNC Symbol;Acc:HGNC:2359]	CRIM1	1734.17	-0.729245	0.0403332	-18.0805	4.53874e-73	4.47792e-70
ENSG00000100234,11	7078	TIMP metallopeptidase inhibitor 3 [Source:HGNC Symbol;Acc:HGNC:11822]	TIMP3	115.33	1.92955	0.10709	18.018	1.40796e-72	1.32295e-69
ENSG00000172020,12	2596	growth associated protein 43 [Source:HGNC Symbol;Acc:HGNC:4140]	GAP43	566.206	-1.48305	0.0836328	-17.7328	2.33969e-70	2.09849e-67
ENSG00000106772,18	158471	prune homolog 2 with BCH domain [Source:HGNC Symbol;Acc:HGNC:25209]	PRUNE2	267.724	-1.23348	0.0702769	-17.5517	5.76945e-69	4.94968e-66
ENSG00000196139,14	8644	aldo-keto reductase family 1 member C3 [Source:HGNC Symbol;Acc:HGNC:386]	AKR1C3	62.4008	2.06596	0.11856	17.4255	5.28795e-68	4.34758e-65
ENSG00000135744,8	183	angiotensinogen [Source:HGNC Symbol;Acc:HGNC:333]	AGT	142.689	-1.76196	0.101232	-17.4051	7.55127e-68	5.96006e-65
ENSG00000131981,16	3958	galectin 3 [Source:HGNC Symbol;Acc:HGNC:6563]	LGALS3	1662.54	-0.88418	0.0510832	-17.3086	4.0507e-67	3.07417e-64
ENSG00000125869,10	24141	lysosomal associated membrane protein family member 5 [Source:HGNC Symbol;Acc:HGNC:16097]	LAMP5	208.4	1.25926	0.073265	17.1878	3.28005e-66	2.39711e-63
ENSG00000115461,5	3488	insulin like growth factor binding protein 5 [Source:HGNC Symbol;Acc:HGNC:5474]	IGFBP5	5328.48	0.958669	0.0560482	17.1044	1.37649e-65	9.70033e-63
ENSG00000108018,15	114815	sortilin related VPS10 domain containing receptor 1 [Source:HGNC Symbol;Acc:HGNC:16697]	SORCS1	173.677	-1.89612	0.112055	-16.9213	3.1328e-64	2.1316e-61
ENSG00000205221,12	5212	vitrin [Source:HGNC Symbol;Acc:HGNC:12697]	VIT	33.6802	2.71883	0.160991	16.8881	5.50386e-64	3.62007e-61
ENSG00000132386,11	5176	serpin family F member 1 [Source:HGNC Symbol;Acc:HGNC:8824]	SERPINF1	40.6778	2.51596	0.150065	16.7658	4.34197e-63	2.76374e-60
ENSG00000100095,19	23544	seizure related 6 homolog like [Source:HGNC Symbol;Acc:HGNC:10763]	SEZ6L	1544.82	-0.820163	0.0491864	-16.6746	2.00555e-62	1.23667e-59
ENSG00000181019,13	1728	NAD(P)H quinone dehydrogenase 1 [Source:HGNC Symbol;Acc:HGNC:2874]	NQO1	755.09	-1.09374	0.0676591	-16.1654	8.83918e-59	5.28529e-56
ENSG00000171724,3	57687	vesicle amine transport 1 like [Source:HGNC Symbol;Acc:HGNC:29315]	VAT1L	916.831	-0.999554	0.0628918	-15.8932	7.05958e-57	4.09705e-54
ENSG00000166833,21	89797	neuron navigator 2 [Source:HGNC Symbol;Acc:HGNC:15997]	NAV2	598.362	-0.801054	0.0505452	-15.8482	1.44559e-56	8.14982e-54
ENSG00000116329,11	4985	opioid receptor delta 1 [Source:HGNC Symbol;Acc:HGNC:8153]	OPRD1	57.4556	1.83588	0.116556	15.7511	6.74931e-56	3.69937e-53
ENSG00000124942,14	79026	AHNAK nucleoprotein [Source:HGNC Symbol;Acc:HGNC:347]	AHNAK	1332.66	-0.776421	0.049556	-15.6676	2.52067e-55	1.34427e-52
ENSG00000111331,13	4940	2'-5'-oligoadenylate synthetase 3 [Source:HGNC Symbol;Acc:HGNC:8088]	OAS3	920.269	-0.882688	0.0565399	-15.6118	6.05263e-55	3.14291e-52
ENSG00000104419,14	10397	N-myc downstream regulated 1 [Source:HGNC Symbol;Acc:HGNC:7679]	NDRG1	1207.81	-1.45609	0.095084	-15.3137	6.19323e-53	3.13346e-50
ENSG00000035862,12	7077	TIMP metallopeptidase inhibitor 2 [Source:HGNC Symbol;Acc:HGNC:11821]	TIMP2	2788.39	-0.646735	0.0425319	-15.2059	3.2325e-52	1.59459e-49
ENSG00000137642,13	6653	sortilin related receptor 1 [Source:HGNC Symbol;Acc:HGNC:11185]	SORL1	937.636	-0.734614	0.0483343	-15.1986	3.61273e-52	1.73869e-49
ENSG00000134121,10	10752	cell adhesion molecule L1 like [Source:HGNC Symbol;Acc:HGNC:1939]	CHL1	1148.83	-1.0655	0.0706735	-15.0764	2.31405e-51	1.08716e-48
ENSG00000245648,2	NA	novel transcript, antisense to KLRK1	AC022075,1	70.5669	1.9729	0.134173	14.7042	6.05897e-49	2.78036e-46
ENSG00000184371,14	1435	colony stimulating factor 1 [Source:HGNC Symbol;Acc:HGNC:2432]	CSF1	345.667	-1.23758	0.0844454	-14.6554	1.2439e-48	5.57834e-46
ENSG00000152092,16	460	astrotactin 1 [Source:HGNC Symbol;Acc:HGNC:773]	ASTN1	239.485	-1.11753	0.0769588	-14.5211	8.90325e-48	3.90398e-45
ENSG00000171476,22	84525	HOP homeobox [Source:HGNC Symbol;Acc:HGNC:24961]	HOPX	396.174	-1.08526	0.0749123	-14.4871	1.46245e-47	6.27328e-45
ENSG00000100311,17	5155	platelet derived growth factor subunit B [Source:HGNC Symbol;Acc:HGNC:8800]	PDGFB	363.783	-1.24164	0.0858871	-14.4566	2.27715e-47	9.56017e-45
ENSG00000268089,3	55879	gamma-aminobutyric acid type A receptor theta subunit [Source:HGNC Symbol;Acc:HGNC:14454]	GABRQ	61.2128	-2.83452	0.196714	-14.4093	4.52296e-47	1.85931e-44
ENSG00000189060,5	3005	H1 histone family member 0 [Source:HGNC Symbol;Acc:HGNC:4714]	H1F0	1532.32	-0.602937	0.0422202	-14.2808	2.88428e-46	1.16148e-43
ENSG00000126785,13	57381	ras homolog family member J [Source:HGNC Symbol;Acc:HGNC:688]	RHOJ	1543.26	0.518524	0.0366571	14.1453	1.9976e-45	7.88332e-43
ENSG00000165478,7	220296	hepatic and glial cell adhesion molecule [Source:HGNC Symbol;Acc:HGNC:26361]	HEPACAM	49.2281	-5.44549	0.3852	-14.1368	2.2531e-45	8.71729e-43
ENSG00000143995,20	4211	Meis homeobox 1 [Source:HGNC Symbol;Acc:HGNC:7000]	MEIS1	722.139	-0.674347	0.0479682	-14.0582	6.85966e-45	2.60298e-42
ENSG00000144191,11	1261	cyclic nucleotide gated channel subunit alpha 3 [Source:HGNC Symbol;Acc:HGNC:2150]	CNGA3	224.76	-1.27934	0.0911475	-14.0359	9.40083e-45	3.49995e-42
ENSG00000187323,12	1630	DCC netrin 1 receptor [Source:HGNC Symbol;Acc:HGNC:2701]	DCC	185.569	-1.43984	0.10264	-14.0281	1.04993e-44	3.83651e-42
ENSG00000013810,19	10460	transforming acidic coiled-coil containing protein 3 [Source:HGNC Symbol;Acc:HGNC:11524]	TACC3	3072	-0.751931	0.0538616	-13.9604	2.7177e-44	9.57602e-42
ENSG00000149136,9	6749	structure specific recognition protein 1 [Source:HGNC Symbol;Acc:HGNC:11327]	SSRP1	1782.81	0.506166	0.0362547	13.9614	2.68186e-44	9.57602e-42
ENSG00000109861,16	1075	cathepsin C [Source:HGNC Symbol;Acc:HGNC:2528]	CTSC	129.083	1.03783	0.0745251	13.926	4.40616e-44	1.52531e-41
ENSG00000221866,9	91584	plexin A4 [Source:HGNC Symbol;Acc:HGNC:9102]	PLXNA4	512.602	-0.94996	0.068507	-13.8666	1.00918e-43	3.43331e-41
ENSG00000101144,13	655	bone morphogenetic protein 7 [Source:HGNC Symbol;Acc:HGNC:1074]	BMP7	747.448	0.667381	0.0481667	13.8557	1.1757e-43	3.93203e-41
ENSG00000152377,14	6695	SPARC (osteonectin), cwcv and kazal like domains proteoglycan 1 [Source:HGNC Symbol;Acc:HGNC:11251]	SPOCK1	279.25	-1.37977	0.0998739	-13.8151	2.06638e-43	6.79564e-41
ENSG00000163531,15	23114	neurofascin [Source:HGNC Symbol;Acc:HGNC:29866]	NFASC	386.05	-1.06953	0.0775457	-13.7923	2.83538e-43	9.17174e-41
ENSG00000136010,14	160428	aldehyde dehydrogenase 1 family member L2 [Source:HGNC Symbol;Acc:HGNC:26777]	ALDH1L2	441.288	0.995165	0.0726735	13.6936	1.10824e-42	3.52708e-40
ENSG00000074657,13	55205	zinc finger protein 532 [Source:HGNC Symbol;Acc:HGNC:30940]	ZNF532	580.784	-0.683769	0.0500587	-13.6594	1.77543e-42	5.56077e-40
ENSG00000179314,14	23302	WSC domain containing 1 [Source:HGNC Symbol;Acc:HGNC:29060]	WSCD1	1148.19	-0.609474	0.0447226	-13.6279	2.73394e-42	8.42909e-40
ENSG00000087086,15	2512	ferritin light chain [Source:HGNC Symbol;Acc:HGNC:3999]	FTL	2929.95	-0.853271	0.0630751	-13.5279	1.0709e-41	3.25094e-39
ENSG00000056972,20	10758	TRAF3 interacting protein 2 [Source:HGNC Symbol;Acc:HGNC:1343]	TRAF3IP2	302.722	0.743976	0.055859	13.3188	1.79905e-40	5.37862e-38
ENSG00000046604,13	1829	desmoglein 2 [Source:HGNC Symbol;Acc:HGNC:3049]	DSG2	55.3231	-1.71258	0.128691	-13.3077	2.08694e-40	6.1462e-38
ENSG00000130287,14	1463	neurocan [Source:HGNC Symbol;Acc:HGNC:2465]	NCAN	1843.97	-0.665618	0.0503318	-13.2246	6.32754e-40	1.8361e-37
ENSG00000101680,15	284217	laminin subunit alpha 1 [Source:HGNC Symbol;Acc:HGNC:6481]	LAMA1	53.264	-1.70795	0.129627	-13.1759	1.20812e-39	3.45488e-37
ENSG00000072210,19	224	aldehyde dehydrogenase 3 family member A2 [Source:HGNC Symbol;Acc:HGNC:403]	ALDH3A2	1452.29	-0.587616	0.0447636	-13.1271	2.30263e-39	6.49078e-37
ENSG00000103888,17	57214	cell migration inducing hyaluronidase 1 [Source:HGNC Symbol;Acc:HGNC:29213]	CEMIP	177.96	-1.14391	0.0874774	-13.0767	4.47562e-39	1.24384e-36
ENSG00000079691,18	55604	capping protein regulator and myosin 1 linker 1 [Source:HGNC Symbol;Acc:HGNC:21581]	CARMIL1	263.384	0.993831	0.0764339	13.0025	1.18423e-38	3.24544e-36
ENSG00000154678,18	5137	phosphodiesterase 1C [Source:HGNC Symbol;Acc:HGNC:8776]	PDE1C	645.89	-0.948034	0.073462	-12.9051	4.21267e-38	1.13869e-35
ENSG00000169862,19	1501	catenin delta 2 [Source:HGNC Symbol;Acc:HGNC:2516]	CTNND2	485.639	-0.807058	0.0628105	-12.8491	8.70214e-38	2.32041e-35
ENSG00000120885,22	1191	clusterin [Source:HGNC Symbol;Acc:HGNC:2095]	CLU	2159.49	-0.599715	0.046945	-12.7748	2.26641e-37	5.96278e-35
ENSG00000120254,15	25902	methylenetetrahydrofolate dehydrogenase (NADP+ dependent) 1 like [Source:HGNC Symbol;Acc:HGNC:21055]	MTHFD1L	465.444	0.707288	0.0554204	12.7622	2.66489e-37	6.9189e-35
ENSG00000124813,23	860	RUNX family transcription factor 2 [Source:HGNC Symbol;Acc:HGNC:10472]	RUNX2	67.4093	1.60463	0.126286	12.7063	5.45409e-37	1.39766e-34
ENSG00000135363,12	4005	LIM domain only 2 [Source:HGNC Symbol;Acc:HGNC:6642]	LMO2	241.955	-0.977173	0.0769951	-12.6914	6.6022e-37	1.67019e-34
ENSG00000100591,8	10598	activator of HSP90 ATPase activity 1 [Source:HGNC Symbol;Acc:HGNC:1189]	AHSA1	557.093	0.621349	0.048996	12.6816	7.47645e-37	1.86741e-34
ENSG00000133466,14	114904	C1q and TNF related 6 [Source:HGNC Symbol;Acc:HGNC:14343]	C1QTNF6	549.415	-0.805411	0.0635707	-12.6695	8.72324e-37	2.15159e-34
ENSG00000134684,10	8565	tyrosyl-tRNA synthetase [Source:HGNC Symbol;Acc:HGNC:12840]	YARS	1175.99	0.641577	0.0506573	12.665	9.23817e-37	2.25046e-34
ENSG00000117069,15	81849	ST6 N-acetylgalactosaminide alpha-2,6-sialyltransferase 5 [Source:HGNC Symbol;Acc:HGNC:19342]	ST6GALNAC5	258.29	-1.14893	0.0915061	-12.5558	3.69511e-36	8.89171e-34
ENSG00000091137,14	5172	solute carrier family 26 member 4 [Source:HGNC Symbol;Acc:HGNC:8818]	SLC26A4	29.7298	2.15747	0.172341	12.5186	5.90667e-36	1.40422e-33
ENSG00000140105,18	7453	tryptophanyl-tRNA synthetase [Source:HGNC Symbol;Acc:HGNC:12729]	WARS	1183.72	0.693351	0.0561457	12.3491	4.9231e-35	1.15646e-32
ENSG00000077942,19	2192	fibulin 1 [Source:HGNC Symbol;Acc:HGNC:3600]	FBLN1	82.8491	1.49707	0.121519	12.3196	7.10286e-35	1.64887e-32
ENSG00000162490,7	374946	dorsal inhibitory axon guidance protein [Source:HGNC Symbol;Acc:HGNC:25054]	DRAXIN	414.683	-0.906378	0.0738646	-12.2708	1.2997e-34	2.98206e-32
ENSG00000164741,15	10395	DLC1 Rho GTPase activating protein [Source:HGNC Symbol;Acc:HGNC:2897]	DLC1	269.536	-0.973169	0.0795709	-12.2302	2.14406e-34	4.86282e-32
ENSG00000169129,15	84632	actin filament associated protein 1 like 2 [Source:HGNC Symbol;Acc:HGNC:25901]	AFAP1L2	58.5404	1.44223	0.118231	12.1985	3.16783e-34	7.10313e-32
ENSG00000090863,11	2734	golgi glycoprotein 1 [Source:HGNC Symbol;Acc:HGNC:4316]	GLG1	2335.51	-0.424483	0.0348363	-12.1851	3.73364e-34	8.27777e-32
ENSG00000180287,16	200150	phospholipase D family member 5 [Source:HGNC Symbol;Acc:HGNC:26879]	PLD5	151.75	1.12242	0.0923833	12.1496	5.76515e-34	1.26398e-31
ENSG00000103034,14	65009	NDRG family member 4 [Source:HGNC Symbol;Acc:HGNC:14466]	NDRG4	371.636	-0.718771	0.0591946	-12.1425	6.28689e-34	1.36322e-31
ENSG00000136542,9	11227	polypeptide N-acetylgalactosaminyltransferase 5 [Source:HGNC Symbol;Acc:HGNC:4127]	GALNT5	69.5738	1.61594	0.133121	12.1389	6.56993e-34	1.40911e-31
ENSG00000076003,5	4175	minichromosome maintenance complex component 6 [Source:HGNC Symbol;Acc:HGNC:6949]	MCM6	909.42	0.504363	0.0415613	12.1354	6.8555e-34	1.45454e-31
ENSG00000109917,11	8882	ZPR1 zinc finger [Source:HGNC Symbol;Acc:HGNC:13051]	ZPR1	333.867	0.67081	0.0555424	12.0775	1.38955e-33	2.91688e-31
ENSG00000166986,15	4141	methionyl-tRNA synthetase [Source:HGNC Symbol;Acc:HGNC:6898]	MARS	1288.22	0.662605	0.0549128	12.0665	1.58753e-33	3.29739e-31
ENSG00000196743,9	2760	GM2 ganglioside activator [Source:HGNC Symbol;Acc:HGNC:4367]	GM2A	109.824	-1.36132	0.113122	-12.0341	2.35218e-33	4.8347e-31
ENSG00000111058,8	79611	acyl-CoA synthetase short chain family member 3 [Source:HGNC Symbol;Acc:HGNC:24723]	ACSS3	282.739	-1.14658	0.0956126	-11.992	3.91402e-33	7.96201e-31
ENSG00000151490,14	5800	protein tyrosine phosphatase receptor type O [Source:HGNC Symbol;Acc:HGNC:9678]	PTPRO	200.683	1.08571	0.090682	11.9727	4.94036e-33	9.94727e-31
ENSG00000151474,23	55691	FERM domain containing 4A [Source:HGNC Symbol;Acc:HGNC:25491]	FRMD4A	671.398	0.570946	0.0478942	11.921	9.20279e-33	1.83424e-30
ENSG00000182463,16	128553	teashirt zinc finger homeobox 2 [Source:HGNC Symbol;Acc:HGNC:13010]	TSHZ2	283.593	-0.814771	0.0686687	-11.8652	1.7937e-32	3.53933e-30
ENSG00000169926,11	51621	Kruppel like factor 13 [Source:HGNC Symbol;Acc:HGNC:13672]	KLF13	816.322	-0.531971	0.0448746	-11.8546	2.03675e-32	3.97913e-30
ENSG00000144711,16	9922	IQ motif and Sec7 domain 1 [Source:HGNC Symbol;Acc:HGNC:29112]	IQSEC1	192.607	-0.968184	0.0819061	-11.8207	3.0526e-32	5.90528e-30
ENSG00000137872,16	80031	semaphorin 6D [Source:HGNC Symbol;Acc:HGNC:16770]	SEMA6D	1148.89	-0.7162	0.0606764	-11.8036	3.73985e-32	7.16453e-30
ENSG00000120549,18	56243	KIAA1217 [Source:HGNC Symbol;Acc:HGNC:25428]	KIAA1217	59.176	1.46966	0.125006	11.7567	6.52141e-32	1.23731e-29
ENSG00000167191,12	51704	G protein-coupled receptor class C group 5 member B [Source:HGNC Symbol;Acc:HGNC:13308]	GPRC5B	1606.92	-0.442126	0.0376121	-11.7549	6.66563e-32	1.25263e-29
ENSG00000188803,15	388336	shisa family member 6 [Source:HGNC Symbol;Acc:HGNC:34491]	SHISA6	86.2069	-1.87886	0.160481	-11.7077	1.16374e-31	2.16631e-29
ENSG00000171617,14	8507	ectodermal-neural cortex 1 [Source:HGNC Symbol;Acc:HGNC:3345]	ENC1	2731.64	-0.46191	0.0397413	-11.6229	3.15171e-31	5.8121e-29
ENSG00000107984,10	22943	dickkopf WNT signaling pathway inhibitor 1 [Source:HGNC Symbol;Acc:HGNC:2891]	DKK1	189.121	-1.25826	0.108451	-11.6022	4.01795e-31	7.29859e-29
ENSG00000117114,19	23266	adhesion G protein-coupled receptor L2 [Source:HGNC Symbol;Acc:HGNC:18582]	ADGRL2	207.608	0.756909	0.0652403	11.6019	4.03176e-31	7.29859e-29
ENSG00000104783,14	3783	potassium calcium-activated channel subfamily N member 4 [Source:HGNC Symbol;Acc:HGNC:6293]	KCNN4	95.6666	1.63355	0.141335	11.558	6.72683e-31	1.20667e-28
ENSG00000065183,16	10885	WD repeat domain 3 [Source:HGNC Symbol;Acc:HGNC:12755]	WDR3	522.811	0.609787	0.0533262	11.435	2.79429e-30	4.9673e-28
ENSG00000117318,9	3399	inhibitor of DNA binding 3, HLH protein [Source:HGNC Symbol;Acc:HGNC:5362]	ID3	535.64	-1.06252	0.09312	-11.4102	3.71812e-30	6.55053e-28
ENSG00000126016,15	154796	angiomotin [Source:HGNC Symbol;Acc:HGNC:17810]	AMOT	136.209	1.00012	0.0878159	11.3888	4.75295e-30	8.29957e-28
ENSG00000133067,17	59352	leucine rich repeat containing G protein-coupled receptor 6 [Source:HGNC Symbol;Acc:HGNC:19719]	LGR6	17.81	3.11253	0.273877	11.3647	6.26771e-30	1.08486e-27
ENSG00000110042,8	23220	deltex E3 ubiquitin ligase 4 [Source:HGNC Symbol;Acc:HGNC:29151]	DTX4	83.7774	1.06598	0.0941541	11.3217	1.02488e-29	1.75852e-27
ENSG00000179776,19	1003	cadherin 5 [Source:HGNC Symbol;Acc:HGNC:1764]	CDH5	222.479	-2.73704	0.242016	-11.3093	1.17962e-29	2.00657e-27
ENSG00000135052,16	51280	golgi membrane protein 1 [Source:HGNC Symbol;Acc:HGNC:15451]	GOLM1	2281.29	-0.514774	0.0455405	-11.3036	1.25891e-29	2.12314e-27
ENSG00000067225,18	5315	pyruvate kinase M1/2 [Source:HGNC Symbol;Acc:HGNC:9021]	PKM	15500.9	-0.434489	0.0384931	-11.2874	1.51393e-29	2.53159e-27
ENSG00000038427,16	1462	versican [Source:HGNC Symbol;Acc:HGNC:2464]	VCAN	2495.32	0.539581	0.0478357	11.2799	1.64969e-29	2.73543e-27
ENSG00000085511,20	4216	mitogen-activated protein kinase kinase kinase 4 [Source:HGNC Symbol;Acc:HGNC:6856]	MAP3K4	398.051	0.649969	0.0576953	11.2655	1.94179e-29	3.19294e-27
ENSG00000103942,13	9455	homer scaffold protein 2 [Source:HGNC Symbol;Acc:HGNC:17513]	HOMER2	1211.09	-0.484266	0.0430647	-11.2451	2.44893e-29	3.99358e-27
ENSG00000163931,16	7086	transketolase [Source:HGNC Symbol;Acc:HGNC:11834]	TKT	1789.65	-0.685368	0.0611005	-11.2171	3.36231e-29	5.43813e-27
ENSG00000169436,17	169044	collagen type XXII alpha 1 chain [Source:HGNC Symbol;Acc:HGNC:22989]	COL22A1	49.3825	-3.19051	0.284459	-11.2161	3.40015e-29	5.45461e-27
ENSG00000185565,12	4045	limbic system associated membrane protein [Source:HGNC Symbol;Acc:HGNC:6705]	LSAMP	122.315	-1.32776	0.118541	-11.2008	4.04051e-29	6.42962e-27
ENSG00000159023,21	2035	erythrocyte membrane protein band 4,1 [Source:HGNC Symbol;Acc:HGNC:3377]	EPB41	89.0911	1.1936	0.106637	11.193	4.41003e-29	6.9615e-27
ENSG00000134107,5	8553	basic helix-loop-helix family member e40 [Source:HGNC Symbol;Acc:HGNC:1046]	BHLHE40	840.295	-0.708898	0.0633786	-11.1851	4.82191e-29	7.55126e-27
ENSG00000099250,18	8829	neuropilin 1 [Source:HGNC Symbol;Acc:HGNC:8004]	NRP1	254.394	-1.55518	0.139205	-11.1718	5.60043e-29	8.7014e-27
ENSG00000151150,22	288	ankyrin 3 [Source:HGNC Symbol;Acc:HGNC:494]	ANK3	463.026	0.667791	0.0598126	11.1647	6.0682e-29	9.35451e-27
ENSG00000114529,12	79669	chromosome 3 open reading frame 52 [Source:HGNC Symbol;Acc:HGNC:26255]	C3orf52	29.6603	2.44582	0.219116	11.1622	6.24285e-29	9.54915e-27
ENSG00000101210,12	1917	eukaryotic translation elongation factor 1 alpha 2 [Source:HGNC Symbol;Acc:HGNC:3192]	EEF1A2	1018.12	-1.26494	0.114272	-11.0695	1.76361e-28	2.67688e-26
ENSG00000054598,9	2296	forkhead box C1 [Source:HGNC Symbol;Acc:HGNC:3800]	FOXC1	62.3318	1.20396	0.108803	11.0655	1.8451e-28	2.7792e-26
ENSG00000114541,15	23150	FERM domain containing 4B [Source:HGNC Symbol;Acc:HGNC:24886]	FRMD4B	1267.93	-0.540134	0.0488267	-11.0623	1.91208e-28	2.85827e-26
ENSG00000166801,15	63901	family with sequence similarity 111 member A [Source:HGNC Symbol;Acc:HGNC:24725]	FAM111A	556.144	0.67187	0.0608747	11.0369	2.53536e-28	3.76149e-26
ENSG00000136002,19	50649	Rho guanine nucleotide exchange factor 4 [Source:HGNC Symbol;Acc:HGNC:684]	ARHGEF4	169.125	-1.17332	0.10632	-11.0357	2.56956e-28	3.78377e-26
ENSG00000100568,11	10490	vesicle transport through interaction with t-SNAREs 1B [Source:HGNC Symbol;Acc:HGNC:17793]	VTI1B	528.782	0.613051	0.0558072	10.9852	4.50423e-28	6.58351e-26
ENSG00000132334,16	5791	protein tyrosine phosphatase receptor type E [Source:HGNC Symbol;Acc:HGNC:9669]	PTPRE	231.898	-0.811155	0.0740256	-10.9578	6.0993e-28	8.84936e-26
ENSG00000118785,14	6696	secreted phosphoprotein 1 [Source:HGNC Symbol;Acc:HGNC:11255]	SPP1	346.058	-1.09539	0.100371	-10.9134	9.94258e-28	1.43202e-25
ENSG00000139292,13	8549	leucine rich repeat containing G protein-coupled receptor 5 [Source:HGNC Symbol;Acc:HGNC:4504]	LGR5	33.3115	2.15617	0.198386	10.8686	1.62757e-27	2.32719e-25
ENSG00000196562,14	55959	sulfatase 2 [Source:HGNC Symbol;Acc:HGNC:20392]	SULF2	51.5067	1.53165	0.141706	10.8087	3.13125e-27	4.44502e-25
ENSG00000131435,13	8572	PDZ and LIM domain 4 [Source:HGNC Symbol;Acc:HGNC:16501]	PDLIM4	229.939	-1.8218	0.168883	-10.7874	3.94993e-27	5.56715e-25
ENSG00000138829,12	2201	fibrillin 2 [Source:HGNC Symbol;Acc:HGNC:3604]	FBN2	494.38	-0.664597	0.0617181	-10.7683	4.86042e-27	6.80183e-25
ENSG00000116016,14	2034	endothelial PAS domain protein 1 [Source:HGNC Symbol;Acc:HGNC:3374]	EPAS1	509.561	0.719994	0.0671029	10.7297	7.38309e-27	1.02594e-24
ENSG00000143786,8	149111	cornichon family AMPA receptor auxiliary protein 3 [Source:HGNC Symbol;Acc:HGNC:26802]	CNIH3	116.067	-1.4728	0.137356	-10.7224	7.98652e-27	1.10203e-24
ENSG00000138944,8	85352	shisa like 1 [Source:HGNC Symbol;Acc:HGNC:29335]	SHISAL1	13.1421	3.64378	0.339963	10.7182	8.36486e-27	1.14622e-24
ENSG00000125968,9	3397	inhibitor of DNA binding 1, HLH protein [Source:HGNC Symbol;Acc:HGNC:5360]	ID1	251.601	-1.4146	0.132247	-10.6967	1.05512e-26	1.43584e-24
ENSG00000005884,18	3675	integrin subunit alpha 3 [Source:HGNC Symbol;Acc:HGNC:6139]	ITGA3	114.211	-1.57819	0.147555	-10.6956	1.06681e-26	1.44181e-24
ENSG00000158186,13	22808	muscle RAS oncogene homolog [Source:HGNC Symbol;Acc:HGNC:7227]	MRAS	149.109	-0.910964	0.0852449	-10.6864	1.17817e-26	1.58148e-24
ENSG00000164733,21	1508	cathepsin B [Source:HGNC Symbol;Acc:HGNC:2527]	CTSB	833.283	-0.538638	0.050535	-10.6587	1.58771e-26	2.1168e-24
ENSG00000125870,11	6629	small nuclear ribonucleoprotein polypeptide B2 [Source:HGNC Symbol;Acc:HGNC:11155]	SNRPB2	479.05	0.72428	0.0679594	10.6575	1.60801e-26	2.12947e-24
ENSG00000159167,12	6781	stanniocalcin 1 [Source:HGNC Symbol;Acc:HGNC:11373]	STC1	1009.57	-0.89523	0.0840724	-10.6483	1.77536e-26	2.33543e-24
ENSG00000117154,12	84966	immunoglobin superfamily member 21 [Source:HGNC Symbol;Acc:HGNC:28246]	IGSF21	183.765	-1.05022	0.0987102	-10.6395	1.9526e-26	2.55157e-24
ENSG00000129244,9	482	ATPase Na+/K+ transporting subunit beta 2 [Source:HGNC Symbol;Acc:HGNC:805]	ATP1B2	981.273	-0.55162	0.0520253	-10.6029	2.88865e-26	3.74992e-24
ENSG00000049246,14	8863	period circadian regulator 3 [Source:HGNC Symbol;Acc:HGNC:8847]	PER3	582.589	-0.471516	0.0445488	-10.5843	3.52549e-26	4.54673e-24
ENSG00000186868,15	4137	microtubule associated protein tau [Source:HGNC Symbol;Acc:HGNC:6893]	MAPT	439.85	-0.680135	0.0644448	-10.5538	4.88054e-26	6.25343e-24
ENSG00000115306,16	6711	spectrin beta, non-erythrocytic 1 [Source:HGNC Symbol;Acc:HGNC:11275]	SPTBN1	3423.82	-0.360216	0.0341603	-10.5449	5.36472e-26	6.82946e-24
ENSG00000174371,17	9156	exonuclease 1 [Source:HGNC Symbol;Acc:HGNC:3511]	EXO1	313.866	0.578582	0.0549752	10.5244	6.66707e-26	8.43299e-24
ENSG00000105974,12	857	caveolin 1 [Source:HGNC Symbol;Acc:HGNC:1527]	CAV1	295.724	0.946461	0.0901354	10.5004	8.59827e-26	1.08064e-23
ENSG00000099260,11	54873	palmdelphin [Source:HGNC Symbol;Acc:HGNC:15846]	PALMD	18.8015	2.39876	0.229294	10.4615	1.29815e-25	1.62121e-23
ENSG00000261602,1	NA	novel transcript	AC092115,2	73.3007	-1.12756	0.107999	-10.4405	1.61984e-25	2.01023e-23
ENSG00000128606,13	10234	leucine rich repeat containing 17 [Source:HGNC Symbol;Acc:HGNC:16895]	LRRC17	53.024	1.21394	0.116287	10.4391	1.64336e-25	2.02667e-23
ENSG00000132780,17	4678	nuclear autoantigenic sperm protein [Source:HGNC Symbol;Acc:HGNC:7644]	NASP	2259.77	0.464557	0.0445069	10.4379	1.66492e-25	2.04051e-23
ENSG00000120875,9	1846	dual specificity phosphatase 4 [Source:HGNC Symbol;Acc:HGNC:3070]	DUSP4	468.92	-0.590235	0.056633	-10.4221	1.96543e-25	2.39394e-23
ENSG00000276600,5	338382	RAB7B, member RAS oncogene family [Source:HGNC Symbol;Acc:HGNC:30513]	RAB7B	107.209	-1.30341	0.125266	-10.4051	2.34949e-25	2.84418e-23
ENSG00000181104,7	2149	coagulation factor II thrombin receptor [Source:HGNC Symbol;Acc:HGNC:3537]	F2R	594.206	-0.628158	0.0606041	-10.3649	3.57964e-25	4.30692e-23
ENSG00000178035,12	3615	inosine monophosphate dehydrogenase 2 [Source:HGNC Symbol;Acc:HGNC:6053]	IMPDH2	1735.85	0.369232	0.0356671	10.3522	4.0907e-25	4.89198e-23
ENSG00000124702,18	116138	kelch domain containing 3 [Source:HGNC Symbol;Acc:HGNC:20704]	KLHDC3	542.155	0.478286	0.0462382	10.344	4.45685e-25	5.29774e-23
ENSG00000170558,9	1000	cadherin 2 [Source:HGNC Symbol;Acc:HGNC:1759]	CDH2	3682.58	-0.474313	0.045891	-10.3356	4.86153e-25	5.74417e-23
ENSG00000110619,17	833	cysteinyl-tRNA synthetase [Source:HGNC Symbol;Acc:HGNC:1493]	CARS	518.029	0.624701	0.0605345	10.3198	5.73698e-25	6.73822e-23
ENSG00000058668,14	493	ATPase plasma membrane Ca2+ transporting 4 [Source:HGNC Symbol;Acc:HGNC:817]	ATP2B4	393.407	-0.590243	0.0573392	-10.2939	7.50968e-25	8.7681e-23
ENSG00000184500,15	5627	protein S [Source:HGNC Symbol;Acc:HGNC:9456]	PROS1	46.9613	-1.79731	0.174935	-10.2742	9.21235e-25	1.06928e-22
ENSG00000207827,1	407029	microRNA 30a [Source:HGNC Symbol;Acc:HGNC:31624]	MIR30A	21.7069	8.63261	0.84095	10.2653	1.01003e-24	1.16549e-22
ENSG00000061337,15	11178	leucine zipper tumor suppressor 1 [Source:HGNC Symbol;Acc:HGNC:13861]	LZTS1	645.25	-0.871599	0.085085	-10.2439	1.26102e-24	1.44665e-22
ENSG00000115380,20	2202	EGF containing fibulin extracellular matrix protein 1 [Source:HGNC Symbol;Acc:HGNC:3218]	EFEMP1	45.3248	-2.63728	0.25813	-10.2169	1.66645e-24	1.90071e-22
ENSG00000105767,3	199731	cell adhesion molecule 4 [Source:HGNC Symbol;Acc:HGNC:30825]	CADM4	539.054	-0.602979	0.0592876	-10.1704	2.68753e-24	3.04772e-22
ENSG00000168496,4	2237	flap structure-specific endonuclease 1 [Source:HGNC Symbol;Acc:HGNC:3650]	FEN1	638.646	0.448534	0.0441791	10.1526	3.22567e-24	3.63708e-22
ENSG00000101134,12	55816	docking protein 5 [Source:HGNC Symbol;Acc:HGNC:16173]	DOK5	481.289	-0.775135	0.0764346	-10.1412	3.62777e-24	4.06723e-22
ENSG00000095739,11	25805	BMP and activin membrane bound inhibitor [Source:HGNC Symbol;Acc:HGNC:30251]	BAMBI	42.1099	1.66521	0.164806	10.1041	5.29923e-24	5.9076e-22
ENSG00000110427,16	25758	KIAA1549 like [Source:HGNC Symbol;Acc:HGNC:24836]	KIAA1549L	461.152	-0.613698	0.060811	-10.0919	5.99966e-24	6.65086e-22
ENSG00000187498,16	1282	collagen type IV alpha 1 chain [Source:HGNC Symbol;Acc:HGNC:2202]	COL4A1	2255.18	-0.4167	0.0413064	-10.088	6.24052e-24	6.87922e-22
ENSG00000046889,19	80243	phosphatidylinositol-3,4,5-trisphosphate dependent Rac exchange factor 2 [Source:HGNC Symbol;Acc:HGNC:22950]	PREX2	146.977	-0.953189	0.0947994	-10.0548	8.75014e-24	9.5921e-22
ENSG00000221932,6	641654	hepatocellular carcinoma, down-regulated 1 [Source:HGNC Symbol;Acc:HGNC:34400]	HEPN1	24.2086	-5.28316	0.525833	-10.0472	9.4511e-24	1.03033e-21
ENSG00000140961,14	29948	oxidative stress induced growth inhibitor 1 [Source:HGNC Symbol;Acc:HGNC:30093]	OSGIN1	38.7048	-2.22466	0.221916	-10.0248	1.18578e-23	1.28559e-21
ENSG00000112319,19	2070	EYA transcriptional coactivator and phosphatase 4 [Source:HGNC Symbol;Acc:HGNC:3522]	EYA4	583.541	0.666851	0.0665685	10.0175	1.27663e-23	1.37653e-21
ENSG00000136261,15	28969	basic leucine zipper and W2 domains 2 [Source:HGNC Symbol;Acc:HGNC:18808]	BZW2	340.326	0.624648	0.0624241	10.0065	1.42706e-23	1.53036e-21
ENSG00000198431,16	7296	thioredoxin reductase 1 [Source:HGNC Symbol;Acc:HGNC:12437]	TXNRD1	1313.15	-0.518991	0.0519872	-9.98305	1.80815e-23	1.92856e-21
ENSG00000111581,10	57122	nucleoporin 107 [Source:HGNC Symbol;Acc:HGNC:29914]	NUP107	813.145	0.486642	0.048916	9.94854	2.55916e-23	2.71491e-21
ENSG00000087250,8	4504	metallothionein 3 [Source:HGNC Symbol;Acc:HGNC:7408]	MT3	478.198	-1.09429	0.110168	-9.93285	2.99563e-23	3.16095e-21
ENSG00000182168,15	8633	unc-5 netrin receptor C [Source:HGNC Symbol;Acc:HGNC:12569]	UNC5C	41.09	1.46926	0.148484	9.89504	4.37446e-23	4.59132e-21
ENSG00000012232,9	2137	exostosin like glycosyltransferase 3 [Source:HGNC Symbol;Acc:HGNC:3518]	EXTL3	2844.09	-0.475738	0.0481107	-9.88842	4.67333e-23	4.87906e-21
ENSG00000105270,15	25999	CAP-Gly domain containing linker protein 3 [Source:HGNC Symbol;Acc:HGNC:24314]	CLIP3	341.915	-0.67562	0.0683622	-9.88294	4.93617e-23	5.12634e-21
ENSG00000031081,11	57514	Rho GTPase activating protein 31 [Source:HGNC Symbol;Acc:HGNC:29216]	ARHGAP31	1217.49	-0.412678	0.0417778	-9.87793	5.18938e-23	5.36109e-21
ENSG00000145284,12	79966	stearoyl-CoA desaturase 5 [Source:HGNC Symbol;Acc:HGNC:21088]	SCD5	537.276	-0.634193	0.0643209	-9.85983	6.21554e-23	6.38776e-21
ENSG00000084623,11	8668	eukaryotic translation initiation factor 3 subunit I [Source:HGNC Symbol;Acc:HGNC:3272]	EIF3I	1094.45	0.432493	0.0438782	9.85668	6.41363e-23	6.55719e-21
ENSG00000073849,15	6480	ST6 beta-galactoside alpha-2,6-sialyltransferase 1 [Source:HGNC Symbol;Acc:HGNC:10860]	ST6GAL1	187.559	0.73779	0.0749609	9.84233	7.39756e-23	7.52416e-21
ENSG00000144283,21	8502	plakophilin 4 [Source:HGNC Symbol;Acc:HGNC:9026]	PKP4	665.932	0.438334	0.0447838	9.78779	1.27047e-22	1.28559e-20
ENSG00000166250,12	79827	CXADR like membrane protein [Source:HGNC Symbol;Acc:HGNC:24039]	CLMP	116.777	0.774209	0.0791316	9.78382	1.3213e-22	1.3302e-20
ENSG00000163918,10	5984	replication factor C subunit 4 [Source:HGNC Symbol;Acc:HGNC:9972]	RFC4	560.12	0.454142	0.0464242	9.78244	1.3394e-22	1.34157e-20
ENSG00000101577,9	9663	lipin 2 [Source:HGNC Symbol;Acc:HGNC:14450]	LPIN2	590.91	-0.463548	0.0474025	-9.77897	1.38619e-22	1.38143e-20
ENSG00000124762,13	1026	cyclin dependent kinase inhibitor 1A [Source:HGNC Symbol;Acc:HGNC:1784]	CDKN1A	613.617	-0.690186	0.0710433	-9.71502	2.60209e-22	2.58013e-20
ENSG00000100167,20	55964	septin 3 [Source:HGNC Symbol;Acc:HGNC:10750]	SEPTIN3	598.838	-0.470112	0.0486116	-9.67078	4.01313e-22	3.95935e-20
ENSG00000112893,9	4124	mannosidase alpha class 2A member 1 [Source:HGNC Symbol;Acc:HGNC:6824]	MAN2A1	226.217	-0.712375	0.0740255	-9.62337	6.37064e-22	6.254e-20
ENSG00000240184,7	5098	protocadherin gamma subfamily C, 3 [Source:HGNC Symbol;Acc:HGNC:8716]	PCDHGC3	3908.34	-0.512163	0.0532742	-9.61372	6.99769e-22	6.83556e-20
ENSG00000145730,20	5066	peptidylglycine alpha-amidating monooxygenase [Source:HGNC Symbol;Acc:HGNC:8596]	PAM	1637.12	-0.586761	0.0610955	-9.60399	7.69089e-22	7.4757e-20
ENSG00000204576,11	80742	proline rich 3 [Source:HGNC Symbol;Acc:HGNC:21149]	PRR3	226.979	0.657619	0.068657	9.57833	9.86223e-22	9.53929e-20
ENSG00000022267,19	2273	four and a half LIM domains 1 [Source:HGNC Symbol;Acc:HGNC:3702]	FHL1	959.106	-0.456105	0.0477051	-9.56094	1.1669e-21	1.12318e-19
ENSG00000187416,12	375612	LHFPL tetraspan subfamily member 3 [Source:HGNC Symbol;Acc:HGNC:6589]	LHFPL3	431.894	-0.550659	0.0576309	-9.55492	1.23677e-21	1.18465e-19
ENSG00000152291,14	10618	trans-golgi network protein 2 [Source:HGNC Symbol;Acc:HGNC:15450]	TGOLN2	2287.27	-0.333298	0.0352474	-9.45596	3.20074e-21	3.05107e-19
ENSG00000114805,17	23007	phospholipase C eta 1 [Source:HGNC Symbol;Acc:HGNC:29185]	PLCH1	186.009	0.765946	0.0810593	9.4492	3.4144e-21	3.2239e-19
ENSG00000170540,15	23204	ADP ribosylation factor like GTPase 6 interacting protein 1 [Source:HGNC Symbol;Acc:HGNC:697]	ARL6IP1	3516.95	-0.641395	0.0678783	-9.44919	3.41473e-21	3.2239e-19
ENSG00000185950,9	8660	insulin receptor substrate 2 [Source:HGNC Symbol;Acc:HGNC:6126]	IRS2	802.346	-0.423075	0.0448049	-9.4426	3.63634e-21	3.41677e-19
ENSG00000155093,19	5799	protein tyrosine phosphatase receptor type N2 [Source:HGNC Symbol;Acc:HGNC:9677]	PTPRN2	132.733	-1.1414	0.1211	-9.42525	4.29071e-21	4.01252e-19
ENSG00000149256,16	26011	teneurin transmembrane protein 4 [Source:HGNC Symbol;Acc:HGNC:29945]	TENM4	322.845	-0.801027	0.0850301	-9.42051	4.48888e-21	4.17804e-19
ENSG00000106366,8	5054	serpin family E member 1 [Source:HGNC Symbol;Acc:HGNC:8583]	SERPINE1	365.477	-0.941732	0.100134	-9.40468	5.21874e-21	4.83457e-19
ENSG00000185760,15	56479	potassium voltage-gated channel subfamily Q member 5 [Source:HGNC Symbol;Acc:HGNC:6299]	KCNQ5	8.86504	3.83035	0.407426	9.40134	5.38743e-21	4.96751e-19
ENSG00000106105,14	2617	glycyl-tRNA synthetase [Source:HGNC Symbol;Acc:HGNC:4162]	GARS	2094.04	0.558002	0.0595047	9.37746	6.75839e-21	6.19768e-19
ENSG00000122952,17	11130	ZW10 interacting kinetochore protein [Source:HGNC Symbol;Acc:HGNC:13195]	ZWINT	610.429	0.404718	0.0431605	9.37705	6.7844e-21	6.19768e-19
ENSG00000138363,15	471	5-aminoimidazole-4-carboxamide ribonucleotide formyltransferase/IMP cyclohydrolase [Source:HGNC Symbol;Acc:HGNC:794]	ATIC	608.684	0.4578	0.0488482	9.3719	7.12365e-21	6.47759e-19
ENSG00000196767,9	5456	POU class 3 homeobox 4 [Source:HGNC Symbol;Acc:HGNC:9217]	POU3F4	226.381	-0.688663	0.0737389	-9.33921	9.70583e-21	8.78511e-19
ENSG00000108602,18	218	aldehyde dehydrogenase 3 family member A1 [Source:HGNC Symbol;Acc:HGNC:405]	ALDH3A1	178.384	-1.01372	0.108603	-9.33418	1.01773e-20	9.16978e-19
ENSG00000198932,13	9737	G protein-coupled receptor associated sorting protein 1 [Source:HGNC Symbol;Acc:HGNC:24834]	GPRASP1	230.353	0.661854	0.0709275	9.33142	1.04467e-20	9.36971e-19
ENSG00000267601,1	NA	novel transcript, antisense to TIMP2	AC022966,1	435.693	-0.689291	0.0739007	-9.32726	1.08646e-20	9.70043e-19
ENSG00000115738,10	3398	inhibitor of DNA binding 2 [Source:HGNC Symbol;Acc:HGNC:5361]	ID2	233.564	-0.953944	0.102418	-9.3142	1.2288e-20	1.0922e-18
ENSG00000131711,15	4131	microtubule associated protein 1B [Source:HGNC Symbol;Acc:HGNC:6836]	MAP1B	2412.16	-0.548805	0.0589571	-9.30855	1.29593e-20	1.14669e-18
ENSG00000186007,10	93273	LEM domain containing 1 [Source:HGNC Symbol;Acc:HGNC:18725]	LEMD1	108.652	-1.02763	0.110429	-9.30582	1.32959e-20	1.17123e-18
ENSG00000001461,17	57185	NIPA like domain containing 3 [Source:HGNC Symbol;Acc:HGNC:25233]	NIPAL3	1150.05	-0.411493	0.0442608	-9.297	1.44459e-20	1.26688e-18
ENSG00000144645,14	114884	oxysterol binding protein like 10 [Source:HGNC Symbol;Acc:HGNC:16395]	OSBPL10	89.3745	1.21607	0.130915	9.28901	1.55735e-20	1.35972e-18
ENSG00000163637,13	166336	prickle planar cell polarity protein 2 [Source:HGNC Symbol;Acc:HGNC:20340]	PRICKLE2	720.123	-0.464203	0.049979	-9.28797	1.5726e-20	1.36699e-18
ENSG00000132718,9	23208	synaptotagmin 11 [Source:HGNC Symbol;Acc:HGNC:19239]	SYT11	2103.04	-0.455012	0.0490021	-9.28557	1.60844e-20	1.39201e-18
ENSG00000166963,13	4130	microtubule associated protein 1A [Source:HGNC Symbol;Acc:HGNC:6835]	MAP1A	747.614	-0.544996	0.0587832	-9.27128	1.83922e-20	1.58478e-18
ENSG00000158769,18	50848	F11 receptor [Source:HGNC Symbol;Acc:HGNC:14685]	F11R	62.3638	-1.51689	0.163669	-9.26803	1.89618e-20	1.62675e-18
ENSG00000198794,12	192683	secretory carrier membrane protein 5 [Source:HGNC Symbol;Acc:HGNC:30386]	SCAMP5	258.687	-0.711099	0.0769771	-9.23779	2.51638e-20	2.14949e-18
ENSG00000144040,12	94097	sideroflexin 5 [Source:HGNC Symbol;Acc:HGNC:16073]	SFXN5	241.869	-0.695718	0.0753499	-9.23317	2.62745e-20	2.23469e-18
ENSG00000126562,17	65266	WNK lysine deficient protein kinase 4 [Source:HGNC Symbol;Acc:HGNC:14544]	WNK4	617.839	-1.01757	0.110297	-9.22569	2.81733e-20	2.38591e-18
ENSG00000129675,16	9459	Rac/Cdc42 guanine nucleotide exchange factor 6 [Source:HGNC Symbol;Acc:HGNC:685]	ARHGEF6	1110.12	0.51922	0.0564774	9.19341	3.8057e-20	3.19549e-18
ENSG00000147588,7	5375	peripheral myelin protein 2 [Source:HGNC Symbol;Acc:HGNC:9117]	PMP2	320.265	0.624589	0.0679361	9.19377	3.79313e-20	3.19549e-18
ENSG00000130477,15	23025	unc-13 homolog A [Source:HGNC Symbol;Acc:HGNC:23150]	UNC13A	1395.94	-0.514111	0.0559951	-9.18136	4.25674e-20	3.55907e-18
ENSG00000081803,16	93664	calcium dependent secretion activator 2 [Source:HGNC Symbol;Acc:HGNC:16018]	CADPS2	52.4923	1.07811	0.117469	9.17779	4.40041e-20	3.66367e-18
ENSG00000137070,17	3590	interleukin 11 receptor subunit alpha [Source:HGNC Symbol;Acc:HGNC:5967]	IL11RA	59.5806	-1.59388	0.173766	-9.17256	4.61898e-20	3.82949e-18
ENSG00000152578,13	2893	glutamate ionotropic receptor AMPA type subunit 4 [Source:HGNC Symbol;Acc:HGNC:4574]	GRIA4	450.661	0.678886	0.0741165	9.15971	5.20353e-20	4.29607e-18
ENSG00000248383,4	56135	protocadherin alpha subfamily C, 1 [Source:HGNC Symbol;Acc:HGNC:8676]	PCDHAC1	47.8811	-1.59393	0.174091	-9.15572	5.39956e-20	4.43934e-18
ENSG00000011028,14	9902	mannose receptor C type 2 [Source:HGNC Symbol;Acc:HGNC:16875]	MRC2	1810.91	-1.01962	0.111746	-9.12451	7.20643e-20	5.9003e-18
ENSG00000164683,17	23462	hes related family bHLH transcription factor with YRPW motif 1 [Source:HGNC Symbol;Acc:HGNC:4880]	HEY1	99.6269	0.91852	0.100677	9.12344	7.27768e-20	5.93402e-18
ENSG00000127241,16	5648	mannan binding lectin serine peptidase 1 [Source:HGNC Symbol;Acc:HGNC:6901]	MASP1	33.7845	1.42548	0.157302	9.06208	1.2799e-19	1.0393e-17
ENSG00000110107,9	27339	pre-mRNA processing factor 19 [Source:HGNC Symbol;Acc:HGNC:17896]	PRPF19	1078.09	0.419096	0.0462805	9.05555	1.35876e-19	1.09882e-17
ENSG00000091136,14	3912	laminin subunit beta 1 [Source:HGNC Symbol;Acc:HGNC:6486]	LAMB1	1416.37	0.334518	0.0369842	9.04488	1.49831e-19	1.20672e-17
ENSG00000124733,5	4201	male-enhanced antigen 1 [Source:HGNC Symbol;Acc:HGNC:6986]	MEA1	836.764	0.471998	0.052197	9.04264	1.52934e-19	1.2267e-17
ENSG00000159784,17	9715	family with sequence similarity 131 member B [Source:HGNC Symbol;Acc:HGNC:22202]	FAM131B	850.432	-0.459028	0.0507689	-9.04151	1.54523e-19	1.23443e-17
ENSG00000227057,10	9277	WD repeat domain 46 [Source:HGNC Symbol;Acc:HGNC:13923]	WDR46	308.117	0.551607	0.0610154	9.04045	1.56034e-19	1.24148e-17
ENSG00000105894,12	5764	pleiotrophin [Source:HGNC Symbol;Acc:HGNC:9630]	PTN	5093.85	-0.418461	0.0463296	-9.03227	1.68151e-19	1.33252e-17
ENSG00000146006,8	26045	leucine rich repeat transmembrane neuronal 2 [Source:HGNC Symbol;Acc:HGNC:19409]	LRRTM2	231.094	-0.698028	0.0774613	-9.01132	2.03596e-19	1.60694e-17
ENSG00000143195,13	387597	immunoglobulin like domain containing receptor 2 [Source:HGNC Symbol;Acc:HGNC:18131]	ILDR2	333.632	0.569946	0.063329	8.99976	2.26207e-19	1.7783e-17
ENSG00000187678,9	81848	sprouty RTK signaling antagonist 4 [Source:HGNC Symbol;Acc:HGNC:15533]	SPRY4	1492.91	-0.415092	0.0461486	-8.99469	2.36894e-19	1.85492e-17
ENSG00000189057,11	374393	family with sequence similarity 111 member B [Source:HGNC Symbol;Acc:HGNC:24200]	FAM111B	396.844	0.617466	0.0686951	8.9885	2.50616e-19	1.95461e-17
ENSG00000167996,16	2495	ferritin heavy chain 1 [Source:HGNC Symbol;Acc:HGNC:3976]	FTH1	2302.66	-0.401641	0.0446961	-8.98604	2.563e-19	1.99107e-17
ENSG00000106245,11	8896	BUD31 homolog [Source:HGNC Symbol;Acc:HGNC:29629]	BUD31	589.674	0.501691	0.0558492	8.98296	2.63574e-19	2.03955e-17
ENSG00000101384,12	182	jagged canonical Notch ligand 1 [Source:HGNC Symbol;Acc:HGNC:6188]	JAG1	1089.79	-0.434227	0.0484013	-8.97139	2.92786e-19	2.25674e-17
ENSG00000119547,6	9480	one cut homeobox 2 [Source:HGNC Symbol;Acc:HGNC:8139]	ONECUT2	213.527	-0.788061	0.0878729	-8.96819	3.0142e-19	2.31425e-17
ENSG00000056736,10	55540	interleukin 17 receptor B [Source:HGNC Symbol;Acc:HGNC:18015]	IL17RB	79.0028	0.933645	0.104128	8.96636	3.06487e-19	2.34403e-17
ENSG00000177283,7	8325	frizzled class receptor 8 [Source:HGNC Symbol;Acc:HGNC:4046]	FZD8	476.85	-0.646196	0.0720985	-8.9627	3.16837e-19	2.41383e-17
ENSG00000149260,18	726	calpain 5 [Source:HGNC Symbol;Acc:HGNC:1482]	CAPN5	391.372	-0.656612	0.0734411	-8.94067	3.86822e-19	2.93568e-17
ENSG00000205809,9	3822	killer cell lectin like receptor C2 [Source:HGNC Symbol;Acc:HGNC:6375]	KLRC2	8.37995	3.1603	0.354466	8.91568	4.84816e-19	3.66528e-17
ENSG00000108846,16	8714	ATP binding cassette subfamily C member 3 [Source:HGNC Symbol;Acc:HGNC:54]	ABCC3	317.049	-0.913514	0.102576	-8.90573	5.30345e-19	3.99419e-17
ENSG00000273749,5	23191	cytoplasmic FMR1 interacting protein 1 [Source:HGNC Symbol;Acc:HGNC:13759]	CYFIP1	1240.62	-0.304964	0.0342941	-8.8926	5.96957e-19	4.47877e-17
ENSG00000092621,12	26227	phosphoglycerate dehydrogenase [Source:HGNC Symbol;Acc:HGNC:8923]	PHGDH	1759.15	0.684581	0.0769975	8.89095	6.05902e-19	4.52866e-17
ENSG00000142949,17	5792	protein tyrosine phosphatase receptor type F [Source:HGNC Symbol;Acc:HGNC:9670]	PTPRF	1058.73	-0.683366	0.0769338	-8.88252	6.53625e-19	4.86692e-17
ENSG00000120438,12	6950	t-complex 1 [Source:HGNC Symbol;Acc:HGNC:11655]	TCP1	1827.54	0.395858	0.0446151	8.87273	7.13759e-19	5.29469e-17
ENSG00000171951,5	7857	secretogranin II [Source:HGNC Symbol;Acc:HGNC:10575]	SCG2	3724.87	-0.613328	0.0691483	-8.86976	7.33051e-19	5.41744e-17
ENSG00000107937,19	23560	GTP binding protein 4 [Source:HGNC Symbol;Acc:HGNC:21535]	GTPBP4	878.884	0.469155	0.0529562	8.8593	8.0521e-19	5.92851e-17
ENSG00000065534,18	4638	myosin light chain kinase [Source:HGNC Symbol;Acc:HGNC:7590]	MYLK	132.531	-0.885937	0.100671	-8.80032	1.36426e-18	1.00073e-16
ENSG00000163235,16	7039	transforming growth factor alpha [Source:HGNC Symbol;Acc:HGNC:11765]	TGFA	179.068	-1.07325	0.122078	-8.79156	1.47495e-18	1.07792e-16
ENSG00000153956,16	781	calcium voltage-gated channel auxiliary subunit alpha2delta 1 [Source:HGNC Symbol;Acc:HGNC:1399]	CACNA2D1	17.8189	2.28576	0.260031	8.79033	1.49122e-18	1.08578e-16
ENSG00000184221,13	116448	oligodendrocyte transcription factor 1 [Source:HGNC Symbol;Acc:HGNC:16983]	OLIG1	535.996	-0.798676	0.0909401	-8.78245	1.59957e-18	1.16039e-16
ENSG00000065328,16	55388	minichromosome maintenance 10 replication initiation factor [Source:HGNC Symbol;Acc:HGNC:18043]	MCM10	755.13	0.352261	0.0401415	8.77547	1.70189e-18	1.2301e-16
ENSG00000205978,6	57523	NYN domain and retroviral integrase containing [Source:HGNC Symbol;Acc:HGNC:20165]	NYNRIN	78.8129	-0.946666	0.107966	-8.76815	1.81623e-18	1.30795e-16
ENSG00000100968,14	4776	nuclear factor of activated T cells 4 [Source:HGNC Symbol;Acc:HGNC:7778]	NFATC4	70.4825	-1.53258	0.174944	-8.7604	1.94562e-18	1.39098e-16
ENSG00000198729,5	81706	protein phosphatase 1 regulatory inhibitor subunit 14C [Source:HGNC Symbol;Acc:HGNC:14952]	PPP1R14C	108.285	0.760491	0.0868078	8.76064	1.94148e-18	1.39098e-16
ENSG00000029364,12	55334	solute carrier family 39 member 9 [Source:HGNC Symbol;Acc:HGNC:20182]	SLC39A9	1270.84	0.367916	0.0420043	8.75902	1.96959e-18	1.40303e-16
ENSG00000160145,15	8997	kalirin RhoGEF kinase [Source:HGNC Symbol;Acc:HGNC:4814]	KALRN	128.658	-0.869255	0.099472	-8.73869	2.35831e-18	1.67389e-16
ENSG00000132475,10	3021	H3 histone family member 3B [Source:HGNC Symbol;Acc:HGNC:4765]	H3F3B	2987.46	-0.300246	0.0344221	-8.72248	2.72162e-18	1.92484e-16
ENSG00000076344,16	8786	regulator of G protein signaling 11 [Source:HGNC Symbol;Acc:HGNC:9993]	RGS11	40.0582	-2.0098	0.231213	-8.6924	3.54864e-18	2.50078e-16
ENSG00000065320,9	9423	netrin 1 [Source:HGNC Symbol;Acc:HGNC:8029]	NTN1	44.7303	-1.37111	0.157771	-8.69052	3.60769e-18	2.53334e-16
ENSG00000144868,13	66000	transmembrane protein 108 [Source:HGNC Symbol;Acc:HGNC:28451]	TMEM108	168.384	-0.620187	0.0714203	-8.68362	3.83363e-18	2.68246e-16
ENSG00000152049,6	23704	potassium voltage-gated channel subfamily E regulatory subunit 4 [Source:HGNC Symbol;Acc:HGNC:6244]	KCNE4	548.467	-0.514055	0.059218	-8.68073	3.93249e-18	2.7419e-16
ENSG00000109436,8	23158	TBC1 domain family member 9 [Source:HGNC Symbol;Acc:HGNC:21710]	TBC1D9	90.249	-0.972024	0.112204	-8.663	4.59502e-18	3.19257e-16
ENSG00000146242,8	7162	trophoblast glycoprotein [Source:HGNC Symbol;Acc:HGNC:12004]	TPBG	14.6604	7.36275	0.850527	8.6567	4.85614e-18	3.3504e-16
ENSG00000183087,15	2621	growth arrest specific 6 [Source:HGNC Symbol;Acc:HGNC:4168]	GAS6	60.5396	-1.37008	0.158267	-8.6568	4.85188e-18	3.3504e-16
ENSG00000204220,11	10471	prefoldin subunit 6 [Source:HGNC Symbol;Acc:HGNC:4926]	PFDN6	242.78	0.688109	0.0795649	8.6484	5.22243e-18	3.59055e-16
ENSG00000135842,17	116496	niban apoptosis regulator 1 [Source:HGNC Symbol;Acc:HGNC:16784]	NIBAN1	1521	-0.403021	0.0466033	-8.64793	5.24436e-18	3.59311e-16
ENSG00000049860,14	3074	hexosaminidase subunit beta [Source:HGNC Symbol;Acc:HGNC:4879]	HEXB	876.904	-0.372692	0.0431214	-8.64286	5.48252e-18	3.74329e-16
ENSG00000106244,13	11333	PDGFA associated protein 1 [Source:HGNC Symbol;Acc:HGNC:14634]	PDAP1	875.178	0.424107	0.0491037	8.63697	5.77216e-18	3.92745e-16
ENSG00000092445,12	7301	TYRO3 protein tyrosine kinase [Source:HGNC Symbol;Acc:HGNC:12446]	TYRO3	532.214	-0.468173	0.0542092	-8.63642	5.80033e-18	3.93306e-16
ENSG00000147408,14	55790	chondroitin sulfate N-acetylgalactosaminyltransferase 1 [Source:HGNC Symbol;Acc:HGNC:24290]	CSGALNACT1	214.092	-0.716173	0.0830653	-8.62181	6.59018e-18	4.43814e-16
ENSG00000175899,14	2	alpha-2-macroglobulin [Source:HGNC Symbol;Acc:HGNC:7]	A2M	3059.38	-0.460836	0.0534498	-8.62185	6.58831e-18	4.43814e-16
ENSG00000138613,14	83464	aph-1 homolog B, gamma-secretase subunit [Source:HGNC Symbol;Acc:HGNC:24080]	APH1B	259.064	-0.576973	0.0670546	-8.60452	7.66392e-18	5.14369e-16
ENSG00000092964,18	1808	dihydropyrimidinase like 2 [Source:HGNC Symbol;Acc:HGNC:3014]	DPYSL2	1519.61	-0.381554	0.0443751	-8.59838	8.08473e-18	5.40773e-16
ENSG00000137198,10	2766	guanosine monophosphate reductase [Source:HGNC Symbol;Acc:HGNC:4376]	GMPR	48.7979	1.16465	0.135529	8.59337	8.44528e-18	5.62981e-16
ENSG00000126749,16	10436	EMG1 N1-specific pseudouridine methyltransferase [Source:HGNC Symbol;Acc:HGNC:16912]	EMG1	445.634	0.424569	0.0494946	8.57807	9.64748e-18	6.40956e-16
ENSG00000120693,13	4093	SMAD family member 9 [Source:HGNC Symbol;Acc:HGNC:6774]	SMAD9	134.844	-0.868912	0.10145	-8.56492	1.08153e-17	7.16134e-16
ENSG00000124766,7	6659	SRY-box transcription factor 4 [Source:HGNC Symbol;Acc:HGNC:11200]	SOX4	525.498	0.467454	0.0546075	8.56026	1.12611e-17	7.43156e-16
ENSG00000165819,12	56339	methyltransferase like 3 [Source:HGNC Symbol;Acc:HGNC:17563]	METTL3	709.78	0.351758	0.0411298	8.5524	1.20551e-17	7.92904e-16
ENSG00000092051,17	84502	junctophilin 4 [Source:HGNC Symbol;Acc:HGNC:20156]	JPH4	50.3433	-1.27821	0.149481	-8.55098	1.2205e-17	7.99291e-16
ENSG00000163249,12	151195	cyclin Y like 1 [Source:HGNC Symbol;Acc:HGNC:26868]	CCNYL1	381.868	0.53393	0.0624427	8.55071	1.22332e-17	7.99291e-16
ENSG00000165194,15	57526	protocadherin 19 [Source:HGNC Symbol;Acc:HGNC:14270]	PCDH19	144.642	0.724661	0.0848237	8.54314	1.30622e-17	8.50636e-16
ENSG00000169813,16	3185	heterogeneous nuclear ribonucleoprotein F [Source:HGNC Symbol;Acc:HGNC:5039]	HNRNPF	1127.97	0.311706	0.0365585	8.52623	1.51195e-17	9.81377e-16
ENSG00000135678,12	1368	carboxypeptidase M [Source:HGNC Symbol;Acc:HGNC:2311]	CPM	55.7939	1.08353	0.12714	8.52236	1.56333e-17	1.0114e-15
ENSG00000197872,11	81553	family with sequence similarity 49 member A [Source:HGNC Symbol;Acc:HGNC:25373]	FAM49A	338.334	-0.682466	0.0801988	-8.50967	1.74423e-17	1.12474e-15
ENSG00000166226,13	10576	chaperonin containing TCP1 subunit 2 [Source:HGNC Symbol;Acc:HGNC:1615]	CCT2	1415.53	0.464693	0.0546691	8.50011	1.89419e-17	1.21746e-15
ENSG00000151025,11	57512	G protein-coupled receptor 158 [Source:HGNC Symbol;Acc:HGNC:23689]	GPR158	65.3209	-1.3696	0.161137	-8.49957	1.90287e-17	1.21907e-15
ENSG00000196839,13	100	adenosine deaminase [Source:HGNC Symbol;Acc:HGNC:186]	ADA	72.9015	1.11578	0.131381	8.49273	2.01839e-17	1.2889e-15
ENSG00000135540,11	57224	NHS like 1 [Source:HGNC Symbol;Acc:HGNC:21021]	NHSL1	470.962	0.444938	0.0524256	8.48703	2.11978e-17	1.34618e-15
ENSG00000156232,7	123720	WASP homolog associated with actin, golgi membranes and microtubules [Source:HGNC Symbol;Acc:HGNC:30493]	WHAMM	292.952	-0.595623	0.0701812	-8.48693	2.12173e-17	1.34618e-15
ENSG00000103647,12	10391	coronin 2B [Source:HGNC Symbol;Acc:HGNC:2256]	CORO2B	2123.56	-0.324451	0.0382576	-8.48071	2.23831e-17	1.41559e-15
ENSG00000102804,15	8848	TSC22 domain family member 1 [Source:HGNC Symbol;Acc:HGNC:16826]	TSC22D1	1483.12	-0.279344	0.0330507	-8.45199	2.86382e-17	1.80539e-15
ENSG00000133401,16	23037	PDZ domain containing 2 [Source:HGNC Symbol;Acc:HGNC:18486]	PDZD2	480.01	-0.43153	0.0510784	-8.44839	2.95335e-17	1.85591e-15
ENSG00000033327,13	9846	GRB2 associated binding protein 2 [Source:HGNC Symbol;Acc:HGNC:14458]	GAB2	256.148	0.517078	0.0612635	8.44023	3.1672e-17	1.98398e-15
ENSG00000107796,13	59	actin alpha 2, smooth muscle [Source:HGNC Symbol;Acc:HGNC:130]	ACTA2	69.1428	0.864665	0.102475	8.43782	3.23299e-17	2.01878e-15
ENSG00000165029,16	19	ATP binding cassette subfamily A member 1 [Source:HGNC Symbol;Acc:HGNC:29]	ABCA1	139.752	-0.764767	0.0907603	-8.42622	3.56996e-17	2.22216e-15
ENSG00000162981,14	151354	LRAT domain containing 1 [Source:HGNC Symbol;Acc:HGNC:20743]	LRATD1	90.7417	-1.34633	0.159922	-8.41868	3.80735e-17	2.36248e-15
ENSG00000179241,13	143458	low density lipoprotein receptor class A domain containing 3 [Source:HGNC Symbol;Acc:HGNC:27046]	LDLRAD3	429.41	0.445161	0.0529528	8.40675	4.21518e-17	2.60734e-15
ENSG00000111361,13	1967	eukaryotic translation initiation factor 2B subunit alpha [Source:HGNC Symbol;Acc:HGNC:3257]	EIF2B1	441.993	0.463802	0.0551959	8.40283	4.35844e-17	2.68752e-15
ENSG00000144834,14	29114	transgelin 3 [Source:HGNC Symbol;Acc:HGNC:29868]	TAGLN3	52.8771	1.01781	0.121153	8.40107	4.42445e-17	2.71128e-15
ENSG00000166348,18	159195	ubiquitin specific peptidase 54 [Source:HGNC Symbol;Acc:HGNC:23513]	USP54	859.373	0.364531	0.0433904	8.4012	4.41946e-17	2.71128e-15
ENSG00000172893,15	1717	7-dehydrocholesterol reductase [Source:HGNC Symbol;Acc:HGNC:2860]	DHCR7	760.419	-0.576117	0.0686144	-8.39644	4.60202e-17	2.81137e-15
ENSG00000016391,11	55349	choline dehydrogenase [Source:HGNC Symbol;Acc:HGNC:24288]	CHDH	44.4495	1.12054	0.133463	8.39584	4.62559e-17	2.81704e-15
ENSG00000170345,10	2353	Fos proto-oncogene, AP-1 transcription factor subunit [Source:HGNC Symbol;Acc:HGNC:3796]	FOS	191.039	-0.813717	0.0970538	-8.38419	5.10777e-17	3.10113e-15
ENSG00000161638,11	3678	integrin subunit alpha 5 [Source:HGNC Symbol;Acc:HGNC:6141]	ITGA5	219.606	-0.789302	0.0942519	-8.37438	5.55133e-17	3.36008e-15
ENSG00000165895,19	143872	Rho GTPase activating protein 42 [Source:HGNC Symbol;Acc:HGNC:26545]	ARHGAP42	407.213	-0.621913	0.0742961	-8.37073	5.72614e-17	3.45529e-15
ENSG00000089127,13	4938	2'-5'-oligoadenylate synthetase 1 [Source:HGNC Symbol;Acc:HGNC:8086]	OAS1	42.7513	-1.54933	0.185215	-8.36502	6.01031e-17	3.61572e-15
ENSG00000009413,15	5980	REV3 like, DNA directed polymerase zeta catalytic subunit [Source:HGNC Symbol;Acc:HGNC:9968]	REV3L	2399.07	0.456411	0.0546599	8.35002	6.82496e-17	4.09332e-15
ENSG00000142864,14	26135	SERPINE1 mRNA binding protein 1 [Source:HGNC Symbol;Acc:HGNC:17860]	SERBP1	1936.49	0.353796	0.042415	8.34129	7.34826e-17	4.39381e-15
ENSG00000139219,19	1280	collagen type II alpha 1 chain [Source:HGNC Symbol;Acc:HGNC:2200]	COL2A1	26.4014	1.43022	0.171517	8.33865	7.51434e-17	4.47954e-15
ENSG00000198732,10	64093	SPARC related modular calcium binding 1 [Source:HGNC Symbol;Acc:HGNC:20318]	SMOC1	11.617	2.60493	0.312451	8.33708	7.61503e-17	4.51231e-15
ENSG00000240764,3	56097	protocadherin gamma subfamily C, 5 [Source:HGNC Symbol;Acc:HGNC:8718]	PCDHGC5	527.565	-0.656211	0.0787075	-8.33733	7.59849e-17	4.51231e-15
ENSG00000003056,8	4074	mannose-6-phosphate receptor, cation dependent [Source:HGNC Symbol;Acc:HGNC:6752]	M6PR	468.851	0.447715	0.0537517	8.32933	8.13034e-17	4.80323e-15
ENSG00000185896,11	3916	lysosomal associated membrane protein 1 [Source:HGNC Symbol;Acc:HGNC:6499]	LAMP1	1075.88	-0.381661	0.0458379	-8.32631	8.33994e-17	4.91235e-15
ENSG00000146909,8	64434	nucleolar protein with MIF4G domain 1 [Source:HGNC Symbol;Acc:HGNC:13244]	NOM1	415.018	0.419721	0.0504601	8.31788	8.95488e-17	5.25886e-15
ENSG00000128849,10	84952	cingulin like 1 [Source:HGNC Symbol;Acc:HGNC:25931]	CGNL1	199.596	-0.710961	0.0855185	-8.31353	9.28943e-17	5.43914e-15
ENSG00000077063,11	83992	cortactin binding protein 2 [Source:HGNC Symbol;Acc:HGNC:15679]	CTTNBP2	253.776	0.560225	0.0674584	8.30475	1.00029e-16	5.83957e-15
ENSG00000197746,14	5660	prosaposin [Source:HGNC Symbol;Acc:HGNC:9498]	PSAP	4853.82	-0.333702	0.0402496	-8.29081	1.12479e-16	6.54703e-15
ENSG00000150540,14	3176	histamine N-methyltransferase [Source:HGNC Symbol;Acc:HGNC:5028]	HNMT	52.677	1.07828	0.130139	8.2856	1.1752e-16	6.82029e-15
ENSG00000101608,12	10627	myosin light chain 12A [Source:HGNC Symbol;Acc:HGNC:16701]	MYL12A	107.445	-1.05018	0.126759	-8.28484	1.18263e-16	6.8433e-15
ENSG00000176225,14	25914	rotatin [Source:HGNC Symbol;Acc:HGNC:18654]	RTTN	621.678	-0.407145	0.0492297	-8.27032	1.33602e-16	7.7083e-15
ENSG00000204574,13	23	ATP binding cassette subfamily F member 1 [Source:HGNC Symbol;Acc:HGNC:70]	ABCF1	492.027	0.448041	0.0541854	8.26866	1.35472e-16	7.79336e-15
ENSG00000141576,16	114804	ring finger protein 157 [Source:HGNC Symbol;Acc:HGNC:29402]	RNF157	1073.15	-0.369726	0.0447252	-8.26662	1.37809e-16	7.90479e-15
ENSG00000140391,15	10099	tetraspanin 3 [Source:HGNC Symbol;Acc:HGNC:17752]	TSPAN3	1562.24	-0.351916	0.0425856	-8.26374	1.41172e-16	8.07424e-15
ENSG00000124225,16	56937	prostate transmembrane protein, androgen induced 1 [Source:HGNC Symbol;Acc:HGNC:14107]	PMEPA1	76.2609	-1.2069	0.146127	-8.2592	1.46656e-16	8.36366e-15
ENSG00000104415,14	8840	cellular communication network factor 4 [Source:HGNC Symbol;Acc:HGNC:12769]	CCN4	2095.44	-0.381375	0.0462453	-8.24678	1.62719e-16	9.24903e-15
ENSG00000170266,16	2720	galactosidase beta 1 [Source:HGNC Symbol;Acc:HGNC:4298]	GLB1	419.983	-0.455119	0.0551895	-8.24649	1.63119e-16	9.24903e-15
ENSG00000166710,20	567	beta-2-microglobulin [Source:HGNC Symbol;Acc:HGNC:914]	B2M	3302.35	-0.436534	0.0529836	-8.23904	1.73592e-16	9.81465e-15
ENSG00000145087,12	9515	syntaxin binding protein 5 like [Source:HGNC Symbol;Acc:HGNC:30757]	STXBP5L	115.92	-0.900091	0.109291	-8.23571	1.78494e-16	1.0063e-14
ENSG00000152503,9	55521	tripartite motif containing 36 [Source:HGNC Symbol;Acc:HGNC:16280]	TRIM36	308.853	0.648415	0.0787979	8.22883	1.89044e-16	1.06274e-14
ENSG00000136158,12	10253	sprouty RTK signaling antagonist 2 [Source:HGNC Symbol;Acc:HGNC:11270]	SPRY2	1915.8	-0.267804	0.0325736	-8.22151	2.00959e-16	1.12651e-14
ENSG00000132669,13	54453	Ras and Rab interactor 2 [Source:HGNC Symbol;Acc:HGNC:18750]	RIN2	57.0885	-1.14193	0.138969	-8.21719	2.08332e-16	1.16453e-14
ENSG00000159403,18	715	complement C1r [Source:HGNC Symbol;Acc:HGNC:1246]	C1R	119.933	-0.75823	0.0923517	-8.21025	2.20736e-16	1.23039e-14
ENSG00000139364,10	114795	transmembrane protein 132B [Source:HGNC Symbol;Acc:HGNC:29397]	TMEM132B	32.4933	-1.97013	0.240014	-8.2084	2.24153e-16	1.24591e-14
ENSG00000115902,11	6509	solute carrier family 1 member 4 [Source:HGNC Symbol;Acc:HGNC:10942]	SLC1A4	351.599	0.497096	0.0605727	8.20659	2.27556e-16	1.26128e-14
ENSG00000068078,18	2261	fibroblast growth factor receptor 3 [Source:HGNC Symbol;Acc:HGNC:3690]	FGFR3	2772.35	-1.47704	0.180243	-8.1947	2.51224e-16	1.38856e-14
ENSG00000134769,21	1837	dystrobrevin alpha [Source:HGNC Symbol;Acc:HGNC:3057]	DTNA	628.315	-0.429675	0.0524517	-8.19183	2.57282e-16	1.41807e-14
ENSG00000140873,16	170692	ADAM metallopeptidase with thrombospondin type 1 motif 18 [Source:HGNC Symbol;Acc:HGNC:17110]	ADAMTS18	106.559	0.72693	0.0887522	8.19056	2.60018e-16	1.42916e-14
ENSG00000157227,13	4323	matrix metallopeptidase 14 [Source:HGNC Symbol;Acc:HGNC:7160]	MMP14	5851.93	-0.499466	0.0610138	-8.18612	2.69774e-16	1.47866e-14
ENSG00000089177,18	55614	kinesin family member 16B [Source:HGNC Symbol;Acc:HGNC:15869]	KIF16B	62.6265	0.99889	0.122097	8.1811	2.8127e-16	1.5374e-14
ENSG00000198910,14	3897	L1 cell adhesion molecule [Source:HGNC Symbol;Acc:HGNC:6470]	L1CAM	802.866	-0.673112	0.082314	-8.17736	2.90122e-16	1.5814e-14
ENSG00000169908,12	4071	transmembrane 4 L six family member 1 [Source:HGNC Symbol;Acc:HGNC:11853]	TM4SF1	239.98	0.607351	0.0743222	8.17186	3.03668e-16	1.65068e-14
ENSG00000150471,16	23284	adhesion G protein-coupled receptor L3 [Source:HGNC Symbol;Acc:HGNC:20974]	ADGRL3	62.3108	-1.18118	0.144554	-8.17116	3.05429e-16	1.65569e-14
ENSG00000090861,15	16	alanyl-tRNA synthetase [Source:HGNC Symbol;Acc:HGNC:20]	AARS	2782.61	0.397121	0.04863	8.16617	3.18347e-16	1.72099e-14
ENSG00000144668,12	3680	integrin subunit alpha 9 [Source:HGNC Symbol;Acc:HGNC:6145]	ITGA9	26.2245	-1.84166	0.225844	-8.15456	3.50446e-16	1.88935e-14
ENSG00000012963,15	55148	ubiquitin protein ligase E3 component n-recognin 7 (putative) [Source:HGNC Symbol;Acc:HGNC:20344]	UBR7	949.099	0.379209	0.0465789	8.14122	3.91318e-16	2.10395e-14
ENSG00000128268,12	4248	mannosyl (beta-1,4-)-glycoprotein beta-1,4-N-acetylglucosaminyltransferase [Source:HGNC Symbol;Acc:HGNC:7046]	MGAT3	73.8513	-1.12049	0.137842	-8.1288	4.33569e-16	2.32478e-14
ENSG00000172379,21	9915	aryl hydrocarbon receptor nuclear translocator 2 [Source:HGNC Symbol;Acc:HGNC:16876]	ARNT2	819.696	-0.359891	0.044315	-8.1212	4.6158e-16	2.46827e-14
ENSG00000166407,14	4004	LIM domain only 1 [Source:HGNC Symbol;Acc:HGNC:6641]	LMO1	66.7606	-1.3811	0.17017	-8.11597	4.819e-16	2.56996e-14
ENSG00000173918,15	114897	C1q and TNF related 1 [Source:HGNC Symbol;Acc:HGNC:14324]	C1QTNF1	69.8798	-1.60286	0.197556	-8.11346	4.91977e-16	2.61663e-14
ENSG00000167995,16	7439	bestrophin 1 [Source:HGNC Symbol;Acc:HGNC:12703]	BEST1	2064.31	-0.399374	0.0492275	-8.11282	4.94568e-16	2.62334e-14
ENSG00000009830,11	29954	protein O-mannosyltransferase 2 [Source:HGNC Symbol;Acc:HGNC:19743]	POMT2	367.934	0.465364	0.0574194	8.10465	5.2896e-16	2.79824e-14
ENSG00000148843,15	22984	programmed cell death 11 [Source:HGNC Symbol;Acc:HGNC:13408]	PDCD11	407.297	0.426603	0.0526602	8.10105	5.44854e-16	2.87461e-14
ENSG00000163873,10	2899	glutamate ionotropic receptor kainate type subunit 3 [Source:HGNC Symbol;Acc:HGNC:4581]	GRIK3	632.612	-0.413133	0.0510032	-8.10014	5.48969e-16	2.8886e-14
ENSG00000124126,14	57580	phosphatidylinositol-3,4,5-trisphosphate dependent Rac exchange factor 1 [Source:HGNC Symbol;Acc:HGNC:32594]	PREX1	2022.81	-0.459111	0.0567866	-8.08484	6.22467e-16	3.26663e-14
ENSG00000142494,13	55244	solute carrier family 47 member 1 [Source:HGNC Symbol;Acc:HGNC:25588]	SLC47A1	174.937	-0.578023	0.0715335	-8.08044	6.45323e-16	3.37759e-14
ENSG00000243156,9	57553	microtubule associated monooxygenase, calponin and LIM domain containing 3 [Source:HGNC Symbol;Acc:HGNC:24694]	MICAL3	338.678	0.450039	0.05581	8.06376	7.39822e-16	3.86195e-14
ENSG00000130164,13	3949	low density lipoprotein receptor [Source:HGNC Symbol;Acc:HGNC:6547]	LDLR	1207.53	-0.352422	0.043733	-8.05851	7.72318e-16	4.02095e-14
ENSG00000197093,11	79690	galactose-3-O-sulfotransferase 4 [Source:HGNC Symbol;Acc:HGNC:24145]	GAL3ST4	159.017	0.608696	0.0755457	8.05732	7.79858e-16	4.04952e-14
ENSG00000168874,13	84913	atonal bHLH transcription factor 8 [Source:HGNC Symbol;Acc:HGNC:24126]	ATOH8	88.3065	-0.911534	0.11324	-8.04958	8.30762e-16	4.30252e-14
ENSG00000137693,14	10413	Yes associated protein 1 [Source:HGNC Symbol;Acc:HGNC:16262]	YAP1	463.186	0.551331	0.0685007	8.04855	8.3781e-16	4.32766e-14
ENSG00000124541,7	88745	ribosomal RNA processing 36 [Source:HGNC Symbol;Acc:HGNC:21374]	RRP36	266.038	0.49185	0.061195	8.03743	9.17432e-16	4.72657e-14
ENSG00000101670,12	9388	lipase G, endothelial type [Source:HGNC Symbol;Acc:HGNC:6623]	LIPG	63.1712	1.17097	0.145757	8.03371	9.45658e-16	4.8593e-14
ENSG00000164649,20	55536	cell division cycle associated 7 like [Source:HGNC Symbol;Acc:HGNC:30777]	CDCA7L	1434.71	0.346647	0.0431967	8.02486	1.0164e-15	5.20926e-14
ENSG00000124145,6	6385	syndecan 4 [Source:HGNC Symbol;Acc:HGNC:10661]	SDC4	400.424	-0.469698	0.0585651	-8.0201	1.05656e-15	5.40104e-14
ENSG00000125630,15	84172	RNA polymerase I subunit B [Source:HGNC Symbol;Acc:HGNC:20454]	POLR1B	289.904	0.505987	0.0631086	8.01772	1.0773e-15	5.49284e-14
ENSG00000196639,6	3269	histamine receptor H1 [Source:HGNC Symbol;Acc:HGNC:5182]	HRH1	180.676	-0.593907	0.0741999	-8.00414	1.203e-15	6.11793e-14
ENSG00000110002,16	4013	von Willebrand factor A domain containing 5A [Source:HGNC Symbol;Acc:HGNC:6658]	VWA5A	214.17	-0.660294	0.0825418	-7.99951	1.24911e-15	6.33609e-14
ENSG00000184144,12	6900	contactin 2 [Source:HGNC Symbol;Acc:HGNC:2172]	CNTN2	976.714	-0.415753	0.052025	-7.99142	1.33397e-15	6.74918e-14
ENSG00000010292,13	9918	non-SMC condensin I complex subunit D2 [Source:HGNC Symbol;Acc:HGNC:24305]	NCAPD2	2246.7	0.294294	0.0369008	7.97528	1.5204e-15	7.67279e-14
ENSG00000182771,19	2894	glutamate ionotropic receptor delta type subunit 1 [Source:HGNC Symbol;Acc:HGNC:4575]	GRID1	86.8077	-0.944322	0.118411	-7.97494	1.5246e-15	7.67433e-14
ENSG00000156697,13	10813	UTP14A small subunit processome component [Source:HGNC Symbol;Acc:HGNC:10665]	UTP14A	228.39	0.553932	0.0695392	7.96574	1.64235e-15	8.22509e-14
ENSG00000197961,11	7675	zinc finger protein 121 [Source:HGNC Symbol;Acc:HGNC:12904]	ZNF121	428.127	0.476392	0.059803	7.96603	1.63849e-15	8.22509e-14
ENSG00000159228,13	873	carbonyl reductase 1 [Source:HGNC Symbol;Acc:HGNC:1548]	CBR1	428.568	-0.417158	0.0524661	-7.951	1.8501e-15	9.24205e-14
ENSG00000198393,8	7574	zinc finger protein 26 [Source:HGNC Symbol;Acc:HGNC:13053]	ZNF26	195.593	0.599942	0.0754881	7.94752	1.90289e-15	9.48177e-14
ENSG00000144057,15	84620	ST6 beta-galactoside alpha-2,6-sialyltransferase 2 [Source:HGNC Symbol;Acc:HGNC:10861]	ST6GAL2	75.6849	0.814674	0.102548	7.94431	1.95273e-15	9.70559e-14
ENSG00000103485,19	23475	quinolinate phosphoribosyltransferase [Source:HGNC Symbol;Acc:HGNC:9755]	QPRT	54.7158	-0.985899	0.124274	-7.93326	2.13473e-15	1.05836e-13
ENSG00000065911,12	10797	methylenetetrahydrofolate dehydrogenase (NADP+ dependent) 2, methenyltetrahydrofolate cyclohydrolase [Source:HGNC Symbol;Acc:HGNC:7434]	MTHFD2	788.234	0.47777	0.0602958	7.92377	2.30413e-15	1.13948e-13
ENSG00000161011,20	8878	sequestosome 1 [Source:HGNC Symbol;Acc:HGNC:11280]	SQSTM1	1149.96	-0.502684	0.063454	-7.92203	2.3367e-15	1.15269e-13
ENSG00000135905,19	55619	dedicator of cytokinesis 10 [Source:HGNC Symbol;Acc:HGNC:23479]	DOCK10	48.803	0.9071	0.114516	7.92118	2.35268e-15	1.15768e-13
ENSG00000111142,14	10988	methionyl aminopeptidase 2 [Source:HGNC Symbol;Acc:HGNC:16672]	METAP2	883.863	0.499161	0.0630582	7.91587	2.45523e-15	1.20514e-13
ENSG00000128714,6	3239	homeobox D13 [Source:HGNC Symbol;Acc:HGNC:5136]	HOXD13	96.0136	0.771338	0.0974621	7.91423	2.48782e-15	1.21811e-13
ENSG00000166033,13	5654	HtrA serine peptidase 1 [Source:HGNC Symbol;Acc:HGNC:9476]	HTRA1	723.17	-0.364415	0.0460802	-7.90827	2.60989e-15	1.27462e-13
ENSG00000197324,9	26020	LDL receptor related protein 10 [Source:HGNC Symbol;Acc:HGNC:14553]	LRP10	568.242	-0.567175	0.071722	-7.90797	2.61616e-15	1.27462e-13
ENSG00000182247,10	7325	ubiquitin conjugating enzyme E2 E2 [Source:HGNC Symbol;Acc:HGNC:12478]	UBE2E2	93.1059	-0.918022	0.116107	-7.90666	2.64378e-15	1.2849e-13
ENSG00000149809,15	7108	transmembrane 7 superfamily member 2 [Source:HGNC Symbol;Acc:HGNC:11863]	TM7SF2	206.671	0.782969	0.099097	7.90103	2.76602e-15	1.34101e-13
ENSG00000082497,12	56256	SERTA domain containing 4 [Source:HGNC Symbol;Acc:HGNC:25236]	SERTAD4	11.4686	2.45888	0.311277	7.89932	2.80424e-15	1.35388e-13
ENSG00000186088,16	54103	gamma-secretase activating protein [Source:HGNC Symbol;Acc:HGNC:28042]	GSAP	197.609	-0.734747	0.093015	-7.89923	2.80628e-15	1.35388e-13
ENSG00000058404,20	816	calcium/calmodulin dependent protein kinase II beta [Source:HGNC Symbol;Acc:HGNC:1461]	CAMK2B	169.987	-0.959875	0.121565	-7.89597	2.88068e-15	1.38638e-13
ENSG00000113140,11	6678	secreted protein acidic and cysteine rich [Source:HGNC Symbol;Acc:HGNC:11219]	SPARC	10703.4	-0.284976	0.0360973	-7.89466	2.91104e-15	1.39758e-13
ENSG00000178053,19	4291	myeloid leukemia factor 1 [Source:HGNC Symbol;Acc:HGNC:7125]	MLF1	137.159	-0.854245	0.108274	-7.88962	3.03105e-15	1.45167e-13
ENSG00000138061,12	1545	cytochrome P450 family 1 subfamily B member 1 [Source:HGNC Symbol;Acc:HGNC:2597]	CYP1B1	14.8479	2.03044	0.257369	7.88922	3.04074e-15	1.45278e-13
ENSG00000124772,12	57699	copine 5 [Source:HGNC Symbol;Acc:HGNC:2318]	CPNE5	157.028	-0.803401	0.101926	-7.8822	3.21664e-15	1.53311e-13
ENSG00000116161,18	27101	calcyclin binding protein [Source:HGNC Symbol;Acc:HGNC:30423]	CACYBP	351.771	0.492378	0.0625765	7.86841	3.59182e-15	1.7078e-13
ENSG00000136425,14	10518	calcium and integrin binding family member 2 [Source:HGNC Symbol;Acc:HGNC:24579]	CIB2	109.984	-0.771792	0.0981277	-7.86519	3.68552e-15	1.74814e-13
ENSG00000109107,14	230	aldolase, fructose-bisphosphate C [Source:HGNC Symbol;Acc:HGNC:418]	ALDOC	94.0503	-1.9964	0.253989	-7.86019	3.83558e-15	1.81495e-13
ENSG00000154511,12	388650	divergent protein kinase domain 1A [Source:HGNC Symbol;Acc:HGNC:32213]	DIPK1A	112.79	0.763071	0.0972057	7.85007	4.15819e-15	1.9629e-13
ENSG00000087365,16	10992	splicing factor 3b subunit 2 [Source:HGNC Symbol;Acc:HGNC:10769]	SF3B2	1912	0.31768	0.040471	7.84957	4.17467e-15	1.96598e-13
ENSG00000064300,9	4804	nerve growth factor receptor [Source:HGNC Symbol;Acc:HGNC:7809]	NGFR	268.771	-1.31292	0.167339	-7.84589	4.299e-15	2.01971e-13
ENSG00000170515,14	5036	proliferation-associated 2G4 [Source:HGNC Symbol;Acc:HGNC:8550]	PA2G4	896.497	0.382269	0.048736	7.84366	4.37603e-15	2.05102e-13
ENSG00000097046,13	8317	cell division cycle 7 [Source:HGNC Symbol;Acc:HGNC:1745]	CDC7	640.43	0.431781	0.0550642	7.8414	4.45568e-15	2.07847e-13
ENSG00000115232,14	3676	integrin subunit alpha 4 [Source:HGNC Symbol;Acc:HGNC:6140]	ITGA4	140.067	-0.582903	0.0743352	-7.84155	4.45023e-15	2.07847e-13
ENSG00000071994,11	5134	programmed cell death 2 [Source:HGNC Symbol;Acc:HGNC:8762]	PDCD2	338.507	0.499798	0.0638324	7.82984	4.88488e-15	2.27331e-13
ENSG00000129151,9	8424	gamma-butyrobetaine hydroxylase 1 [Source:HGNC Symbol;Acc:HGNC:964]	BBOX1	33.5904	1.37367	0.17557	7.82405	5.11517e-15	2.37488e-13
ENSG00000116205,14	127428	transcription elongation factor A N-terminal and central domain containing 2 [Source:HGNC Symbol;Acc:HGNC:26494]	TCEANC2	192.957	0.591085	0.0757035	7.80789	5.81535e-15	2.69363e-13
ENSG00000189299,7	139628	forkhead box R2 [Source:HGNC Symbol;Acc:HGNC:30469]	FOXR2	6.14778	3.7795	0.484495	7.80091	6.14638e-15	2.84029e-13
ENSG00000111602,12	8914	timeless circadian regulator [Source:HGNC Symbol;Acc:HGNC:11813]	TIMELESS	1167.51	0.308946	0.0396493	7.79196	6.59795e-15	3.04184e-13
ENSG00000176490,5	148252	DIRAS family GTPase 1 [Source:HGNC Symbol;Acc:HGNC:19127]	DIRAS1	452.386	-0.485492	0.0624414	-7.77516	7.5354e-15	3.46593e-13
ENSG00000172269,19	1798	dolichyl-phosphate N-acetylglucosaminephosphotransferase 1 [Source:HGNC Symbol;Acc:HGNC:2995]	DPAGT1	217.651	0.50885	0.0655141	7.76703	8.03487e-15	3.68707e-13
ENSG00000146216,13	84630	tau tubulin kinase 1 [Source:HGNC Symbol;Acc:HGNC:19140]	TTBK1	58.9696	-1.60693	0.207325	-7.75078	9.13325e-15	4.18138e-13
ENSG00000182732,18	9628	regulator of G protein signaling 6 [Source:HGNC Symbol;Acc:HGNC:10002]	RGS6	319.693	-0.607812	0.0784715	-7.74564	9.51004e-15	4.3438e-13
ENSG00000171385,9	3752	potassium voltage-gated channel subfamily D member 3 [Source:HGNC Symbol;Acc:HGNC:6239]	KCND3	549.915	-0.539203	0.0696172	-7.74525	9.53972e-15	4.34729e-13
ENSG00000004866,20	7982	suppression of tumorigenicity 7 [Source:HGNC Symbol;Acc:HGNC:11351]	ST7	257.738	0.474195	0.0612499	7.74198	9.78828e-15	4.45028e-13
ENSG00000171533,11	4135	microtubule associated protein 6 [Source:HGNC Symbol;Acc:HGNC:6868]	MAP6	132.48	-0.80793	0.104366	-7.74133	9.83834e-15	4.46276e-13
ENSG00000104267,10	760	carbonic anhydrase 2 [Source:HGNC Symbol;Acc:HGNC:1373]	CA2	30.1768	-1.44654	0.186919	-7.73889	1.00288e-14	4.53874e-13
ENSG00000106070,19	2887	growth factor receptor bound protein 10 [Source:HGNC Symbol;Acc:HGNC:4564]	GRB10	2050.77	-0.294389	0.0380442	-7.73806	1.00944e-14	4.55797e-13
ENSG00000204624,8	57540	dispatched RND transporter family member 3 [Source:HGNC Symbol;Acc:HGNC:29251]	DISP3	191.947	-1.14812	0.148513	-7.73073	1.06935e-14	4.81744e-13
ENSG00000076554,15	7163	tumor protein D52 [Source:HGNC Symbol;Acc:HGNC:12005]	TPD52	105.897	1.04982	0.135933	7.72309	1.13542e-14	5.10345e-13
ENSG00000085840,13	4998	origin recognition complex subunit 1 [Source:HGNC Symbol;Acc:HGNC:8487]	ORC1	240.268	0.511353	0.0662355	7.72022	1.1613e-14	5.2079e-13
ENSG00000011426,11	54443	anillin actin binding protein [Source:HGNC Symbol;Acc:HGNC:14082]	ANLN	1741.41	0.399788	0.0517949	7.71868	1.17543e-14	5.25933e-13
ENSG00000162458,13	54751	filamin binding LIM protein 1 [Source:HGNC Symbol;Acc:HGNC:24686]	FBLIM1	121.258	-0.762215	0.0987592	-7.71791	1.18249e-14	5.27069e-13
ENSG00000234741,8	60674	growth arrest specific 5 [Source:HGNC Symbol;Acc:HGNC:16355]	GAS5	918.98	0.374727	0.0485535	7.71783	1.18331e-14	5.27069e-13
ENSG00000161010,15	51149	MRN complex interacting protein [Source:HGNC Symbol;Acc:HGNC:30817]	MRNIP	585.936	-0.445111	0.0576764	-7.71739	1.18734e-14	5.2767e-13
ENSG00000196793,13	8187	zinc finger protein 239 [Source:HGNC Symbol;Acc:HGNC:13031]	ZNF239	57.7505	0.996709	0.129236	7.71229	1.23577e-14	5.4796e-13
ENSG00000184792,16	23762	oxysterol binding protein 2 [Source:HGNC Symbol;Acc:HGNC:8504]	OSBP2	273.333	-0.652766	0.0846705	-7.70948	1.26327e-14	5.58898e-13
ENSG00000125945,15	80818	zinc finger protein 436 [Source:HGNC Symbol;Acc:HGNC:20814]	ZNF436	662.5	-0.386538	0.0501953	-7.7007	1.35327e-14	5.97376e-13
ENSG00000162736,17	23385	nicastrin [Source:HGNC Symbol;Acc:HGNC:17091]	NCSTN	891.231	-0.34678	0.0451023	-7.68874	1.48587e-14	6.54445e-13
ENSG00000249835,2	NA	VCAN antisense RNA 1 [Source:HGNC Symbol;Acc:HGNC:40163]	VCAN-AS1	144.963	0.634253	0.0825222	7.68584	1.51993e-14	6.67958e-13
ENSG00000146426,18	26230	T cell lymphoma invasion and metastasis 2 [Source:HGNC Symbol;Acc:HGNC:11806]	TIAM2	282.669	0.49627	0.0646938	7.67105	1.70588e-14	7.4801e-13
ENSG00000156140,10	9508	ADAM metallopeptidase with thrombospondin type 1 motif 3 [Source:HGNC Symbol;Acc:HGNC:219]	ADAMTS3	56.0763	-0.97162	0.126678	-7.66999	1.72009e-14	7.52568e-13
ENSG00000176046,8	26471	nuclear protein 1, transcriptional regulator [Source:HGNC Symbol;Acc:HGNC:29990]	NUPR1	239.264	0.839865	0.10959	7.66371	1.80639e-14	7.88575e-13
ENSG00000130517,14	54858	pyroglutamyl-peptidase I [Source:HGNC Symbol;Acc:HGNC:13568]	PGPEP1	744.05	-0.371093	0.048442	-7.66056	1.85122e-14	8.06363e-13
ENSG00000137203,12	7020	transcription factor AP-2 alpha [Source:HGNC Symbol;Acc:HGNC:11742]	TFAP2A	256.468	0.452473	0.0590695	7.66	1.85928e-14	8.0809e-13
ENSG00000170017,12	214	activated leukocyte cell adhesion molecule [Source:HGNC Symbol;Acc:HGNC:400]	ALCAM	29.8599	1.21777	0.159115	7.65337	1.95774e-14	8.49016e-13
ENSG00000116830,12	8458	transcription termination factor 2 [Source:HGNC Symbol;Acc:HGNC:12398]	TTF2	465.608	0.376889	0.0492914	7.64613	2.07115e-14	8.95091e-13
ENSG00000184465,16	253769	WD repeat domain 27 [Source:HGNC Symbol;Acc:HGNC:21248]	WDR27	291.12	0.696166	0.0910495	7.64601	2.07306e-14	8.95091e-13
ENSG00000172461,11	10690	fucosyltransferase 9 [Source:HGNC Symbol;Acc:HGNC:4020]	FUT9	22.4593	1.43722	0.187992	7.64508	2.08807e-14	8.99604e-13
ENSG00000164294,14	493869	glutathione peroxidase 8 (putative) [Source:HGNC Symbol;Acc:HGNC:33100]	GPX8	155.264	0.683637	0.0894495	7.64271	2.127e-14	9.14378e-13
ENSG00000125962,14	64860	armadillo repeat containing X-linked 5 [Source:HGNC Symbol;Acc:HGNC:25772]	ARMCX5	144.096	0.663905	0.0869124	7.63879	2.19279e-14	9.40612e-13
ENSG00000126746,17	171017	zinc finger protein 384 [Source:HGNC Symbol;Acc:HGNC:11955]	ZNF384	596.749	0.364418	0.0477523	7.63141	2.32192e-14	9.93844e-13
ENSG00000108592,17	117246	FtsJ RNA 2'-O-methyltransferase 3 [Source:HGNC Symbol;Acc:HGNC:17136]	FTSJ3	785.372	0.349848	0.0459722	7.60998	2.74128e-14	1.1708e-12
ENSG00000140575,13	8826	IQ motif containing GTPase activating protein 1 [Source:HGNC Symbol;Acc:HGNC:6110]	IQGAP1	3386.08	-0.428468	0.0563172	-7.60812	2.78108e-14	1.18523e-12
ENSG00000184787,19	7327	ubiquitin conjugating enzyme E2 G2 [Source:HGNC Symbol;Acc:HGNC:12483]	UBE2G2	980.818	0.299906	0.0394265	7.60671	2.81153e-14	1.19563e-12
ENSG00000121966,6	7852	C-X-C motif chemokine receptor 4 [Source:HGNC Symbol;Acc:HGNC:2561]	CXCR4	260.84	0.604752	0.0795964	7.59773	3.01377e-14	1.27613e-12
ENSG00000184445,12	9735	kinetochore associated 1 [Source:HGNC Symbol;Acc:HGNC:17255]	KNTC1	1067.79	0.440181	0.0579353	7.5978	3.0121e-14	1.27613e-12
ENSG00000197956,10	6277	S100 calcium binding protein A6 [Source:HGNC Symbol;Acc:HGNC:10496]	S100A6	3231.3	-0.554547	0.0730518	-7.59114	3.17106e-14	1.33986e-12
ENSG00000141753,7	3487	insulin like growth factor binding protein 4 [Source:HGNC Symbol;Acc:HGNC:5473]	IGFBP4	110.606	0.82721	0.109023	7.58751	3.26116e-14	1.37498e-12
ENSG00000106263,18	8662	eukaryotic translation initiation factor 3 subunit B [Source:HGNC Symbol;Acc:HGNC:3280]	EIF3B	1934.03	0.241498	0.031853	7.58165	3.41186e-14	1.43545e-12
ENSG00000227195,11	NA	MIR663A host gene [Source:HGNC Symbol;Acc:HGNC:27662]	MIR663AHG	7.64592	2.69474	0.355476	7.58066	3.43801e-14	1.44338e-12
ENSG00000140993,11	91151	tigger transposable element derived 7 [Source:HGNC Symbol;Acc:HGNC:18331]	TIGD7	215.38	0.576427	0.0760994	7.57466	3.60078e-14	1.50851e-12
ENSG00000099953,10	4320	matrix metallopeptidase 11 [Source:HGNC Symbol;Acc:HGNC:7157]	MMP11	91.7959	-0.891923	0.117764	-7.57384	3.62337e-14	1.51475e-12
ENSG00000165732,13	9188	DExD-box helicase 21 [Source:HGNC Symbol;Acc:HGNC:2744]	DDX21	939.483	0.442324	0.0584072	7.57311	3.64383e-14	1.52009e-12
ENSG00000026103,22	355	Fas cell surface death receptor [Source:HGNC Symbol;Acc:HGNC:11920]	FAS	76.3271	0.73126	0.0965794	7.5716	3.6866e-14	1.53468e-12
ENSG00000239665,8	NA	novel transcript	AL157392,3	397.878	0.477973	0.0631559	7.56814	3.78616e-14	1.57281e-12
ENSG00000150995,19	3708	inositol 1,4,5-trisphosphate receptor type 1 [Source:HGNC Symbol;Acc:HGNC:6180]	ITPR1	501.13	0.623639	0.0824079	7.5677	3.79879e-14	1.57474e-12
ENSG00000089737,17	57062	DEAD-box helicase 24 [Source:HGNC Symbol;Acc:HGNC:13266]	DDX24	1504	0.30683	0.0405569	7.56541	3.8665e-14	1.59945e-12
ENSG00000197548,12	10533	autophagy related 7 [Source:HGNC Symbol;Acc:HGNC:16935]	ATG7	1047.95	-0.268244	0.0354839	-7.55959	4.04355e-14	1.66919e-12
ENSG00000144580,13	9125	CCR4-NOT transcription complex subunit 9 [Source:HGNC Symbol;Acc:HGNC:10445]	CNOT9	512.695	0.373686	0.0494561	7.55592	4.15904e-14	1.71328e-12
ENSG00000136718,9	92856	IMP U3 small nucleolar ribonucleoprotein 4 [Source:HGNC Symbol;Acc:HGNC:30856]	IMP4	282.174	0.489407	0.0648245	7.54972	4.362e-14	1.79315e-12
ENSG00000092421,16	57556	semaphorin 6A [Source:HGNC Symbol;Acc:HGNC:10738]	SEMA6A	1216.33	-0.277584	0.036804	-7.54221	4.6208e-14	1.89558e-12
ENSG00000112902,12	9037	semaphorin 5A [Source:HGNC Symbol;Acc:HGNC:10736]	SEMA5A	960.977	-0.420708	0.0557977	-7.53989	4.70361e-14	1.92555e-12
ENSG00000105993,15	10049	DnaJ heat shock protein family (Hsp40) member B6 [Source:HGNC Symbol;Acc:HGNC:14888]	DNAJB6	493.294	0.384808	0.0510431	7.53888	4.74018e-14	1.93651e-12
ENSG00000146376,11	93663	Rho GTPase activating protein 18 [Source:HGNC Symbol;Acc:HGNC:21035]	ARHGAP18	70.773	1.02552	0.136284	7.52492	5.27528e-14	2.15066e-12
ENSG00000091490,11	23231	SEL1L family member 3 [Source:HGNC Symbol;Acc:HGNC:29108]	SEL1L3	545.78	-0.48688	0.0647386	-7.5207	5.44831e-14	2.21662e-12
ENSG00000255819,7	NA	KLRC4-KLRK1 readthrough [Source:HGNC Symbol;Acc:HGNC:48357]	KLRC4-KLRK1	6.72555	3.31954	0.441475	7.51919	5.51151e-14	2.23772e-12
ENSG00000144021,3	9391	cytosolic iron-sulfur assembly component 1 [Source:HGNC Symbol;Acc:HGNC:14280]	CIAO1	644.441	0.310769	0.0413392	7.51755	5.58124e-14	2.26138e-12
ENSG00000072110,13	87	actinin alpha 1 [Source:HGNC Symbol;Acc:HGNC:163]	ACTN1	1251.65	0.396976	0.0528359	7.51338	5.76202e-14	2.32984e-12
ENSG00000158164,7	11013	thymosin beta 15a [Source:HGNC Symbol;Acc:HGNC:30744]	TMSB15A	218.255	0.572234	0.0761831	7.51129	5.85464e-14	2.36245e-12
ENSG00000173273,16	8658	tankyrase [Source:HGNC Symbol;Acc:HGNC:11941]	TNKS	1826.92	-0.300851	0.0400645	-7.50916	5.95063e-14	2.39628e-12
ENSG00000010810,17	2534	FYN proto-oncogene, Src family tyrosine kinase [Source:HGNC Symbol;Acc:HGNC:4037]	FYN	1692.89	0.283143	0.0377143	7.50759	6.02252e-14	2.42029e-12
ENSG00000173402,11	1605	dystroglycan 1 [Source:HGNC Symbol;Acc:HGNC:2666]	DAG1	4242.44	-0.36353	0.0484618	-7.50138	6.31491e-14	2.53264e-12
ENSG00000111247,14	10635	RAD51 associated protein 1 [Source:HGNC Symbol;Acc:HGNC:16956]	RAD51AP1	430.218	0.503633	0.0671574	7.4993	6.41593e-14	2.56794e-12
ENSG00000131016,17	9590	A-kinase anchoring protein 12 [Source:HGNC Symbol;Acc:HGNC:370]	AKAP12	607.927	-0.803587	0.107294	-7.4896	6.90851e-14	2.75949e-12
ENSG00000078804,13	58476	tumor protein p53 inducible nuclear protein 2 [Source:HGNC Symbol;Acc:HGNC:16104]	TP53INP2	167.599	-0.699514	0.0934764	-7.48332	7.24693e-14	2.88881e-12
ENSG00000130066,16	6303	spermidine/spermine N1-acetyltransferase 1 [Source:HGNC Symbol;Acc:HGNC:10540]	SAT1	224.647	-0.653808	0.0873805	-7.48231	7.30259e-14	2.90514e-12
ENSG00000235159,1	NA	novel transcript	AL121672,2	10.5711	2.33596	0.312317	7.47944	7.46385e-14	2.96332e-12
ENSG00000183196,10	4166	carbohydrate sulfotransferase 6 [Source:HGNC Symbol;Acc:HGNC:6938]	CHST6	126.667	-0.758297	0.101451	-7.47451	7.74933e-14	3.07048e-12
ENSG00000081818,4	56131	protocadherin beta 4 [Source:HGNC Symbol;Acc:HGNC:8689]	PCDHB4	214.815	-0.507555	0.0679137	-7.47354	7.80673e-14	3.08702e-12
ENSG00000132970,14	10810	WASP family member 3 [Source:HGNC Symbol;Acc:HGNC:12734]	WASF3	555.474	-0.412133	0.05515	-7.47295	7.84175e-14	3.09467e-12
ENSG00000147852,16	7436	very low density lipoprotein receptor [Source:HGNC Symbol;Acc:HGNC:12698]	VLDLR	327.376	-0.655448	0.0877312	-7.47109	7.95338e-14	3.13246e-12
ENSG00000116962,15	4811	nidogen 1 [Source:HGNC Symbol;Acc:HGNC:7821]	NID1	29.7676	-1.24362	0.166495	-7.46941	8.05547e-14	3.16635e-12
ENSG00000008394,13	4257	microsomal glutathione S-transferase 1 [Source:HGNC Symbol;Acc:HGNC:7061]	MGST1	11.558	2.28643	0.30612	7.46905	8.07737e-14	3.16864e-12
ENSG00000169230,10	27166	PRELI domain containing 1 [Source:HGNC Symbol;Acc:HGNC:30255]	PRELID1	377.677	0.482936	0.0646816	7.46637	8.24381e-14	3.22752e-12
ENSG00000104112,9	29106	secretogranin III [Source:HGNC Symbol;Acc:HGNC:13707]	SCG3	327.685	-0.503133	0.0674	-7.46488	8.33744e-14	3.25771e-12
ENSG00000185127,6	387263	chromosome 6 open reading frame 120 [Source:HGNC Symbol;Acc:HGNC:21247]	C6orf120	145.845	0.628903	0.0842528	7.46447	8.36363e-14	3.26148e-12
ENSG00000110917,8	9761	malectin [Source:HGNC Symbol;Acc:HGNC:28973]	MLEC	2146.21	0.3016	0.0404145	7.46266	8.47901e-14	3.29996e-12
ENSG00000234745,11	3106	major histocompatibility complex, class I, B [Source:HGNC Symbol;Acc:HGNC:4932]	HLA-B	486.649	-0.604133	0.0810046	-7.45801	8.78406e-14	3.41195e-12
ENSG00000112312,10	51053	geminin DNA replication inhibitor [Source:HGNC Symbol;Acc:HGNC:17493]	GMNN	262.789	0.440934	0.0592891	7.43702	1.02979e-13	3.99212e-12
ENSG00000140450,9	91947	arrestin domain containing 4 [Source:HGNC Symbol;Acc:HGNC:28087]	ARRDC4	215.959	0.69037	0.0928939	7.43181	1.07118e-13	4.14443e-12
ENSG00000144285,21	6323	sodium voltage-gated channel alpha subunit 1 [Source:HGNC Symbol;Acc:HGNC:10585]	SCN1A	53.3682	-1.23094	0.165722	-7.42774	1.10467e-13	4.26563e-12
ENSG00000076356,7	5362	plexin A2 [Source:HGNC Symbol;Acc:HGNC:9100]	PLXNA2	149.186	0.592453	0.0799644	7.40896	1.27292e-13	4.9057e-12
ENSG00000139641,12	23344	extended synaptotagmin 1 [Source:HGNC Symbol;Acc:HGNC:29534]	ESYT1	592.82	0.444065	0.0599464	7.40769	1.28514e-13	4.94314e-12
ENSG00000048991,16	23518	R3H domain containing 1 [Source:HGNC Symbol;Acc:HGNC:9757]	R3HDM1	409.676	0.399877	0.0540455	7.39889	1.37332e-13	5.27205e-12
ENSG00000187446,12	11261	calcineurin like EF-hand protein 1 [Source:HGNC Symbol;Acc:HGNC:17433]	CHP1	447.705	-0.439477	0.0594292	-7.39497	1.41438e-13	5.41915e-12
ENSG00000135069,14	29968	phosphoserine aminotransferase 1 [Source:HGNC Symbol;Acc:HGNC:19129]	PSAT1	1165.27	0.439869	0.059524	7.38977	1.47086e-13	5.62462e-12
ENSG00000272356,1	NA	novel transcript, antisense to REV3L	AL080317,2	184.649	0.541591	0.0733683	7.38181	1.56152e-13	5.95976e-12
ENSG00000139946,10	57161	pellino E3 ubiquitin protein ligase family member 2 [Source:HGNC Symbol;Acc:HGNC:8828]	PELI2	136.085	-0.863757	0.117109	-7.37569	1.63494e-13	6.22793e-12
ENSG00000101958,14	2742	glycine receptor alpha 2 [Source:HGNC Symbol;Acc:HGNC:4327]	GLRA2	115.658	-1.00067	0.135741	-7.37189	1.68221e-13	6.39563e-12
ENSG00000105514,8	9545	RAB3D, member RAS oncogene family [Source:HGNC Symbol;Acc:HGNC:9779]	RAB3D	186.749	-0.578826	0.0786729	-7.35737	1.87563e-13	7.11731e-12
ENSG00000164742,16	107	adenylate cyclase 1 [Source:HGNC Symbol;Acc:HGNC:232]	ADCY1	120.418	-0.677593	0.0921862	-7.35026	1.97819e-13	7.49206e-12
ENSG00000043143,20	23338	jade family PHD finger 2 [Source:HGNC Symbol;Acc:HGNC:22984]	JADE2	255.509	-0.601878	0.0819738	-7.34232	2.09923e-13	7.93525e-12
ENSG00000100577,19	2954	glutathione S-transferase zeta 1 [Source:HGNC Symbol;Acc:HGNC:4643]	GSTZ1	186.716	0.56921	0.0775305	7.34176	2.10809e-13	7.95352e-12
ENSG00000105971,15	858	caveolin 2 [Source:HGNC Symbol;Acc:HGNC:1528]	CAV2	37.4323	1.3343	0.181826	7.33837	2.16214e-13	8.14185e-12
ENSG00000163346,17	57326	PBX homeobox interacting protein 1 [Source:HGNC Symbol;Acc:HGNC:21199]	PBXIP1	201.28	-0.647401	0.0885853	-7.30822	2.70707e-13	1.01744e-11
ENSG00000227051,6	56967	chromosome 14 open reading frame 132 [Source:HGNC Symbol;Acc:HGNC:20346]	C14orf132	144.996	-0.575753	0.0788786	-7.29923	2.89424e-13	1.08573e-11
ENSG00000107249,23	169792	GLIS family zinc finger 3 [Source:HGNC Symbol;Acc:HGNC:28510]	GLIS3	106.729	-0.752253	0.103095	-7.2967	2.94904e-13	1.10418e-11
ENSG00000004399,12	23129	plexin D1 [Source:HGNC Symbol;Acc:HGNC:9107]	PLXND1	375.881	-0.678891	0.093053	-7.29574	2.97017e-13	1.10789e-11
ENSG00000041515,16	23026	myosin XVI [Source:HGNC Symbol;Acc:HGNC:29822]	MYO16	42.6237	-1.59338	0.218398	-7.29574	2.97015e-13	1.10789e-11
ENSG00000111371,16	81539	solute carrier family 38 member 1 [Source:HGNC Symbol;Acc:HGNC:13447]	SLC38A1	2052.13	0.447822	0.06139	7.29471	2.99294e-13	1.11428e-11
ENSG00000179240,11	100506127	GVQW motif containing 3 [Source:HGNC Symbol;Acc:HGNC:51239]	GVQW3	198.019	0.632641	0.0867629	7.29161	3.06263e-13	1.13808e-11
ENSG00000106603,18	55744	cytochrome c oxidase assembly factor 1 homolog [Source:HGNC Symbol;Acc:HGNC:21868]	COA1	610.675	0.337539	0.046312	7.28838	3.13715e-13	1.16358e-11
ENSG00000152402,10	2977	guanylate cyclase 1 soluble subunit alpha 2 [Source:HGNC Symbol;Acc:HGNC:4684]	GUCY1A2	229.963	0.872737	0.119755	7.28771	3.15268e-13	1.16714e-11
ENSG00000121039,10	157506	retinol dehydrogenase 10 [Source:HGNC Symbol;Acc:HGNC:19975]	RDH10	171.768	-0.620165	0.0851021	-7.2873	3.16217e-13	1.16846e-11
ENSG00000132205,11	84034	elastin microfibril interfacer 2 [Source:HGNC Symbol;Acc:HGNC:19881]	EMILIN2	1259.83	-0.362159	0.0497777	-7.27553	3.45075e-13	1.27271e-11
ENSG00000136237,19	9771	Rap guanine nucleotide exchange factor 5 [Source:HGNC Symbol;Acc:HGNC:16862]	RAPGEF5	349.6	0.552553	0.0760041	7.27004	3.59375e-13	1.32298e-11
ENSG00000170961,7	3037	hyaluronan synthase 2 [Source:HGNC Symbol;Acc:HGNC:4819]	HAS2	265.874	0.485685	0.0668349	7.26694	3.67731e-13	1.35122e-11
ENSG00000113504,21	10723	solute carrier family 12 member 7 [Source:HGNC Symbol;Acc:HGNC:10915]	SLC12A7	18.5558	-2.72176	0.374652	-7.26478	3.7365e-13	1.37042e-11
ENSG00000231074,9	NA	HLA complex group 18 [Source:HGNC Symbol;Acc:HGNC:31337]	HCG18	328.133	0.486821	0.0670677	7.25866	3.90943e-13	1.43119e-11
ENSG00000158710,14	8407	transgelin 2 [Source:HGNC Symbol;Acc:HGNC:11554]	TAGLN2	1456.55	-0.380805	0.0524877	-7.25513	4.01279e-13	1.4663e-11
ENSG00000182180,14	51021	mitochondrial ribosomal protein S16 [Source:HGNC Symbol;Acc:HGNC:14048]	MRPS16	513.645	0.338148	0.0466279	7.25206	4.10468e-13	1.49711e-11
ENSG00000116285,13	54206	ERBB receptor feedback inhibitor 1 [Source:HGNC Symbol;Acc:HGNC:18185]	ERRFI1	346.695	0.431988	0.0595859	7.24983	4.17285e-13	1.51916e-11
ENSG00000081913,14	23239	PH domain and leucine rich repeat protein phosphatase 1 [Source:HGNC Symbol;Acc:HGNC:20610]	PHLPP1	542.013	-0.380908	0.0526049	-7.24091	4.45669e-13	1.61653e-11
ENSG00000119689,15	1743	dihydrolipoamide S-succinyltransferase [Source:HGNC Symbol;Acc:HGNC:2911]	DLST	761.631	0.29965	0.0413824	7.24099	4.45421e-13	1.61653e-11
ENSG00000123329,19	64333	Rho GTPase activating protein 9 [Source:HGNC Symbol;Acc:HGNC:14130]	ARHGAP9	13.0626	3.60702	0.498759	7.232	4.75946e-13	1.72319e-11
ENSG00000121005,9	83690	cysteine rich secretory protein LCCL domain containing 1 [Source:HGNC Symbol;Acc:HGNC:18206]	CRISPLD1	85.5533	-0.708954	0.0980377	-7.23144	4.77888e-13	1.72705e-11
ENSG00000117115,13	11240	peptidyl arginine deiminase 2 [Source:HGNC Symbol;Acc:HGNC:18341]	PADI2	43.6533	-4.10457	0.56803	-7.22598	4.97506e-13	1.79466e-11
ENSG00000183049,12	57118	calcium/calmodulin dependent protein kinase ID [Source:HGNC Symbol;Acc:HGNC:19341]	CAMK1D	300.139	-0.515054	0.0713761	-7.21606	5.35138e-13	1.92689e-11
ENSG00000185344,14	23545	ATPase H+ transporting V0 subunit a2 [Source:HGNC Symbol;Acc:HGNC:18481]	ATP6V0A2	329.61	0.406718	0.0564174	7.20909	5.63254e-13	2.02443e-11
ENSG00000074696,13	51495	3-hydroxyacyl-CoA dehydratase 3 [Source:HGNC Symbol;Acc:HGNC:24175]	HACD3	1484.76	-0.386566	0.0536517	-7.2051	5.8002e-13	2.0809e-11
ENSG00000036565,15	6570	solute carrier family 18 member A1 [Source:HGNC Symbol;Acc:HGNC:10934]	SLC18A1	256.429	-0.578296	0.0803412	-7.198	6.11023e-13	2.18815e-11
ENSG00000118898,16	5493	periplakin [Source:HGNC Symbol;Acc:HGNC:9273]	PPL	41.6176	-2.15178	0.299008	-7.19638	6.18331e-13	2.21031e-11
ENSG00000112242,15	1871	E2F transcription factor 3 [Source:HGNC Symbol;Acc:HGNC:3115]	E2F3	375.743	0.421129	0.0586386	7.18176	6.88201e-13	2.45562e-11
ENSG00000143127,13	8515	integrin subunit alpha 10 [Source:HGNC Symbol;Acc:HGNC:6135]	ITGA10	53.6025	1.04032	0.144894	7.17991	6.97581e-13	2.4846e-11
ENSG00000154930,15	84532	acyl-CoA synthetase short chain family member 1 [Source:HGNC Symbol;Acc:HGNC:16091]	ACSS1	456.535	-0.429026	0.0597566	-7.17956	6.99353e-13	2.48642e-11
ENSG00000103740,10	23205	acyl-CoA synthetase bubblegum family member 1 [Source:HGNC Symbol;Acc:HGNC:29567]	ACSBG1	380.187	-0.387401	0.0539913	-7.17525	7.21752e-13	2.56144e-11
ENSG00000137962,13	9411	Rho GTPase activating protein 29 [Source:HGNC Symbol;Acc:HGNC:30207]	ARHGAP29	22.7781	-2.55658	0.356783	-7.16564	7.74218e-13	2.7427e-11
ENSG00000111885,7	4121	mannosidase alpha class 1A member 1 [Source:HGNC Symbol;Acc:HGNC:6821]	MAN1A1	266.019	-0.696108	0.0971731	-7.16358	7.85953e-13	2.77929e-11
ENSG00000174080,11	8722	cathepsin F [Source:HGNC Symbol;Acc:HGNC:2531]	CTSF	235.546	-0.540973	0.075546	-7.16085	8.01776e-13	2.83017e-11
ENSG00000123080,12	1031	cyclin dependent kinase inhibitor 2C [Source:HGNC Symbol;Acc:HGNC:1789]	CDKN2C	1362.01	-0.325043	0.0453959	-7.16019	8.05631e-13	2.8387e-11
ENSG00000173706,14	57493	heart development protein with EGF like domains 1 [Source:HGNC Symbol;Acc:HGNC:29227]	HEG1	1887.13	-0.3344	0.0467105	-7.15899	8.12712e-13	2.85854e-11
ENSG00000116044,16	4780	nuclear factor, erythroid 2 like 2 [Source:HGNC Symbol;Acc:HGNC:7782]	NFE2L2	1320.54	0.414279	0.0578859	7.15682	8.25716e-13	2.89912e-11
ENSG00000101187,16	28231	solute carrier organic anion transporter family member 4A1 [Source:HGNC Symbol;Acc:HGNC:10953]	SLCO4A1	239.952	0.801426	0.112112	7.14847	8.77503e-13	3.07547e-11
ENSG00000080298,15	5991	regulatory factor X3 [Source:HGNC Symbol;Acc:HGNC:9984]	RFX3	192.998	-0.563544	0.0788994	-7.14257	9.15994e-13	3.20468e-11
ENSG00000124831,19	9208	LRR binding FLII interacting protein 1 [Source:HGNC Symbol;Acc:HGNC:6702]	LRRFIP1	234.453	0.558821	0.0783216	7.13495	9.68217e-13	3.38139e-11
ENSG00000166432,15	84460	zinc finger matrin-type 1 [Source:HGNC Symbol;Acc:HGNC:29377]	ZMAT1	326.484	0.624721	0.0876214	7.12978	1.00529e-12	3.49883e-11
ENSG00000166780,11	89927	bMERB domain containing 1 [Source:HGNC Symbol;Acc:HGNC:19213]	BMERB1	455.878	-0.447819	0.0628098	-7.12977	1.00539e-12	3.49883e-11
ENSG00000215845,11	100131187	thiosulfate sulfurtransferase like domain containing 1 [Source:HGNC Symbol;Acc:HGNC:35410]	TSTD1	18.0395	-2.95707	0.414985	-7.12572	1.0354e-12	3.59693e-11
ENSG00000074695,6	3998	lectin, mannose binding 1 [Source:HGNC Symbol;Acc:HGNC:6631]	LMAN1	806.456	-0.493262	0.0692774	-7.12011	1.07841e-12	3.73975e-11
ENSG00000196116,8	23424	tudor domain containing 7 [Source:HGNC Symbol;Acc:HGNC:30831]	TDRD7	55.7873	-1.12516	0.158109	-7.11634	1.10829e-12	3.83663e-11
ENSG00000119707,14	58517	RNA binding motif protein 25 [Source:HGNC Symbol;Acc:HGNC:23244]	RBM25	1915.89	0.378354	0.053195	7.11258	1.13892e-12	3.93575e-11
ENSG00000166526,17	7551	zinc finger protein 3 [Source:HGNC Symbol;Acc:HGNC:13089]	ZNF3	487.088	0.388229	0.05463	7.10651	1.1901e-12	4.10543e-11
ENSG00000148339,12	114789	solute carrier family 25 member 25 [Source:HGNC Symbol;Acc:HGNC:20663]	SLC25A25	176.937	-0.568787	0.0800695	-7.10367	1.21486e-12	4.18353e-11
ENSG00000196584,3	7516	X-ray repair cross complementing 2 [Source:HGNC Symbol;Acc:HGNC:12829]	XRCC2	388.361	0.523025	0.0736316	7.10326	1.21845e-12	4.1886e-11
ENSG00000144354,14	83879	cell division cycle associated 7 [Source:HGNC Symbol;Acc:HGNC:14628]	CDCA7	580.146	0.342797	0.0483147	7.09509	1.29264e-12	4.43589e-11
ENSG00000124784,9	83732	RIO kinase 1 [Source:HGNC Symbol;Acc:HGNC:18656]	RIOK1	156.823	0.639745	0.0901716	7.09475	1.29582e-12	4.43909e-11
ENSG00000161714,12	113026	phospholipase C delta 3 [Source:HGNC Symbol;Acc:HGNC:9061]	PLCD3	110.506	-0.733675	0.103602	-7.08166	1.42439e-12	4.87106e-11
ENSG00000076248,10	7374	uracil DNA glycosylase [Source:HGNC Symbol;Acc:HGNC:12572]	UNG	386.234	0.382442	0.0540142	7.0804	1.43736e-12	4.9069e-11
ENSG00000145428,14	285533	ring finger protein 175 [Source:HGNC Symbol;Acc:HGNC:27735]	RNF175	51.0088	1.19106	0.16831	7.07657	1.47768e-12	5.03585e-11
ENSG00000071242,12	6196	ribosomal protein S6 kinase A2 [Source:HGNC Symbol;Acc:HGNC:10431]	RPS6KA2	879.715	-0.369209	0.0522116	-7.07139	1.53388e-12	5.21836e-11
ENSG00000170632,14	83787	armadillo repeat containing 10 [Source:HGNC Symbol;Acc:HGNC:21706]	ARMC10	242.691	0.479769	0.0678661	7.06934	1.55671e-12	5.28693e-11
ENSG00000168461,13	11031	RAB31, member RAS oncogene family [Source:HGNC Symbol;Acc:HGNC:9771]	RAB31	1451.65	-0.351655	0.0497638	-7.06648	1.58916e-12	5.38784e-11
ENSG00000100522,10	64841	glucosamine-phosphate N-acetyltransferase 1 [Source:HGNC Symbol;Acc:HGNC:19980]	GNPNAT1	417.303	0.454608	0.0643426	7.06544	1.6011e-12	5.41903e-11
ENSG00000073060,16	949	scavenger receptor class B member 1 [Source:HGNC Symbol;Acc:HGNC:1664]	SCARB1	531.874	0.474478	0.0671676	7.06409	1.61673e-12	5.45322e-11
ENSG00000133135,14	79589	ring finger protein 128 [Source:HGNC Symbol;Acc:HGNC:21153]	RNF128	24.1258	-2.52376	0.357257	-7.06429	1.6144e-12	5.45322e-11
ENSG00000135473,15	9924	poly(A) specific ribonuclease subunit PAN2 [Source:HGNC Symbol;Acc:HGNC:20074]	PAN2	628.406	0.342048	0.0486278	7.034	2.00697e-12	6.75793e-11
ENSG00000153291,16	9481	solute carrier family 25 member 27 [Source:HGNC Symbol;Acc:HGNC:21065]	SLC25A27	52.716	1.09674	0.155945	7.03287	2.02333e-12	6.80141e-11
ENSG00000109099,15	5376	peripheral myelin protein 22 [Source:HGNC Symbol;Acc:HGNC:9118]	PMP22	1072.98	-0.401526	0.0571693	-7.02345	2.16459e-12	7.26388e-11
ENSG00000186318,16	23621	beta-secretase 1 [Source:HGNC Symbol;Acc:HGNC:933]	BACE1	726.887	0.299352	0.0426762	7.01449	2.30785e-12	7.73148e-11
ENSG00000178761,15	57184	family with sequence similarity 219 member B [Source:HGNC Symbol;Acc:HGNC:24695]	FAM219B	365.73	-0.419974	0.0598922	-7.01217	2.3465e-12	7.84766e-11
ENSG00000197043,14	309	annexin A6 [Source:HGNC Symbol;Acc:HGNC:544]	ANXA6	539.437	-0.370474	0.0528399	-7.01125	2.36197e-12	7.88604e-11
ENSG00000166546,14	146227	brain expressed associated with NEDD4 1 [Source:HGNC Symbol;Acc:HGNC:24160]	BEAN1	46.3204	-1.18658	0.169327	-7.00762	2.42405e-12	8.07964e-11
ENSG00000158292,7	387509	G protein-coupled receptor 153 [Source:HGNC Symbol;Acc:HGNC:23618]	GPR153	275.796	-0.657863	0.0940725	-6.99314	2.68795e-12	8.94412e-11
ENSG00000143061,17	3321	immunoglobulin superfamily member 3 [Source:HGNC Symbol;Acc:HGNC:5950]	IGSF3	455.702	-0.356284	0.0510957	-6.97289	3.10506e-12	1.03147e-10
ENSG00000116194,13	9068	angiopoietin like 1 [Source:HGNC Symbol;Acc:HGNC:489]	ANGPTL1	28.6171	1.01352	0.145426	6.9693	3.18532e-12	1.05635e-10
ENSG00000197498,13	84154	ribosome production factor 2 homolog [Source:HGNC Symbol;Acc:HGNC:20870]	RPF2	255.056	0.52389	0.0751801	6.96847	3.20395e-12	1.06074e-10
ENSG00000279713,1	NA	TEC	AC080038,3	160.135	-1.03264	0.148355	-6.96062	3.38789e-12	1.11976e-10
ENSG00000132603,15	51388	nucleolar pre-rRNA processing protein NIP7 [Source:HGNC Symbol;Acc:HGNC:24328]	NIP7	231.881	0.485734	0.0697922	6.95971	3.40976e-12	1.12511e-10
ENSG00000111845,5	55003	PAK1 interacting protein 1 [Source:HGNC Symbol;Acc:HGNC:20882]	PAK1IP1	171.651	0.640565	0.0920702	6.95736	3.46718e-12	1.14214e-10
ENSG00000181804,15	285195	solute carrier family 9 member A9 [Source:HGNC Symbol;Acc:HGNC:20653]	SLC9A9	35.5494	-1.1033	0.158895	-6.9436	3.82244e-12	1.25707e-10
ENSG00000093144,19	55862	ethylmalonyl-CoA decarboxylase 1 [Source:HGNC Symbol;Acc:HGNC:21489]	ECHDC1	386.34	0.540506	0.0778577	6.94222	3.85972e-12	1.26722e-10
ENSG00000137575,12	6386	syndecan binding protein [Source:HGNC Symbol;Acc:HGNC:10662]	SDCBP	1125.63	-0.524786	0.0756242	-6.93939	3.93801e-12	1.29078e-10
ENSG00000064989,13	10203	calcitonin receptor like receptor [Source:HGNC Symbol;Acc:HGNC:16709]	CALCRL	117.595	0.835144	0.12045	6.93352	4.1051e-12	1.34331e-10
ENSG00000104059,4	23359	family with sequence similarity 189 member A1 [Source:HGNC Symbol;Acc:HGNC:29075]	FAM189A1	69.8147	-0.984103	0.142178	-6.92162	4.46515e-12	1.45871e-10
ENSG00000155849,15	9844	engulfment and cell motility 1 [Source:HGNC Symbol;Acc:HGNC:16286]	ELMO1	12.3554	-2.41349	0.348734	-6.9207	4.49419e-12	1.46577e-10
ENSG00000100580,8	283578	transmembrane p24 trafficking protein family member 8 [Source:HGNC Symbol;Acc:HGNC:18633]	TMED8	437.896	0.409386	0.0591628	6.91966	4.52732e-12	1.47171e-10
ENSG00000154917,11	51560	RAB6B, member RAS oncogene family [Source:HGNC Symbol;Acc:HGNC:14902]	RAB6B	167.284	-0.556602	0.0804378	-6.91966	4.52715e-12	1.47171e-10
ENSG00000178075,20	54762	GRAM domain containing 1C [Source:HGNC Symbol;Acc:HGNC:25252]	GRAMD1C	47.0615	-1.15653	0.167238	-6.91545	4.66366e-12	1.51354e-10
ENSG00000049323,16	4052	latent transforming growth factor beta binding protein 1 [Source:HGNC Symbol;Acc:HGNC:6714]	LTBP1	740.088	-0.411567	0.0595453	-6.91183	4.78451e-12	1.55021e-10
ENSG00000136802,11	56262	leucine rich repeat containing 8 VRAC subunit A [Source:HGNC Symbol;Acc:HGNC:19027]	LRRC8A	527.987	-0.609676	0.0882395	-6.90933	4.86951e-12	1.57517e-10
ENSG00000102471,14	54602	Nedd4 family interacting protein 2 [Source:HGNC Symbol;Acc:HGNC:18537]	NDFIP2	289.081	-0.507273	0.0734573	-6.90568	4.99627e-12	1.61353e-10
ENSG00000064995,18	6882	TATA-box binding protein associated factor 11 [Source:HGNC Symbol;Acc:HGNC:11544]	TAF11	217.022	0.472171	0.0684082	6.90226	5.11831e-12	1.65024e-10
ENSG00000135074,15	8728	ADAM metallopeptidase domain 19 [Source:HGNC Symbol;Acc:HGNC:197]	ADAM19	1149.41	-0.322022	0.0466859	-6.89762	5.28804e-12	1.70218e-10
ENSG00000147041,12	94122	synaptotagmin like 5 [Source:HGNC Symbol;Acc:HGNC:15589]	SYTL5	90.8675	-1.35707	0.197274	-6.87911	6.02259e-12	1.93547e-10
ENSG00000142192,21	351	amyloid beta precursor protein [Source:HGNC Symbol;Acc:HGNC:620]	APP	9407.89	-0.27264	0.039652	-6.87583	6.16286e-12	1.97732e-10
ENSG00000181929,13	5571	protein kinase AMP-activated non-catalytic subunit gamma 1 [Source:HGNC Symbol;Acc:HGNC:9385]	PRKAG1	506.714	0.346904	0.0505556	6.86182	6.79864e-12	2.17777e-10
ENSG00000285935,1	NA	novel transcript, antisense to WASF3	AL159978,1	306.546	-0.427727	0.0623678	-6.85815	6.97583e-12	2.23091e-10
ENSG00000084234,17	334	amyloid beta precursor like protein 2 [Source:HGNC Symbol;Acc:HGNC:598]	APLP2	4490.84	-0.19868	0.0289886	-6.85372	7.19551e-12	2.29744e-10
ENSG00000144231,11	5433	RNA polymerase II subunit D [Source:HGNC Symbol;Acc:HGNC:9191]	POLR2D	390.998	0.402672	0.0587863	6.84975	7.398e-12	2.35828e-10
ENSG00000151552,12	5860	quinoid dihydropteridine reductase [Source:HGNC Symbol;Acc:HGNC:9752]	QDPR	267.128	-0.490125	0.0715609	-6.84906	7.43365e-12	2.36582e-10
ENSG00000124571,18	57510	exportin 5 [Source:HGNC Symbol;Acc:HGNC:17675]	XPO5	834.203	0.279081	0.0407524	6.84823	7.47718e-12	2.37584e-10
ENSG00000134070,5	3656	interleukin 1 receptor associated kinase 2 [Source:HGNC Symbol;Acc:HGNC:6113]	IRAK2	120.06	-0.63649	0.0930084	-6.84336	7.73562e-12	2.45401e-10
ENSG00000185033,14	10509	semaphorin 4B [Source:HGNC Symbol;Acc:HGNC:10730]	SEMA4B	194.296	-0.769602	0.112467	-6.8429	7.76034e-12	2.4579e-10
ENSG00000170677,6	9306	suppressor of cytokine signaling 6 [Source:HGNC Symbol;Acc:HGNC:16833]	SOCS6	1076.27	-0.435801	0.0637155	-6.83979	7.93077e-12	2.50785e-10
ENSG00000135597,18	85021	RALBP1 associated Eps domain containing 1 [Source:HGNC Symbol;Acc:HGNC:15578]	REPS1	361.145	0.418003	0.0611342	6.83747	8.06064e-12	2.54484e-10
ENSG00000231500,7	6222	ribosomal protein S18 [Source:HGNC Symbol;Acc:HGNC:10401]	RPS18	6521.59	0.415609	0.061089	6.80335	1.02216e-11	3.22192e-10
ENSG00000117395,12	10969	EBNA1 binding protein 2 [Source:HGNC Symbol;Acc:HGNC:15531]	EBNA1BP2	337.036	0.484295	0.0712064	6.80128	1.0369e-11	3.26319e-10
ENSG00000163251,4	7855	frizzled class receptor 5 [Source:HGNC Symbol;Acc:HGNC:4043]	FZD5	296.568	0.392081	0.0576616	6.79969	1.04847e-11	3.29434e-10
ENSG00000111696,12	51559	5'-nucleotidase domain containing 3 [Source:HGNC Symbol;Acc:HGNC:30826]	NT5DC3	86.0548	0.683996	0.100607	6.7987	1.0557e-11	3.31178e-10
ENSG00000104763,19	427	N-acylsphingosine amidohydrolase 1 [Source:HGNC Symbol;Acc:HGNC:735]	ASAH1	458.497	-0.394072	0.0579836	-6.79626	1.0737e-11	3.3629e-10
ENSG00000118298,12	23632	carbonic anhydrase 14 [Source:HGNC Symbol;Acc:HGNC:1372]	CA14	290.218	-0.408828	0.060162	-6.79545	1.07972e-11	3.37641e-10
ENSG00000056998,20	8908	glycogenin 2 [Source:HGNC Symbol;Acc:HGNC:4700]	GYG2	26.3597	-1.24497	0.183246	-6.79397	1.09087e-11	3.40586e-10
ENSG00000101057,16	4605	MYB proto-oncogene like 2 [Source:HGNC Symbol;Acc:HGNC:7548]	MYBL2	1247.48	0.423869	0.062406	6.79212	1.10501e-11	3.44455e-10
ENSG00000107104,18	23189	KN motif and ankyrin repeat domains 1 [Source:HGNC Symbol;Acc:HGNC:19309]	KANK1	260.992	-0.408213	0.0601741	-6.78386	1.17006e-11	3.64158e-10
ENSG00000026508,18	960	CD44 molecule (Indian blood group) [Source:HGNC Symbol;Acc:HGNC:1681]	CD44	928.166	0.421352	0.0622114	6.77291	1.26218e-11	3.92211e-10
ENSG00000134809,9	26519	translocase of inner mitochondrial membrane 10 [Source:HGNC Symbol;Acc:HGNC:11814]	TIMM10	179.263	0.566032	0.0836597	6.76589	1.32494e-11	4.11066e-10
ENSG00000100330,15	8897	myotubularin related protein 3 [Source:HGNC Symbol;Acc:HGNC:7451]	MTMR3	670.936	-0.306119	0.0453207	-6.75451	1.43316e-11	4.43943e-10
ENSG00000184602,6	8303	stannin [Source:HGNC Symbol;Acc:HGNC:11149]	SNN	397.68	-0.376033	0.0556962	-6.7515	1.46321e-11	4.5254e-10
ENSG00000105737,9	2901	glutamate ionotropic receptor kainate type subunit 5 [Source:HGNC Symbol;Acc:HGNC:4583]	GRIK5	537.314	-0.559608	0.0830638	-6.73709	1.61589e-11	4.98979e-10
ENSG00000198911,12	6721	sterol regulatory element binding transcription factor 2 [Source:HGNC Symbol;Acc:HGNC:11290]	SREBF2	2497.45	-0.369516	0.054885	-6.73255	1.66716e-11	5.14007e-10
ENSG00000176014,13	84617	tubulin beta 6 class V [Source:HGNC Symbol;Acc:HGNC:20776]	TUBB6	346.005	-0.466683	0.069328	-6.73152	1.67894e-11	5.16832e-10
ENSG00000109846,9	1410	crystallin alpha B [Source:HGNC Symbol;Acc:HGNC:2389]	CRYAB	315.926	-0.576966	0.0857611	-6.72759	1.72496e-11	5.30169e-10
ENSG00000131095,13	2670	glial fibrillary acidic protein [Source:HGNC Symbol;Acc:HGNC:4235]	GFAP	53.6717	-1.18715	0.176583	-6.72293	1.78106e-11	5.4656e-10
ENSG00000144724,20	5793	protein tyrosine phosphatase receptor type G [Source:HGNC Symbol;Acc:HGNC:9671]	PTPRG	1415.09	-0.307911	0.0458067	-6.72197	1.79285e-11	5.49326e-10
ENSG00000205336,12	9289	adhesion G protein-coupled receptor G1 [Source:HGNC Symbol;Acc:HGNC:4512]	ADGRG1	2531.61	-0.469603	0.0698671	-6.72138	1.80014e-11	5.50703e-10
ENSG00000088205,13	8886	DEAD-box helicase 18 [Source:HGNC Symbol;Acc:HGNC:2741]	DDX18	1050.2	0.456612	0.0679368	6.72112	1.80327e-11	5.50808e-10
ENSG00000144560,15	9686	vestigial like family member 4 [Source:HGNC Symbol;Acc:HGNC:28966]	VGLL4	1937.36	-0.223437	0.033246	-6.72071	1.80838e-11	5.50999e-10
ENSG00000264364,3	140735	dynein light chain LC8-type 2 [Source:HGNC Symbol;Acc:HGNC:24596]	DYNLL2	1053.62	-0.233801	0.0347886	-6.72062	1.80949e-11	5.50999e-10
ENSG00000103222,19	4363	ATP binding cassette subfamily C member 1 [Source:HGNC Symbol;Acc:HGNC:51]	ABCC1	201.594	-0.592382	0.0881875	-6.7173	1.85117e-11	5.62823e-10
ENSG00000121900,19	113452	transmembrane protein 54 [Source:HGNC Symbol;Acc:HGNC:24143]	TMEM54	41.2729	-1.26413	0.188451	-6.70797	1.97351e-11	5.99095e-10
ENSG00000116711,10	5321	phospholipase A2 group IVA [Source:HGNC Symbol;Acc:HGNC:9035]	PLA2G4A	7.63507	2.30113	0.343094	6.707	1.98667e-11	6.02164e-10
ENSG00000180801,14	79642	arylsulfatase family member J [Source:HGNC Symbol;Acc:HGNC:26286]	ARSJ	155.314	-0.655592	0.0977618	-6.70601	2.00021e-11	6.0534e-10
ENSG00000149177,13	5795	protein tyrosine phosphatase receptor type J [Source:HGNC Symbol;Acc:HGNC:9673]	PTPRJ	475.968	0.305929	0.0456325	6.7042	2.02519e-11	6.11962e-10
ENSG00000132613,15	92154	MTSS I-BAR domain containing 2 [Source:HGNC Symbol;Acc:HGNC:25094]	MTSS2	779.079	-0.709037	0.105786	-6.70253	2.0484e-11	6.18029e-10
ENSG00000169184,6	4330	MN1 proto-oncogene, transcriptional regulator [Source:HGNC Symbol;Acc:HGNC:7180]	MN1	45.9705	-1.14632	0.171101	-6.69969	2.08867e-11	6.29216e-10
ENSG00000182934,12	6734	SRP receptor subunit alpha [Source:HGNC Symbol;Acc:HGNC:11307]	SRPRA	863.53	0.338953	0.0505973	6.69903	2.09803e-11	6.31072e-10
ENSG00000188766,12	399473	sprouty related EVH1 domain containing 3 [Source:HGNC Symbol;Acc:HGNC:31041]	SPRED3	102.229	-0.809596	0.120923	-6.69512	2.15501e-11	6.47226e-10
ENSG00000139318,8	1848	dual specificity phosphatase 6 [Source:HGNC Symbol;Acc:HGNC:3072]	DUSP6	1763.98	0.219661	0.0328315	6.69056	2.22322e-11	6.66697e-10
ENSG00000020922,12	4361	MRE11 homolog, double strand break repair nuclease [Source:HGNC Symbol;Acc:HGNC:7230]	MRE11	396.083	0.413696	0.0618429	6.68947	2.23983e-11	6.70656e-10
ENSG00000273090,1	NA	novel transcript	AC007378,1	89.3496	-0.897802	0.134383	-6.68092	2.37443e-11	7.09883e-10
ENSG00000187957,8	92737	delta/notch like EGF repeat containing [Source:HGNC Symbol;Acc:HGNC:24456]	DNER	181.598	-0.7952	0.119121	-6.67558	2.46249e-11	7.35095e-10
ENSG00000131069,20	55902	acyl-CoA synthetase short chain family member 2 [Source:HGNC Symbol;Acc:HGNC:15814]	ACSS2	434.617	-0.411032	0.0616811	-6.66383	2.66786e-11	7.95199e-10
ENSG00000026025,16	7431	vimentin [Source:HGNC Symbol;Acc:HGNC:12692]	VIM	36660.4	-0.246336	0.0369697	-6.66318	2.67968e-11	7.96316e-10
ENSG00000089280,18	2521	FUS RNA binding protein [Source:HGNC Symbol;Acc:HGNC:4010]	FUS	3922.58	0.222431	0.0333814	6.66331	2.67725e-11	7.96316e-10
ENSG00000159063,13	79053	ALG8 alpha-1,3-glucosyltransferase [Source:HGNC Symbol;Acc:HGNC:23161]	ALG8	244.526	0.445381	0.0668623	6.66117	2.71663e-11	8.06084e-10
ENSG00000120458,11	79684	Myb/SANT DNA binding domain containing 2 [Source:HGNC Symbol;Acc:HGNC:26266]	MSANTD2	146.744	0.601746	0.0905136	6.64813	2.9685e-11	8.79496e-10
ENSG00000106066,15	54504	carboxypeptidase vitellogenic like [Source:HGNC Symbol;Acc:HGNC:14399]	CPVL	660.108	-0.429922	0.0647773	-6.63693	3.20292e-11	9.47525e-10
ENSG00000174444,15	6124	ribosomal protein L4 [Source:HGNC Symbol;Acc:HGNC:10353]	RPL4	9008.57	-0.272499	0.0410627	-6.63616	3.21955e-11	9.5102e-10
ENSG00000162738,6	57216	VANGL planar cell polarity protein 2 [Source:HGNC Symbol;Acc:HGNC:15511]	VANGL2	546.524	-0.303842	0.0458077	-6.63299	3.2896e-11	9.70259e-10
ENSG00000101493,11	9658	zinc finger protein 516 [Source:HGNC Symbol;Acc:HGNC:28990]	ZNF516	153.648	-0.555872	0.0838221	-6.63156	3.32148e-11	9.78202e-10
ENSG00000182158,15	64764	cAMP responsive element binding protein 3 like 2 [Source:HGNC Symbol;Acc:HGNC:23720]	CREB3L2	638.957	0.310016	0.0467703	6.62848	3.3915e-11	9.97335e-10
ENSG00000125977,7	8894	eukaryotic translation initiation factor 2 subunit beta [Source:HGNC Symbol;Acc:HGNC:3266]	EIF2S2	895.441	0.478812	0.072249	6.62725	3.42007e-11	1.00424e-09
ENSG00000249158,6	56138	protocadherin alpha 11 [Source:HGNC Symbol;Acc:HGNC:8665]	PCDHA11	28.7547	-1.48505	0.224151	-6.62523	3.46717e-11	1.01656e-09
ENSG00000172037,14	3913	laminin subunit beta 2 [Source:HGNC Symbol;Acc:HGNC:6487]	LAMB2	1718.61	-0.552251	0.0833846	-6.62293	3.52139e-11	1.03092e-09
ENSG00000100503,23	51199	ninein [Source:HGNC Symbol;Acc:HGNC:14906]	NIN	1168.54	0.410623	0.0620041	6.62252	3.53131e-11	1.03229e-09
ENSG00000166508,17	4176	minichromosome maintenance complex component 7 [Source:HGNC Symbol;Acc:HGNC:6950]	MCM7	3245.79	0.349625	0.0528053	6.62102	3.56735e-11	1.04129e-09
ENSG00000055044,11	51602	NOP58 ribonucleoprotein [Source:HGNC Symbol;Acc:HGNC:29926]	NOP58	584.773	0.394409	0.0596339	6.61384	3.74483e-11	1.09148e-09
ENSG00000075568,17	23505	transmembrane protein 131 [Source:HGNC Symbol;Acc:HGNC:30366]	TMEM131	1539.45	-0.304147	0.0460041	-6.61131	3.80945e-11	1.10867e-09
ENSG00000108561,8	708	complement C1q binding protein [Source:HGNC Symbol;Acc:HGNC:1243]	C1QBP	431.126	0.439117	0.0664524	6.60799	3.89562e-11	1.13208e-09
ENSG00000257621,8	NA	PSMA3 antisense RNA 1 [Source:HGNC Symbol;Acc:HGNC:26445]	PSMA3-AS1	355.753	0.551989	0.0835373	6.6077	3.90347e-11	1.1327e-09
ENSG00000139971,15	145407	armadillo like helical domain containing 4 [Source:HGNC Symbol;Acc:HGNC:19846]	ARMH4	48.3579	-1.19597	0.181103	-6.60383	4.00665e-11	1.16093e-09
ENSG00000152078,10	148534	TLC domain containing 4 [Source:HGNC Symbol;Acc:HGNC:26477]	TLCD4	25.7419	-2.04054	0.309211	-6.5992	4.13385e-11	1.19603e-09
ENSG00000142173,15	1292	collagen type VI alpha 2 chain [Source:HGNC Symbol;Acc:HGNC:2212]	COL6A2	220.271	1.34318	0.203707	6.59366	4.29125e-11	1.23975e-09
ENSG00000174938,14	26470	seizure related 6 homolog like 2 [Source:HGNC Symbol;Acc:HGNC:30844]	SEZ6L2	622.962	-0.800361	0.121618	-6.58096	4.67431e-11	1.34844e-09
ENSG00000172765,17	23023	transmembrane and coiled-coil domain family 1 [Source:HGNC Symbol;Acc:HGNC:29116]	TMCC1	375.559	-0.378175	0.057562	-6.56988	5.03545e-11	1.4505e-09
ENSG00000163482,12	27148	serine/threonine kinase 36 [Source:HGNC Symbol;Acc:HGNC:17209]	STK36	294.579	0.395178	0.0601579	6.56902	5.06485e-11	1.45685e-09
ENSG00000065675,15	5588	protein kinase C theta [Source:HGNC Symbol;Acc:HGNC:9410]	PRKCQ	127.391	-0.854606	0.13014	-6.56682	5.14012e-11	1.47634e-09
ENSG00000146143,19	5558	DNA primase subunit 2 [Source:HGNC Symbol;Acc:HGNC:9370]	PRIM2	145.204	0.522772	0.0796434	6.56392	5.24126e-11	1.50321e-09
ENSG00000154153,13	54463	reticulophagy regulator 1 [Source:HGNC Symbol;Acc:HGNC:25964]	RETREG1	208.893	-0.613168	0.0934363	-6.56242	5.29419e-11	1.51618e-09
ENSG00000172915,18	26960	neurobeachin [Source:HGNC Symbol;Acc:HGNC:7648]	NBEA	259.109	-0.599052	0.0912883	-6.56219	5.30219e-11	1.51627e-09
ENSG00000166405,15	79608	RIC3 acetylcholine receptor chaperone [Source:HGNC Symbol;Acc:HGNC:30338]	RIC3	92.2114	-0.844624	0.128804	-6.55743	5.47434e-11	1.56324e-09
ENSG00000117707,16	5629	prospero homeobox 1 [Source:HGNC Symbol;Acc:HGNC:9459]	PROX1	496.913	-0.413061	0.0630084	-6.55564	5.54034e-11	1.5798e-09
ENSG00000256269,10	3145	hydroxymethylbilane synthase [Source:HGNC Symbol;Acc:HGNC:4982]	HMBS	163.985	0.524019	0.0799938	6.55075	5.72496e-11	1.63008e-09
ENSG00000136731,13	56886	UDP-glucose glycoprotein glucosyltransferase 1 [Source:HGNC Symbol;Acc:HGNC:15663]	UGGT1	761.602	0.30206	0.0461144	6.55023	5.74497e-11	1.63342e-09
ENSG00000247556,6	729082	OIP5 antisense RNA 1 [Source:HGNC Symbol;Acc:HGNC:43563]	OIP5-AS1	1357.58	-0.357878	0.0547038	-6.5421	6.06624e-11	1.72229e-09
ENSG00000203875,12	NA	small nucleolar RNA host gene 5 [Source:HGNC Symbol;Acc:HGNC:21026]	SNHG5	477.242	0.412027	0.0629996	6.54015	6.14554e-11	1.7423e-09
ENSG00000141469,18	6563	solute carrier family 14 member 1 (Kidd blood group) [Source:HGNC Symbol;Acc:HGNC:10918]	SLC14A1	5.59091	2.92174	0.447417	6.53024	6.56643e-11	1.85895e-09
ENSG00000254662,1	NA	novel transcript	AP000781,1	170.323	0.576012	0.0882842	6.52452	6.82188e-11	1.9285e-09
ENSG00000101265,16	9770	Ras association domain family member 2 [Source:HGNC Symbol;Acc:HGNC:9883]	RASSF2	1194.27	0.283665	0.0434821	6.52373	6.85799e-11	1.93515e-09
ENSG00000168569,8	79064	transmembrane protein 223 [Source:HGNC Symbol;Acc:HGNC:28464]	TMEM223	142.878	0.563988	0.0864538	6.52358	6.86502e-11	1.93515e-09
ENSG00000178802,18	4351	mannose phosphate isomerase [Source:HGNC Symbol;Acc:HGNC:7216]	MPI	525.895	-0.335126	0.0513736	-6.52332	6.87688e-11	1.93573e-09
ENSG00000095637,22	10580	sorbin and SH3 domain containing 1 [Source:HGNC Symbol;Acc:HGNC:14565]	SORBS1	373.807	-0.371154	0.0569069	-6.52213	6.93141e-11	1.9483e-09
ENSG00000166170,9	9529	BCL2 associated athanogene 5 [Source:HGNC Symbol;Acc:HGNC:941]	BAG5	1076.3	0.320698	0.0491747	6.5216	6.95596e-11	1.95242e-09
ENSG00000100994,12	5834	glycogen phosphorylase B [Source:HGNC Symbol;Acc:HGNC:9723]	PYGB	1262.03	-0.457285	0.0701231	-6.52118	6.97568e-11	1.95517e-09
ENSG00000100077,15	157	G protein-coupled receptor kinase 3 [Source:HGNC Symbol;Acc:HGNC:290]	GRK3	38.8214	-1.0019	0.153699	-6.51857	7.09818e-11	1.98668e-09
ENSG00000113296,14	7060	thrombospondin 4 [Source:HGNC Symbol;Acc:HGNC:11788]	THBS4	44.4165	-1.07147	0.164552	-6.51141	7.44469e-11	2.08072e-09
ENSG00000163462,18	80128	tripartite motif containing 46 [Source:HGNC Symbol;Acc:HGNC:19019]	TRIM46	34.178	-1.56262	0.24	-6.51091	7.46982e-11	2.08479e-09
ENSG00000144366,16	51454	GULP PTB domain containing engulfment adaptor 1 [Source:HGNC Symbol;Acc:HGNC:18649]	GULP1	76.5204	0.881208	0.135399	6.50825	7.60295e-11	2.11895e-09
ENSG00000136379,12	58489	abhydrolase domain containing 17C [Source:HGNC Symbol;Acc:HGNC:26925]	ABHD17C	345.399	-0.4685	0.0720377	-6.50354	7.84509e-11	2.18335e-09
ENSG00000034053,14	321	amyloid beta precursor protein binding family A member 2 [Source:HGNC Symbol;Acc:HGNC:579]	APBA2	415.4	-0.552213	0.0849817	-6.49802	8.13823e-11	2.26174e-09
ENSG00000080493,17	8671	solute carrier family 4 member 4 [Source:HGNC Symbol;Acc:HGNC:11030]	SLC4A4	587.783	-0.421839	0.0650317	-6.48666	8.77576e-11	2.43549e-09
ENSG00000128708,13	8520	histone acetyltransferase 1 [Source:HGNC Symbol;Acc:HGNC:4821]	HAT1	639.786	0.409391	0.0631247	6.48544	8.84712e-11	2.45185e-09
ENSG00000105605,7	59284	calcium voltage-gated channel auxiliary subunit gamma 7 [Source:HGNC Symbol;Acc:HGNC:13626]	CACNG7	467.048	-0.66153	0.102048	-6.48257	9.01748e-11	2.49555e-09
ENSG00000162512,16	9672	syndecan 3 [Source:HGNC Symbol;Acc:HGNC:10660]	SDC3	2556.51	-0.43225	0.0666909	-6.48139	9.08824e-11	2.51161e-09
ENSG00000113552,16	10007	glucosamine-6-phosphate deaminase 1 [Source:HGNC Symbol;Acc:HGNC:4417]	GNPDA1	425.404	-0.330687	0.0510491	-6.47782	9.30544e-11	2.56804e-09
ENSG00000119906,13	55719	SMC5-SMC6 complex localization factor 2 [Source:HGNC Symbol;Acc:HGNC:17814]	SLF2	548.564	0.354949	0.054816	6.47528	9.46357e-11	2.60803e-09
ENSG00000121104,8	81558	family with sequence similarity 117 member A [Source:HGNC Symbol;Acc:HGNC:24179]	FAM117A	86.5021	-0.805614	0.124519	-6.46981	9.81268e-11	2.70031e-09
ENSG00000144840,9	285282	RAB, member of RAS oncogene family like 3 [Source:HGNC Symbol;Acc:HGNC:18072]	RABL3	387.037	-0.451111	0.0697277	-6.46961	9.82579e-11	2.70031e-09
ENSG00000240694,9	10687	PNMA family member 2 [Source:HGNC Symbol;Acc:HGNC:9159]	PNMA2	1657.18	-0.246817	0.0381996	-6.46123	1.03856e-10	2.8502e-09
ENSG00000166147,13	2200	fibrillin 1 [Source:HGNC Symbol;Acc:HGNC:3603]	FBN1	1056.78	0.24879	0.0385331	6.45652	1.07141e-10	2.93626e-09
ENSG00000137094,14	25822	DnaJ heat shock protein family (Hsp40) member B5 [Source:HGNC Symbol;Acc:HGNC:14887]	DNAJB5	105.378	-0.670925	0.103955	-6.45399	1.08944e-10	2.98154e-09
ENSG00000100983,12	2937	glutathione synthetase [Source:HGNC Symbol;Acc:HGNC:4624]	GSS	658.384	-0.335007	0.0519155	-6.45293	1.09706e-10	2.99823e-09
ENSG00000070614,15	3340	N-deacetylase and N-sulfotransferase 1 [Source:HGNC Symbol;Acc:HGNC:7680]	NDST1	581.761	-0.385508	0.0597456	-6.45248	1.10032e-10	3.00297e-09
ENSG00000135446,17	1019	cyclin dependent kinase 4 [Source:HGNC Symbol;Acc:HGNC:1773]	CDK4	1207.78	0.268209	0.0415924	6.44851	1.12953e-10	3.07845e-09
ENSG00000162873,14	55220	kelch domain containing 8A [Source:HGNC Symbol;Acc:HGNC:25573]	KLHDC8A	2074.83	-0.236542	0.0367025	-6.44484	1.1572e-10	3.1495e-09
ENSG00000090539,15	8646	chordin [Source:HGNC Symbol;Acc:HGNC:1949]	CHRD	35.6302	-1.19781	0.185905	-6.44312	1.17042e-10	3.18109e-09
ENSG00000089053,13	51433	anaphase promoting complex subunit 5 [Source:HGNC Symbol;Acc:HGNC:15713]	ANAPC5	1012.38	0.252635	0.0392334	6.43927	1.20051e-10	3.25837e-09
ENSG00000117643,14	57134	mannosidase alpha class 1C member 1 [Source:HGNC Symbol;Acc:HGNC:19080]	MAN1C1	241.473	-0.456136	0.0708491	-6.43813	1.20952e-10	3.27832e-09
ENSG00000133138,20	54885	TBC1 domain family member 8B [Source:HGNC Symbol;Acc:HGNC:24715]	TBC1D8B	54.8734	-1.25774	0.195367	-6.43783	1.21193e-10	3.28035e-09
ENSG00000188677,14	29780	parvin beta [Source:HGNC Symbol;Acc:HGNC:14653]	PARVB	270.717	-0.540703	0.0840313	-6.43454	1.23844e-10	3.34294e-09
ENSG00000189046,11	121642	alkB homolog 2, alpha-ketoglutarate dependent dioxygenase [Source:HGNC Symbol;Acc:HGNC:32487]	ALKBH2	146.058	0.548791	0.0852879	6.43456	1.23829e-10	3.34294e-09
ENSG00000117280,13	8934	RAB29, member RAS oncogene family [Source:HGNC Symbol;Acc:HGNC:9789]	RAB29	131.926	-0.584769	0.0910366	-6.42345	1.33219e-10	3.59109e-09
ENSG00000163161,13	2071	ERCC excision repair 3, TFIIH core complex helicase subunit [Source:HGNC Symbol;Acc:HGNC:3435]	ERCC3	456.317	0.318997	0.0496666	6.42277	1.33818e-10	3.60231e-09
ENSG00000070778,13	11099	protein tyrosine phosphatase non-receptor type 21 [Source:HGNC Symbol;Acc:HGNC:9651]	PTPN21	324.227	0.43853	0.0683307	6.41776	1.38294e-10	3.71774e-09
ENSG00000067182,7	7132	TNF receptor superfamily member 1A [Source:HGNC Symbol;Acc:HGNC:11916]	TNFRSF1A	673.946	-0.406325	0.0633363	-6.41537	1.40485e-10	3.77151e-09
ENSG00000121743,4	2700	gap junction protein alpha 3 [Source:HGNC Symbol;Acc:HGNC:4277]	GJA3	48.2574	-1.37206	0.213965	-6.41253	1.43127e-10	3.8372e-09
ENSG00000130813,18	55337	shiftless antiviral inhibitor of ribosomal frameshifting [Source:HGNC Symbol;Acc:HGNC:25649]	SHFL	129.244	-0.737246	0.114982	-6.41185	1.43762e-10	3.849e-09
ENSG00000066926,11	2235	ferrochelatase [Source:HGNC Symbol;Acc:HGNC:3647]	FECH	178.758	-0.522386	0.0815293	-6.40734	1.48081e-10	3.95927e-09
ENSG00000014216,15	823	calpain 1 [Source:HGNC Symbol;Acc:HGNC:1476]	CAPN1	275.221	-0.569529	0.0889558	-6.40239	1.52967e-10	4.08437e-09
ENSG00000076770,14	55796	muscleblind like splicing regulator 3 [Source:HGNC Symbol;Acc:HGNC:20564]	MBNL3	622.254	0.409514	0.0640043	6.39822	1.57194e-10	4.19156e-09
ENSG00000148700,15	120	adducin 3 [Source:HGNC Symbol;Acc:HGNC:245]	ADD3	434.965	0.431898	0.0675456	6.39418	1.61416e-10	4.29832e-09
ENSG00000115935,17	7456	WAS/WASL interacting protein family member 1 [Source:HGNC Symbol;Acc:HGNC:12736]	WIPF1	472.003	0.321084	0.0502564	6.38891	1.6707e-10	4.4429e-09
ENSG00000012822,16	57658	calcium binding and coiled-coil domain 1 [Source:HGNC Symbol;Acc:HGNC:29306]	CALCOCO1	271.124	-0.459097	0.0718983	-6.38537	1.70984e-10	4.54085e-09
ENSG00000140199,12	9990	solute carrier family 12 member 6 [Source:HGNC Symbol;Acc:HGNC:10914]	SLC12A6	485.646	-0.334025	0.0525362	-6.358	2.04393e-10	5.42082e-09
ENSG00000132471,12	23558	WW domain binding protein 2 [Source:HGNC Symbol;Acc:HGNC:12738]	WBP2	493.941	-0.480551	0.0756019	-6.35634	2.06624e-10	5.4659e-09
ENSG00000133110,15	10631	periostin [Source:HGNC Symbol;Acc:HGNC:16953]	POSTN	443.707	0.620369	0.0975987	6.35632	2.06647e-10	5.4659e-09
ENSG00000125730,17	718	complement C3 [Source:HGNC Symbol;Acc:HGNC:1318]	C3	16.0001	-1.77647	0.279853	-6.34786	2.18333e-10	5.76727e-09
ENSG00000119699,7	7043	transforming growth factor beta 3 [Source:HGNC Symbol;Acc:HGNC:11769]	TGFB3	142.648	0.556386	0.0876794	6.34569	2.21436e-10	5.84141e-09
ENSG00000109572,14	1182	chloride voltage-gated channel 3 [Source:HGNC Symbol;Acc:HGNC:2021]	CLCN3	842.251	-0.374237	0.0590102	-6.3419	2.26942e-10	5.97591e-09
ENSG00000196655,12	51399	trafficking protein particle complex 4 [Source:HGNC Symbol;Acc:HGNC:19943]	TRAPPC4	260.845	0.401429	0.0632991	6.34177	2.2714e-10	5.97591e-09
ENSG00000198947,15	1756	dystrophin [Source:HGNC Symbol;Acc:HGNC:2928]	DMD	98.5767	-0.691246	0.109091	-6.33641	2.35184e-10	6.17931e-09
ENSG00000149532,15	79869	cleavage and polyadenylation specific factor 7 [Source:HGNC Symbol;Acc:HGNC:30098]	CPSF7	791.428	0.26235	0.0414056	6.33611	2.35633e-10	6.17965e-09
ENSG00000177694,16	254827	N-acetylated alpha-linked acidic dipeptidase like 2 [Source:HGNC Symbol;Acc:HGNC:23219]	NAALADL2	117.904	-0.830043	0.131005	-6.33599	2.35824e-10	6.17965e-09
ENSG00000205363,5	388135	inhibitory synaptic factor 1 [Source:HGNC Symbol;Acc:HGNC:33753]	INSYN1	378.257	-0.656793	0.103665	-6.3357	2.36272e-10	6.18319e-09
ENSG00000147202,18	1730	diaphanous related formin 2 [Source:HGNC Symbol;Acc:HGNC:2877]	DIAPH2	47.0697	-1.31249	0.207275	-6.33215	2.41767e-10	6.31859e-09
ENSG00000112118,20	4172	minichromosome maintenance complex component 3 [Source:HGNC Symbol;Acc:HGNC:6945]	MCM3	1614.86	0.275143	0.0434663	6.33003	2.45108e-10	6.39745e-09
ENSG00000141934,10	8612	phospholipid phosphatase 2 [Source:HGNC Symbol;Acc:HGNC:9230]	PLPP2	118.947	-0.683639	0.108239	-6.31598	2.6845e-10	6.99742e-09
ENSG00000064419,13	23534	transportin 3 [Source:HGNC Symbol;Acc:HGNC:17103]	TNPO3	938.917	0.248894	0.0394201	6.31389	2.72114e-10	7.07424e-09
ENSG00000175376,9	84285	eukaryotic translation initiation factor 1A domain containing [Source:HGNC Symbol;Acc:HGNC:28147]	EIF1AD	191.266	0.46443	0.0735563	6.31394	2.72026e-10	7.07424e-09
ENSG00000112759,18	2030	solute carrier family 29 member 1 (Augustine blood group) [Source:HGNC Symbol;Acc:HGNC:11003]	SLC29A1	270.058	0.548057	0.0868119	6.31316	2.73401e-10	7.09836e-09
ENSG00000101003,10	9837	GINS complex subunit 1 [Source:HGNC Symbol;Acc:HGNC:28980]	GINS1	693.347	0.279668	0.0443367	6.30782	2.82987e-10	7.33759e-09
ENSG00000110090,13	1374	carnitine palmitoyltransferase 1A [Source:HGNC Symbol;Acc:HGNC:2328]	CPT1A	93.4785	-0.561779	0.0890888	-6.30583	2.86647e-10	7.42273e-09
ENSG00000090621,14	8761	poly(A) binding protein cytoplasmic 4 [Source:HGNC Symbol;Acc:HGNC:8557]	PABPC4	692.386	0.283103	0.0449167	6.30283	2.92257e-10	7.55809e-09
ENSG00000286190,1	728392	uncharacterized LOC728392 [Source:NCBI gene;Acc:728392]	AC055839,2	73.0932	-0.783903	0.124465	-6.29817	3.01172e-10	7.77843e-09
ENSG00000104324,16	10404	carboxypeptidase Q [Source:HGNC Symbol;Acc:HGNC:16910]	CPQ	58.9463	-0.87471	0.138891	-6.29781	3.01878e-10	7.78649e-09
ENSG00000254894,1	NA	NAV2 antisense RNA 1 [Source:HGNC Symbol;Acc:HGNC:40744]	NAV2-AS1	59.1338	-0.882988	0.140363	-6.29074	3.15952e-10	8.13885e-09
ENSG00000104369,5	56704	junctophilin 1 [Source:HGNC Symbol;Acc:HGNC:14201]	JPH1	51.8992	0.94878	0.150919	6.28667	3.24358e-10	8.34449e-09
ENSG00000143858,12	127833	synaptotagmin 2 [Source:HGNC Symbol;Acc:HGNC:11510]	SYT2	16.5363	-1.57299	0.250249	-6.2857	3.2639e-10	8.38584e-09
ENSG00000113621,14	79770	thioredoxin domain containing 15 [Source:HGNC Symbol;Acc:HGNC:20652]	TXNDC15	459.079	-0.336152	0.0534972	-6.28354	3.3095e-10	8.49195e-09
ENSG00000115361,8	33	acyl-CoA dehydrogenase long chain [Source:HGNC Symbol;Acc:HGNC:88]	ACADL	12.7597	1.55175	0.246964	6.2833	3.31465e-10	8.4941e-09
ENSG00000271122,1	NA	novel transcript	AC018647,2	371.257	0.358378	0.0571351	6.27247	3.55372e-10	9.09495e-09
ENSG00000137845,15	102	ADAM metallopeptidase domain 10 [Source:HGNC Symbol;Acc:HGNC:188]	ADAM10	1580.76	-0.405084	0.0645948	-6.27115	3.58385e-10	9.16018e-09
ENSG00000117450,14	5052	peroxiredoxin 1 [Source:HGNC Symbol;Acc:HGNC:9352]	PRDX1	994.262	0.308505	0.0492102	6.26912	3.63086e-10	9.26832e-09
ENSG00000119862,13	29094	galectin like [Source:HGNC Symbol;Acc:HGNC:25012]	LGALSL	285.429	-0.445947	0.0711364	-6.2689	3.63601e-10	9.26949e-09
ENSG00000182870,13	50614	polypeptide N-acetylgalactosaminyltransferase 9 [Source:HGNC Symbol;Acc:HGNC:4131]	GALNT9	61.3017	-1.65719	0.264423	-6.2672	3.67604e-10	9.35944e-09
ENSG00000067141,17	4756	neogenin 1 [Source:HGNC Symbol;Acc:HGNC:7754]	NEO1	634.838	-0.343087	0.0547693	-6.26422	3.74685e-10	9.52742e-09
ENSG00000185262,9	283991	UBA like domain containing 2 [Source:HGNC Symbol;Acc:HGNC:28438]	UBALD2	266.555	-0.640514	0.102309	-6.26061	3.83465e-10	9.73813e-09
ENSG00000143819,12	2052	epoxide hydrolase 1 [Source:HGNC Symbol;Acc:HGNC:3401]	EPHX1	292.208	-0.402899	0.0643679	-6.25932	3.86661e-10	9.80667e-09
ENSG00000136842,14	7111	tropomodulin 1 [Source:HGNC Symbol;Acc:HGNC:11871]	TMOD1	449.356	-0.39732	0.063508	-6.25621	3.94446e-10	9.99128e-09
ENSG00000189120,5	80320	Sp6 transcription factor [Source:HGNC Symbol;Acc:HGNC:14530]	SP6	51.8763	-1.33588	0.213538	-6.25593	3.95147e-10	9.99621e-09
ENSG00000111906,18	51020	HD domain containing 2 [Source:HGNC Symbol;Acc:HGNC:21078]	HDDC2	228.455	0.462875	0.0740381	6.25185	4.05624e-10	1.02481e-08
ENSG00000106078,19	23242	cordon-bleu WH2 repeat protein [Source:HGNC Symbol;Acc:HGNC:22199]	COBL	25.294	-1.33497	0.213592	-6.25012	4.1015e-10	1.03492e-08
ENSG00000106683,15	3984	LIM domain kinase 1 [Source:HGNC Symbol;Acc:HGNC:6613]	LIMK1	475.735	-0.5493	0.0879	-6.24915	4.12694e-10	1.04001e-08
ENSG00000182621,18	23236	phospholipase C beta 1 [Source:HGNC Symbol;Acc:HGNC:15917]	PLCB1	89.5436	-0.87013	0.139428	-6.24072	4.3556e-10	1.09623e-08
ENSG00000153485,5	26175	transmembrane protein 251 [Source:HGNC Symbol;Acc:HGNC:20218]	TMEM251	84.5615	0.70248	0.112633	6.2369	4.46317e-10	1.12188e-08
ENSG00000160285,15	4047	lanosterol synthase [Source:HGNC Symbol;Acc:HGNC:6708]	LSS	1054.95	-0.39629	0.0635564	-6.23525	4.51049e-10	1.13233e-08
ENSG00000179242,16	1002	cadherin 4 [Source:HGNC Symbol;Acc:HGNC:1763]	CDH4	832.731	-0.42824	0.0686981	-6.23366	4.55672e-10	1.14248e-08
ENSG00000164663,14	25862	ubiquitin specific peptidase 49 [Source:HGNC Symbol;Acc:HGNC:20078]	USP49	187.387	0.513914	0.0825086	6.22861	4.70598e-10	1.17841e-08
ENSG00000125355,15	55026	transmembrane protein 255A [Source:HGNC Symbol;Acc:HGNC:26086]	TMEM255A	266.881	-0.431309	0.0693973	-6.21507	5.13011e-10	1.28298e-08
ENSG00000111860,14	387119	centrosomal protein 85 like [Source:HGNC Symbol;Acc:HGNC:21638]	CEP85L	155.379	0.587867	0.0946737	6.2094	5.31858e-10	1.32843e-08
ENSG00000164574,16	55568	polypeptide N-acetylgalactosaminyltransferase 10 [Source:HGNC Symbol;Acc:HGNC:19873]	GALNT10	159.373	-0.611466	0.0985053	-6.20744	5.38552e-10	1.34345e-08
ENSG00000116793,16	10745	putative homeodomain transcription factor 1 [Source:HGNC Symbol;Acc:HGNC:8939]	PHTF1	212.399	0.432529	0.0697057	6.20507	5.46713e-10	1.36209e-08
ENSG00000188732,11	340277	family with sequence similarity 221 member A [Source:HGNC Symbol;Acc:HGNC:27977]	FAM221A	52.8486	0.961153	0.155038	6.19945	5.66616e-10	1.40989e-08
ENSG00000134871,19	1284	collagen type IV alpha 2 chain [Source:HGNC Symbol;Acc:HGNC:2203]	COL4A2	2769.52	-0.552752	0.0892479	-6.19344	5.88647e-10	1.46287e-08
ENSG00000167173,19	56905	chromosome 15 open reading frame 39 [Source:HGNC Symbol;Acc:HGNC:24497]	C15orf39	152.429	-0.779293	0.125923	-6.18864	6.06843e-10	1.50619e-08
ENSG00000160352,16	148206	zinc finger protein 714 [Source:HGNC Symbol;Acc:HGNC:27124]	ZNF714	430.918	0.397739	0.0642737	6.18821	6.08505e-10	1.50653e-08
ENSG00000187955,12	7373	collagen type XIV alpha 1 chain [Source:HGNC Symbol;Acc:HGNC:2191]	COL14A1	10.1843	2.01456	0.325541	6.18833	6.0806e-10	1.50653e-08
ENSG00000081181,8	384	arginase 2 [Source:HGNC Symbol;Acc:HGNC:664]	ARG2	165.042	0.545291	0.088217	6.18125	6.3598e-10	1.57258e-08
ENSG00000149403,12	2900	glutamate ionotropic receptor kainate type subunit 4 [Source:HGNC Symbol;Acc:HGNC:4582]	GRIK4	28.5072	-1.24524	0.201594	-6.17696	6.53481e-10	1.61383e-08
ENSG00000137343,18	79969	alpha tubulin acetyltransferase 1 [Source:HGNC Symbol;Acc:HGNC:21186]	ATAT1	177.994	0.525158	0.0850284	6.17626	6.56372e-10	1.61894e-08
ENSG00000100422,14	64781	ceramide kinase [Source:HGNC Symbol;Acc:HGNC:19256]	CERK	762.321	-0.286525	0.0464322	-6.17083	6.79329e-10	1.67347e-08
ENSG00000167601,12	558	AXL receptor tyrosine kinase [Source:HGNC Symbol;Acc:HGNC:905]	AXL	261.637	-0.406593	0.0659611	-6.16413	7.08704e-10	1.74149e-08
ENSG00000233427,1	NA	novel transcript	AL009181,1	5.22089	2.44739	0.397034	6.16418	7.08489e-10	1.74149e-08
ENSG00000144749,13	26018	leucine rich repeats and immunoglobulin like domains 1 [Source:HGNC Symbol;Acc:HGNC:17360]	LRIG1	1402.45	-0.24446	0.039661	-6.16373	7.1053e-10	1.7438e-08
ENSG00000109265,14	57482	KIAA1211 [Source:HGNC Symbol;Acc:HGNC:29219]	KIAA1211	106.189	-0.665038	0.107908	-6.16299	7.13822e-10	1.74971e-08
ENSG00000177084,17	5426	DNA polymerase epsilon, catalytic subunit [Source:HGNC Symbol;Acc:HGNC:9177]	POLE	706.212	0.428975	0.0696298	6.1608	7.23775e-10	1.7719e-08
ENSG00000241111,1	NA	novel transcript	AC092040,1	232.151	-0.447998	0.0727692	-6.15642	7.44089e-10	1.81938e-08
ENSG00000151276,23	9223	membrane associated guanylate kinase, WW and PDZ domain containing 1 [Source:HGNC Symbol;Acc:HGNC:946]	MAGI1	419.164	-0.368307	0.0598332	-6.15556	7.48111e-10	1.82695e-08
ENSG00000062524,16	4058	leukocyte receptor tyrosine kinase [Source:HGNC Symbol;Acc:HGNC:6721]	LTK	22.5192	-1.77203	0.287896	-6.1551	7.50297e-10	1.83002e-08
ENSG00000117906,14	5955	reticulocalbin 2 [Source:HGNC Symbol;Acc:HGNC:9935]	RCN2	827.989	-0.474084	0.0770463	-6.15323	7.59189e-10	1.84729e-08
ENSG00000166750,10	162394	schlafen family member 5 [Source:HGNC Symbol;Acc:HGNC:28286]	SLFN5	305.606	-0.551308	0.0895967	-6.15322	7.5925e-10	1.84729e-08
ENSG00000123374,11	1017	cyclin dependent kinase 2 [Source:HGNC Symbol;Acc:HGNC:1771]	CDK2	684.728	0.308551	0.0502101	6.14519	7.987e-10	1.94088e-08
ENSG00000136859,10	23452	angiopoietin like 2 [Source:HGNC Symbol;Acc:HGNC:490]	ANGPTL2	155.066	-0.554259	0.0902092	-6.14415	8.03928e-10	1.94879e-08
ENSG00000175928,6	57633	leucine rich repeat neuronal 1 [Source:HGNC Symbol;Acc:HGNC:20980]	LRRN1	423.961	0.418118	0.0680497	6.1443	8.03171e-10	1.94879e-08
ENSG00000014914,21	10903	myotubularin related protein 11 [Source:HGNC Symbol;Acc:HGNC:24307]	MTMR11	242.107	-0.450317	0.0733016	-6.14335	8.08013e-10	1.95628e-08
ENSG00000223501,9	6293	VPS52 subunit of GARP complex [Source:HGNC Symbol;Acc:HGNC:10518]	VPS52	565.438	0.299505	0.0487648	6.14183	8.15783e-10	1.97268e-08
ENSG00000103257,9	8140	solute carrier family 7 member 5 [Source:HGNC Symbol;Acc:HGNC:11063]	SLC7A5	701.606	-0.682998	0.111351	-6.13374	8.58362e-10	2.0731e-08
ENSG00000197410,14	54798	dachsous cadherin-related 2 [Source:HGNC Symbol;Acc:HGNC:23111]	DCHS2	17.4223	1.32305	0.215803	6.13083	8.74222e-10	2.10882e-08
ENSG00000118689,15	2309	forkhead box O3 [Source:HGNC Symbol;Acc:HGNC:3821]	FOXO3	514.897	0.300836	0.0490994	6.12707	8.9513e-10	2.15658e-08
ENSG00000135144,7	1840	deltex E3 ubiquitin ligase 1 [Source:HGNC Symbol;Acc:HGNC:3060]	DTX1	39.1111	-1.11812	0.182494	-6.12688	8.96207e-10	2.15658e-08
ENSG00000279569,1	NA	novel transcript	AC020763,4	522.531	-0.675217	0.110232	-6.12543	9.04386e-10	2.17361e-08
ENSG00000123636,18	29994	bromodomain adjacent to zinc finger domain 2B [Source:HGNC Symbol;Acc:HGNC:963]	BAZ2B	445.039	0.403437	0.0660213	6.11071	9.91905e-10	2.38105e-08
ENSG00000165475,15	51084	crystallin lambda 1 [Source:HGNC Symbol;Acc:HGNC:18246]	CRYL1	158.539	-0.509379	0.0833896	-6.10843	1.00616e-09	2.41234e-08
ENSG00000165490,13	220042	DNA damage induced apoptosis suppressor [Source:HGNC Symbol;Acc:HGNC:26351]	DDIAS	240.7	0.443728	0.0727257	6.10139	1.05151e-09	2.51801e-08
ENSG00000162772,17	467	activating transcription factor 3 [Source:HGNC Symbol;Acc:HGNC:785]	ATF3	159.119	-0.531888	0.0873218	-6.09113	1.12117e-09	2.68156e-08
ENSG00000204209,13	1616	death domain associated protein [Source:HGNC Symbol;Acc:HGNC:2681]	DAXX	528.602	0.309454	0.0508058	6.09093	1.12255e-09	2.68162e-08
ENSG00000119682,17	9870	apoptosis resistant E3 ubiquitin protein ligase 1 [Source:HGNC Symbol;Acc:HGNC:20363]	AREL1	557.408	0.306454	0.0503491	6.08658	1.15344e-09	2.75209e-08
ENSG00000227279,1	NA	novel transcript, antisense to CDH2	AC110015,1	184.272	-0.520413	0.0855274	-6.08475	1.16677e-09	2.78051e-08
ENSG00000151364,17	65987	potassium channel tetramerization domain containing 14 [Source:HGNC Symbol;Acc:HGNC:23295]	KCTD14	41.2437	0.803392	0.132161	6.07888	1.21029e-09	2.88074e-08
ENSG00000279159,1	NA	novel transcript, antisense to MTMR3	AC003681,1	610.082	-0.274835	0.0452156	-6.07833	1.2144e-09	2.88706e-08
ENSG00000052126,14	54477	pleckstrin homology domain containing A5 [Source:HGNC Symbol;Acc:HGNC:30036]	PLEKHA5	52.3908	-1.02692	0.169078	-6.07366	1.25028e-09	2.96878e-08
ENSG00000134247,10	5738	prostaglandin F2 receptor inhibitor [Source:HGNC Symbol;Acc:HGNC:9601]	PTGFRN	1087.97	-0.206545	0.034091	-6.05865	1.37272e-09	3.25559e-08
ENSG00000122584,13	30010	neurexophilin 1 [Source:HGNC Symbol;Acc:HGNC:20693]	NXPH1	235.84	0.410718	0.0677963	6.05811	1.37731e-09	3.26257e-08
ENSG00000082438,17	22837	cordon-bleu WH2 repeat protein like 1 [Source:HGNC Symbol;Acc:HGNC:23571]	COBLL1	134.659	0.564777	0.0932427	6.05707	1.38626e-09	3.27982e-08
ENSG00000214595,11	400954	EMAP like 6 [Source:HGNC Symbol;Acc:HGNC:35412]	EML6	127.802	-0.678529	0.11219	-6.04801	1.46646e-09	3.4654e-08
ENSG00000198042,11	84549	MAK16 homolog [Source:HGNC Symbol;Acc:HGNC:13703]	MAK16	267.611	0.419232	0.0693879	6.04186	1.5235e-09	3.5959e-08
ENSG00000182985,17	23705	cell adhesion molecule 1 [Source:HGNC Symbol;Acc:HGNC:5951]	CADM1	775.676	-0.357533	0.0591869	-6.04075	1.53398e-09	3.6163e-08
ENSG00000157259,8	57798	GATA zinc finger domain containing 1 [Source:HGNC Symbol;Acc:HGNC:29941]	GATAD1	686.62	0.295668	0.0489661	6.03821	1.55829e-09	3.66924e-08
ENSG00000004700,16	5965	RecQ like helicase [Source:HGNC Symbol;Acc:HGNC:9948]	RECQL	709.48	0.35185	0.0582856	6.03666	1.57341e-09	3.70043e-08
ENSG00000258666,1	NA	novel transcript, antisense to WARS	AL157871,4	99.846	0.734815	0.121745	6.0357	1.58277e-09	3.71799e-08
ENSG00000136758,18	10730	YME1 like 1 ATPase [Source:HGNC Symbol;Acc:HGNC:12843]	YME1L1	1991.5	0.296045	0.0491046	6.02887	1.65114e-09	3.87399e-08
ENSG00000003147,19	3382	islet cell autoantigen 1 [Source:HGNC Symbol;Acc:HGNC:5343]	ICA1	119.315	-0.578195	0.0959128	-6.02833	1.65658e-09	3.88213e-08
ENSG00000160191,18	5152	phosphodiesterase 9A [Source:HGNC Symbol;Acc:HGNC:8795]	PDE9A	134.884	-0.69148	0.114756	-6.02567	1.68414e-09	3.94204e-08
ENSG00000156475,18	5521	protein phosphatase 2 regulatory subunit Bbeta [Source:HGNC Symbol;Acc:HGNC:9305]	PPP2R2B	160.141	-0.488483	0.0811685	-6.01813	1.76441e-09	4.12503e-08
ENSG00000267469,1	NA	novel transcript, antisense to AES	AC005944,1	837.204	-0.385595	0.0640818	-6.01723	1.77431e-09	4.14327e-08
ENSG00000106462,10	2146	enhancer of zeste 2 polycomb repressive complex 2 subunit [Source:HGNC Symbol;Acc:HGNC:3527]	EZH2	947.52	0.324737	0.0540121	6.01231	1.82902e-09	4.26599e-08
ENSG00000107625,13	79009	DExD-box helicase 50 [Source:HGNC Symbol;Acc:HGNC:17906]	DDX50	439.617	0.392434	0.0652825	6.01132	1.84022e-09	4.28703e-08
ENSG00000101417,12	11264	peroxisomal membrane protein 4 [Source:HGNC Symbol;Acc:HGNC:15920]	PXMP4	368.561	-0.379403	0.0631219	-6.01065	1.84786e-09	4.29976e-08
ENSG00000001036,14	2519	alpha-L-fucosidase 2 [Source:HGNC Symbol;Acc:HGNC:4008]	FUCA2	541.659	0.311868	0.0519226	6.00641	1.89677e-09	4.40837e-08
ENSG00000140612,14	23478	SEC11 homolog A, signal peptidase complex subunit [Source:HGNC Symbol;Acc:HGNC:17718]	SEC11A	813.317	-0.35502	0.0591113	-6.00596	1.90204e-09	4.41543e-08
ENSG00000124459,12	7596	zinc finger protein 45 [Source:HGNC Symbol;Acc:HGNC:13111]	ZNF45	360.586	0.400645	0.066726	6.00434	1.92109e-09	4.45439e-08
ENSG00000149100,13	10480	eukaryotic translation initiation factor 3 subunit M [Source:HGNC Symbol;Acc:HGNC:24460]	EIF3M	942.572	0.375126	0.0624826	6.00368	1.9289e-09	4.46726e-08
ENSG00000106144,20	835	caspase 2 [Source:HGNC Symbol;Acc:HGNC:1503]	CASP2	859.016	0.282185	0.0470167	6.00181	1.95135e-09	4.51395e-08
ENSG00000144746,7	10550	ADP ribosylation factor like GTPase 6 interacting protein 5 [Source:HGNC Symbol;Acc:HGNC:16937]	ARL6IP5	509.293	-0.392266	0.0653812	-5.99968	1.97708e-09	4.56811e-08
ENSG00000130741,11	1968	eukaryotic translation initiation factor 2 subunit gamma [Source:HGNC Symbol;Acc:HGNC:3267]	EIF2S3	815.867	0.267872	0.0446851	5.99466	2.03916e-09	4.70606e-08
ENSG00000152404,15	143884	CWF19 like cell cycle control factor 2 [Source:HGNC Symbol;Acc:HGNC:26508]	CWF19L2	107.37	0.6217	0.103734	5.99321	2.05737e-09	4.74253e-08
ENSG00000139579,13	79035	nucleic acid binding protein 2 [Source:HGNC Symbol;Acc:HGNC:28412]	NABP2	430.753	0.363524	0.0606723	5.9916	2.07782e-09	4.78408e-08
ENSG00000100749,8	7443	VRK serine/threonine kinase 1 [Source:HGNC Symbol;Acc:HGNC:12718]	VRK1	325.271	0.37946	0.063373	5.98773	2.12789e-09	4.89366e-08
ENSG00000104313,20	2138	EYA transcriptional coactivator and phosphatase 1 [Source:HGNC Symbol;Acc:HGNC:3519]	EYA1	130.43	0.543851	0.090834	5.98731	2.13346e-09	4.90074e-08
ENSG00000133872,14	51669	store-operated calcium entry associated regulatory factor [Source:HGNC Symbol;Acc:HGNC:28789]	SARAF	1319.83	-0.326503	0.0545518	-5.98518	2.16146e-09	4.95928e-08
ENSG00000135631,16	26056	RAB11 family interacting protein 5 [Source:HGNC Symbol;Acc:HGNC:24845]	RAB11FIP5	48.6638	-1.09754	0.183554	-5.97938	2.23985e-09	5.13318e-08
ENSG00000155792,10	64798	DEP domain containing MTOR interacting protein [Source:HGNC Symbol;Acc:HGNC:22953]	DEPTOR	6.80746	2.48204	0.415899	5.96788	2.4035e-09	5.50184e-08
ENSG00000130309,11	79709	collagen beta(1-O)galactosyltransferase 1 [Source:HGNC Symbol;Acc:HGNC:26182]	COLGALT1	1663.31	-0.371704	0.0623232	-5.96413	2.45939e-09	5.62326e-08
ENSG00000139182,15	9746	calsyntenin 3 [Source:HGNC Symbol;Acc:HGNC:18371]	CLSTN3	160.859	-0.51051	0.0856132	-5.96298	2.47681e-09	5.65654e-08
ENSG00000204592,9	3133	major histocompatibility complex, class I, E [Source:HGNC Symbol;Acc:HGNC:4962]	HLA-E	221.632	-0.484705	0.0813441	-5.9587	2.54246e-09	5.79975e-08
ENSG00000100504,17	5836	glycogen phosphorylase L [Source:HGNC Symbol;Acc:HGNC:9725]	PYGL	557.969	0.438326	0.0735796	5.95717	2.56647e-09	5.84775e-08
ENSG00000134569,10	4038	LDL receptor related protein 4 [Source:HGNC Symbol;Acc:HGNC:6696]	LRP4	696.073	0.304701	0.0511858	5.95284	2.63531e-09	5.99769e-08
ENSG00000115295,20	79745	CAP-Gly domain containing linker protein family member 4 [Source:HGNC Symbol;Acc:HGNC:26108]	CLIP4	42.262	-1.17936	0.198173	-5.95116	2.66244e-09	6.05246e-08
ENSG00000117593,12	55157	aspartyl-tRNA synthetase 2, mitochondrial [Source:HGNC Symbol;Acc:HGNC:25538]	DARS2	283.578	0.382827	0.0643525	5.94891	2.69942e-09	6.12944e-08
ENSG00000106028,11	6742	single stranded DNA binding protein 1 [Source:HGNC Symbol;Acc:HGNC:11317]	SSBP1	739.711	0.387605	0.0651681	5.94778	2.7181e-09	6.16477e-08
ENSG00000219410,6	NA	novel transcript	AC125494,1	253.87	0.377482	0.0635076	5.94388	2.7835e-09	6.30587e-08
ENSG00000125170,11	55715	docking protein 4 [Source:HGNC Symbol;Acc:HGNC:19868]	DOK4	83.8485	-0.617998	0.103995	-5.94256	2.80598e-09	6.3495e-08
ENSG00000255717,7	23642	small nucleolar RNA host gene 1 [Source:HGNC Symbol;Acc:HGNC:32688]	SNHG1	725.632	0.305087	0.0513561	5.94062	2.8394e-09	6.41776e-08
ENSG00000100129,18	51386	eukaryotic translation initiation factor 3 subunit L [Source:HGNC Symbol;Acc:HGNC:18138]	EIF3L	1603.83	-0.281694	0.0474345	-5.93858	2.87498e-09	6.49075e-08
ENSG00000230749,5	NA	MEIS1 antisense RNA 2 [Source:HGNC Symbol;Acc:HGNC:40370]	MEIS1-AS2	74.091	-0.722096	0.121599	-5.93836	2.8788e-09	6.49194e-08
ENSG00000072682,18	8974	prolyl 4-hydroxylase subunit alpha 2 [Source:HGNC Symbol;Acc:HGNC:8547]	P4HA2	182.062	-0.62676	0.105565	-5.93719	2.89957e-09	6.52386e-08
ENSG00000100292,17	3162	heme oxygenase 1 [Source:HGNC Symbol;Acc:HGNC:5013]	HMOX1	64.4751	-0.932042	0.156981	-5.93728	2.89792e-09	6.52386e-08
ENSG00000041802,11	55341	large 60S subunit nuclear export GTPase 1 [Source:HGNC Symbol;Acc:HGNC:25652]	LSG1	669.118	0.266864	0.0449695	5.93435	2.95021e-09	6.63024e-08
ENSG00000176890,16	7298	thymidylate synthetase [Source:HGNC Symbol;Acc:HGNC:12441]	TYMS	1476.69	0.232572	0.0391926	5.93407	2.95515e-09	6.6338e-08
ENSG00000100632,11	2079	ERH mRNA splicing and mitosis factor [Source:HGNC Symbol;Acc:HGNC:3447]	ERH	1298.66	0.320158	0.0539576	5.93351	2.96522e-09	6.64883e-08
ENSG00000108861,9	1845	dual specificity phosphatase 3 [Source:HGNC Symbol;Acc:HGNC:3069]	DUSP3	441.136	-0.344741	0.0581342	-5.93008	3.02779e-09	6.78142e-08
ENSG00000104381,13	54332	ganglioside induced differentiation associated protein 1 [Source:HGNC Symbol;Acc:HGNC:15968]	GDAP1	389.25	0.385052	0.064982	5.92551	3.1132e-09	6.96482e-08
ENSG00000198056,15	5557	DNA primase subunit 1 [Source:HGNC Symbol;Acc:HGNC:9369]	PRIM1	169.859	0.482389	0.0814395	5.92328	3.15575e-09	7.05202e-08
ENSG00000166197,16	9221	nucleolar and coiled-body phosphoprotein 1 [Source:HGNC Symbol;Acc:HGNC:15608]	NOLC1	949.119	0.274045	0.0462944	5.91961	3.22706e-09	7.20321e-08
ENSG00000157833,13	150946	GRB2 associated regulator of MAPK1 subtype 2 [Source:HGNC Symbol;Acc:HGNC:27172]	GAREM2	118.5	-0.516005	0.0871764	-5.9191	3.23715e-09	7.21756e-08
ENSG00000177606,7	3725	Jun proto-oncogene, AP-1 transcription factor subunit [Source:HGNC Symbol;Acc:HGNC:6204]	JUN	2217.66	-0.43487	0.0735017	-5.91646	3.28939e-09	7.32577e-08
ENSG00000235237,1	NA	novel transcript	Z82188,2	50.6351	-0.859732	0.14546	-5.91045	3.41165e-09	7.58948e-08
ENSG00000185787,15	10933	mortality factor 4 like 1 [Source:HGNC Symbol;Acc:HGNC:16989]	MORF4L1	1287.1	-0.402007	0.0680505	-5.90749	3.47369e-09	7.71879e-08
ENSG00000128654,14	10651	metaxin 2 [Source:HGNC Symbol;Acc:HGNC:7506]	MTX2	166.432	0.440187	0.0745571	5.90403	3.54736e-09	7.87362e-08
ENSG00000101190,13	10732	transcription factor like 5 [Source:HGNC Symbol;Acc:HGNC:11646]	TCFL5	384.909	-0.340388	0.057662	-5.90316	3.56603e-09	7.90616e-08
ENSG00000165323,15	120114	FAT atypical cadherin 3 [Source:HGNC Symbol;Acc:HGNC:23112]	FAT3	1385.08	-0.276552	0.0469231	-5.89373	3.77567e-09	8.36157e-08
ENSG00000133226,17	10250	serine and arginine repetitive matrix 1 [Source:HGNC Symbol;Acc:HGNC:16638]	SRRM1	806.653	-0.267519	0.0454015	-5.89229	3.80876e-09	8.4254e-08
ENSG00000011376,12	23395	leucyl-tRNA synthetase 2, mitochondrial [Source:HGNC Symbol;Acc:HGNC:17095]	LARS2	257.67	-0.421376	0.0715464	-5.88955	3.8726e-09	8.54744e-08
ENSG00000105612,9	1777	deoxyribonuclease 2, lysosomal [Source:HGNC Symbol;Acc:HGNC:2960]	DNASE2	329.225	-0.407286	0.0691526	-5.88966	3.8698e-09	8.54744e-08
ENSG00000151693,11	8853	ArfGAP with SH3 domain, ankyrin repeat and PH domain 2 [Source:HGNC Symbol;Acc:HGNC:2721]	ASAP2	365.55	-0.364973	0.0619934	-5.88729	3.92576e-09	8.6551e-08
ENSG00000112238,11	59336	PR/SET domain 13 [Source:HGNC Symbol;Acc:HGNC:13998]	PRDM13	12.541	1.54815	0.26304	5.88559	3.96628e-09	8.73468e-08
ENSG00000272142,3	NA	novel transcript	AL359643,3	50.7125	0.711548	0.120987	5.88118	4.0736e-09	8.96102e-08
ENSG00000127884,5	1892	enoyl-CoA hydratase, short chain 1 [Source:HGNC Symbol;Acc:HGNC:3151]	ECHS1	231.51	-0.431084	0.073343	-5.87765	4.1614e-09	9.13761e-08
ENSG00000153179,13	283349	Ras association domain family member 3 [Source:HGNC Symbol;Acc:HGNC:14271]	RASSF3	43.8427	0.761892	0.129627	5.87758	4.16314e-09	9.13761e-08
ENSG00000171793,16	1503	CTP synthase 1 [Source:HGNC Symbol;Acc:HGNC:2519]	CTPS1	399.267	0.300682	0.0511919	5.87362	4.2638e-09	9.34815e-08
ENSG00000171604,12	51523	CXXC finger protein 5 [Source:HGNC Symbol;Acc:HGNC:26943]	CXXC5	633.975	-0.411283	0.0700293	-5.87301	4.27951e-09	9.37216e-08
ENSG00000020577,13	23034	sterile alpha motif domain containing 4A [Source:HGNC Symbol;Acc:HGNC:23023]	SAMD4A	363.291	0.348991	0.05944	5.87132	4.32342e-09	9.45784e-08
ENSG00000001631,15	889	KRIT1 ankyrin repeat containing [Source:HGNC Symbol;Acc:HGNC:1573]	KRIT1	127.98	0.551095	0.093888	5.86971	4.3655e-09	9.53933e-08
ENSG00000124839,13	64284	RAB17, member RAS oncogene family [Source:HGNC Symbol;Acc:HGNC:16523]	RAB17	7.04494	2.27661	0.387972	5.86798	4.41145e-09	9.62906e-08
ENSG00000198961,10	9867	praja ring finger ubiquitin ligase 2 [Source:HGNC Symbol;Acc:HGNC:17481]	PJA2	4381.17	-0.344608	0.0588104	-5.85965	4.63839e-09	1.01132e-07
ENSG00000170390,16	166614	doublecortin like kinase 2 [Source:HGNC Symbol;Acc:HGNC:19002]	DCLK2	416.522	-0.288699	0.0492784	-5.85853	4.66976e-09	1.01704e-07
ENSG00000108021,20	54906	transcription activation suppressor family member 2 [Source:HGNC Symbol;Acc:HGNC:23484]	TASOR2	1011.31	0.286228	0.0488779	5.85598	4.74213e-09	1.03166e-07
ENSG00000113721,14	5159	platelet derived growth factor receptor beta [Source:HGNC Symbol;Acc:HGNC:8804]	PDGFRB	65.3322	-0.777727	0.132864	-5.85355	4.81192e-09	1.04569e-07
ENSG00000176533,13	2788	G protein subunit gamma 7 [Source:HGNC Symbol;Acc:HGNC:4410]	GNG7	858.966	-0.426385	0.0728759	-5.85083	4.89121e-09	1.06175e-07
ENSG00000204713,11	5987	tripartite motif containing 27 [Source:HGNC Symbol;Acc:HGNC:9975]	TRIM27	509.407	0.312134	0.0534014	5.84505	5.06415e-09	1.09809e-07
ENSG00000198625,13	4194	MDM4 regulator of p53 [Source:HGNC Symbol;Acc:HGNC:6974]	MDM4	390.997	0.379841	0.0650061	5.84316	5.12209e-09	1.10943e-07
ENSG00000169410,10	5780	protein tyrosine phosphatase non-receptor type 9 [Source:HGNC Symbol;Acc:HGNC:9661]	PTPN9	443.292	-0.31072	0.0532042	-5.84015	5.21532e-09	1.12838e-07
ENSG00000110344,9	9354	ubiquitination factor E4A [Source:HGNC Symbol;Acc:HGNC:12499]	UBE4A	688.467	0.29917	0.0513153	5.83004	5.54156e-09	1.19766e-07
ENSG00000164056,11	10252	sprouty RTK signaling antagonist 1 [Source:HGNC Symbol;Acc:HGNC:11269]	SPRY1	619.224	-0.313095	0.0537107	-5.82928	5.56671e-09	1.20178e-07
ENSG00000128928,10	3712	isovaleryl-CoA dehydrogenase [Source:HGNC Symbol;Acc:HGNC:6186]	IVD	560.243	-0.279697	0.0479842	-5.82894	5.57822e-09	1.20294e-07
ENSG00000107295,10	6456	SH3 domain containing GRB2 like 2, endophilin A1 [Source:HGNC Symbol;Acc:HGNC:10831]	SH3GL2	27.7598	-1.02624	0.176132	-5.82657	5.65793e-09	1.2188e-07
ENSG00000188313,13	5359	phospholipid scramblase 1 [Source:HGNC Symbol;Acc:HGNC:9092]	PLSCR1	211.623	0.387069	0.0664484	5.8251	5.70774e-09	1.22819e-07
ENSG00000172201,12	3400	inhibitor of DNA binding 4, HLH protein [Source:HGNC Symbol;Acc:HGNC:5363]	ID4	514.297	-0.392375	0.0674502	-5.81725	5.9822e-09	1.28585e-07
ENSG00000188549,12	388115	coiled-coil domain containing 9B [Source:HGNC Symbol;Acc:HGNC:33488]	CCDC9B	443.992	-0.419474	0.0721572	-5.81333	6.12416e-09	1.31493e-07
ENSG00000232098,3	NA	novel transcript	AC012313,1	133.524	0.49868	0.0857863	5.81306	6.13422e-09	1.31566e-07
ENSG00000119616,11	51077	FCF1 rRNA-processing protein [Source:HGNC Symbol;Acc:HGNC:20220]	FCF1	387.526	0.313196	0.0539098	5.80964	6.26085e-09	1.3399e-07
ENSG00000159128,14	3460	interferon gamma receptor 2 [Source:HGNC Symbol;Acc:HGNC:5440]	IFNGR2	420.399	-0.360297	0.0620152	-5.80981	6.25433e-09	1.3399e-07
ENSG00000006652,14	3475	interferon related developmental regulator 1 [Source:HGNC Symbol;Acc:HGNC:5456]	IFRD1	477.713	0.333404	0.0574631	5.80205	6.55086e-09	1.40045e-07
ENSG00000144381,17	3329	heat shock protein family D (Hsp60) member 1 [Source:HGNC Symbol;Acc:HGNC:5261]	HSPD1	2548.21	0.334685	0.0577164	5.79879	6.67959e-09	1.42607e-07
ENSG00000163638,13	56999	ADAM metallopeptidase with thrombospondin type 1 motif 9 [Source:HGNC Symbol;Acc:HGNC:13202]	ADAMTS9	910.541	-0.305405	0.0526682	-5.79865	6.68515e-09	1.42607e-07
ENSG00000143797,12	129642	membrane bound O-acyltransferase domain containing 2 [Source:HGNC Symbol;Acc:HGNC:25193]	MBOAT2	567.25	-0.38288	0.0660439	-5.79735	6.73716e-09	1.43561e-07
ENSG00000118515,11	6446	serum/glucocorticoid regulated kinase 1 [Source:HGNC Symbol;Acc:HGNC:10810]	SGK1	142.45	-0.515417	0.0889914	-5.79176	6.96523e-09	1.48261e-07
ENSG00000171055,15	9637	fasciculation and elongation protein zeta 2 [Source:HGNC Symbol;Acc:HGNC:3660]	FEZ2	770.46	-0.407018	0.0702844	-5.79102	6.99614e-09	1.48758e-07
ENSG00000072274,13	7037	transferrin receptor [Source:HGNC Symbol;Acc:HGNC:11763]	TFRC	1262.21	-0.441698	0.0763114	-5.78809	7.11894e-09	1.51207e-07
ENSG00000105290,12	333	amyloid beta precursor like protein 1 [Source:HGNC Symbol;Acc:HGNC:597]	APLP1	643.255	-0.396538	0.0685342	-5.78599	7.20869e-09	1.52948e-07
ENSG00000242485,6	55052	mitochondrial ribosomal protein L20 [Source:HGNC Symbol;Acc:HGNC:14478]	MRPL20	256.613	0.441002	0.0762785	5.78147	7.40495e-09	1.56944e-07
ENSG00000123146,20	976	adhesion G protein-coupled receptor E5 [Source:HGNC Symbol;Acc:HGNC:1711]	ADGRE5	556.765	-0.377455	0.0652967	-5.78061	7.44304e-09	1.57582e-07
ENSG00000131389,17	6533	solute carrier family 6 member 6 [Source:HGNC Symbol;Acc:HGNC:11052]	SLC6A6	133.559	-1.48988	0.257747	-5.78041	7.45202e-09	1.57603e-07
ENSG00000131378,14	23180	raftlin, lipid raft linker 1 [Source:HGNC Symbol;Acc:HGNC:30278]	RFTN1	183.595	-0.411032	0.0711306	-5.77855	7.53493e-09	1.59185e-07
ENSG00000253983,3	NA	novel transcript	AC087627,1	25.6239	1.12413	0.194811	5.77033	7.91174e-09	1.66967e-07
ENSG00000134283,18	51535	periphilin 1 [Source:HGNC Symbol;Acc:HGNC:19369]	PPHLN1	428.423	0.357325	0.0619401	5.76888	7.97999e-09	1.68228e-07
ENSG00000162086,15	7627	zinc finger protein 75a [Source:HGNC Symbol;Acc:HGNC:13146]	ZNF75A	252.37	0.408359	0.0708509	5.76364	8.23202e-09	1.73356e-07
ENSG00000153253,18	6328	sodium voltage-gated channel alpha subunit 3 [Source:HGNC Symbol;Acc:HGNC:10590]	SCN3A	23.1933	-0.974645	0.169132	-5.76262	8.28166e-09	1.74215e-07
ENSG00000139726,11	8562	density regulated re-initiation and release factor [Source:HGNC Symbol;Acc:HGNC:2769]	DENR	535.433	0.332672	0.0577319	5.76237	8.29427e-09	1.74294e-07
ENSG00000170270,5	84520	GON7 subunit of KEOPS complex [Source:HGNC Symbol;Acc:HGNC:20356]	GON7	83.7546	0.621883	0.107943	5.76124	8.34989e-09	1.75277e-07
ENSG00000108830,10	8153	Rho family GTPase 2 [Source:HGNC Symbol;Acc:HGNC:18315]	RND2	15.7549	-1.71471	0.297675	-5.76034	8.3946e-09	1.76028e-07
ENSG00000154059,11	55364	impact RWD domain protein [Source:HGNC Symbol;Acc:HGNC:20387]	IMPACT	225.007	-0.486064	0.0844423	-5.75617	8.60461e-09	1.8024e-07
ENSG00000048028,11	57646	ubiquitin specific peptidase 28 [Source:HGNC Symbol;Acc:HGNC:12625]	USP28	267.003	0.406809	0.0707069	5.75345	8.74399e-09	1.82965e-07
ENSG00000101361,17	10528	NOP56 ribonucleoprotein [Source:HGNC Symbol;Acc:HGNC:15911]	NOP56	566.338	0.274632	0.0477401	5.75265	8.78529e-09	1.83635e-07
ENSG00000108448,21	147166	tripartite motif containing 16 like [Source:HGNC Symbol;Acc:HGNC:32670]	TRIM16L	77.516	-0.66359	0.115374	-5.75161	8.83952e-09	1.84573e-07
ENSG00000100722,20	79882	zinc finger CCCH-type containing 14 [Source:HGNC Symbol;Acc:HGNC:20509]	ZC3H14	956.937	0.35244	0.0612821	5.75111	8.8662e-09	1.84934e-07
ENSG00000004776,13	126393	heat shock protein family B (small) member 6 [Source:HGNC Symbol;Acc:HGNC:26511]	HSPB6	19.8942	-1.40309	0.244026	-5.74978	8.93574e-09	1.86188e-07
ENSG00000225988,1	NA	LAMP5 antisense RNA 1 [Source:HGNC Symbol;Acc:HGNC:40754]	LAMP5-AS1	22.0007	1.07453	0.186907	5.74904	8.97516e-09	1.86812e-07
ENSG00000096384,20	3326	heat shock protein 90 alpha family class B member 1 [Source:HGNC Symbol;Acc:HGNC:5258]	HSP90AB1	9929.6	0.245066	0.0426455	5.74658	9.1064e-09	1.89145e-07
ENSG00000168395,15	84289	inhibitor of growth family member 5 [Source:HGNC Symbol;Acc:HGNC:19421]	ING5	307.949	0.337174	0.0586721	5.74674	9.09784e-09	1.89145e-07
ENSG00000213614,9	3073	hexosaminidase subunit alpha [Source:HGNC Symbol;Acc:HGNC:4878]	HEXA	385.457	-0.340849	0.0593322	-5.74476	9.20528e-09	1.90997e-07
ENSG00000162373,13	79656	BEN domain containing 5 [Source:HGNC Symbol;Acc:HGNC:25668]	BEND5	314.15	-0.500984	0.0872549	-5.74162	9.37777e-09	1.94372e-07
ENSG00000187514,16	5757	prothymosin alpha [Source:HGNC Symbol;Acc:HGNC:9623]	PTMA	2856.27	0.28868	0.0503351	5.73516	9.74202e-09	2.0171e-07
ENSG00000140694,17	5073	poly(A)-specific ribonuclease [Source:HGNC Symbol;Acc:HGNC:8609]	PARN	504.484	0.298577	0.0520655	5.73464	9.7717e-09	2.02112e-07
ENSG00000007171,18	4843	nitric oxide synthase 2 [Source:HGNC Symbol;Acc:HGNC:7873]	NOS2	488.465	-0.395211	0.0689315	-5.73339	9.84435e-09	2.03393e-07
ENSG00000126351,12	7067	thyroid hormone receptor alpha [Source:HGNC Symbol;Acc:HGNC:11796]	THRA	663.436	-0.359825	0.0627614	-5.73322	9.85421e-09	2.03393e-07
ENSG00000034510,6	9168	thymosin beta 10 [Source:HGNC Symbol;Acc:HGNC:11879]	TMSB10	7458.65	-0.402093	0.0701515	-5.73177	9.93861e-09	2.0492e-07
ENSG00000167460,17	7171	tropomyosin 4 [Source:HGNC Symbol;Acc:HGNC:12013]	TPM4	5123.11	0.208224	0.0363369	5.73036	1.00216e-08	2.06206e-07
ENSG00000234661,2	NA	CHL1 antisense RNA 1 [Source:HGNC Symbol;Acc:HGNC:40148]	CHL1-AS1	59.7891	-0.79392	0.138546	-5.73036	1.00219e-08	2.06206e-07
ENSG00000173113,6	51504	tRNA methyltransferase subunit 11-2 [Source:HGNC Symbol;Acc:HGNC:26940]	TRMT112	371.686	0.40721	0.0710715	5.72959	1.00674e-08	2.06927e-07
ENSG00000178202,13	143888	protein O-glucosyltransferase 3 [Source:HGNC Symbol;Acc:HGNC:28496]	POGLUT3	731.299	0.279096	0.048726	5.72786	1.01704e-08	2.08826e-07
ENSG00000113712,18	1452	casein kinase 1 alpha 1 [Source:HGNC Symbol;Acc:HGNC:2451]	CSNK1A1	897.505	-0.251859	0.0439792	-5.72677	1.02363e-08	2.09961e-07
ENSG00000107957,16	9644	SH3 and PX domains 2A [Source:HGNC Symbol;Acc:HGNC:23664]	SH3PXD2A	116.039	-0.57969	0.101278	-5.72378	1.04183e-08	2.13471e-07
ENSG00000239922,2	NA	novel transcript	AC092958,1	184.106	-0.4789	0.0838191	-5.7135	1.10678e-08	2.26546e-07
ENSG00000160818,16	54865	G-patch domain containing 4 [Source:HGNC Symbol;Acc:HGNC:25982]	GPATCH4	207.369	0.428083	0.0749421	5.71219	1.11533e-08	2.2806e-07
ENSG00000162734,12	8682	proliferation and apoptosis adaptor protein 15 [Source:HGNC Symbol;Acc:HGNC:8822]	PEA15	2589.26	0.238742	0.0418062	5.71069	1.12518e-08	2.29835e-07
ENSG00000184277,13	80213	TM2 domain containing 3 [Source:HGNC Symbol;Acc:HGNC:24128]	TM2D3	393.529	-0.331117	0.0580204	-5.70692	1.15039e-08	2.34742e-07
ENSG00000153012,12	55203	leucine rich repeat LGI family member 2 [Source:HGNC Symbol;Acc:HGNC:18710]	LGI2	426.275	-0.356554	0.0624871	-5.70603	1.1564e-08	2.35724e-07
ENSG00000128266,9	2781	G protein subunit alpha z [Source:HGNC Symbol;Acc:HGNC:4395]	GNAZ	198.139	-0.428008	0.0750396	-5.70376	1.17195e-08	2.38648e-07
ENSG00000186472,20	27445	piccolo presynaptic cytomatrix protein [Source:HGNC Symbol;Acc:HGNC:13406]	PCLO	180.512	0.74557	0.130897	5.69584	1.22768e-08	2.49738e-07
ENSG00000157654,18	445815	PALM2-AKAP2 fusion [Source:HGNC Symbol;Acc:HGNC:33529]	PALM2-AKAP2	626.78	-0.309344	0.0543548	-5.6912	1.2615e-08	2.56354e-07
ENSG00000187840,5	1978	eukaryotic translation initiation factor 4E binding protein 1 [Source:HGNC Symbol;Acc:HGNC:3288]	EIF4EBP1	244.386	0.586596	0.103091	5.69007	1.26991e-08	2.57796e-07
ENSG00000119705,9	81892	SRA stem-loop interacting RNA binding protein [Source:HGNC Symbol;Acc:HGNC:20495]	SLIRP	312.388	0.403688	0.0709677	5.68834	1.2828e-08	2.60146e-07
ENSG00000117139,17	10765	lysine demethylase 5B [Source:HGNC Symbol;Acc:HGNC:18039]	KDM5B	515.831	-0.41849	0.0735721	-5.68815	1.28421e-08	2.60165e-07
ENSG00000283103,3	NA	novel transcript, antisense to ERVK3-1	AC010642,2	425.886	0.318654	0.0560461	5.68557	1.30378e-08	2.63858e-07
ENSG00000000460,17	55732	chromosome 1 open reading frame 112 [Source:HGNC Symbol;Acc:HGNC:25565]	C1orf112	197.833	0.391161	0.0688476	5.68155	1.33482e-08	2.69586e-07
ENSG00000062485,19	1431	citrate synthase [Source:HGNC Symbol;Acc:HGNC:2422]	CS	773.465	0.293452	0.0516499	5.68156	1.33469e-08	2.69586e-07
ENSG00000173175,14	111	adenylate cyclase 5 [Source:HGNC Symbol;Acc:HGNC:236]	ADCY5	18.5042	-1.63065	0.287293	-5.6759	1.37958e-08	2.78342e-07
ENSG00000129003,18	54832	vacuolar protein sorting 13 homolog C [Source:HGNC Symbol;Acc:HGNC:23594]	VPS13C	943.107	-0.361845	0.0637621	-5.67492	1.38755e-08	2.79665e-07
ENSG00000196628,18	6925	transcription factor 4 [Source:HGNC Symbol;Acc:HGNC:11634]	TCF4	1915.35	-0.309643	0.0546	-5.67112	1.41867e-08	2.85644e-07
ENSG00000261488,1	112806053	TGF-beta induced lncRNA [Source:HGNC Symbol;Acc:HGNC:53943]	TBILA	5.71647	2.34151	0.413076	5.66847	1.44082e-08	2.89809e-07
ENSG00000006607,14	9855	FERM, ARH/RhoGEF and pleckstrin domain protein 2 [Source:HGNC Symbol;Acc:HGNC:16460]	FARP2	253.785	0.356492	0.0629217	5.66564	1.46479e-08	2.9433e-07
ENSG00000055130,17	8454	cullin 1 [Source:HGNC Symbol;Acc:HGNC:2551]	CUL1	880.865	0.287489	0.0507557	5.66416	1.47748e-08	2.96578e-07
ENSG00000113368,12	4001	lamin B1 [Source:HGNC Symbol;Acc:HGNC:6637]	LMNB1	1515.38	0.231495	0.0408987	5.6602	1.51192e-08	3.03184e-07
ENSG00000111364,16	57696	DEAD-box helicase 55 [Source:HGNC Symbol;Acc:HGNC:20085]	DDX55	270.454	0.38225	0.0675665	5.65739	1.53694e-08	3.07888e-07
ENSG00000114544,16	54946	solute carrier family 41 member 3 [Source:HGNC Symbol;Acc:HGNC:31046]	SLC41A3	299.254	-0.368303	0.0652118	-5.6478	1.62514e-08	3.24896e-07
ENSG00000174282,12	57659	zinc finger and BTB domain containing 4 [Source:HGNC Symbol;Acc:HGNC:23847]	ZBTB4	499.343	-0.288395	0.0510626	-5.64788	1.6244e-08	3.24896e-07
ENSG00000157379,14	115817	dehydrogenase/reductase 1 [Source:HGNC Symbol;Acc:HGNC:16445]	DHRS1	148.906	-0.518502	0.0918233	-5.64674	1.63519e-08	3.26575e-07
ENSG00000149636,15	79980	DSN1 component of MIS12 kinetochore complex [Source:HGNC Symbol;Acc:HGNC:16165]	DSN1	393.144	0.306115	0.0542896	5.63855	1.71489e-08	3.42145e-07
ENSG00000101098,12	140730	regulating synaptic membrane exocytosis 4 [Source:HGNC Symbol;Acc:HGNC:16183]	RIMS4	1233.01	0.312498	0.0554376	5.63693	1.73106e-08	3.44675e-07
ENSG00000120738,8	1958	early growth response 1 [Source:HGNC Symbol;Acc:HGNC:3238]	EGR1	469.862	-0.515765	0.0914973	-5.63695	1.73089e-08	3.44675e-07
ENSG00000035403,17	7414	vinculin [Source:HGNC Symbol;Acc:HGNC:12665]	VCL	721.845	0.283001	0.0502322	5.63386	1.76218e-08	3.50518e-07
ENSG00000205413,8	54809	sterile alpha motif domain containing 9 [Source:HGNC Symbol;Acc:HGNC:1348]	SAMD9	38.1394	-0.826541	0.146719	-5.63351	1.76573e-08	3.5087e-07
ENSG00000137124,8	219	aldehyde dehydrogenase 1 family member B1 [Source:HGNC Symbol;Acc:HGNC:407]	ALDH1B1	96.2752	-0.54939	0.0975328	-5.63287	1.77234e-08	3.51829e-07
ENSG00000197747,9	6281	S100 calcium binding protein A10 [Source:HGNC Symbol;Acc:HGNC:10487]	S100A10	1034.75	-0.382992	0.0679977	-5.63243	1.77684e-08	3.52369e-07
ENSG00000112992,18	23530	nicotinamide nucleotide transhydrogenase [Source:HGNC Symbol;Acc:HGNC:7863]	NNT	769.93	-0.232231	0.0412548	-5.62919	1.81057e-08	3.58697e-07
ENSG00000100345,21	4627	myosin heavy chain 9 [Source:HGNC Symbol;Acc:HGNC:7579]	MYH9	2539.5	-0.405806	0.0720952	-5.62876	1.81511e-08	3.59006e-07
ENSG00000137492,8	5612	THAP domain containing 12 [Source:HGNC Symbol;Acc:HGNC:9440]	THAP12	499.734	0.363328	0.0645492	5.6287	1.81577e-08	3.59006e-07
ENSG00000008018,9	5689	proteasome subunit beta 1 [Source:HGNC Symbol;Acc:HGNC:9537]	PSMB1	943.917	0.318513	0.0565943	5.628	1.82308e-08	3.60091e-07
ENSG00000125124,12	583	Bardet-Biedl syndrome 2 [Source:HGNC Symbol;Acc:HGNC:967]	BBS2	1012.47	-0.263717	0.0468764	-5.62579	1.84658e-08	3.64368e-07
ENSG00000130816,16	1786	DNA methyltransferase 1 [Source:HGNC Symbol;Acc:HGNC:2976]	DNMT1	2353.2	0.267597	0.0475746	5.62479	1.85739e-08	3.66133e-07
ENSG00000128285,4	2847	melanin concentrating hormone receptor 1 [Source:HGNC Symbol;Acc:HGNC:4479]	MCHR1	96.6523	-1.49724	0.266298	-5.62242	1.883e-08	3.70811e-07
ENSG00000183255,12	754	PTTG1 interacting protein [Source:HGNC Symbol;Acc:HGNC:13524]	PTTG1IP	1412.01	-0.185459	0.0330056	-5.61903	1.92036e-08	3.77791e-07
ENSG00000182132,13	30820	potassium voltage-gated channel interacting protein 1 [Source:HGNC Symbol;Acc:HGNC:15521]	KCNIP1	81.4638	-0.789917	0.140593	-5.61845	1.92673e-08	3.78667e-07
ENSG00000168781,22	9677	diphosphoinositol pentakisphosphate kinase 1 [Source:HGNC Symbol;Acc:HGNC:29023]	PPIP5K1	112.116	-0.527178	0.0938553	-5.61692	1.9439e-08	3.81663e-07
ENSG00000165124,18	79987	sushi, von Willebrand factor type A, EGF and pentraxin domain containing 1 [Source:HGNC Symbol;Acc:HGNC:15985]	SVEP1	23.6512	0.978729	0.17433	5.61423	1.9744e-08	3.87265e-07
ENSG00000145555,15	4651	myosin X [Source:HGNC Symbol;Acc:HGNC:7593]	MYO10	1867.73	-0.186715	0.0332831	-5.6099	2.02444e-08	3.96686e-07
ENSG00000164292,13	22836	Rho related BTB domain containing 3 [Source:HGNC Symbol;Acc:HGNC:18757]	RHOBTB3	902.513	-0.343387	0.0612383	-5.60738	2.05411e-08	4.021e-07
ENSG00000108829,10	55379	leucine rich repeat containing 59 [Source:HGNC Symbol;Acc:HGNC:28817]	LRRC59	946.509	0.240635	0.042929	5.60542	2.0775e-08	4.06276e-07
ENSG00000133706,18	51520	leucyl-tRNA synthetase [Source:HGNC Symbol;Acc:HGNC:6512]	LARS	1619.57	0.308049	0.0549987	5.60102	2.13093e-08	4.16312e-07
ENSG00000075790,10	55973	B cell receptor associated protein 29 [Source:HGNC Symbol;Acc:HGNC:24131]	BCAP29	826.876	0.402174	0.0718389	5.59828	2.16485e-08	4.2252e-07
ENSG00000155760,2	8324	frizzled class receptor 7 [Source:HGNC Symbol;Acc:HGNC:4045]	FZD7	345.558	-0.382961	0.0684769	-5.59256	2.23748e-08	4.36264e-07
ENSG00000119718,11	8892	eukaryotic translation initiation factor 2B subunit beta [Source:HGNC Symbol;Acc:HGNC:3258]	EIF2B2	261.004	0.386242	0.0690757	5.59157	2.25019e-08	4.3831e-07
ENSG00000158859,10	9507	ADAM metallopeptidase with thrombospondin type 1 motif 4 [Source:HGNC Symbol;Acc:HGNC:220]	ADAMTS4	63.3671	-0.729646	0.130501	-5.5911	2.25637e-08	4.39081e-07
ENSG00000090776,6	1947	ephrin B1 [Source:HGNC Symbol;Acc:HGNC:3226]	EFNB1	447.296	-0.494467	0.0884522	-5.59022	2.26787e-08	4.40882e-07
ENSG00000131002,12	NA	taxilin gamma pseudogene, Y-linked [Source:HGNC Symbol;Acc:HGNC:18473]	TXLNGY	407.858	0.475946	0.0851491	5.58956	2.27642e-08	4.4211e-07
ENSG00000079387,14	29843	SUMO specific peptidase 1 [Source:HGNC Symbol;Acc:HGNC:17927]	SENP1	332.168	0.34708	0.0622356	5.57687	2.44883e-08	4.75126e-07
ENSG00000167614,14	57348	tweety family member 1 [Source:HGNC Symbol;Acc:HGNC:13476]	TTYH1	871.674	-0.598085	0.107335	-5.57214	2.51632e-08	4.8774e-07
ENSG00000105810,9	1021	cyclin dependent kinase 6 [Source:HGNC Symbol;Acc:HGNC:1777]	CDK6	7994.84	0.278361	0.049971	5.57046	2.5407e-08	4.91984e-07
ENSG00000107815,10	56652	twinkle mtDNA helicase [Source:HGNC Symbol;Acc:HGNC:1160]	TWNK	137.425	0.43851	0.0788089	5.56422	2.63322e-08	5.094e-07
ENSG00000179051,14	55920	regulator of chromosome condensation 2 [Source:HGNC Symbol;Acc:HGNC:30297]	RCC2	1679.12	0.219978	0.0395377	5.56376	2.6402e-08	5.1025e-07
ENSG00000185567,7	113146	AHNAK nucleoprotein 2 [Source:HGNC Symbol;Acc:HGNC:20125]	AHNAK2	265.439	-0.614291	0.110496	-5.55937	2.70743e-08	5.22731e-07
ENSG00000100473,18	1690	cochlin [Source:HGNC Symbol;Acc:HGNC:2180]	COCH	48.4317	-0.828269	0.149045	-5.55717	2.7418e-08	5.28653e-07
ENSG00000124535,16	56897	WRN helicase interacting protein 1 [Source:HGNC Symbol;Acc:HGNC:20876]	WRNIP1	286.881	0.363743	0.065458	5.5569	2.74615e-08	5.28653e-07
ENSG00000267322,2	NA	small nucleolar RNA host gene 22 [Source:HGNC Symbol;Acc:HGNC:50285]	SNHG22	36.057	-0.871068	0.156753	-5.55695	2.74536e-08	5.28653e-07
ENSG00000225937,3	NA	prostate cancer associated 3 [Source:HGNC Symbol;Acc:HGNC:8637]	PCA3	25.5147	-1.04526	0.188279	-5.55169	2.82916e-08	5.44103e-07
ENSG00000112685,14	55770	exocyst complex component 2 [Source:HGNC Symbol;Acc:HGNC:24968]	EXOC2	376.875	0.340594	0.0613542	5.55127	2.83605e-08	5.44897e-07
ENSG00000123104,12	3709	inositol 1,4,5-trisphosphate receptor type 2 [Source:HGNC Symbol;Acc:HGNC:6181]	ITPR2	424.609	0.447364	0.0806556	5.54659	2.91287e-08	5.59112e-07
ENSG00000269825,1	NA	novel transcript, sense intronic to ZNF83	AC022150,4	82.189	0.629751	0.113569	5.54507	2.93829e-08	5.63444e-07
ENSG00000100439,10	63874	abhydrolase domain containing 4 [Source:HGNC Symbol;Acc:HGNC:20154]	ABHD4	503.362	-0.310053	0.05594	-5.54261	2.97996e-08	5.7088e-07
ENSG00000112029,10	26271	F-box protein 5 [Source:HGNC Symbol;Acc:HGNC:13584]	FBXO5	413.839	0.385314	0.0695594	5.53936	3.03581e-08	5.81015e-07
ENSG00000160685,13	51043	zinc finger and BTB domain containing 7B [Source:HGNC Symbol;Acc:HGNC:18668]	ZBTB7B	68.0753	-0.981754	0.177323	-5.53653	3.08521e-08	5.89897e-07
ENSG00000082641,16	4779	nuclear factor, erythroid 2 like 1 [Source:HGNC Symbol;Acc:HGNC:7781]	NFE2L1	1883.6	-0.240178	0.0433861	-5.53583	3.09757e-08	5.91686e-07
ENSG00000108828,16	10493	vesicle amine transport 1 [Source:HGNC Symbol;Acc:HGNC:16919]	VAT1	200.67	-0.43608	0.07878	-5.53541	3.10494e-08	5.92522e-07
ENSG00000166377,20	374868	ATPase phospholipid transporting 9B (putative) [Source:HGNC Symbol;Acc:HGNC:13541]	ATP9B	182.262	-0.400915	0.072474	-5.53185	3.16874e-08	6.04111e-07
ENSG00000103184,12	9717	SEC14 like lipid binding 5 [Source:HGNC Symbol;Acc:HGNC:29032]	SEC14L5	24.7995	-1.85316	0.335113	-5.52996	3.20298e-08	6.1005e-07
ENSG00000198554,12	11169	WD repeat and HMG-box DNA binding protein 1 [Source:HGNC Symbol;Acc:HGNC:23170]	WDHD1	606.141	0.349118	0.0631532	5.52812	3.23678e-08	6.15894e-07
ENSG00000170689,10	3219	homeobox B9 [Source:HGNC Symbol;Acc:HGNC:5120]	HOXB9	116.071	0.880778	0.159369	5.52666	3.26378e-08	6.20432e-07
ENSG00000196591,12	3066	histone deacetylase 2 [Source:HGNC Symbol;Acc:HGNC:4853]	HDAC2	1013.48	0.333292	0.0603171	5.52566	3.28244e-08	6.2338e-07
ENSG00000259049,1	NA	novel transcript, antisense to GNPNAT1	AL139317,3	194.46	0.460265	0.0833723	5.52061	3.37832e-08	6.40971e-07
ENSG00000178033,6	254228	calcium homeostasis modulator family member 5 [Source:HGNC Symbol;Acc:HGNC:21568]	CALHM5	12.5698	1.27094	0.230407	5.51607	3.46659e-08	6.57086e-07
ENSG00000157823,17	10239	adaptor related protein complex 3 subunit sigma 2 [Source:HGNC Symbol;Acc:HGNC:571]	AP3S2	136.736	-0.482948	0.0875728	-5.51482	3.49138e-08	6.61151e-07
ENSG00000175274,18	9537	tumor protein p53 inducible protein 11 [Source:HGNC Symbol;Acc:HGNC:16842]	TP53I11	306.85	0.412426	0.0748145	5.51265	3.53464e-08	6.687e-07
ENSG00000079156,17	114880	oxysterol binding protein like 6 [Source:HGNC Symbol;Acc:HGNC:16388]	OSBPL6	306.343	0.376397	0.0682909	5.51167	3.55435e-08	6.71786e-07
ENSG00000145860,11	153830	ring finger protein 145 [Source:HGNC Symbol;Acc:HGNC:20853]	RNF145	852.99	-0.334793	0.0607505	-5.51094	3.56921e-08	6.73494e-07
ENSG00000213930,11	2592	galactose-1-phosphate uridylyltransferase [Source:HGNC Symbol;Acc:HGNC:4135]	GALT	13.7313	-1.82676	0.331482	-5.51089	3.57022e-08	6.73494e-07
ENSG00000075142,13	6717	sorcin [Source:HGNC Symbol;Acc:HGNC:11292]	SRI	2032.36	0.238069	0.0432132	5.50918	3.60512e-08	6.78781e-07
ENSG00000251369,8	162972	zinc finger protein 550 [Source:HGNC Symbol;Acc:HGNC:28643]	ZNF550	188.806	0.430578	0.0781565	5.50918	3.60505e-08	6.78781e-07
ENSG00000174748,21	6138	ribosomal protein L15 [Source:HGNC Symbol;Acc:HGNC:10306]	RPL15	4045.27	-0.233436	0.0423958	-5.50611	3.66851e-08	6.90058e-07
ENSG00000074964,17	55160	Rho guanine nucleotide exchange factor 10 like [Source:HGNC Symbol;Acc:HGNC:25540]	ARHGEF10L	171.785	-0.742031	0.13485	-5.50263	3.74168e-08	7.0315e-07
ENSG00000169692,13	10555	1-acylglycerol-3-phosphate O-acyltransferase 2 [Source:HGNC Symbol;Acc:HGNC:325]	AGPAT2	33.9567	-1.09891	0.199725	-5.50212	3.75248e-08	7.04509e-07
ENSG00000264785,1	NA	novel transcript, antisense to ALDH3A1	AC005722,4	17.9353	-1.3369	0.243034	-5.50085	3.77959e-08	7.08924e-07
ENSG00000171680,22	57449	pleckstrin homology and RhoGEF domain containing G5 [Source:HGNC Symbol;Acc:HGNC:29105]	PLEKHG5	146.393	-0.873604	0.158899	-5.49787	3.84408e-08	7.20337e-07
ENSG00000128872,10	29767	tropomodulin 2 [Source:HGNC Symbol;Acc:HGNC:11872]	TMOD2	561.343	-0.388827	0.0707967	-5.49216	3.97041e-08	7.43303e-07
ENSG00000080709,15	3781	potassium calcium-activated channel subfamily N member 2 [Source:HGNC Symbol;Acc:HGNC:6291]	KCNN2	36.853	0.831877	0.151481	5.49161	3.98277e-08	7.44775e-07
ENSG00000158445,10	3745	potassium voltage-gated channel subfamily B member 1 [Source:HGNC Symbol;Acc:HGNC:6231]	KCNB1	65.3747	-1.11997	0.203946	-5.49148	3.98582e-08	7.44775e-07
ENSG00000205060,11	84912	solute carrier family 35 member B4 [Source:HGNC Symbol;Acc:HGNC:20584]	SLC35B4	753.761	0.270328	0.0492476	5.48915	4.03866e-08	7.53934e-07
ENSG00000264577,1	NA	novel transcript, antisense to RPL23A	AC010761,1	457.307	-0.328463	0.0598467	-5.48839	4.05604e-08	7.56463e-07
ENSG00000279437,1	NA	TEC	Z82170,1	61.6743	-0.731807	0.133408	-5.48546	4.12385e-08	7.68383e-07
ENSG00000151320,11	9472	A-kinase anchoring protein 6 [Source:HGNC Symbol;Acc:HGNC:376]	AKAP6	28.4321	-1.13112	0.206394	-5.48041	4.24343e-08	7.89918e-07
ENSG00000146457,16	9589	WT1 associated protein [Source:HGNC Symbol;Acc:HGNC:16846]	WTAP	475.784	0.326179	0.0595266	5.47955	4.26408e-08	7.93014e-07
ENSG00000093009,10	8318	cell division cycle 45 [Source:HGNC Symbol;Acc:HGNC:1739]	CDC45	267.92	0.344507	0.0628772	5.47905	4.27616e-08	7.94513e-07
ENSG00000130024,15	55274	PHD finger protein 10 [Source:HGNC Symbol;Acc:HGNC:18250]	PHF10	767.018	0.373889	0.0682723	5.47643	4.33989e-08	8.05595e-07
ENSG00000170537,13	79905	transmembrane channel like 7 [Source:HGNC Symbol;Acc:HGNC:23000]	TMC7	334.671	-0.337142	0.0615677	-5.47596	4.35152e-08	8.06994e-07
ENSG00000179151,13	80153	enhancer of mRNA decapping 3 [Source:HGNC Symbol;Acc:HGNC:26114]	EDC3	371.415	-0.316578	0.0578438	-5.47298	4.42539e-08	8.19923e-07
ENSG00000180263,14	55785	FYVE, RhoGEF and PH domain containing 6 [Source:HGNC Symbol;Acc:HGNC:21740]	FGD6	91.9537	0.527895	0.0965112	5.46978	4.50595e-08	8.34065e-07
ENSG00000072832,15	1400	collapsin response mediator protein 1 [Source:HGNC Symbol;Acc:HGNC:2365]	CRMP1	957.655	-0.238277	0.043568	-5.46908	4.52386e-08	8.36596e-07
ENSG00000067334,14	30836	deoxynucleotidyltransferase terminal interacting protein 2 [Source:HGNC Symbol;Acc:HGNC:24013]	DNTTIP2	499.625	0.373884	0.0683755	5.4681	4.54897e-08	8.40451e-07
ENSG00000140564,12	5045	furin, paired basic amino acid cleaving enzyme [Source:HGNC Symbol;Acc:HGNC:8568]	FURIN	104.404	-0.772936	0.141431	-5.4651	4.62652e-08	8.53981e-07
ENSG00000108947,5	1949	ephrin B3 [Source:HGNC Symbol;Acc:HGNC:3228]	EFNB3	83.8754	-0.56833	0.104075	-5.46075	4.74115e-08	8.74321e-07
ENSG00000166900,17	6809	syntaxin 3 [Source:HGNC Symbol;Acc:HGNC:11438]	STX3	82.8985	-0.612455	0.112186	-5.45926	4.78116e-08	8.80876e-07
ENSG00000008256,16	9265	cytohesin 3 [Source:HGNC Symbol;Acc:HGNC:9504]	CYTH3	467.689	0.296823	0.0543909	5.45722	4.83646e-08	8.90233e-07
ENSG00000008513,16	6482	ST3 beta-galactoside alpha-2,3-sialyltransferase 1 [Source:HGNC Symbol;Acc:HGNC:10862]	ST3GAL1	714.11	-0.293016	0.0536951	-5.45702	4.84179e-08	8.90384e-07
ENSG00000134186,12	55119	pre-mRNA processing factor 38B [Source:HGNC Symbol;Acc:HGNC:25512]	PRPF38B	609.633	0.348696	0.0639542	5.45228	4.97286e-08	9.13636e-07
ENSG00000165792,17	64745	methyltransferase like 17 [Source:HGNC Symbol;Acc:HGNC:19280]	METTL17	406.717	0.299832	0.0550154	5.44997	5.03783e-08	9.24712e-07
ENSG00000139926,15	122786	FERM domain containing 6 [Source:HGNC Symbol;Acc:HGNC:19839]	FRMD6	685.199	0.322491	0.0592029	5.44722	5.1164e-08	9.38261e-07
ENSG00000182512,5	51218	glutaredoxin 5 [Source:HGNC Symbol;Acc:HGNC:20134]	GLRX5	266.48	0.366361	0.0672746	5.44575	5.1587e-08	9.45139e-07
ENSG00000100979,15	5360	phospholipid transfer protein [Source:HGNC Symbol;Acc:HGNC:9093]	PLTP	375.425	-0.456143	0.0837838	-5.44429	5.20134e-08	9.52067e-07
ENSG00000167654,18	85300	ATCAY kinesin light chain interacting caytaxin [Source:HGNC Symbol;Acc:HGNC:779]	ATCAY	32.6365	-0.984249	0.180823	-5.44316	5.23426e-08	9.5632e-07
ENSG00000173077,16	NA	deleted in esophageal cancer 1 [Source:HGNC Symbol;Acc:HGNC:23658]	DEC1	41.6977	-0.95301	0.175083	-5.44318	5.23378e-08	9.5632e-07
ENSG00000101079,21	57446	NDRG family member 3 [Source:HGNC Symbol;Acc:HGNC:14462]	NDRG3	388.367	-0.366325	0.0674243	-5.43313	5.53727e-08	1.01074e-06
ENSG00000174776,11	151790	WD repeat domain 49 [Source:HGNC Symbol;Acc:HGNC:26587]	WDR49	23.5086	-1.43376	0.264166	-5.42751	5.71441e-08	1.04211e-06
ENSG00000105223,20	23646	phospholipase D family member 3 [Source:HGNC Symbol;Acc:HGNC:17158]	PLD3	396.743	-0.551762	0.101772	-5.42157	5.90778e-08	1.07539e-06
ENSG00000178104,19	9659	phosphodiesterase 4D interacting protein [Source:HGNC Symbol;Acc:HGNC:15580]	PDE4DIP	182.464	-0.43148	0.0795836	-5.42172	5.90286e-08	1.07539e-06
ENSG00000175445,17	4023	lipoprotein lipase [Source:HGNC Symbol;Acc:HGNC:6677]	LPL	494.027	-0.312564	0.0576793	-5.41899	5.9936e-08	1.09001e-06
ENSG00000140104,14	122616	clathrin binding box of aftiphilin containing 1 [Source:HGNC Symbol;Acc:HGNC:20126]	CLBA1	174.478	0.462361	0.085341	5.4178	6.03352e-08	1.09626e-06
ENSG00000100266,19	11252	protein kinase C and casein kinase substrate in neurons 2 [Source:HGNC Symbol;Acc:HGNC:8571]	PACSIN2	486.184	-0.313639	0.0579059	-5.41636	6.08234e-08	1.10411e-06
ENSG00000141580,16	56270	WD repeat domain 45B [Source:HGNC Symbol;Acc:HGNC:25072]	WDR45B	1004.71	-0.215067	0.0397211	-5.41442	6.14877e-08	1.11514e-06
ENSG00000103550,14	400506	lysine rich nucleolar protein 1 [Source:HGNC Symbol;Acc:HGNC:34404]	KNOP1	372.576	0.282604	0.0522143	5.41239	6.21882e-08	1.12578e-06
ENSG00000164106,8	11341	stimulator of chondrogenesis 1 [Source:HGNC Symbol;Acc:HGNC:17036]	SCRG1	73.7944	0.623378	0.115175	5.41244	6.21715e-08	1.12578e-06
ENSG00000175183,10	1466	cysteine and glycine rich protein 2 [Source:HGNC Symbol;Acc:HGNC:2470]	CSRP2	1362.46	0.293237	0.0541898	5.4113	6.25703e-08	1.13166e-06
ENSG00000143878,10	388	ras homolog family member B [Source:HGNC Symbol;Acc:HGNC:668]	RHOB	148.753	-0.497998	0.092041	-5.41062	6.28084e-08	1.13492e-06
ENSG00000225339,4	NA	novel transcript, antisense to C6orf1	AL354740,1	1421.41	0.276329	0.0510787	5.40987	6.30717e-08	1.13864e-06
ENSG00000187122,17	6585	slit guidance ligand 1 [Source:HGNC Symbol;Acc:HGNC:11085]	SLIT1	2359.18	-0.403275	0.0745943	-5.40624	6.4361e-08	1.16085e-06
ENSG00000100941,9	5411	pinin, desmosome associated protein [Source:HGNC Symbol;Acc:HGNC:9162]	PNN	1758.27	0.279189	0.0516464	5.40578	6.45273e-08	1.16279e-06
ENSG00000181481,14	84282	ring finger protein 135 [Source:HGNC Symbol;Acc:HGNC:21158]	RNF135	19.3329	1.03782	0.191992	5.40555	6.46108e-08	1.16323e-06
ENSG00000133392,18	4629	myosin heavy chain 11 [Source:HGNC Symbol;Acc:HGNC:7569]	MYH11	175.904	-0.441309	0.0816502	-5.40487	6.48559e-08	1.16658e-06
ENSG00000158470,5	9334	beta-1,4-galactosyltransferase 5 [Source:HGNC Symbol;Acc:HGNC:928]	B4GALT5	1325.05	-0.227233	0.0420615	-5.40241	6.57498e-08	1.18158e-06
ENSG00000272068,1	NA	novel transcript	AL365181,2	64.36	-0.897585	0.166198	-5.4007	6.63825e-08	1.19186e-06
ENSG00000138835,22	5998	regulator of G protein signaling 3 [Source:HGNC Symbol;Acc:HGNC:9999]	RGS3	156.433	-0.485086	0.0898774	-5.39719	6.76909e-08	1.21315e-06
ENSG00000170891,11	54360	cytokine like 1 [Source:HGNC Symbol;Acc:HGNC:24435]	CYTL1	77.5066	0.653533	0.121084	5.39734	6.76344e-08	1.21315e-06
ENSG00000184307,15	254887	zinc finger DHHC-type containing 23 [Source:HGNC Symbol;Acc:HGNC:28654]	ZDHHC23	417.49	-0.358921	0.0665458	-5.39359	6.90632e-08	1.23662e-06
ENSG00000111335,12	4939	2'-5'-oligoadenylate synthetase 2 [Source:HGNC Symbol;Acc:HGNC:8087]	OAS2	16.9908	-1.61449	0.299432	-5.39183	6.97455e-08	1.24771e-06
ENSG00000140044,13	122953	Jun dimerization protein 2 [Source:HGNC Symbol;Acc:HGNC:17546]	JDP2	114.919	0.612932	0.11371	5.39033	7.03294e-08	1.25701e-06
ENSG00000174842,17	11146	glomulin, FKBP associated protein [Source:HGNC Symbol;Acc:HGNC:14373]	GLMN	134.002	0.490547	0.0910308	5.3888	7.09288e-08	1.26658e-06
ENSG00000145242,13	2044	EPH receptor A5 [Source:HGNC Symbol;Acc:HGNC:3389]	EPHA5	22.701	-1.82645	0.33906	-5.3868	7.1725e-08	1.27964e-06
ENSG00000006530,18	55750	acylglycerol kinase [Source:HGNC Symbol;Acc:HGNC:21869]	AGK	450.998	0.268712	0.0499131	5.38359	7.3014e-08	1.30146e-06
ENSG00000255301,1	NA	novel transcript	AP002893,1	121.688	-0.788195	0.146413	-5.38338	7.30995e-08	1.3018e-06
ENSG00000121905,10	3208	hippocalcin [Source:HGNC Symbol;Acc:HGNC:5144]	HPCA	13.8722	-1.64054	0.304823	-5.38195	7.36832e-08	1.31102e-06
ENSG00000242259,8	128977	chromosome 22 open reading frame 39 [Source:HGNC Symbol;Acc:HGNC:27012]	C22orf39	228.074	-0.366449	0.0681119	-5.3801	7.44426e-08	1.32333e-06
ENSG00000096063,16	6732	SRSF protein kinase 1 [Source:HGNC Symbol;Acc:HGNC:11305]	SRPK1	372.518	0.308373	0.0573214	5.37972	7.46031e-08	1.32499e-06
ENSG00000198185,11	55713	zinc finger protein 334 [Source:HGNC Symbol;Acc:HGNC:15806]	ZNF334	201.491	0.474288	0.0882065	5.37702	7.57283e-08	1.34377e-06
ENSG00000012048,22	672	BRCA1 DNA repair associated [Source:HGNC Symbol;Acc:HGNC:1100]	BRCA1	440.914	0.287563	0.0534926	5.37575	7.62627e-08	1.35204e-06
ENSG00000257056,3	NA	long intergenic non-protein coding RNA 2282 [Source:HGNC Symbol;Acc:HGNC:53199]	LINC02282	94.8688	0.600038	0.111627	5.37539	7.64172e-08	1.35356e-06
ENSG00000196505,11	54834	ganglioside induced differentiation associated protein 2 [Source:HGNC Symbol;Acc:HGNC:18010]	GDAP2	148.467	0.514222	0.0956785	5.37448	7.68024e-08	1.35916e-06
ENSG00000183856,11	128239	IQ motif containing GTPase activating protein 3 [Source:HGNC Symbol;Acc:HGNC:20669]	IQGAP3	419.519	0.36229	0.067481	5.36877	7.92755e-08	1.40167e-06
ENSG00000055163,20	26999	cytoplasmic FMR1 interacting protein 2 [Source:HGNC Symbol;Acc:HGNC:13760]	CYFIP2	116.341	-0.561971	0.104689	-5.36803	7.96025e-08	1.40619e-06
ENSG00000115468,12	80303	EF-hand domain family member D1 [Source:HGNC Symbol;Acc:HGNC:29556]	EFHD1	31.642	0.790927	0.147377	5.3667	8.01902e-08	1.41531e-06
ENSG00000169241,19	55974	solute carrier family 50 member 1 [Source:HGNC Symbol;Acc:HGNC:30657]	SLC50A1	81.5034	0.59788	0.111417	5.36615	8.04339e-08	1.41834e-06
ENSG00000164938,14	94241	tumor protein p53 inducible nuclear protein 1 [Source:HGNC Symbol;Acc:HGNC:18022]	TP53INP1	52.3282	-0.684795	0.127706	-5.36226	8.21872e-08	1.44796e-06
ENSG00000168264,10	359948	interferon regulatory factor 2 binding protein 2 [Source:HGNC Symbol;Acc:HGNC:21729]	IRF2BP2	367.682	-0.310368	0.0578849	-5.36181	8.239e-08	1.45024e-06
ENSG00000050393,11	63933	mitochondrial calcium uniporter regulator 1 [Source:HGNC Symbol;Acc:HGNC:21097]	MCUR1	376.093	0.317437	0.0592184	5.36044	8.30177e-08	1.45999e-06
ENSG00000170485,17	4862	neuronal PAS domain protein 2 [Source:HGNC Symbol;Acc:HGNC:7895]	NPAS2	774.713	-0.304289	0.0567714	-5.35989	8.32729e-08	1.46317e-06
ENSG00000075213,11	10371	semaphorin 3A [Source:HGNC Symbol;Acc:HGNC:10723]	SEMA3A	477.731	0.3899	0.0727804	5.35721	8.45178e-08	1.48372e-06
ENSG00000088367,23	2036	erythrocyte membrane protein band 4,1 like 1 [Source:HGNC Symbol;Acc:HGNC:3378]	EPB41L1	178.265	-0.389386	0.0726923	-5.35663	8.47889e-08	1.48559e-06
ENSG00000124789,11	9972	nucleoporin 153 [Source:HGNC Symbol;Acc:HGNC:8062]	NUP153	823.069	0.255004	0.0476064	5.3565	8.48502e-08	1.48559e-06
ENSG00000148358,19	57720	G protein-coupled receptor 107 [Source:HGNC Symbol;Acc:HGNC:17830]	GPR107	767.385	-0.269435	0.0502986	-5.35671	8.47522e-08	1.48559e-06
ENSG00000106789,13	7464	coronin 2A [Source:HGNC Symbol;Acc:HGNC:2255]	CORO2A	103.284	-0.556327	0.103878	-5.35558	8.52802e-08	1.4918e-06
ENSG00000129422,14	57509	microtubule associated scaffold protein 1 [Source:HGNC Symbol;Acc:HGNC:29789]	MTUS1	61.9859	-0.672896	0.12576	-5.35065	8.76396e-08	1.53171e-06
ENSG00000126822,17	26030	pleckstrin homology and RhoGEF domain containing G3 [Source:HGNC Symbol;Acc:HGNC:20364]	PLEKHG3	343.12	0.485145	0.0907345	5.34687	8.94881e-08	1.56264e-06
ENSG00000137210,14	81853	transmembrane protein 14B [Source:HGNC Symbol;Acc:HGNC:21384]	TMEM14B	181.162	0.422185	0.078962	5.34669	8.95775e-08	1.56282e-06
ENSG00000189091,13	23450	splicing factor 3b subunit 3 [Source:HGNC Symbol;Acc:HGNC:10770]	SF3B3	1861.24	0.194006	0.0363221	5.34127	9.22961e-08	1.60882e-06
ENSG00000182175,14	56963	repulsive guidance molecule BMP co-receptor a [Source:HGNC Symbol;Acc:HGNC:30308]	RGMA	214.736	-0.696942	0.130536	-5.33906	9.34287e-08	1.62713e-06
ENSG00000134013,16	4017	lysyl oxidase like 2 [Source:HGNC Symbol;Acc:HGNC:6666]	LOXL2	174.107	-0.472999	0.0886329	-5.33661	9.47011e-08	1.64783e-06
ENSG00000070540,13	55062	WD repeat domain, phosphoinositide interacting 1 [Source:HGNC Symbol;Acc:HGNC:25471]	WIPI1	185.858	-0.487211	0.0913616	-5.33278	9.6723e-08	1.68005e-06
ENSG00000145191,15	8893	eukaryotic translation initiation factor 2B subunit epsilon [Source:HGNC Symbol;Acc:HGNC:3261]	EIF2B5	489.267	0.252231	0.047298	5.33281	9.67045e-08	1.68005e-06
ENSG00000168386,18	11259	filamin A interacting protein 1 like [Source:HGNC Symbol;Acc:HGNC:24589]	FILIP1L	332.745	-0.508462	0.0953599	-5.33203	9.71193e-08	1.68545e-06
ENSG00000260139,6	NA	chondroitin sulfate proteoglycan 4 pseudogene 13 [Source:HGNC Symbol;Acc:HGNC:49195]	CSPG4P13	24.9664	-1.29778	0.243443	-5.33095	9.77003e-08	1.69404e-06
ENSG00000278768,2	NA	BACE1 antisense RNA [Source:HGNC Symbol;Acc:HGNC:37125]	BACE1-AS	392.544	0.298199	0.0559704	5.32779	9.94131e-08	1.72223e-06
ENSG00000173145,11	64318	NOC3 like DNA replication regulator [Source:HGNC Symbol;Acc:HGNC:24034]	NOC3L	273.793	0.428938	0.0805171	5.32729	9.96871e-08	1.72546e-06
ENSG00000184678,10	8349	histone cluster 2 H2B family member e [Source:HGNC Symbol;Acc:HGNC:4760]	HIST2H2BE	52.8819	-0.759901	0.142657	-5.32676	9.99819e-08	1.72905e-06
ENSG00000243232,6	56134	protocadherin alpha subfamily C, 2 [Source:HGNC Symbol;Acc:HGNC:8677]	PCDHAC2	91.6663	-0.610219	0.114576	-5.32591	1.00451e-07	1.73564e-06
ENSG00000187109,14	4673	nucleosome assembly protein 1 like 1 [Source:HGNC Symbol;Acc:HGNC:7637]	NAP1L1	3314.48	0.369118	0.0693085	5.32572	1.00555e-07	1.73592e-06
ENSG00000103811,16	1512	cathepsin H [Source:HGNC Symbol;Acc:HGNC:2535]	CTSH	16.536	1.34353	0.25234	5.32426	1.01363e-07	1.74833e-06
ENSG00000112159,12	23195	midasin AAA ATPase 1 [Source:HGNC Symbol;Acc:HGNC:18302]	MDN1	592.096	0.286283	0.0537735	5.32386	1.01588e-07	1.75069e-06
ENSG00000051128,19	9454	homer scaffold protein 3 [Source:HGNC Symbol;Acc:HGNC:17514]	HOMER3	150.906	-0.531644	0.0998827	-5.32268	1.02247e-07	1.75897e-06
ENSG00000204619,8	6992	protein phosphatase 1 regulatory inhibitor subunit 11 [Source:HGNC Symbol;Acc:HGNC:9285]	PPP1R11	351.308	0.322467	0.0605825	5.32278	1.02196e-07	1.75897e-06
ENSG00000075340,23	119	adducin 2 [Source:HGNC Symbol;Acc:HGNC:244]	ADD2	498.193	-0.246559	0.0463279	-5.32204	1.02609e-07	1.76366e-06
ENSG00000076043,10	25996	RNA exonuclease 2 [Source:HGNC Symbol;Acc:HGNC:17851]	REXO2	153.076	0.425916	0.0800515	5.32053	1.03468e-07	1.77688e-06
ENSG00000082781,12	3693	integrin subunit beta 5 [Source:HGNC Symbol;Acc:HGNC:6160]	ITGB5	163.211	0.478034	0.089857	5.31994	1.03804e-07	1.78075e-06
ENSG00000103769,10	8766	RAB11A, member RAS oncogene family [Source:HGNC Symbol;Acc:HGNC:9760]	RAB11A	883.594	-0.335654	0.063095	-5.31981	1.03874e-07	1.78075e-06
ENSG00000085063,16	966	CD59 molecule (CD59 blood group) [Source:HGNC Symbol;Acc:HGNC:1689]	CD59	795.19	-0.330736	0.0621893	-5.31822	1.0479e-07	1.79489e-06
ENSG00000110675,13	55531	ELMO domain containing 1 [Source:HGNC Symbol;Acc:HGNC:25334]	ELMOD1	25.0594	-1.34096	0.252174	-5.31758	1.05155e-07	1.79959e-06
ENSG00000092853,14	63967	claspin [Source:HGNC Symbol;Acc:HGNC:19715]	CLSPN	236.849	0.321729	0.0605676	5.3119	1.0849e-07	1.85505e-06
ENSG00000250067,12	374887	YjeF N-terminal domain containing 3 [Source:HGNC Symbol;Acc:HGNC:24785]	YJEFN3	107.316	0.677069	0.12747	5.31161	1.08659e-07	1.85634e-06
ENSG00000095139,14	372	archain 1 [Source:HGNC Symbol;Acc:HGNC:649]	ARCN1	1148.93	0.289077	0.0544304	5.31094	1.09058e-07	1.86154e-06
ENSG00000163171,7	10602	CDC42 effector protein 3 [Source:HGNC Symbol;Acc:HGNC:16943]	CDC42EP3	395.694	0.359602	0.0677478	5.30795	1.10866e-07	1.89075e-06
ENSG00000169439,12	6383	syndecan 2 [Source:HGNC Symbol;Acc:HGNC:10659]	SDC2	374.963	-0.359598	0.0677659	-5.30647	1.11767e-07	1.90407e-06
ENSG00000267128,2	NA	RNF157 antisense RNA 1 [Source:HGNC Symbol;Acc:HGNC:44127]	RNF157-AS1	521.42	-0.287766	0.0542305	-5.30635	1.1184e-07	1.90407e-06
ENSG00000158301,18	114928	G protein-coupled receptor associated sorting protein 2 [Source:HGNC Symbol;Acc:HGNC:25169]	GPRASP2	202.338	0.379236	0.0715045	5.30367	1.135e-07	1.93068e-06
ENSG00000134363,12	10468	follistatin [Source:HGNC Symbol;Acc:HGNC:3971]	FST	74.1762	-0.620708	0.117041	-5.30335	1.13696e-07	1.93234e-06
ENSG00000230461,9	NA	PROX1 antisense RNA 1 [Source:HGNC Symbol;Acc:HGNC:43656]	PROX1-AS1	31.2704	-1.08272	0.204224	-5.30164	1.14769e-07	1.9489e-06
ENSG00000005893,15	3920	lysosomal associated membrane protein 2 [Source:HGNC Symbol;Acc:HGNC:6501]	LAMP2	974.91	-0.279157	0.0526581	-5.30131	1.14972e-07	1.95067e-06
ENSG00000106665,15	7461	CAP-Gly domain containing linker protein 2 [Source:HGNC Symbol;Acc:HGNC:2586]	CLIP2	1015.25	-0.550119	0.103799	-5.29986	1.15891e-07	1.96457e-06
ENSG00000139209,16	55089	solute carrier family 38 member 4 [Source:HGNC Symbol;Acc:HGNC:14679]	SLC38A4	7.07374	1.80808	0.341561	5.29359	1.19937e-07	2.03141e-06
ENSG00000103855,18	80381	CD276 molecule [Source:HGNC Symbol;Acc:HGNC:19137]	CD276	1226.31	-0.400796	0.0757387	-5.29182	1.21105e-07	2.04943e-06
ENSG00000132434,9	55915	LanC like 2 [Source:HGNC Symbol;Acc:HGNC:6509]	LANCL2	275.887	0.353767	0.0668626	5.29096	1.21675e-07	2.05712e-06
ENSG00000173905,9	27333	golgi integral membrane protein 4 [Source:HGNC Symbol;Acc:HGNC:15448]	GOLIM4	1801.12	-0.237959	0.0449757	-5.29082	1.21767e-07	2.05712e-06
ENSG00000141425,18	55197	regulation of nuclear pre-mRNA domain containing 1A [Source:HGNC Symbol;Acc:HGNC:25560]	RPRD1A	346.325	-0.361556	0.0683578	-5.28917	1.2287e-07	2.07397e-06
ENSG00000174628,16	124152	IQ motif containing K [Source:HGNC Symbol;Acc:HGNC:28556]	IQCK	418.917	-0.314329	0.0594453	-5.2877	1.23866e-07	2.089e-06
ENSG00000241839,10	80301	pleckstrin homology domain containing O2 [Source:HGNC Symbol;Acc:HGNC:30026]	PLEKHO2	155.503	-0.44499	0.0841766	-5.28639	1.24753e-07	2.10216e-06
ENSG00000065989,16	5141	phosphodiesterase 4A [Source:HGNC Symbol;Acc:HGNC:8780]	PDE4A	144.814	-0.45356	0.0858032	-5.28605	1.24987e-07	2.10431e-06
ENSG00000173898,13	6712	spectrin beta, non-erythrocytic 2 [Source:HGNC Symbol;Acc:HGNC:11276]	SPTBN2	74.8825	-0.826947	0.156505	-5.28383	1.26514e-07	2.12819e-06
ENSG00000140948,12	23174	zinc finger CCHC-type containing 14 [Source:HGNC Symbol;Acc:HGNC:24134]	ZCCHC14	488.037	-0.27437	0.0519349	-5.28296	1.27114e-07	2.13647e-06
ENSG00000174500,13	257144	germinal center associated signaling and motility [Source:HGNC Symbol;Acc:HGNC:20253]	GCSAM	10.1266	1.84547	0.349386	5.28204	1.27751e-07	2.14535e-06
ENSG00000006210,7	6376	C-X3-C motif chemokine ligand 1 [Source:HGNC Symbol;Acc:HGNC:10647]	CX3CL1	100.187	-0.621246	0.117642	-5.2808	1.28619e-07	2.15809e-06
ENSG00000055118,15	3757	potassium voltage-gated channel subfamily H member 2 [Source:HGNC Symbol;Acc:HGNC:6251]	KCNH2	69.5021	-0.917931	0.173831	-5.2806	1.28761e-07	2.15864e-06
ENSG00000088756,12	79822	Rho GTPase activating protein 28 [Source:HGNC Symbol;Acc:HGNC:25509]	ARHGAP28	4.45229	3.19276	0.604786	5.27915	1.29787e-07	2.17151e-06
ENSG00000155380,11	6566	solute carrier family 16 member 1 [Source:HGNC Symbol;Acc:HGNC:10922]	SLC16A1	1582.48	0.326814	0.0619068	5.27913	1.298e-07	2.17151e-06
ENSG00000225216,6	NA	novel transcript	AC007362,1	30.9222	-1.02112	0.193429	-5.27904	1.29859e-07	2.17151e-06
ENSG00000119408,16	10783	NIMA related kinase 6 [Source:HGNC Symbol;Acc:HGNC:7749]	NEK6	1211.06	-0.263271	0.0498733	-5.27879	1.3004e-07	2.17269e-06
ENSG00000168175,15	93487	mitogen-activated protein kinase 1 interacting protein 1 like [Source:HGNC Symbol;Acc:HGNC:19840]	MAPK1IP1L	1327.88	0.209	0.0396019	5.27751	1.30948e-07	2.18602e-06
ENSG00000100625,9	51804	SIX homeobox 4 [Source:HGNC Symbol;Acc:HGNC:10890]	SIX4	43.3644	0.843433	0.159873	5.27564	1.32294e-07	2.20576e-06
ENSG00000105520,10	64748	phospholipid phosphatase related 2 [Source:HGNC Symbol;Acc:HGNC:29566]	PLPPR2	371.899	-0.496868	0.0941859	-5.2754	1.32466e-07	2.20576e-06
ENSG00000153187,20	3192	heterogeneous nuclear ribonucleoprotein U [Source:HGNC Symbol;Acc:HGNC:5048]	HNRNPU	5478.48	0.200473	0.0380006	5.27552	1.3238e-07	2.20576e-06
ENSG00000237949,2	NA	long intergenic non-protein coding RNA 844 [Source:HGNC Symbol;Acc:HGNC:45031]	LINC00844	3.54194	2.73734	0.518929	5.27498	1.32767e-07	2.2089e-06
ENSG00000143850,16	22874	pleckstrin homology domain containing A6 [Source:HGNC Symbol;Acc:HGNC:17053]	PLEKHA6	33.8924	-1.15633	0.219254	-5.27394	1.33526e-07	2.21966e-06
ENSG00000184635,16	81931	zinc finger protein 93 [Source:HGNC Symbol;Acc:HGNC:13169]	ZNF93	194.213	0.374925	0.0711305	5.27094	1.35725e-07	2.25431e-06
ENSG00000111665,11	83461	cell division cycle associated 3 [Source:HGNC Symbol;Acc:HGNC:14624]	CDCA3	497.659	0.321165	0.0609378	5.27038	1.36141e-07	2.25742e-06
ENSG00000166037,11	9702	centrosomal protein 57 [Source:HGNC Symbol;Acc:HGNC:30794]	CEP57	526.041	0.32692	0.0620296	5.27039	1.36134e-07	2.25742e-06
ENSG00000114853,14	92999	zinc finger and BTB domain containing 47 [Source:HGNC Symbol;Acc:HGNC:26955]	ZBTB47	207.504	-0.424974	0.0806731	-5.26785	1.3803e-07	2.28683e-06
ENSG00000104964,14	166	TLE family member 5, transcriptional modulator [Source:HGNC Symbol;Acc:HGNC:307]	TLE5	2252.49	-0.35136	0.0667092	-5.26704	1.38638e-07	2.2949e-06
ENSG00000126368,6	9572	nuclear receptor subfamily 1 group D member 1 [Source:HGNC Symbol;Acc:HGNC:7962]	NR1D1	141.339	-0.751481	0.14268	-5.2669	1.3875e-07	2.2949e-06
ENSG00000196172,9	148213	zinc finger protein 681 [Source:HGNC Symbol;Acc:HGNC:26457]	ZNF681	47.1662	0.706276	0.134126	5.26576	1.39611e-07	2.3072e-06
ENSG00000114812,13	7433	vasoactive intestinal peptide receptor 1 [Source:HGNC Symbol;Acc:HGNC:12694]	VIPR1	844.262	0.425027	0.0807176	5.2656	1.3973e-07	2.30724e-06
ENSG00000166128,13	51762	RAB8B, member RAS oncogene family [Source:HGNC Symbol;Acc:HGNC:30273]	RAB8B	573.383	-0.418064	0.0794053	-5.26494	1.40238e-07	2.31369e-06
ENSG00000197321,14	6840	supervillin [Source:HGNC Symbol;Acc:HGNC:11480]	SVIL	75.6293	0.611199	0.116129	5.26309	1.41655e-07	2.33512e-06
ENSG00000040933,15	3631	inositol polyphosphate-4-phosphatase type I A [Source:HGNC Symbol;Acc:HGNC:6074]	INPP4A	397.575	-0.294539	0.0559746	-5.26201	1.42488e-07	2.34689e-06
ENSG00000112378,12	64065	p53 apoptosis effector related to PMP22 [Source:HGNC Symbol;Acc:HGNC:17637]	PERP	96.4689	0.664482	0.126295	5.26134	1.4301e-07	2.35352e-06
ENSG00000196757,8	90592	zinc finger protein 700 [Source:HGNC Symbol;Acc:HGNC:25292]	ZNF700	253.456	0.381171	0.0724865	5.2585	1.45234e-07	2.38813e-06
ENSG00000134109,11	9695	ER degradation enhancing alpha-mannosidase like protein 1 [Source:HGNC Symbol;Acc:HGNC:18967]	EDEM1	514.272	-0.317646	0.0604771	-5.25234	1.50181e-07	2.46742e-06
ENSG00000140264,19	10169	small EDRK-rich factor 2 [Source:HGNC Symbol;Acc:HGNC:10757]	SERF2	1846.48	-0.359924	0.0685374	-5.2515	1.50867e-07	2.47662e-06
ENSG00000134030,14	9811	cap binding complex dependent translation initiation factor [Source:HGNC Symbol;Acc:HGNC:23925]	CTIF	112.956	-0.534632	0.101817	-5.25093	1.51332e-07	2.48219e-06
ENSG00000072071,16	22859	adhesion G protein-coupled receptor L1 [Source:HGNC Symbol;Acc:HGNC:20973]	ADGRL1	924.093	-0.504371	0.0960899	-5.24894	1.52974e-07	2.50704e-06
ENSG00000083290,20	9706	unc-51 like autophagy activating kinase 2 [Source:HGNC Symbol;Acc:HGNC:13480]	ULK2	173.267	-0.421635	0.0803473	-5.24765	1.54048e-07	2.52255e-06
ENSG00000144218,19	3899	AF4/FMR2 family member 3 [Source:HGNC Symbol;Acc:HGNC:6473]	AFF3	13.3549	1.40714	0.268248	5.24566	1.5572e-07	2.54782e-06
ENSG00000244681,1	NA	methylenetetrahydrofolate dehydrogenase (NADP+ dependent) 2, methenyltetrahydrofolate cyclohydrolase pseudogene 1 [Source:HGNC Symbol;Acc:HGNC:48859]	MTHFD2P1	22.0754	-1.06141	0.202378	-5.24468	1.56554e-07	2.55935e-06
ENSG00000186716,21	613	BCR activator of RhoGEF and GTPase [Source:HGNC Symbol;Acc:HGNC:1014]	BCR	176.953	-0.446611	0.0851743	-5.24349	1.57568e-07	2.57378e-06
ENSG00000168785,8	10098	tetraspanin 5 [Source:HGNC Symbol;Acc:HGNC:17753]	TSPAN5	613.085	-0.272615	0.0519991	-5.24269	1.58254e-07	2.58285e-06
ENSG00000065060,17	54887	UHRF1 binding protein 1 [Source:HGNC Symbol;Acc:HGNC:21216]	UHRF1BP1	360.281	0.294842	0.0562685	5.2399	1.60661e-07	2.61997e-06
ENSG00000145687,16	23635	single stranded DNA binding protein 2 [Source:HGNC Symbol;Acc:HGNC:15831]	SSBP2	540.087	-0.36457	0.0695875	-5.23902	1.6143e-07	2.63033e-06
ENSG00000233695,2	NA	GAS6 antisense RNA 1 [Source:HGNC Symbol;Acc:HGNC:39826]	GAS6-AS1	20.2487	-1.32531	0.252992	-5.23853	1.61864e-07	2.63523e-06
ENSG00000115170,14	90	activin A receptor type 1 [Source:HGNC Symbol;Acc:HGNC:171]	ACVR1	77.3681	0.578634	0.110464	5.23823	1.62124e-07	2.63728e-06
ENSG00000160293,17	7410	vav guanine nucleotide exchange factor 2 [Source:HGNC Symbol;Acc:HGNC:12658]	VAV2	564.293	-0.301791	0.057642	-5.23562	1.64433e-07	2.67264e-06
ENSG00000174306,21	23051	zinc fingers and homeoboxes 3 [Source:HGNC Symbol;Acc:HGNC:15935]	ZHX3	785.027	-0.256946	0.0490801	-5.23523	1.64777e-07	2.67603e-06
ENSG00000149554,13	1111	checkpoint kinase 1 [Source:HGNC Symbol;Acc:HGNC:1925]	CHEK1	520.746	0.291395	0.0557544	5.2264	1.72839e-07	2.80465e-06
ENSG00000134042,13	83876	maestro [Source:HGNC Symbol;Acc:HGNC:24121]	MRO	7.66981	-1.90971	0.36556	-5.22406	1.75038e-07	2.838e-06
ENSG00000119596,18	56252	YLP motif containing 1 [Source:HGNC Symbol;Acc:HGNC:17798]	YLPM1	980.494	0.257427	0.0492848	5.22327	1.75794e-07	2.84792e-06
ENSG00000136830,12	64855	niban apoptosis regulator 2 [Source:HGNC Symbol;Acc:HGNC:25282]	NIBAN2	181.926	-0.605517	0.115945	-5.22244	1.76583e-07	2.85836e-06
ENSG00000075461,6	27092	calcium voltage-gated channel auxiliary subunit gamma 4 [Source:HGNC Symbol;Acc:HGNC:1408]	CACNG4	103.093	-0.435276	0.0834011	-5.21906	1.7983e-07	2.90854e-06
ENSG00000160781,17	79957	progestin and adipoQ receptor family member 6 [Source:HGNC Symbol;Acc:HGNC:30132]	PAQR6	196.988	-0.641289	0.122883	-5.21869	1.80189e-07	2.90957e-06
ENSG00000163382,12	128240	NAD(P)HX epimerase [Source:HGNC Symbol;Acc:HGNC:18453]	NAXE	187.284	0.460141	0.0881693	5.21884	1.80049e-07	2.90957e-06
ENSG00000213079,9	22828	SR-related CTD associated factor 8 [Source:HGNC Symbol;Acc:HGNC:20959]	SCAF8	458.996	0.299187	0.0573412	5.21766	1.81196e-07	2.92343e-06
ENSG00000087495,17	116154	phosphatase and actin regulator 3 [Source:HGNC Symbol;Acc:HGNC:15833]	PHACTR3	10.6061	3.31143	0.634705	5.21727	1.81575e-07	2.92715e-06
ENSG00000151445,16	63894	VPS33B interacting protein, apical-basolateral polarity regulator, spe-39 homolog [Source:HGNC Symbol;Acc:HGNC:20347]	VIPAS39	240.263	0.335774	0.0643766	5.21577	1.83053e-07	2.94857e-06
ENSG00000139970,17	6252	reticulon 1 [Source:HGNC Symbol;Acc:HGNC:10467]	RTN1	1326.67	-0.254102	0.0487667	-5.21056	1.88276e-07	3.03022e-06
ENSG00000091986,15	151887	coiled-coil domain containing 80 [Source:HGNC Symbol;Acc:HGNC:30649]	CCDC80	974.018	0.219029	0.0420514	5.20861	1.90262e-07	3.0597e-06
ENSG00000196586,16	4646	myosin VI [Source:HGNC Symbol;Acc:HGNC:7605]	MYO6	329.048	-0.372571	0.0715692	-5.20574	1.93224e-07	3.10479e-06
ENSG00000166822,13	124491	transmembrane protein 170A [Source:HGNC Symbol;Acc:HGNC:29577]	TMEM170A	282.641	-0.41533	0.0798	-5.20463	1.94379e-07	3.12082e-06
ENSG00000100519,12	5706	proteasome 26S subunit, ATPase 6 [Source:HGNC Symbol;Acc:HGNC:9553]	PSMC6	588.894	0.375963	0.072257	5.20313	1.95961e-07	3.14366e-06
ENSG00000213809,9	22914	killer cell lectin like receptor K1 [Source:HGNC Symbol;Acc:HGNC:18788]	KLRK1	6.65229	2.50813	0.482097	5.20254	1.96585e-07	3.15111e-06
ENSG00000104824,17	3191	heterogeneous nuclear ribonucleoprotein L [Source:HGNC Symbol;Acc:HGNC:5045]	HNRNPL	888.884	0.208534	0.0400921	5.20137	1.97822e-07	3.16836e-06
ENSG00000137434,11	347744	chromosome 6 open reading frame 52 [Source:HGNC Symbol;Acc:HGNC:20881]	C6orf52	21.4531	1.17207	0.225363	5.20081	1.98418e-07	3.17533e-06
ENSG00000007944,15	29116	myosin regulatory light chain interacting protein [Source:HGNC Symbol;Acc:HGNC:21155]	MYLIP	12.2771	1.36718	0.262952	5.19936	1.99972e-07	3.1976e-06
ENSG00000112739,17	8899	pre-mRNA processing factor 4B [Source:HGNC Symbol;Acc:HGNC:17346]	PRPF4B	936.525	0.348899	0.0671106	5.19887	2.00503e-07	3.20351e-06
ENSG00000247092,7	NA	small nucleolar RNA host gene 10 [Source:HGNC Symbol;Acc:HGNC:27510]	SNHG10	72.0636	0.587644	0.11304	5.19854	2.00859e-07	3.20659e-06
ENSG00000053372,5	51154	MRT4 homolog, ribosome maturation factor [Source:HGNC Symbol;Acc:HGNC:18477]	MRTO4	294.078	0.340954	0.0656109	5.19662	2.02949e-07	3.23735e-06
ENSG00000034713,8	11345	GABA type A receptor associated protein like 2 [Source:HGNC Symbol;Acc:HGNC:13291]	GABARAPL2	596.013	-0.359971	0.0692933	-5.19489	2.04845e-07	3.26494e-06
ENSG00000137501,17	54843	synaptotagmin like 2 [Source:HGNC Symbol;Acc:HGNC:15585]	SYTL2	217.148	0.561687	0.10814	5.19406	2.05754e-07	3.27679e-06
ENSG00000185880,13	140691	tripartite motif containing 69 [Source:HGNC Symbol;Acc:HGNC:17857]	TRIM69	284.834	-0.318719	0.0613755	-5.19294	2.06995e-07	3.29389e-06
ENSG00000114107,9	80321	centrosomal protein 70 [Source:HGNC Symbol;Acc:HGNC:29972]	CEP70	201.011	-0.424066	0.0816726	-5.19226	2.07752e-07	3.30327e-06
ENSG00000089154,11	10985	GCN1 activator of EIF2AK4 [Source:HGNC Symbol;Acc:HGNC:4199]	GCN1	899.045	0.323842	0.062374	5.19194	2.08113e-07	3.30635e-06
ENSG00000171566,12	5356	pleiotropic regulator 1 [Source:HGNC Symbol;Acc:HGNC:9089]	PLRG1	279.756	0.412811	0.079582	5.18723	2.1344e-07	3.38826e-06
ENSG00000272325,2	11165	nudix hydrolase 3 [Source:HGNC Symbol;Acc:HGNC:8050]	NUDT3	1109	0.270993	0.0522726	5.18422	2.16925e-07	3.44081e-06
ENSG00000102760,13	28984	regulator of cell cycle [Source:HGNC Symbol;Acc:HGNC:20369]	RGCC	6.06919	2.06099	0.397735	5.18181	2.19741e-07	3.4808e-06
ENSG00000159164,10	9900	synaptic vesicle glycoprotein 2A [Source:HGNC Symbol;Acc:HGNC:20566]	SV2A	1554.52	-0.212189	0.0409493	-5.18176	2.19799e-07	3.4808e-06
ENSG00000099194,6	6319	stearoyl-CoA desaturase [Source:HGNC Symbol;Acc:HGNC:10571]	SCD	8682.35	-0.334687	0.0646051	-5.18051	2.2128e-07	3.50143e-06
ENSG00000115866,11	1615	aspartyl-tRNA synthetase [Source:HGNC Symbol;Acc:HGNC:2678]	DARS	483.731	0.325807	0.0628926	5.18036	2.21457e-07	3.50143e-06
ENSG00000171302,17	124583	calcium activated nucleotidase 1 [Source:HGNC Symbol;Acc:HGNC:19721]	CANT1	362.314	-0.371818	0.0718306	-5.17632	2.26311e-07	3.57531e-06
ENSG00000123836,15	5208	6-phosphofructo-2-kinase/fructose-2,6-biphosphatase 2 [Source:HGNC Symbol;Acc:HGNC:8873]	PFKFB2	233.361	-0.347629	0.0671716	-5.17523	2.27627e-07	3.59323e-06
ENSG00000164197,12	285671	ring finger protein 180 [Source:HGNC Symbol;Acc:HGNC:27752]	RNF180	125.479	-0.598803	0.115709	-5.17506	2.27833e-07	3.59361e-06
ENSG00000198298,13	220992	zinc finger protein 485 [Source:HGNC Symbol;Acc:HGNC:23440]	ZNF485	26.8795	0.958951	0.185344	5.1739	2.29258e-07	3.61319e-06
ENSG00000166451,13	55839	centromere protein N [Source:HGNC Symbol;Acc:HGNC:30873]	CENPN	385.21	0.263447	0.0509272	5.17301	2.30353e-07	3.62755e-06
ENSG00000138336,9	80312	tet methylcytosine dioxygenase 1 [Source:HGNC Symbol;Acc:HGNC:29484]	TET1	175.701	0.488909	0.0945209	5.17249	2.30989e-07	3.63468e-06
ENSG00000111445,14	5985	replication factor C subunit 5 [Source:HGNC Symbol;Acc:HGNC:9973]	RFC5	293.101	0.384662	0.0743853	5.1712	2.32591e-07	3.65695e-06
ENSG00000132199,20	55556	enolase superfamily member 1 [Source:HGNC Symbol;Acc:HGNC:30365]	ENOSF1	1019.93	0.234452	0.045386	5.16573	2.39507e-07	3.7627e-06
ENSG00000039560,14	26064	retinoic acid induced 14 [Source:HGNC Symbol;Acc:HGNC:14873]	RAI14	346.655	0.328102	0.0635669	5.16153	2.44938e-07	3.84497e-06
ENSG00000108797,12	8506	contactin associated protein 1 [Source:HGNC Symbol;Acc:HGNC:8011]	CNTNAP1	608.253	-0.369413	0.0716135	-5.15844	2.49021e-07	3.90595e-06
ENSG00000168495,13	661	RNA polymerase III subunit D [Source:HGNC Symbol;Acc:HGNC:1080]	POLR3D	288.086	0.32945	0.0638725	5.15793	2.49691e-07	3.91335e-06
ENSG00000067191,16	782	calcium voltage-gated channel auxiliary subunit beta 1 [Source:HGNC Symbol;Acc:HGNC:1401]	CACNB1	142.774	-0.708293	0.137359	-5.1565	2.51605e-07	3.93397e-06
ENSG00000162430,17	57190	selenoprotein N [Source:HGNC Symbol;Acc:HGNC:15999]	SELENON	1630.16	-0.358155	0.0694534	-5.15676	2.51255e-07	3.93397e-06
ENSG00000166340,17	1200	tripeptidyl peptidase 1 [Source:HGNC Symbol;Acc:HGNC:2073]	TPP1	746.583	-0.257495	0.0499356	-5.15655	2.51538e-07	3.93397e-06
ENSG00000109881,17	91057	coiled-coil domain containing 34 [Source:HGNC Symbol;Acc:HGNC:25079]	CCDC34	256.081	0.403418	0.0782865	5.1531	2.56211e-07	4.00281e-06
ENSG00000065809,13	83641	family with sequence similarity 107 member B [Source:HGNC Symbol;Acc:HGNC:23726]	FAM107B	270.217	0.360749	0.0700232	5.15185	2.57931e-07	4.0265e-06
ENSG00000177302,15	7156	DNA topoisomerase III alpha [Source:HGNC Symbol;Acc:HGNC:11992]	TOP3A	447.059	0.291901	0.0566743	5.1505	2.59799e-07	4.05245e-06
ENSG00000140931,20	123920	CKLF like MARVEL transmembrane domain containing 3 [Source:HGNC Symbol;Acc:HGNC:19174]	CMTM3	537.554	-0.251792	0.0489039	-5.1487	2.62292e-07	4.08811e-06
ENSG00000100427,15	23209	modulator of VRAC current 1 [Source:HGNC Symbol;Acc:HGNC:17082]	MLC1	3621.2	-0.374471	0.0727813	-5.14516	2.673e-07	4.16287e-06
ENSG00000154330,13	5239	phosphoglucomutase 5 [Source:HGNC Symbol;Acc:HGNC:8908]	PGM5	6.20946	1.76777	0.343707	5.14324	2.70034e-07	4.20213e-06
ENSG00000132768,14	1802	diphthamide biosynthesis 2 [Source:HGNC Symbol;Acc:HGNC:3004]	DPH2	205.457	0.422837	0.0822154	5.14304	2.70323e-07	4.20333e-06
ENSG00000188976,11	26155	NOC2 like nucleolar associated transcriptional repressor [Source:HGNC Symbol;Acc:HGNC:24517]	NOC2L	520.634	0.441427	0.0858551	5.14153	2.72504e-07	4.2339e-06
ENSG00000164841,5	157753	transmembrane protein 74 [Source:HGNC Symbol;Acc:HGNC:26409]	TMEM74	25.5534	1.03894	0.202151	5.13944	2.75563e-07	4.27805e-06
ENSG00000247077,7	192111	PGAM family member 5, mitochondrial serine/threonine protein phosphatase [Source:HGNC Symbol;Acc:HGNC:28763]	PGAM5	260.555	0.35534	0.0691555	5.13827	2.77278e-07	4.3013e-06
ENSG00000111674,9	2026	enolase 2 [Source:HGNC Symbol;Acc:HGNC:3353]	ENO2	2250.15	-0.240403	0.0467901	-5.1379	2.77824e-07	4.30637e-06
ENSG00000112769,20	3910	laminin subunit alpha 4 [Source:HGNC Symbol;Acc:HGNC:6484]	LAMA4	840.369	0.210859	0.0410505	5.13658	2.79789e-07	4.33343e-06
ENSG00000090889,12	24137	kinesin family member 4A [Source:HGNC Symbol;Acc:HGNC:13339]	KIF4A	733.955	0.296714	0.0577729	5.13586	2.80856e-07	4.34654e-06
ENSG00000132646,11	5111	proliferating cell nuclear antigen [Source:HGNC Symbol;Acc:HGNC:8729]	PCNA	711.834	0.258546	0.0503498	5.135	2.82143e-07	4.36304e-06
ENSG00000140367,12	92912	ubiquitin conjugating enzyme E2 Q2 [Source:HGNC Symbol;Acc:HGNC:19248]	UBE2Q2	279.529	-0.355638	0.0692606	-5.13478	2.82476e-07	4.36477e-06
ENSG00000162545,6	55450	calcium/calmodulin dependent protein kinase II inhibitor 1 [Source:HGNC Symbol;Acc:HGNC:24190]	CAMK2N1	120.937	0.485073	0.0945101	5.1325	2.85923e-07	4.41457e-06
ENSG00000126709,15	2537	interferon alpha inducible protein 6 [Source:HGNC Symbol;Acc:HGNC:4054]	IFI6	35.3737	-0.91133	0.177714	-5.12806	2.92747e-07	4.5164e-06
ENSG00000074582,14	617	BCS1 homolog, ubiquinol-cytochrome c reductase complex chaperone [Source:HGNC Symbol;Acc:HGNC:1020]	BCS1L	167.649	0.377931	0.0737214	5.12648	2.95216e-07	4.54739e-06
ENSG00000134824,14	9415	fatty acid desaturase 2 [Source:HGNC Symbol;Acc:HGNC:3575]	FADS2	1470.97	-0.240038	0.0468224	-5.12657	2.95076e-07	4.54739e-06
ENSG00000127914,16	10142	A-kinase anchoring protein 9 [Source:HGNC Symbol;Acc:HGNC:379]	AKAP9	797.435	0.39326	0.076732	5.12511	2.97368e-07	4.57697e-06
ENSG00000115159,16	2820	glycerol-3-phosphate dehydrogenase 2 [Source:HGNC Symbol;Acc:HGNC:4456]	GPD2	829.161	0.276263	0.0539116	5.12438	2.98523e-07	4.59117e-06
ENSG00000119608,12	283571	prospero homeobox 2 [Source:HGNC Symbol;Acc:HGNC:26715]	PROX2	20.9611	1.08679	0.212138	5.12301	3.00695e-07	4.62096e-06
ENSG00000106624,11	165	AE binding protein 1 [Source:HGNC Symbol;Acc:HGNC:303]	AEBP1	516.473	-0.379638	0.0741154	-5.12225	3.01908e-07	4.63238e-06
ENSG00000161671,16	284361	ER membrane protein complex subunit 10 [Source:HGNC Symbol;Acc:HGNC:27609]	EMC10	252.674	-0.51321	0.100192	-5.12228	3.01866e-07	4.63238e-06
ENSG00000122557,10	64224	HERPUD family member 2 [Source:HGNC Symbol;Acc:HGNC:21915]	HERPUD2	286.985	0.302672	0.0591351	5.11831	3.08285e-07	4.72656e-06
ENSG00000134001,13	1965	eukaryotic translation initiation factor 2 subunit alpha [Source:HGNC Symbol;Acc:HGNC:3265]	EIF2S1	1034.92	0.281446	0.0550011	5.11709	3.10288e-07	4.75358e-06
ENSG00000127952,17	51657	serine/threonine/tyrosine interacting like 1 [Source:HGNC Symbol;Acc:HGNC:18165]	STYXL1	178.556	0.408684	0.0798759	5.11649	3.11267e-07	4.76488e-06
ENSG00000169083,17	367	androgen receptor [Source:HGNC Symbol;Acc:HGNC:644]	AR	344.429	0.311486	0.0608845	5.11601	3.12066e-07	4.7734e-06
ENSG00000151779,13	51594	neuroblastoma amplified sequence [Source:HGNC Symbol;Acc:HGNC:15625]	NBAS	396.143	-0.346977	0.0678426	-5.11444	3.14673e-07	4.80955e-06
ENSG00000108309,14	10900	RUN domain containing 3A [Source:HGNC Symbol;Acc:HGNC:16984]	RUNDC3A	75.4752	-0.764918	0.149793	-5.10651	3.28169e-07	5.01195e-06
ENSG00000100307,13	23492	chromobox 7 [Source:HGNC Symbol;Acc:HGNC:1557]	CBX7	95.839	-0.608845	0.119269	-5.10483	3.31094e-07	5.05271e-06
ENSG00000100196,11	11015	KDEL endoplasmic reticulum protein retention receptor 3 [Source:HGNC Symbol;Acc:HGNC:6306]	KDELR3	190.829	-0.458342	0.0898068	-5.10365	3.33169e-07	5.07651e-06
ENSG00000204650,14	NA	long intergenic non-protein coding RNA 2210 [Source:HGNC Symbol;Acc:HGNC:26327]	LINC02210	100.692	-0.533632	0.104558	-5.10371	3.33051e-07	5.07651e-06
ENSG00000113161,16	3156	3-hydroxy-3-methylglutaryl-CoA reductase [Source:HGNC Symbol;Acc:HGNC:5006]	HMGCR	2168.93	-0.365363	0.0715973	-5.10302	3.34269e-07	5.08935e-06
ENSG00000146731,11	908	chaperonin containing TCP1 subunit 6A [Source:HGNC Symbol;Acc:HGNC:1620]	CCT6A	3280.85	0.265861	0.0521022	5.10268	3.34875e-07	5.09464e-06
ENSG00000126500,3	23769	fibronectin leucine rich transmembrane protein 1 [Source:HGNC Symbol;Acc:HGNC:3760]	FLRT1	31.354	-1.05045	0.205893	-5.10193	3.36209e-07	5.111e-06
ENSG00000079246,16	7520	X-ray repair cross complementing 5 [Source:HGNC Symbol;Acc:HGNC:12833]	XRCC5	3114.77	0.271326	0.0531868	5.10138	3.37189e-07	5.11801e-06
ENSG00000131652,14	79228	THO complex 6 [Source:HGNC Symbol;Acc:HGNC:28369]	THOC6	98.5048	0.64013	0.125482	5.10139	3.37174e-07	5.11801e-06
ENSG00000165209,19	55342	spermatid perinuclear RNA binding protein [Source:HGNC Symbol;Acc:HGNC:16462]	STRBP	179.002	-0.435898	0.0854802	-5.0994	3.40723e-07	5.16768e-06
ENSG00000196569,12	3908	laminin subunit alpha 2 [Source:HGNC Symbol;Acc:HGNC:6482]	LAMA2	886.404	-0.256853	0.0503733	-5.09899	3.41478e-07	5.17514e-06
ENSG00000232682,2	NA	novel transcript, antisense to ANK3	AL592430,1	55.0169	0.678178	0.133138	5.09379	3.50969e-07	5.3149e-06
ENSG00000257218,6	283459	glutamyl-tRNA amidotransferase subunit C [Source:HGNC Symbol;Acc:HGNC:25068]	GATC	616.128	0.290531	0.0570575	5.0919	3.54501e-07	5.36427e-06
ENSG00000167202,11	23102	TBC1 domain family member 2B [Source:HGNC Symbol;Acc:HGNC:29183]	TBC1D2B	250.381	-0.355323	0.0697896	-5.09135	3.55523e-07	5.37562e-06
ENSG00000137486,17	408	arrestin beta 1 [Source:HGNC Symbol;Acc:HGNC:711]	ARRB1	44.2617	-0.756457	0.148597	-5.09067	3.56799e-07	5.39078e-06
ENSG00000085377,14	5550	prolyl endopeptidase [Source:HGNC Symbol;Acc:HGNC:9358]	PREP	218.694	0.37733	0.0742394	5.0826	3.723e-07	5.62067e-06
ENSG00000112977,15	1611	death associated protein [Source:HGNC Symbol;Acc:HGNC:2672]	DAP	818.239	-0.247686	0.0487646	-5.07922	3.78978e-07	5.71712e-06
ENSG00000124532,14	57380	magnesium transporter MRS2 [Source:HGNC Symbol;Acc:HGNC:13785]	MRS2	103.43	0.486218	0.0957671	5.07709	3.83258e-07	5.77727e-06
ENSG00000256364,1	NA	novel transcript, antisense to MLEC	AC069234,2	392.239	0.344774	0.0679278	5.07559	3.86286e-07	5.81847e-06
ENSG00000146263,11	253714	MMS22 like, DNA repair protein [Source:HGNC Symbol;Acc:HGNC:21475]	MMS22L	399.272	0.316501	0.0624008	5.07207	3.93503e-07	5.92265e-06
ENSG00000204540,11	170679	psoriasis susceptibility 1 candidate 1 [Source:HGNC Symbol;Acc:HGNC:17202]	PSORS1C1	36.4232	-0.935544	0.184489	-5.071	3.95726e-07	5.95157e-06
ENSG00000021300,14	58473	pleckstrin homology domain containing B1 [Source:HGNC Symbol;Acc:HGNC:19079]	PLEKHB1	247.159	-0.32384	0.0639415	-5.06463	4.09184e-07	6.14929e-06
ENSG00000156642,17	27020	neuroplastin [Source:HGNC Symbol;Acc:HGNC:17867]	NPTN	471.596	-0.321254	0.0634446	-5.06354	4.11552e-07	6.18017e-06
ENSG00000249087,7	NA	ZNF436 antisense RNA 1 [Source:HGNC Symbol;Acc:HGNC:25122]	ZNF436-AS1	129.118	-0.504084	0.0995656	-5.06283	4.13068e-07	6.19822e-06
ENSG00000112110,10	29074	mitochondrial ribosomal protein L18 [Source:HGNC Symbol;Acc:HGNC:14477]	MRPL18	280.549	0.343012	0.0677621	5.062	4.14881e-07	6.22069e-06
ENSG00000213551,6	23234	DnaJ heat shock protein family (Hsp40) member C9 [Source:HGNC Symbol;Acc:HGNC:19123]	DNAJC9	411.932	0.266744	0.0527075	5.06083	4.1743e-07	6.24942e-06
ENSG00000225783,8	440823	myocardial infarction associated transcript [Source:HGNC Symbol;Acc:HGNC:33425]	MIAT	213.006	-0.570538	0.112735	-5.06089	4.17304e-07	6.24942e-06
ENSG00000203879,12	2664	GDP dissociation inhibitor 1 [Source:HGNC Symbol;Acc:HGNC:4226]	GDI1	1607.86	-0.245505	0.0485197	-5.05991	4.19463e-07	6.27509e-06
ENSG00000064393,16	28996	homeodomain interacting protein kinase 2 [Source:HGNC Symbol;Acc:HGNC:14402]	HIPK2	947.567	0.205967	0.0407126	5.05905	4.21358e-07	6.29867e-06
ENSG00000101290,14	8760	CDP-diacylglycerol synthase 2 [Source:HGNC Symbol;Acc:HGNC:1801]	CDS2	272.045	-0.340522	0.0673313	-5.05742	4.24972e-07	6.34787e-06
ENSG00000164934,14	25879	DDB1 and CUL4 associated factor 13 [Source:HGNC Symbol;Acc:HGNC:24535]	DCAF13	428.091	0.308572	0.061046	5.05474	4.30979e-07	6.43273e-06
ENSG00000263335,1	NA	novel transcript, antisense to MYH11	AF001548,2	24.371	-1.06354	0.210448	-5.05367	4.3341e-07	6.46413e-06
ENSG00000115053,16	4691	nucleolin [Source:HGNC Symbol;Acc:HGNC:7667]	NCL	4782.16	0.248587	0.0491932	5.05327	4.34303e-07	6.47256e-06
ENSG00000168899,5	10791	vesicle associated membrane protein 5 [Source:HGNC Symbol;Acc:HGNC:12646]	VAMP5	47.7797	-0.869203	0.17202	-5.05291	4.3513e-07	6.47998e-06
ENSG00000148429,14	9712	USP6 N-terminal like [Source:HGNC Symbol;Acc:HGNC:16858]	USP6NL	347.951	0.285588	0.0565238	5.05253	4.36002e-07	6.48808e-06
ENSG00000175782,10	55508	solute carrier family 35 member E3 [Source:HGNC Symbol;Acc:HGNC:20864]	SLC35E3	165.7	0.39529	0.0782581	5.0511	4.39272e-07	6.53181e-06
ENSG00000069535,14	4129	monoamine oxidase B [Source:HGNC Symbol;Acc:HGNC:6834]	MAOB	24.7497	-1.23255	0.24403	-5.05081	4.39943e-07	6.53686e-06
ENSG00000151233,11	283464	glucoside xylosyltransferase 1 [Source:HGNC Symbol;Acc:HGNC:27482]	GXYLT1	220.512	0.399106	0.079029	5.05012	4.41539e-07	6.55564e-06
ENSG00000132563,16	51308	receptor accessory protein 2 [Source:HGNC Symbol;Acc:HGNC:17975]	REEP2	277.888	-0.390265	0.0772859	-5.04962	4.42683e-07	6.56769e-06
ENSG00000272851,1	NA	novel transcript	AC096772,1	67.5118	0.578446	0.114586	5.04815	4.46105e-07	6.61348e-06
ENSG00000088812,18	8455	attractin [Source:HGNC Symbol;Acc:HGNC:885]	ATRN	480.31	-0.276643	0.0548085	-5.04745	4.47754e-07	6.63294e-06
ENSG00000107331,17	20	ATP binding cassette subfamily A member 2 [Source:HGNC Symbol;Acc:HGNC:32]	ABCA2	1062.38	-0.650087	0.12882	-5.04648	4.50023e-07	6.66155e-06
ENSG00000107518,18	26033	attractin like 1 [Source:HGNC Symbol;Acc:HGNC:29063]	ATRNL1	12.5954	-2.14847	0.425855	-5.04508	4.53342e-07	6.70565e-06
ENSG00000100764,14	5700	proteasome 26S subunit, ATPase 1 [Source:HGNC Symbol;Acc:HGNC:9547]	PSMC1	478.953	0.325235	0.0644723	5.04457	4.54542e-07	6.71837e-06
ENSG00000184232,9	220323	out at first homolog [Source:HGNC Symbol;Acc:HGNC:28752]	OAF	92.349	-0.552871	0.109603	-5.04432	4.55139e-07	6.72215e-06
ENSG00000203880,12	55251	protein-L-isoaspartate (D-aspartate) O-methyltransferase domain containing 2 [Source:HGNC Symbol;Acc:HGNC:15882]	PCMTD2	1220.13	-0.281399	0.0558269	-5.04056	4.6417e-07	6.85041e-06
ENSG00000075413,18	4140	microtubule affinity regulating kinase 3 [Source:HGNC Symbol;Acc:HGNC:6897]	MARK3	865.961	0.260697	0.0517568	5.03696	4.72988e-07	6.97534e-06
ENSG00000253910,2	56103	protocadherin gamma subfamily B, 2 [Source:HGNC Symbol;Acc:HGNC:8709]	PCDHGB2	590.027	-0.324845	0.064511	-5.03549	4.76631e-07	7.0238e-06
ENSG00000163412,13	317649	eukaryotic translation initiation factor 4E family member 3 [Source:HGNC Symbol;Acc:HGNC:31837]	EIF4E3	46.5655	-0.982651	0.195204	-5.03396	4.80449e-07	7.07479e-06
ENSG00000184743,13	25923	atlastin GTPase 3 [Source:HGNC Symbol;Acc:HGNC:24526]	ATL3	655.513	0.286793	0.0569752	5.03365	4.81219e-07	7.08085e-06
ENSG00000103037,11	79918	SET domain containing 6, protein lysine methyltransferase [Source:HGNC Symbol;Acc:HGNC:26116]	SETD6	359.304	0.289668	0.0576275	5.02656	4.99366e-07	7.34239e-06
ENSG00000186479,5	401190	regulator of G protein signaling 7 binding protein [Source:HGNC Symbol;Acc:HGNC:23271]	RGS7BP	20.0669	-1.11227	0.22129	-5.02629	5.00058e-07	7.3471e-06
ENSG00000140545,15	4240	milk fat globule-EGF factor 8 protein [Source:HGNC Symbol;Acc:HGNC:7036]	MFGE8	633.32	-0.351662	0.0699711	-5.02582	5.01296e-07	7.3598e-06
ENSG00000168566,13	154007	small nuclear ribonucleoprotein U11/U12 subunit 48 [Source:HGNC Symbol;Acc:HGNC:21368]	SNRNP48	129.307	0.452401	0.0900298	5.02502	5.03387e-07	7.38501e-06
ENSG00000120327,6	56122	protocadherin beta 14 [Source:HGNC Symbol;Acc:HGNC:8685]	PCDHB14	104.258	0.509644	0.101473	5.02244	5.10193e-07	7.4793e-06
ENSG00000115226,10	64838	fibronectin type III domain containing 4 [Source:HGNC Symbol;Acc:HGNC:20239]	FNDC4	75.8659	-0.554614	0.110436	-5.02203	5.11284e-07	7.48972e-06
ENSG00000166313,19	322	amyloid beta precursor protein binding family B member 1 [Source:HGNC Symbol;Acc:HGNC:581]	APBB1	173.475	-0.480323	0.0956577	-5.02127	5.13309e-07	7.50267e-06
ENSG00000188674,11	389073	chromosome 2 open reading frame 80 [Source:HGNC Symbol;Acc:HGNC:34352]	C2orf80	67.5684	-0.684708	0.136356	-5.02149	5.12715e-07	7.50267e-06
ENSG00000250479,8	400916	coiled-coil-helix-coiled-coil-helix domain containing 10 [Source:HGNC Symbol;Acc:HGNC:15559]	CHCHD10	62.4175	-0.726626	0.144706	-5.0214	5.12956e-07	7.50267e-06
ENSG00000101811,13	1478	cleavage stimulation factor subunit 2 [Source:HGNC Symbol;Acc:HGNC:2484]	CSTF2	254.864	0.331028	0.0659478	5.01954	5.1795e-07	7.56491e-06
ENSG00000025039,15	58528	Ras related GTP binding D [Source:HGNC Symbol;Acc:HGNC:19903]	RRAGD	257.051	-0.353373	0.0704294	-5.0174	5.23742e-07	7.64385e-06
ENSG00000110900,15	441631	tetraspanin 11 [Source:HGNC Symbol;Acc:HGNC:30795]	TSPAN11	15.5289	-1.32113	0.263321	-5.01719	5.24329e-07	7.64675e-06
ENSG00000173546,7	1464	chondroitin sulfate proteoglycan 4 [Source:HGNC Symbol;Acc:HGNC:2466]	CSPG4	2032.83	-0.714963	0.142551	-5.01548	5.29026e-07	7.70956e-06
ENSG00000111341,10	4256	matrix Gla protein [Source:HGNC Symbol;Acc:HGNC:7060]	MGP	28.5644	0.838801	0.167377	5.01144	5.40254e-07	7.86738e-06
ENSG00000004478,8	2288	FKBP prolyl isomerase 4 [Source:HGNC Symbol;Acc:HGNC:3720]	FKBP4	617.539	0.283658	0.056607	5.01102	5.41432e-07	7.87871e-06
ENSG00000116977,18	3964	galectin 8 [Source:HGNC Symbol;Acc:HGNC:6569]	LGALS8	310.374	-0.413074	0.0824449	-5.0103	5.4346e-07	7.90239e-06
ENSG00000235189,2	NA	novel transcript	AL034405,1	27.0589	0.91973	0.183617	5.00897	5.47231e-07	7.95137e-06
ENSG00000105877,18	8701	dynein axonemal heavy chain 11 [Source:HGNC Symbol;Acc:HGNC:2942]	DNAH11	502.535	0.319314	0.0637811	5.00642	5.54529e-07	8.05149e-06
ENSG00000204516,10	4277	MHC class I polypeptide-related sequence B [Source:HGNC Symbol;Acc:HGNC:7091]	MICB	11.46	1.1397	0.227724	5.00472	5.59425e-07	8.1166e-06
ENSG00000224982,4	387890	transmembrane protein 233 [Source:HGNC Symbol;Acc:HGNC:37219]	TMEM233	34.4705	-1.70094	0.340064	-5.00183	5.67873e-07	8.23311e-06
ENSG00000120251,20	2891	glutamate ionotropic receptor AMPA type subunit 2 [Source:HGNC Symbol;Acc:HGNC:4572]	GRIA2	536.181	-0.353349	0.070662	-5.00055	5.71673e-07	8.28213e-06
ENSG00000106546,14	196	aryl hydrocarbon receptor [Source:HGNC Symbol;Acc:HGNC:348]	AHR	75.84	0.735938	0.147211	4.99922	5.75624e-07	8.33325e-06
ENSG00000006704,10	9569	GTF2I repeat domain containing 1 [Source:HGNC Symbol;Acc:HGNC:4661]	GTF2IRD1	227.476	-0.413113	0.0826482	-4.99846	5.77909e-07	8.36019e-06
ENSG00000188554,14	4077	NBR1 autophagy cargo receptor [Source:HGNC Symbol;Acc:HGNC:6746]	NBR1	787.492	-0.275591	0.055139	-4.99811	5.78942e-07	8.369e-06
ENSG00000029639,11	51106	transcription factor B1, mitochondrial [Source:HGNC Symbol;Acc:HGNC:17037]	TFB1M	109.36	0.484803	0.0970005	4.99794	5.79454e-07	8.37026e-06
ENSG00000140386,13	49855	S-phase cyclin A associated protein in the ER [Source:HGNC Symbol;Acc:HGNC:13081]	SCAPER	235.192	-0.423472	0.0847535	-4.99651	5.83764e-07	8.42636e-06
ENSG00000198890,9	55170	protein arginine methyltransferase 6 [Source:HGNC Symbol;Acc:HGNC:18241]	PRMT6	147.67	0.387995	0.0776788	4.99486	5.88786e-07	8.49264e-06
ENSG00000084463,8	51729	WW domain binding protein 11 [Source:HGNC Symbol;Acc:HGNC:16461]	WBP11	670.952	0.255813	0.051232	4.99323	5.93789e-07	8.5526e-06
ENSG00000198585,11	131870	nudix hydrolase 16 [Source:HGNC Symbol;Acc:HGNC:26442]	NUDT16	501.44	-0.273278	0.0547298	-4.99322	5.9381e-07	8.5526e-06
ENSG00000221944,8	200765	tigger transposable element derived 1 [Source:HGNC Symbol;Acc:HGNC:14523]	TIGD1	84.973	0.526702	0.105502	4.99235	5.96482e-07	8.58482e-06
ENSG00000163541,12	8802	succinate-CoA ligase alpha subunit [Source:HGNC Symbol;Acc:HGNC:11449]	SUCLG1	486.486	-0.283667	0.0568238	-4.99203	5.97465e-07	8.5927e-06
ENSG00000042088,14	55775	tyrosyl-DNA phosphodiesterase 1 [Source:HGNC Symbol;Acc:HGNC:18884]	TDP1	213.602	0.338151	0.0677607	4.99037	6.02644e-07	8.66086e-06
ENSG00000175745,14	7025	nuclear receptor subfamily 2 group F member 1 [Source:HGNC Symbol;Acc:HGNC:7975]	NR2F1	380.224	-0.282632	0.0566426	-4.98975	6.04574e-07	8.68228e-06
ENSG00000196810,5	NA	CTBP1 divergent transcript [Source:HGNC Symbol;Acc:HGNC:28307]	CTBP1-DT	144.446	0.445755	0.089377	4.98736	6.12112e-07	8.78414e-06
ENSG00000177239,15	11253	mannosidase alpha class 1B member 1 [Source:HGNC Symbol;Acc:HGNC:6823]	MAN1B1	658.622	-0.383714	0.0769424	-4.98703	6.13133e-07	8.79239e-06
ENSG00000136274,9	23148	NAC alpha domain containing [Source:HGNC Symbol;Acc:HGNC:22196]	NACAD	185.331	-0.565297	0.11339	-4.98541	6.18297e-07	8.86001e-06
ENSG00000155561,15	23165	nucleoporin 205 [Source:HGNC Symbol;Acc:HGNC:18658]	NUP205	1759.11	0.204841	0.0410906	4.98511	6.19252e-07	8.86725e-06
ENSG00000104490,18	83988	neurocalcin delta [Source:HGNC Symbol;Acc:HGNC:7655]	NCALD	749.752	-0.254948	0.0511772	-4.98167	6.30379e-07	9.02005e-06
ENSG00000139174,12	144165	prickle planar cell polarity protein 1 [Source:HGNC Symbol;Acc:HGNC:17019]	PRICKLE1	22.5067	-1.24713	0.250434	-4.97986	6.36295e-07	9.09809e-06
ENSG00000030582,18	2896	granulin precursor [Source:HGNC Symbol;Acc:HGNC:4601]	GRN	457.132	-0.610831	0.122671	-4.97942	6.37736e-07	9.1121e-06
ENSG00000143761,16	375	ADP ribosylation factor 1 [Source:HGNC Symbol;Acc:HGNC:652]	ARF1	1077.74	-0.328791	0.0660435	-4.9784	6.41125e-07	9.15389e-06
ENSG00000265354,4	100287932	translocase of inner mitochondrial membrane 23 [Source:HGNC Symbol;Acc:HGNC:17312]	TIMM23	260.4	0.341454	0.068639	4.97463	6.5373e-07	9.32711e-06
ENSG00000139354,11	283431	growth arrest specific 2 like 3 [Source:HGNC Symbol;Acc:HGNC:27475]	GAS2L3	470.208	0.320998	0.0645387	4.97373	6.56765e-07	9.36365e-06
ENSG00000127824,14	7277	tubulin alpha 4a [Source:HGNC Symbol;Acc:HGNC:12407]	TUBA4A	30.5078	-0.938573	0.188832	-4.97042	6.68075e-07	9.51801e-06
ENSG00000107438,9	9124	PDZ and LIM domain 1 [Source:HGNC Symbol;Acc:HGNC:2067]	PDLIM1	79.248	-0.594907	0.119751	-4.96786	6.76943e-07	9.6374e-06
ENSG00000136114,17	55901	thrombospondin type 1 domain containing 1 [Source:HGNC Symbol;Acc:HGNC:17754]	THSD1	225.907	-0.388538	0.0782149	-4.96757	6.77962e-07	9.64495e-06
ENSG00000146223,15	285855	ribosomal protein L7 like 1 [Source:HGNC Symbol;Acc:HGNC:21370]	RPL7L1	800.605	0.250246	0.0503782	4.96734	6.78775e-07	9.64956e-06
ENSG00000143126,8	1952	cadherin EGF LAG seven-pass G-type receptor 2 [Source:HGNC Symbol;Acc:HGNC:3231]	CELSR2	1756.85	-0.392779	0.0791241	-4.96408	6.90265e-07	9.80583e-06
ENSG00000130508,11	7837	peroxidasin [Source:HGNC Symbol;Acc:HGNC:14966]	PXDN	1139.61	0.248892	0.0501656	4.96141	6.99824e-07	9.93056e-06
ENSG00000235837,1	NA	novel transcript	AC073333,1	41.2088	0.765059	0.154204	4.96135	7.00051e-07	9.93056e-06
ENSG00000117305,15	3155	3-hydroxy-3-methylglutaryl-CoA lyase [Source:HGNC Symbol;Acc:HGNC:5005]	HMGCL	195.324	-0.415432	0.0838458	-4.95472	7.24342e-07	1.02678e-05
ENSG00000156876,10	163786	SAS-6 centriolar assembly protein [Source:HGNC Symbol;Acc:HGNC:25403]	SASS6	156.331	0.427246	0.0862445	4.95389	7.27438e-07	1.03042e-05
ENSG00000254682,1	NA	novel transcript	AP002387,2	48.3362	-0.807745	0.163116	-4.95198	7.34619e-07	1.03985e-05
ENSG00000152253,9	57405	SPC25 component of NDC80 kinetochore complex [Source:HGNC Symbol;Acc:HGNC:24031]	SPC25	222.805	0.317927	0.0642139	4.95107	7.38069e-07	1.04398e-05
ENSG00000041353,10	5874	RAB27B, member RAS oncogene family [Source:HGNC Symbol;Acc:HGNC:9767]	RAB27B	33.3982	0.955509	0.193051	4.94952	7.43977e-07	1.05083e-05
ENSG00000144655,15	64651	cysteine and serine rich nuclear protein 1 [Source:HGNC Symbol;Acc:HGNC:14300]	CSRNP1	125.094	-0.624933	0.12626	-4.94958	7.43757e-07	1.05083e-05
ENSG00000163166,15	55677	interacts with SUPT6H, CTD assembly factor 1 [Source:HGNC Symbol;Acc:HGNC:25467]	IWS1	337.353	0.275425	0.0556548	4.94882	7.46664e-07	1.05387e-05
ENSG00000131115,16	7770	zinc finger protein 227 [Source:HGNC Symbol;Acc:HGNC:13020]	ZNF227	225.381	0.40656	0.0821721	4.94767	7.51071e-07	1.05934e-05
ENSG00000122642,11	11328	FKBP prolyl isomerase 9 [Source:HGNC Symbol;Acc:HGNC:3725]	FKBP9	1333.04	-0.181358	0.03666	-4.94702	7.5358e-07	1.06212e-05
ENSG00000104870,13	2217	Fc fragment of IgG receptor and transporter [Source:HGNC Symbol;Acc:HGNC:3621]	FCGRT	182.394	-0.593984	0.12013	-4.94452	7.63331e-07	1.07509e-05
ENSG00000033627,16	535	ATPase H+ transporting V0 subunit a1 [Source:HGNC Symbol;Acc:HGNC:865]	ATP6V0A1	531.987	-0.265393	0.0536971	-4.94241	7.71629e-07	1.086e-05
ENSG00000127337,7	8089	YEATS domain containing 4 [Source:HGNC Symbol;Acc:HGNC:24859]	YEATS4	132.397	0.48696	0.0985763	4.93993	7.81489e-07	1.0991e-05
ENSG00000135709,12	9764	KIAA0513 [Source:HGNC Symbol;Acc:HGNC:29058]	KIAA0513	71.4063	-0.646794	0.130949	-4.93927	7.84161e-07	1.10207e-05
ENSG00000151692,15	9781	ring finger protein 144A [Source:HGNC Symbol;Acc:HGNC:20457]	RNF144A	297.912	-0.302476	0.0612569	-4.93783	7.89953e-07	1.10942e-05
ENSG00000070882,13	26031	oxysterol binding protein like 3 [Source:HGNC Symbol;Acc:HGNC:16370]	OSBPL3	796.163	0.265219	0.0537199	4.93707	7.93032e-07	1.11295e-05
ENSG00000184575,12	11260	exportin for tRNA [Source:HGNC Symbol;Acc:HGNC:12826]	XPOT	2297.97	0.309973	0.0627982	4.93601	7.97362e-07	1.11823e-05
ENSG00000171824,14	5394	exosome component 10 [Source:HGNC Symbol;Acc:HGNC:9138]	EXOSC10	462.113	0.250143	0.0506968	4.9341	8.05203e-07	1.12843e-05
ENSG00000107742,13	9806	SPARC (osteonectin), cwcv and kazal like domains proteoglycan 2 [Source:HGNC Symbol;Acc:HGNC:13564]	SPOCK2	77.2326	-0.711577	0.144275	-4.93208	8.13585e-07	1.13937e-05
ENSG00000115806,13	26003	golgi reassembly stacking protein 2 [Source:HGNC Symbol;Acc:HGNC:17500]	GORASP2	523.997	0.268189	0.0543788	4.93186	8.14499e-07	1.13984e-05
ENSG00000112592,14	6908	TATA-box binding protein [Source:HGNC Symbol;Acc:HGNC:11588]	TBP	121.452	0.437452	0.0887089	4.93131	8.16785e-07	1.14223e-05
ENSG00000152455,16	79723	suppressor of variegation 3-9 homolog 2 [Source:HGNC Symbol;Acc:HGNC:17287]	SUV39H2	273.638	0.323609	0.065649	4.92939	8.24883e-07	1.15225e-05
ENSG00000164125,15	51313	golgi associated kinase 1B [Source:HGNC Symbol;Acc:HGNC:25312]	GASK1B	7.14653	-2.44962	0.496947	-4.92933	8.25123e-07	1.15225e-05
ENSG00000155099,8	55529	phosphatidylinositol-4,5-bisphosphate 4-phosphatase 2 [Source:HGNC Symbol;Acc:HGNC:25452]	PIP4P2	188.241	-0.401815	0.081549	-4.92728	8.33802e-07	1.16355e-05
ENSG00000163882,9	5437	RNA polymerase II subunit H [Source:HGNC Symbol;Acc:HGNC:9195]	POLR2H	362.777	0.307545	0.0624229	4.9268	8.35869e-07	1.16561e-05
ENSG00000171603,17	22883	calsyntenin 1 [Source:HGNC Symbol;Acc:HGNC:17447]	CLSTN1	894.6	-0.310415	0.0630094	-4.92648	8.37222e-07	1.16667e-05
ENSG00000134222,16	84722	proline and serine rich coiled-coil 1 [Source:HGNC Symbol;Acc:HGNC:24472]	PSRC1	644.022	-0.195299	0.0396669	-4.92348	8.50188e-07	1.1839e-05
ENSG00000083093,9	79728	partner and localizer of BRCA2 [Source:HGNC Symbol;Acc:HGNC:26144]	PALB2	213.229	0.352734	0.0716912	4.92019	8.64602e-07	1.20276e-05
ENSG00000244005,13	9054	NFS1 cysteine desulfurase [Source:HGNC Symbol;Acc:HGNC:15910]	NFS1	157.028	0.396717	0.0806318	4.92011	8.6495e-07	1.20276e-05
ENSG00000185278,15	84614	zinc finger and BTB domain containing 37 [Source:HGNC Symbol;Acc:HGNC:28365]	ZBTB37	310.195	0.370163	0.0752399	4.91977	8.66455e-07	1.20401e-05
ENSG00000122545,20	989	septin 7 [Source:HGNC Symbol;Acc:HGNC:1717]	SEPTIN7	3926.09	0.346484	0.0704432	4.91863	8.71531e-07	1.21021e-05
ENSG00000159461,15	267	autocrine motility factor receptor [Source:HGNC Symbol;Acc:HGNC:463]	AMFR	632.3	-0.22651	0.046053	-4.91848	8.72208e-07	1.2103e-05
ENSG00000144815,16	91775	neurexophilin and PC-esterase domain family member 3 [Source:HGNC Symbol;Acc:HGNC:28238]	NXPE3	292.488	-0.312681	0.0635816	-4.9178	8.75218e-07	1.21362e-05
ENSG00000104998,4	9466	interleukin 27 receptor subunit alpha [Source:HGNC Symbol;Acc:HGNC:17290]	IL27RA	67.6706	-0.697029	0.141758	-4.91702	8.78716e-07	1.21761e-05
ENSG00000064115,11	51768	transmembrane 7 superfamily member 3 [Source:HGNC Symbol;Acc:HGNC:23049]	TM7SF3	671.393	0.238783	0.0485731	4.91595	8.83513e-07	1.2234e-05
ENSG00000256043,3	1519	cathepsin O [Source:HGNC Symbol;Acc:HGNC:2542]	CTSO	40.8456	-0.852956	0.173513	-4.91581	8.84153e-07	1.22343e-05
ENSG00000163002,13	129401	nucleoporin 35 [Source:HGNC Symbol;Acc:HGNC:29797]	NUP35	178.379	0.369682	0.0752187	4.91475	8.88941e-07	1.22919e-05
ENSG00000267328,1	NA	novel transcript	AC002398,2	14.5826	-1.38357	0.281605	-4.91317	8.96173e-07	1.23833e-05
ENSG00000188811,14	387921	NHL repeat containing 3 [Source:HGNC Symbol;Acc:HGNC:33751]	NHLRC3	352.48	-0.344501	0.0701252	-4.91265	8.98529e-07	1.24071e-05
ENSG00000112320,12	55084	sine oculis binding protein homolog [Source:HGNC Symbol;Acc:HGNC:29256]	SOBP	333.98	0.276103	0.0562197	4.91115	9.05416e-07	1.24935e-05
ENSG00000168077,14	51435	scavenger receptor class A member 3 [Source:HGNC Symbol;Acc:HGNC:19000]	SCARA3	323.807	-0.407864	0.0830591	-4.91053	9.08321e-07	1.25248e-05
ENSG00000167004,13	2923	protein disulfide isomerase family A member 3 [Source:HGNC Symbol;Acc:HGNC:4606]	PDIA3	2160.85	-0.316056	0.0643693	-4.91004	9.10569e-07	1.2547e-05
ENSG00000177156,11	6888	transaldolase 1 [Source:HGNC Symbol;Acc:HGNC:11559]	TALDO1	427.268	-0.295272	0.0601426	-4.90953	9.12965e-07	1.25625e-05
ENSG00000198846,6	9760	thymocyte selection associated high mobility group box [Source:HGNC Symbol;Acc:HGNC:18988]	TOX	109.875	-0.570612	0.116224	-4.90959	9.12654e-07	1.25625e-05
ENSG00000049618,23	57492	AT-rich interaction domain 1B [Source:HGNC Symbol;Acc:HGNC:18040]	ARID1B	501.391	0.256349	0.0522364	4.90748	9.22556e-07	1.26856e-05
ENSG00000146676,10	5814	purine rich element binding protein B [Source:HGNC Symbol;Acc:HGNC:9702]	PURB	1895.04	0.336361	0.0685727	4.90517	9.33446e-07	1.28264e-05
ENSG00000164830,18	55074	oxidation resistance 1 [Source:HGNC Symbol;Acc:HGNC:15822]	OXR1	321.896	-0.473685	0.0965726	-4.90497	9.34428e-07	1.2831e-05
ENSG00000124228,14	55661	DEAD-box helicase 27 [Source:HGNC Symbol;Acc:HGNC:15837]	DDX27	595.994	0.227446	0.0463767	4.90433	9.37483e-07	1.2864e-05
ENSG00000049540,17	2006	elastin [Source:HGNC Symbol;Acc:HGNC:3327]	ELN	1583.47	-0.500525	0.102065	-4.90401	9.39019e-07	1.28761e-05
ENSG00000143549,21	7170	tropomyosin 3 [Source:HGNC Symbol;Acc:HGNC:12012]	TPM3	1795.41	0.204004	0.0416096	4.90281	9.44761e-07	1.29458e-05
ENSG00000189195,13	23285	BTB domain containing 8 [Source:HGNC Symbol;Acc:HGNC:21019]	BTBD8	14.6279	-1.70538	0.347852	-4.90261	9.457e-07	1.29497e-05
ENSG00000102221,14	9767	jade family PHD finger 3 [Source:HGNC Symbol;Acc:HGNC:22982]	JADE3	90.79	0.474713	0.0968326	4.90241	9.46671e-07	1.2954e-05
ENSG00000169122,11	90362	family with sequence similarity 110 member B [Source:HGNC Symbol;Acc:HGNC:28587]	FAM110B	73.0569	-0.586284	0.119599	-4.90207	9.48324e-07	1.29677e-05
ENSG00000105821,15	27000	DnaJ heat shock protein family (Hsp40) member C2 [Source:HGNC Symbol;Acc:HGNC:13192]	DNAJC2	391.597	0.338052	0.0689762	4.90099	9.53537e-07	1.30299e-05
ENSG00000090339,9	3383	intercellular adhesion molecule 1 [Source:HGNC Symbol;Acc:HGNC:5344]	ICAM1	23.3272	-1.06518	0.217432	-4.89891	9.6371e-07	1.31598e-05
ENSG00000183520,12	51118	UTP11 small subunit processome component [Source:HGNC Symbol;Acc:HGNC:24329]	UTP11	352.927	0.336047	0.0685985	4.89875	9.64501e-07	1.31615e-05
ENSG00000102172,16	6611	spermine synthase [Source:HGNC Symbol;Acc:HGNC:11123]	SMS	440.044	0.348113	0.0710838	4.89722	9.72019e-07	1.32549e-05
ENSG00000236107,10	NA	SCN1A and SCN9A antisense RNA 1 [Source:HGNC Symbol;Acc:HGNC:54069]	SCN1A-AS1	10.5804	-1.46054	0.298299	-4.89625	9.76821e-07	1.33112e-05
ENSG00000124120,11	79183	alpha tocopherol transfer protein like [Source:HGNC Symbol;Acc:HGNC:16114]	TTPAL	369.349	0.264553	0.0540672	4.89304	9.92881e-07	1.35207e-05
ENSG00000233954,6	440567	ubiquinol-cytochrome c reductase hinge protein like [Source:HGNC Symbol;Acc:HGNC:51714]	UQCRHL	48.5177	0.71941	0.147095	4.89078	1.00435e-06	1.36674e-05
ENSG00000272047,2	404672	general transcription factor IIH subunit 5 [Source:HGNC Symbol;Acc:HGNC:21157]	GTF2H5	182.635	0.384906	0.0787206	4.88952	1.0108e-06	1.37458e-05
ENSG00000117600,12	9890	phospholipid phosphatase related 4 [Source:HGNC Symbol;Acc:HGNC:23496]	PLPPR4	168.563	0.432221	0.0884562	4.88627	1.02766e-06	1.39654e-05
ENSG00000068323,17	7030	transcription factor binding to IGHM enhancer 3 [Source:HGNC Symbol;Acc:HGNC:11752]	TFE3	242.545	-0.337422	0.069098	-4.88324	1.04359e-06	1.41707e-05
ENSG00000123933,17	10608	MAX dimerization protein 4 [Source:HGNC Symbol;Acc:HGNC:13906]	MXD4	107.715	-0.620956	0.127164	-4.88312	1.0442e-06	1.41707e-05
ENSG00000115241,11	5496	protein phosphatase, Mg2+/Mn2+ dependent 1G [Source:HGNC Symbol;Acc:HGNC:9278]	PPM1G	740.493	0.226983	0.0464904	4.88235	1.04827e-06	1.42162e-05
ENSG00000132763,15	25974	metabolism of cobalamin associated C [Source:HGNC Symbol;Acc:HGNC:24525]	MMACHC	257.761	0.300506	0.0615613	4.88141	1.0533e-06	1.42745e-05
ENSG00000101974,14	286410	ATPase phospholipid transporting 11C [Source:HGNC Symbol;Acc:HGNC:13554]	ATP11C	219.938	0.469781	0.0962782	4.87942	1.06399e-06	1.44095e-05
ENSG00000100097,12	3956	galectin 1 [Source:HGNC Symbol;Acc:HGNC:6561]	LGALS1	5252.92	-0.425876	0.0872904	-4.87884	1.0671e-06	1.44417e-05
ENSG00000009844,16	51534	vesicle trafficking 1 [Source:HGNC Symbol;Acc:HGNC:20954]	VTA1	634.347	0.315902	0.0647671	4.87751	1.07433e-06	1.45296e-05
ENSG00000257923,11	1523	cut like homeobox 1 [Source:HGNC Symbol;Acc:HGNC:2557]	CUX1	925.099	-0.209366	0.0429307	-4.87683	1.07806e-06	1.45701e-05
ENSG00000135316,18	10492	synaptotagmin binding cytoplasmic RNA interacting protein [Source:HGNC Symbol;Acc:HGNC:16918]	SYNCRIP	2297.96	0.310875	0.0637712	4.87486	1.08888e-06	1.47063e-05
ENSG00000114796,16	54800	kelch like family member 24 [Source:HGNC Symbol;Acc:HGNC:25947]	KLHL24	187.871	-0.429812	0.0881799	-4.87427	1.09213e-06	1.47401e-05
ENSG00000171316,12	55636	chromodomain helicase DNA binding protein 7 [Source:HGNC Symbol;Acc:HGNC:20626]	CHD7	757.516	0.254849	0.0522971	4.8731	1.09861e-06	1.48173e-05
ENSG00000138696,11	658	bone morphogenetic protein receptor type 1B [Source:HGNC Symbol;Acc:HGNC:1077]	BMPR1B	23.7773	0.826622	0.169653	4.87242	1.10241e-06	1.48584e-05
ENSG00000090006,17	8425	latent transforming growth factor beta binding protein 4 [Source:HGNC Symbol;Acc:HGNC:6717]	LTBP4	218.619	-1.1358	0.233129	-4.87201	1.1047e-06	1.48791e-05
ENSG00000113580,15	2908	nuclear receptor subfamily 3 group C member 1 [Source:HGNC Symbol;Acc:HGNC:7978]	NR3C1	769.057	-0.291395	0.0598522	-4.86857	1.12406e-06	1.51296e-05
ENSG00000150403,18	55002	transmembrane and coiled-coil domains 3 [Source:HGNC Symbol;Acc:HGNC:20329]	TMCO3	477.657	-0.245825	0.050504	-4.86744	1.13054e-06	1.52064e-05
ENSG00000204590,12	2794	G protein nucleolar 1 (putative) [Source:HGNC Symbol;Acc:HGNC:4413]	GNL1	765.871	0.197975	0.0406798	4.86667	1.13494e-06	1.52552e-05
ENSG00000214013,9	2595	glucosidase alpha, neutral C [Source:HGNC Symbol;Acc:HGNC:4139]	GANC	262.409	-0.337375	0.0694177	-4.86006	1.17347e-06	1.57624e-05
ENSG00000111052,7	8825	lin-7 homolog A, crumbs cell polarity complex component [Source:HGNC Symbol;Acc:HGNC:17787]	LIN7A	80.159	-0.723043	0.148782	-4.85976	1.17529e-06	1.5776e-05
ENSG00000142227,11	2014	epithelial membrane protein 3 [Source:HGNC Symbol;Acc:HGNC:3335]	EMP3	286.976	-0.360621	0.0742289	-4.85823	1.18439e-06	1.58874e-05
ENSG00000119720,18	55051	NRDE-2, necessary for RNA interference, domain containing [Source:HGNC Symbol;Acc:HGNC:20186]	NRDE2	502.889	0.265979	0.0547633	4.85689	1.19245e-06	1.59846e-05
ENSG00000160752,14	2224	farnesyl diphosphate synthase [Source:HGNC Symbol;Acc:HGNC:3631]	FDPS	1048.14	-0.247349	0.0509391	-4.85578	1.19913e-06	1.60633e-05
ENSG00000114353,17	2771	G protein subunit alpha i2 [Source:HGNC Symbol;Acc:HGNC:4385]	GNAI2	3686.8	-0.289274	0.0595903	-4.85438	1.20766e-06	1.61666e-05
ENSG00000173848,19	10276	neuroepithelial cell transforming 1 [Source:HGNC Symbol;Acc:HGNC:14592]	NET1	399.702	0.282177	0.0581377	4.8536	1.21243e-06	1.62194e-05
ENSG00000120889,13	8795	TNF receptor superfamily member 10b [Source:HGNC Symbol;Acc:HGNC:11905]	TNFRSF10B	67.8568	0.560807	0.115584	4.85196	1.2225e-06	1.63409e-05
ENSG00000138028,16	10669	cell growth regulator with EF-hand domain 1 [Source:HGNC Symbol;Acc:HGNC:16962]	CGREF1	106.814	-0.505472	0.104181	-4.85185	1.22317e-06	1.63409e-05
ENSG00000196247,11	51427	zinc finger protein 107 [Source:HGNC Symbol;Acc:HGNC:12887]	ZNF107	498.069	0.384754	0.0793043	4.85161	1.22462e-06	1.63492e-05
ENSG00000108679,13	3959	galectin 3 binding protein [Source:HGNC Symbol;Acc:HGNC:6564]	LGALS3BP	651.948	-0.541353	0.111589	-4.8513	1.22653e-06	1.63636e-05
ENSG00000122435,10	54482	tRNA methyltransferase 13 homolog [Source:HGNC Symbol;Acc:HGNC:25502]	TRMT13	204.373	0.451223	0.0930381	4.84987	1.23544e-06	1.64714e-05
ENSG00000221817,10	NA	PPP3CB antisense RNA 1 (head to head) [Source:HGNC Symbol;Acc:HGNC:50750]	PPP3CB-AS1	176.757	0.368648	0.0760215	4.84926	1.23921e-06	1.65106e-05
ENSG00000165507,9	11067	DEPP1 autophagy regulator [Source:HGNC Symbol;Acc:HGNC:23355]	DEPP1	41.7911	-0.763223	0.157529	-4.84498	1.26626e-06	1.68595e-05
ENSG00000165533,18	123016	tetratricopeptide repeat domain 8 [Source:HGNC Symbol;Acc:HGNC:20087]	TTC8	206.736	0.408752	0.084382	4.84407	1.27207e-06	1.69254e-05
ENSG00000102401,20	51566	armadillo repeat containing X-linked 3 [Source:HGNC Symbol;Acc:HGNC:24065]	ARMCX3	414.17	-0.302188	0.0623868	-4.84378	1.2739e-06	1.69335e-05
ENSG00000127980,16	5189	peroxisomal biogenesis factor 1 [Source:HGNC Symbol;Acc:HGNC:8850]	PEX1	494.557	0.305107	0.0629903	4.84371	1.27439e-06	1.69335e-05
ENSG00000272267,2	NA	novel transcript, antisense to TNKS	AC021242,3	102.542	-0.696207	0.14379	-4.84183	1.28649e-06	1.70828e-05
ENSG00000156299,13	7074	T cell lymphoma invasion and metastasis 1 [Source:HGNC Symbol;Acc:HGNC:11805]	TIAM1	124.208	0.476384	0.09841	4.84081	1.29313e-06	1.71594e-05
ENSG00000007237,18	8522	growth arrest specific 7 [Source:HGNC Symbol;Acc:HGNC:4169]	GAS7	1379.97	-0.207912	0.0429715	-4.83836	1.30913e-06	1.73601e-05
ENSG00000197008,9	7697	zinc finger protein 138 [Source:HGNC Symbol;Acc:HGNC:12922]	ZNF138	169.8	0.460386	0.0951616	4.83793	1.31196e-06	1.73858e-05
ENSG00000167100,14	201191	sterile alpha motif domain containing 14 [Source:HGNC Symbol;Acc:HGNC:27312]	SAMD14	69.8988	-0.595234	0.123069	-4.83659	1.32086e-06	1.74921e-05
ENSG00000130826,18	1736	dyskerin pseudouridine synthase 1 [Source:HGNC Symbol;Acc:HGNC:2890]	DKC1	563.979	0.240368	0.0496994	4.83644	1.32184e-06	1.74934e-05
ENSG00000131242,18	84440	RAB11 family interacting protein 4 [Source:HGNC Symbol;Acc:HGNC:30267]	RAB11FIP4	39.4099	-0.812305	0.167998	-4.8352	1.33013e-06	1.75912e-05
ENSG00000091129,20	4897	neuronal cell adhesion molecule [Source:HGNC Symbol;Acc:HGNC:7994]	NRCAM	1741.4	-0.273317	0.0565349	-4.83448	1.33494e-06	1.7643e-05
ENSG00000183798,5	90187	elastin microfibril interfacer 3 [Source:HGNC Symbol;Acc:HGNC:16123]	EMILIN3	64.1532	-0.717941	0.148546	-4.83312	1.34408e-06	1.77519e-05
ENSG00000137337,15	9656	mediator of DNA damage checkpoint 1 [Source:HGNC Symbol;Acc:HGNC:21163]	MDC1	594.457	0.224876	0.0465298	4.83294	1.34531e-06	1.77563e-05
ENSG00000105355,9	10226	perilipin 3 [Source:HGNC Symbol;Acc:HGNC:16893]	PLIN3	404.123	-0.475531	0.0984374	-4.8308	1.35988e-06	1.79366e-05
ENSG00000196361,10	1995	ELAV like RNA binding protein 3 [Source:HGNC Symbol;Acc:HGNC:3314]	ELAVL3	434.1	-0.377449	0.0781607	-4.82914	1.37126e-06	1.80746e-05
ENSG00000135414,10	10220	growth differentiation factor 11 [Source:HGNC Symbol;Acc:HGNC:4216]	GDF11	234.201	0.335877	0.0695823	4.82705	1.3857e-06	1.82528e-05
ENSG00000287158,1	NA	novel transcript	AC117464,1	12.0329	-1.33082	0.275743	-4.82631	1.39083e-06	1.83082e-05
ENSG00000197694,16	6709	spectrin alpha, non-erythrocytic 1 [Source:HGNC Symbol;Acc:HGNC:11273]	SPTAN1	2960.45	-0.195023	0.0404174	-4.82521	1.39854e-06	1.83974e-05
ENSG00000160445,11	10444	zyg-11 related cell cycle regulator [Source:HGNC Symbol;Acc:HGNC:30960]	ZER1	138.503	-0.495374	0.102689	-4.82404	1.40683e-06	1.8494e-05
ENSG00000225190,11	9842	pleckstrin homology and RUN domain containing M1 [Source:HGNC Symbol;Acc:HGNC:29017]	PLEKHM1	98.9165	-0.54153	0.112282	-4.82295	1.4145e-06	1.85825e-05
ENSG00000214357,9	54492	neuralized E3 ubiquitin protein ligase 1B [Source:HGNC Symbol;Acc:HGNC:35422]	NEURL1B	504.653	-0.287558	0.0596248	-4.8228	1.41556e-06	1.85841e-05
ENSG00000173588,15	51134	centrosomal protein 83 [Source:HGNC Symbol;Acc:HGNC:17966]	CEP83	123.034	0.459895	0.0954034	4.82053	1.4318e-06	1.87723e-05
ENSG00000286670,1	NA	novel transcript, antisense to VLDLR	AL450467,1	57.104	-0.752087	0.156015	-4.82062	1.43116e-06	1.87723e-05
ENSG00000073921,18	8301	phosphatidylinositol binding clathrin assembly protein [Source:HGNC Symbol;Acc:HGNC:15514]	PICALM	944.212	0.220478	0.0457409	4.82015	1.43453e-06	1.87955e-05
ENSG00000151657,12	22944	Kin17 DNA and RNA binding protein [Source:HGNC Symbol;Acc:HGNC:6327]	KIN	158.145	0.430883	0.0894047	4.81947	1.4394e-06	1.88469e-05
ENSG00000103187,8	23406	coactosin like F-actin binding protein 1 [Source:HGNC Symbol;Acc:HGNC:18304]	COTL1	346.16	-0.385262	0.0799438	-4.81916	1.44162e-06	1.88635e-05
ENSG00000163686,15	57406	abhydrolase domain containing 6 [Source:HGNC Symbol;Acc:HGNC:21398]	ABHD6	103.141	-0.467919	0.0971419	-4.81686	1.45836e-06	1.90571e-05
ENSG00000213281,5	4893	NRAS proto-oncogene, GTPase [Source:HGNC Symbol;Acc:HGNC:7989]	NRAS	1022.66	0.308003	0.0639419	4.81692	1.45795e-06	1.90571e-05
ENSG00000187764,11	10507	semaphorin 4D [Source:HGNC Symbol;Acc:HGNC:10732]	SEMA4D	93.2456	-0.576431	0.119679	-4.81646	1.46131e-06	1.9083e-05
ENSG00000124795,17	7913	DEK proto-oncogene [Source:HGNC Symbol;Acc:HGNC:2768]	DEK	1887.77	0.351655	0.0731042	4.81033	1.50683e-06	1.96646e-05
ENSG00000149262,17	92105	integrator complex subunit 4 [Source:HGNC Symbol;Acc:HGNC:25048]	INTS4	200.824	0.334582	0.0695765	4.80884	1.51812e-06	1.97867e-05
ENSG00000181577,16	NA	chromosome 6 open reading frame 223 [Source:HGNC Symbol;Acc:HGNC:28692]	C6orf223	26.4317	-1.09758	0.228242	-4.80883	1.5182e-06	1.97867e-05
ENSG00000081377,17	8555	cell division cycle 14B [Source:HGNC Symbol;Acc:HGNC:1719]	CDC14B	135.661	-0.414529	0.0862458	-4.80637	1.53699e-06	2.00184e-05
ENSG00000177301,15	3737	potassium voltage-gated channel subfamily A member 2 [Source:HGNC Symbol;Acc:HGNC:6220]	KCNA2	1233.78	0.21376	0.0444798	4.80577	1.54155e-06	2.00645e-05
ENSG00000128346,11	84645	chromosome 22 open reading frame 23 [Source:HGNC Symbol;Acc:HGNC:18589]	C22orf23	86.4181	-0.51868	0.107932	-4.80561	1.5428e-06	2.00675e-05
ENSG00000105220,17	2821	glucose-6-phosphate isomerase [Source:HGNC Symbol;Acc:HGNC:4458]	GPI	1728.7	-0.208357	0.0433619	-4.80506	1.54704e-06	2.01095e-05
ENSG00000112308,13	81688	chromosome 6 open reading frame 62 [Source:HGNC Symbol;Acc:HGNC:20998]	C6orf62	882.148	0.292776	0.0609722	4.80179	1.5725e-06	2.0427e-05
ENSG00000005249,13	5577	protein kinase cAMP-dependent type II regulatory subunit beta [Source:HGNC Symbol;Acc:HGNC:9392]	PRKAR2B	105.191	-0.479992	0.099975	-4.80112	1.57778e-06	2.04821e-05
ENSG00000120253,14	348995	nucleoporin 43 [Source:HGNC Symbol;Acc:HGNC:21182]	NUP43	550.487	0.228343	0.0475793	4.79922	1.59288e-06	2.06645e-05
ENSG00000102699,6	143	poly(ADP-ribose) polymerase family member 4 [Source:HGNC Symbol;Acc:HGNC:271]	PARP4	780.574	-0.26669	0.0555741	-4.79882	1.59606e-06	2.06921e-05
ENSG00000088325,16	22974	TPX2 microtubule nucleation factor [Source:HGNC Symbol;Acc:HGNC:1249]	TPX2	2588.03	0.212163	0.0442179	4.79813	1.60154e-06	2.07496e-05
ENSG00000106415,13	113263	glucocorticoid induced 1 [Source:HGNC Symbol;Acc:HGNC:18713]	GLCCI1	310.078	0.322759	0.0672729	4.79775	1.60458e-06	2.07754e-05
ENSG00000141232,5	10140	transducer of ERBB2, 1 [Source:HGNC Symbol;Acc:HGNC:11979]	TOB1	257.858	-0.353807	0.0737483	-4.7975	1.60659e-06	2.07877e-05
ENSG00000128710,5	3236	homeobox D10 [Source:HGNC Symbol;Acc:HGNC:5133]	HOXD10	308.541	0.32173	0.0670832	4.79598	1.61882e-06	2.09322e-05
ENSG00000286302,1	NA	novel transcript, antisense to NEK1	AC084724,1	4.18107	3.28193	0.684361	4.79561	1.6218e-06	2.0957e-05
ENSG00000204356,14	7936	negative elongation factor complex member E [Source:HGNC Symbol;Acc:HGNC:13974]	NELFE	488.333	0.317088	0.0661301	4.79491	1.62744e-06	2.10162e-05
ENSG00000124641,16	9477	mediator complex subunit 20 [Source:HGNC Symbol;Acc:HGNC:16840]	MED20	171.527	0.339448	0.0708054	4.7941	1.63405e-06	2.10876e-05
ENSG00000169217,9	10421	CD2 cytoplasmic tail binding protein 2 [Source:HGNC Symbol;Acc:HGNC:1656]	CD2BP2	950.454	0.212031	0.044233	4.79351	1.63889e-06	2.11363e-05
ENSG00000100243,21	1727	cytochrome b5 reductase 3 [Source:HGNC Symbol;Acc:HGNC:2873]	CYB5R3	785.104	-0.461667	0.0963393	-4.79209	1.65052e-06	2.12724e-05
ENSG00000168268,11	64943	5'-nucleotidase domain containing 2 [Source:HGNC Symbol;Acc:HGNC:25717]	NT5DC2	2173.97	-0.290087	0.0605886	-4.78781	1.68614e-06	2.17173e-05
ENSG00000005882,12	5164	pyruvate dehydrogenase kinase 2 [Source:HGNC Symbol;Acc:HGNC:8810]	PDK2	116.921	-0.483785	0.101104	-4.78503	1.70962e-06	2.20054e-05
ENSG00000136938,9	10541	acidic nuclear phosphoprotein 32 family member B [Source:HGNC Symbol;Acc:HGNC:16677]	ANP32B	949.483	0.311943	0.0651968	4.78463	1.713e-06	2.20345e-05
ENSG00000151725,12	79682	centromere protein U [Source:HGNC Symbol;Acc:HGNC:21348]	CENPU	336.206	0.2959	0.0618722	4.78244	1.73182e-06	2.22621e-05
ENSG00000138646,9	51191	HECT and RLD domain containing E3 ubiquitin protein ligase 5 [Source:HGNC Symbol;Acc:HGNC:24368]	HERC5	58.2433	-0.535172	0.112018	-4.77755	1.77443e-06	2.2795e-05
ENSG00000173214,6	91749	major facilitator superfamily domain containing 4B [Source:HGNC Symbol;Acc:HGNC:21053]	MFSD4B	111.66	0.486483	0.101874	4.77534	1.79408e-06	2.30324e-05
ENSG00000113643,9	5917	arginyl-tRNA synthetase [Source:HGNC Symbol;Acc:HGNC:9870]	RARS	385.15	0.355155	0.0743788	4.77495	1.79752e-06	2.30616e-05
ENSG00000112972,15	3157	3-hydroxy-3-methylglutaryl-CoA synthase 1 [Source:HGNC Symbol;Acc:HGNC:5007]	HMGCS1	4961.22	-0.354545	0.0742742	-4.77346	1.81084e-06	2.32174e-05
ENSG00000116120,11	10056	phenylalanyl-tRNA synthetase subunit beta [Source:HGNC Symbol;Acc:HGNC:17800]	FARSB	655.328	0.271863	0.0569589	4.77296	1.81537e-06	2.32603e-05
ENSG00000261460,1	NA	novel transcript, antisense to HEXA and CELF6	AC009690,2	308.823	-0.321526	0.0673956	-4.77073	1.8356e-06	2.35043e-05
ENSG00000176868,2	NA	novel transcript, antisense to PRRC2B	AL358781,1	373.186	-0.264456	0.055438	-4.7703	1.83954e-06	2.35394e-05
ENSG00000004534,15	10180	RNA binding motif protein 6 [Source:HGNC Symbol;Acc:HGNC:9903]	RBM6	554.744	0.29641	0.0621442	4.76971	1.8449e-06	2.35775e-05
ENSG00000182324,6	3770	potassium voltage-gated channel subfamily J member 14 [Source:HGNC Symbol;Acc:HGNC:6260]	KCNJ14	33.5809	0.770524	0.161542	4.7698	1.8441e-06	2.35775e-05
ENSG00000166341,8	8642	dachsous cadherin-related 1 [Source:HGNC Symbol;Acc:HGNC:13681]	DCHS1	494.47	-0.374417	0.078515	-4.76873	1.85394e-06	2.36776e-05
ENSG00000132481,7	91107	tripartite motif containing 47 [Source:HGNC Symbol;Acc:HGNC:19020]	TRIM47	121.841	-0.655173	0.137424	-4.76753	1.86501e-06	2.38036e-05
ENSG00000186230,7	388567	zinc finger protein 749 [Source:HGNC Symbol;Acc:HGNC:32783]	ZNF749	99.4728	0.459145	0.0963156	4.76709	1.8691e-06	2.38404e-05
ENSG00000116717,13	1647	growth arrest and DNA damage inducible alpha [Source:HGNC Symbol;Acc:HGNC:4095]	GADD45A	357.979	-0.293842	0.0616641	-4.7652	1.8867e-06	2.40494e-05
ENSG00000071282,12	29995	LIM and cysteine rich domains 1 [Source:HGNC Symbol;Acc:HGNC:6633]	LMCD1	83.2285	0.521139	0.109386	4.76421	1.89592e-06	2.41513e-05
ENSG00000150753,12	22948	chaperonin containing TCP1 subunit 5 [Source:HGNC Symbol;Acc:HGNC:1618]	CCT5	2295.2	0.253189	0.0531849	4.76054	1.93078e-06	2.45795e-05
ENSG00000092201,10	11198	SPT16 homolog, facilitates chromatin remodeling subunit [Source:HGNC Symbol;Acc:HGNC:11465]	SUPT16H	2941.45	0.196023	0.0411945	4.75847	1.95065e-06	2.48164e-05
ENSG00000145349,17	817	calcium/calmodulin dependent protein kinase II delta [Source:HGNC Symbol;Acc:HGNC:1462]	CAMK2D	573.691	-0.273644	0.0575166	-4.75765	1.95857e-06	2.49011e-05
ENSG00000136715,18	79595	Sin3A associated protein 130 [Source:HGNC Symbol;Acc:HGNC:29813]	SAP130	313.491	0.28918	0.0607847	4.75745	1.96055e-06	2.49102e-05
ENSG00000147416,11	526	ATPase H+ transporting V1 subunit B2 [Source:HGNC Symbol;Acc:HGNC:854]	ATP6V1B2	1051	-0.250758	0.0527139	-4.75697	1.9652e-06	2.49533e-05
ENSG00000079482,13	4983	oligophrenin 1 [Source:HGNC Symbol;Acc:HGNC:8148]	OPHN1	207.864	0.399124	0.0839326	4.75529	1.98159e-06	2.51452e-05
ENSG00000197226,12	23061	TBC1 domain family member 9B [Source:HGNC Symbol;Acc:HGNC:29097]	TBC1D9B	745.261	-0.317536	0.0667889	-4.75432	1.99112e-06	2.52499e-05
ENSG00000133789,15	23075	switching B cell complex subunit SWAP70 [Source:HGNC Symbol;Acc:HGNC:17070]	SWAP70	171.991	0.379924	0.07992	4.75381	1.99624e-06	2.52985e-05
ENSG00000116991,10	57568	signal induced proliferation associated 1 like 2 [Source:HGNC Symbol;Acc:HGNC:23800]	SIPA1L2	469.026	-0.231981	0.0488061	-4.75312	2.00302e-06	2.53681e-05
ENSG00000116260,17	5768	quiescin sulfhydryl oxidase 1 [Source:HGNC Symbol;Acc:HGNC:9756]	QSOX1	321.181	-0.43818	0.0921935	-4.75283	2.00591e-06	2.53884e-05
ENSG00000165609,13	11164	nudix hydrolase 5 [Source:HGNC Symbol;Acc:HGNC:8052]	NUDT5	820.696	0.273753	0.0576069	4.75208	2.01331e-06	2.54658e-05
ENSG00000117461,15	8503	phosphoinositide-3-kinase regulatory subunit 3 [Source:HGNC Symbol;Acc:HGNC:8981]	PIK3R3	331.885	0.316557	0.0666446	4.74993	2.03488e-06	2.57221e-05
ENSG00000118181,11	6230	ribosomal protein S25 [Source:HGNC Symbol;Acc:HGNC:10413]	RPS25	1498.12	0.286402	0.06034	4.74648	2.06989e-06	2.61479e-05
ENSG00000013374,16	51667	negative regulator of ubiquitin like proteins 1 [Source:HGNC Symbol;Acc:HGNC:17623]	NUB1	491.047	0.287182	0.0605108	4.74595	2.07526e-06	2.6199e-05
ENSG00000170837,3	2850	G protein-coupled receptor 27 [Source:HGNC Symbol;Acc:HGNC:4482]	GPR27	11.6006	-1.6687	0.351626	-4.74566	2.07826e-06	2.62201e-05
ENSG00000181982,18	91050	coiled-coil domain containing 149 [Source:HGNC Symbol;Acc:HGNC:25405]	CCDC149	91.238	-0.458462	0.0966299	-4.74452	2.09003e-06	2.63517e-05
ENSG00000102763,18	23078	von Willebrand factor A domain containing 8 [Source:HGNC Symbol;Acc:HGNC:29071]	VWA8	233.869	-0.342726	0.07225	-4.74361	2.09943e-06	2.64534e-05
ENSG00000136271,10	54606	DEAD-box helicase 56 [Source:HGNC Symbol;Acc:HGNC:18193]	DDX56	724.644	0.254492	0.0536653	4.74222	2.11394e-06	2.66192e-05
ENSG00000204568,12	28973	mitochondrial ribosomal protein S18B [Source:HGNC Symbol;Acc:HGNC:14516]	MRPS18B	340.774	0.276622	0.0583382	4.74169	2.11945e-06	2.66716e-05
ENSG00000214944,9	64283	Rho guanine nucleotide exchange factor 28 [Source:HGNC Symbol;Acc:HGNC:30322]	ARHGEF28	145.828	-0.369015	0.0778325	-4.74114	2.1252e-06	2.67269e-05
ENSG00000189180,16	7581	zinc finger protein 33A [Source:HGNC Symbol;Acc:HGNC:13096]	ZNF33A	404.407	0.426996	0.090083	4.74003	2.13686e-06	2.68563e-05
ENSG00000085719,13	8895	copine 3 [Source:HGNC Symbol;Acc:HGNC:2316]	CPNE3	729.029	-0.287933	0.0607701	-4.73807	2.15762e-06	2.71e-05
ENSG00000136869,16	7099	toll like receptor 4 [Source:HGNC Symbol;Acc:HGNC:11850]	TLR4	4.82667	-4.24719	0.896443	-4.73783	2.16022e-06	2.71155e-05
ENSG00000163513,18	7048	transforming growth factor beta receptor 2 [Source:HGNC Symbol;Acc:HGNC:11773]	TGFBR2	166.745	0.404339	0.0853592	4.73691	2.17e-06	2.72036e-05
ENSG00000184481,17	4303	forkhead box O4 [Source:HGNC Symbol;Acc:HGNC:7139]	FOXO4	16.2536	-1.28728	0.271754	-4.73691	2.17e-06	2.72036e-05
ENSG00000099864,18	5064	paralemmin [Source:HGNC Symbol;Acc:HGNC:8594]	PALM	168.407	-0.702837	0.148447	-4.73461	2.19475e-06	2.74964e-05
ENSG00000287629,1	NA	novel transcript, antisense to ZBTB47	AC006059,5	74.5899	-0.484104	0.102255	-4.7343	2.19812e-06	2.75211e-05
ENSG00000196182,10	83931	serine/threonine kinase 40 [Source:HGNC Symbol;Acc:HGNC:21373]	STK40	348.029	-0.379102	0.0800788	-4.73412	2.20012e-06	2.75288e-05
ENSG00000151883,18	79668	poly(ADP-ribose) polymerase family member 8 [Source:HGNC Symbol;Acc:HGNC:26124]	PARP8	95.0566	-0.526581	0.111261	-4.73285	2.21385e-06	2.7683e-05
ENSG00000126878,13	83543	allograft inflammatory factor 1 like [Source:HGNC Symbol;Acc:HGNC:28904]	AIF1L	1095.57	-0.252863	0.0534306	-4.73255	2.2172e-06	2.77073e-05
ENSG00000018189,13	22902	RUN and FYVE domain containing 3 [Source:HGNC Symbol;Acc:HGNC:30285]	RUFY3	259.349	-0.394637	0.0834155	-4.73098	2.23443e-06	2.79049e-05
ENSG00000148730,7	1979	eukaryotic translation initiation factor 4E binding protein 2 [Source:HGNC Symbol;Acc:HGNC:3289]	EIF4EBP2	1494.8	0.240799	0.050907	4.73017	2.24327e-06	2.79976e-05
ENSG00000204580,13	780	discoidin domain receptor tyrosine kinase 1 [Source:HGNC Symbol;Acc:HGNC:2730]	DDR1	3620.79	-0.370505	0.0783706	-4.72759	2.27195e-06	2.83377e-05
ENSG00000090061,17	8812	cyclin K [Source:HGNC Symbol;Acc:HGNC:1596]	CCNK	416.751	0.274065	0.0579881	4.72623	2.2873e-06	2.8511e-05
ENSG00000177889,10	7334	ubiquitin conjugating enzyme E2 N [Source:HGNC Symbol;Acc:HGNC:12492]	UBE2N	760.304	0.285637	0.0604524	4.72499	2.3013e-06	2.86674e-05
ENSG00000072778,20	37	acyl-CoA dehydrogenase very long chain [Source:HGNC Symbol;Acc:HGNC:92]	ACADVL	724.74	0.266018	0.0563095	4.72421	2.31008e-06	2.87587e-05
ENSG00000181991,16	64963	mitochondrial ribosomal protein S11 [Source:HGNC Symbol;Acc:HGNC:14050]	MRPS11	198.173	-0.355323	0.0752175	-4.72395	2.31311e-06	2.87782e-05
ENSG00000106688,12	6505	solute carrier family 1 member 1 [Source:HGNC Symbol;Acc:HGNC:10939]	SLC1A1	59.7905	-0.653775	0.138453	-4.722	2.33539e-06	2.90371e-05
ENSG00000188001,10	285386	tumor protein p63 regulated 1 [Source:HGNC Symbol;Acc:HGNC:24759]	TPRG1	14.5743	1.28211	0.271567	4.72117	2.3449e-06	2.91371e-05
ENSG00000141295,14	90507	secernin 2 [Source:HGNC Symbol;Acc:HGNC:30381]	SCRN2	116.275	-0.642909	0.136239	-4.71897	2.37037e-06	2.94349e-05
ENSG00000137692,12	84259	defective in cullin neddylation 1 domain containing 5 [Source:HGNC Symbol;Acc:HGNC:28409]	DCUN1D5	138.902	0.432048	0.091579	4.71777	2.38448e-06	2.95915e-05
ENSG00000119865,8	25927	cannabinoid receptor interacting protein 1 [Source:HGNC Symbol;Acc:HGNC:24546]	CNRIP1	90.426	-0.54748	0.116125	-4.71459	2.42195e-06	3.00377e-05
ENSG00000084444,14	57613	family with sequence similarity 234 member B [Source:HGNC Symbol;Acc:HGNC:29288]	FAM234B	149.3	-0.490131	0.103983	-4.71357	2.43413e-06	3.01698e-05
ENSG00000105696,9	25789	transmembrane protein 59 like [Source:HGNC Symbol;Acc:HGNC:13237]	TMEM59L	51.1538	-0.82635	0.175362	-4.71224	2.4501e-06	3.03486e-05
ENSG00000240204,3	100287482	small lysine rich protein 1 [Source:HGNC Symbol;Acc:HGNC:43561]	SMKR1	16.3112	1.15661	0.245472	4.71178	2.45568e-06	3.03987e-05
ENSG00000176624,11	51320	mex-3 RNA binding family member C [Source:HGNC Symbol;Acc:HGNC:28040]	MEX3C	832.888	-0.244201	0.051834	-4.7112	2.46262e-06	3.04654e-05
ENSG00000123240,17	10133	optineurin [Source:HGNC Symbol;Acc:HGNC:17142]	OPTN	122.616	-0.504288	0.107045	-4.71101	2.46495e-06	3.04751e-05
ENSG00000076685,18	22978	5'-nucleotidase, cytosolic II [Source:HGNC Symbol;Acc:HGNC:8022]	NT5C2	274.93	0.314086	0.0666827	4.71016	2.47522e-06	3.0583e-05
ENSG00000119772,16	1788	DNA methyltransferase 3 alpha [Source:HGNC Symbol;Acc:HGNC:2978]	DNMT3A	258.13	-0.307352	0.0652784	-4.70832	2.49765e-06	3.08408e-05
ENSG00000183401,12	126075	coiled-coil domain containing 159 [Source:HGNC Symbol;Acc:HGNC:26996]	CCDC159	293.038	-0.390881	0.0831153	-4.70287	2.56526e-06	3.16559e-05
ENSG00000131089,16	23229	Cdc42 guanine nucleotide exchange factor 9 [Source:HGNC Symbol;Acc:HGNC:14561]	ARHGEF9	549.171	0.227308	0.0483399	4.70229	2.57258e-06	3.17263e-05
ENSG00000126012,11	8242	lysine demethylase 5C [Source:HGNC Symbol;Acc:HGNC:11114]	KDM5C	748.973	-0.29465	0.0626945	-4.69978	2.60448e-06	3.20997e-05
ENSG00000104833,12	10382	tubulin beta 4A class IVa [Source:HGNC Symbol;Acc:HGNC:20774]	TUBB4A	31.3704	-0.971099	0.206641	-4.69946	2.60851e-06	3.21293e-05
ENSG00000080573,7	50509	collagen type V alpha 3 chain [Source:HGNC Symbol;Acc:HGNC:14864]	COL5A3	108.72	0.694723	0.147841	4.69912	2.61289e-06	3.21632e-05
ENSG00000121454,6	89884	LIM homeobox 4 [Source:HGNC Symbol;Acc:HGNC:21734]	LHX4	55.7706	0.621354	0.132245	4.6985	2.6208e-06	3.22404e-05
ENSG00000134248,13	10542	late endosomal/lysosomal adaptor, MAPK and MTOR activator 5 [Source:HGNC Symbol;Acc:HGNC:17955]	LAMTOR5	359.102	0.310892	0.0661842	4.69737	2.63528e-06	3.23845e-05
ENSG00000140876,11	283927	nudix hydrolase 7 [Source:HGNC Symbol;Acc:HGNC:8054]	NUDT7	35.2075	-0.926403	0.197219	-4.69733	2.63579e-06	3.23845e-05
ENSG00000113555,5	51294	protocadherin 12 [Source:HGNC Symbol;Acc:HGNC:8657]	PCDH12	112.473	0.403719	0.0859589	4.69665	2.64457e-06	3.24721e-05
ENSG00000143669,13	1130	lysosomal trafficking regulator [Source:HGNC Symbol;Acc:HGNC:1968]	LYST	232.652	-0.368623	0.0786256	-4.68834	2.75431e-06	3.37985e-05
ENSG00000071553,17	537	ATPase H+ transporting accessory protein 1 [Source:HGNC Symbol;Acc:HGNC:868]	ATP6AP1	717.454	-0.289848	0.0618261	-4.68811	2.75735e-06	3.38148e-05
ENSG00000088280,19	55616	ArfGAP with SH3 domain, ankyrin repeat and PH domain 3 [Source:HGNC Symbol;Acc:HGNC:14987]	ASAP3	173.021	-0.356744	0.0761014	-4.68775	2.76222e-06	3.38535e-05
ENSG00000102384,13	2491	centromere protein I [Source:HGNC Symbol;Acc:HGNC:3968]	CENPI	167.039	0.345109	0.0736552	4.68547	2.79324e-06	3.42124e-05
ENSG00000047849,21	4134	microtubule associated protein 4 [Source:HGNC Symbol;Acc:HGNC:6862]	MAP4	3255.49	-0.204895	0.0437344	-4.68499	2.79975e-06	3.42604e-05
ENSG00000257553,1	NA	novel transcript, antisense to PA2G4	AC034102,4	186.601	0.383746	0.0819107	4.68492	2.80063e-06	3.42604e-05
ENSG00000181666,18	284459	zinc finger protein 875 [Source:HGNC Symbol;Acc:HGNC:4928]	ZNF875	398.518	0.244572	0.0522074	4.68462	2.80475e-06	3.42895e-05
ENSG00000162522,11	57648	KIAA1522 [Source:HGNC Symbol;Acc:HGNC:29301]	KIAA1522	51.3917	-0.660572	0.141029	-4.68395	2.81399e-06	3.43813e-05
ENSG00000134453,16	84991	RNA binding motif protein 17 [Source:HGNC Symbol;Acc:HGNC:16944]	RBM17	1037.35	0.229731	0.0490491	4.6837	2.81739e-06	3.44014e-05
ENSG00000146733,14	5723	phosphoserine phosphatase [Source:HGNC Symbol;Acc:HGNC:9577]	PSPH	568.381	0.26751	0.0571321	4.6823	2.83672e-06	3.4616e-05
ENSG00000172057,10	94103	ORMDL sphingolipid biosynthesis regulator 3 [Source:HGNC Symbol;Acc:HGNC:16038]	ORMDL3	283.592	-0.303034	0.064721	-4.68216	2.83868e-06	3.46186e-05
ENSG00000070182,21	6710	spectrin beta, erythrocytic [Source:HGNC Symbol;Acc:HGNC:11274]	SPTB	57.6526	0.719417	0.153668	4.68162	2.84619e-06	3.46887e-05
ENSG00000156709,14	9131	apoptosis inducing factor mitochondria associated 1 [Source:HGNC Symbol;Acc:HGNC:8768]	AIFM1	208.988	0.376023	0.0803309	4.68092	2.85584e-06	3.47848e-05
ENSG00000162493,16	10630	podoplanin [Source:HGNC Symbol;Acc:HGNC:29602]	PDPN	398.375	0.277179	0.0592269	4.67995	2.86946e-06	3.49292e-05
ENSG00000168439,16	10963	stress induced phosphoprotein 1 [Source:HGNC Symbol;Acc:HGNC:11387]	STIP1	1119.1	0.192719	0.0411816	4.67973	2.87252e-06	3.49449e-05
ENSG00000119900,9	79627	opioid growth factor receptor like 1 [Source:HGNC Symbol;Acc:HGNC:21378]	OGFRL1	365.72	0.397212	0.0848998	4.6786	2.88845e-06	3.5117e-05
ENSG00000145990,11	54438	glucose-fructose oxidoreductase domain containing 1 [Source:HGNC Symbol;Acc:HGNC:21096]	GFOD1	22.2307	0.961488	0.205518	4.67837	2.89162e-06	3.51339e-05
ENSG00000099954,18	27443	CECR2 histone acetyl-lysine reader [Source:HGNC Symbol;Acc:HGNC:1840]	CECR2	119.784	0.36809	0.078697	4.6773	2.90671e-06	3.52955e-05
ENSG00000166689,16	144100	pleckstrin homology domain containing A7 [Source:HGNC Symbol;Acc:HGNC:27049]	PLEKHA7	22.1403	1.04255	0.222937	4.67642	2.91922e-06	3.54256e-05
ENSG00000172409,6	10978	cleavage and polyadenylation factor I subunit 1 [Source:HGNC Symbol;Acc:HGNC:16999]	CLP1	73.4095	0.483536	0.103405	4.67615	2.92309e-06	3.54507e-05
ENSG00000065883,16	8621	cyclin dependent kinase 13 [Source:HGNC Symbol;Acc:HGNC:1733]	CDK13	673.267	0.259049	0.0554145	4.67474	2.94322e-06	3.5673e-05
ENSG00000100592,15	23002	dishevelled associated activator of morphogenesis 1 [Source:HGNC Symbol;Acc:HGNC:18142]	DAAM1	626.421	0.302441	0.0647004	4.67448	2.947e-06	3.56839e-05
ENSG00000124496,12	55809	transcriptional regulating factor 1 [Source:HGNC Symbol;Acc:HGNC:18273]	TRERF1	86.5924	-0.490809	0.104999	-4.67443	2.94774e-06	3.56839e-05
ENSG00000101104,12	80336	poly(A) binding protein cytoplasmic 1 like [Source:HGNC Symbol;Acc:HGNC:15797]	PABPC1L	439.63	0.491277	0.105148	4.67226	2.9791e-06	3.60415e-05
ENSG00000174007,8	84984	centrosomal protein 19 [Source:HGNC Symbol;Acc:HGNC:28209]	CEP19	52.721	0.632266	0.13534	4.67167	2.98754e-06	3.61214e-05
ENSG00000006625,18	79017	gamma-glutamylcyclotransferase [Source:HGNC Symbol;Acc:HGNC:21705]	GGCT	257.819	0.291382	0.0623817	4.67095	2.9981e-06	3.62269e-05
ENSG00000031698,13	6301	seryl-tRNA synthetase [Source:HGNC Symbol;Acc:HGNC:10537]	SARS	1628.74	0.272901	0.0584342	4.67023	3.0086e-06	3.63315e-05
ENSG00000180228,13	8575	protein activator of interferon induced protein kinase EIF2AK2 [Source:HGNC Symbol;Acc:HGNC:9438]	PRKRA	267.521	0.336239	0.0720007	4.66994	3.01295e-06	3.63618e-05
ENSG00000125648,15	79085	solute carrier family 25 member 23 [Source:HGNC Symbol;Acc:HGNC:19375]	SLC25A23	332.499	-0.315896	0.0676577	-4.66904	3.02606e-06	3.64977e-05
ENSG00000155438,12	84365	nucleolar protein interacting with the FHA domain of MKI67 [Source:HGNC Symbol;Acc:HGNC:17838]	NIFK	332.01	0.355138	0.0761177	4.66564	3.07659e-06	3.70845e-05
ENSG00000145390,11	54532	ubiquitin specific peptidase 53 [Source:HGNC Symbol;Acc:HGNC:29255]	USP53	170.811	-0.57055	0.122297	-4.66526	3.08223e-06	3.71298e-05
ENSG00000128989,10	10776	cAMP regulated phosphoprotein 19 [Source:HGNC Symbol;Acc:HGNC:16967]	ARPP19	2893.24	-0.301649	0.0646782	-4.66384	3.10369e-06	3.73655e-05
ENSG00000183044,12	18	4-aminobutyrate aminotransferase [Source:HGNC Symbol;Acc:HGNC:23]	ABAT	345.727	-0.279233	0.0599265	-4.65959	3.16847e-06	3.81221e-05
ENSG00000124587,14	5190	peroxisomal biogenesis factor 6 [Source:HGNC Symbol;Acc:HGNC:8859]	PEX6	186.312	0.405023	0.0869532	4.65794	3.19386e-06	3.84042e-05
ENSG00000247473,2	NA	CARS antisense RNA 1 [Source:HGNC Symbol;Acc:HGNC:40125]	CARS-AS1	76.8732	0.583631	0.125309	4.65755	3.19997e-06	3.84542e-05
ENSG00000151929,9	9531	BCL2 associated athanogene 3 [Source:HGNC Symbol;Acc:HGNC:939]	BAG3	154.528	-0.405623	0.0871171	-4.65606	3.22311e-06	3.87087e-05
ENSG00000006634,8	10926	DBF4 zinc finger [Source:HGNC Symbol;Acc:HGNC:17364]	DBF4	444.056	0.336428	0.072293	4.65367	3.26081e-06	3.91376e-05
ENSG00000105176,18	8725	URI1 prefoldin like chaperone [Source:HGNC Symbol;Acc:HGNC:13236]	URI1	731.084	0.307718	0.0661555	4.65144	3.29619e-06	3.95143e-05
ENSG00000110108,10	79073	transmembrane protein 109 [Source:HGNC Symbol;Acc:HGNC:28771]	TMEM109	232.534	0.378359	0.0813407	4.65153	3.29475e-06	3.95143e-05
ENSG00000166839,17	348094	ankyrin repeat and death domain containing 1A [Source:HGNC Symbol;Acc:HGNC:28002]	ANKDD1A	86.3238	-0.529638	0.113882	-4.65076	3.30718e-06	3.96219e-05
ENSG00000196290,15	60491	NGG1 interacting factor 3 like 1 [Source:HGNC Symbol;Acc:HGNC:13390]	NIF3L1	210.091	0.355172	0.0763957	4.6491	3.33379e-06	3.99164e-05
ENSG00000123159,16	10755	GIPC PDZ domain containing family member 1 [Source:HGNC Symbol;Acc:HGNC:1226]	GIPC1	263.937	-0.565966	0.121741	-4.64894	3.33647e-06	3.99244e-05
ENSG00000130396,20	4301	afadin, adherens junction formation factor [Source:HGNC Symbol;Acc:HGNC:7137]	AFDN	1492.61	0.199019	0.04282	4.6478	3.3549e-06	4.01205e-05
ENSG00000094804,12	990	cell division cycle 6 [Source:HGNC Symbol;Acc:HGNC:1744]	CDC6	391.432	0.238051	0.051233	4.64644	3.37712e-06	4.03618e-05
ENSG00000100526,20	1033	cyclin dependent kinase inhibitor 3 [Source:HGNC Symbol;Acc:HGNC:1791]	CDKN3	465.482	0.293881	0.0632602	4.64558	3.39115e-06	4.0505e-05
ENSG00000102882,12	5595	mitogen-activated protein kinase 3 [Source:HGNC Symbol;Acc:HGNC:6877]	MAPK3	437.78	-0.297949	0.0641634	-4.6436	3.42387e-06	4.0871e-05
ENSG00000073792,15	10644	insulin like growth factor 2 mRNA binding protein 2 [Source:HGNC Symbol;Acc:HGNC:28867]	IGF2BP2	310.976	-0.27198	0.0585811	-4.6428	3.43727e-06	4.10062e-05
ENSG00000023697,13	51071	deoxyribose-phosphate aldolase [Source:HGNC Symbol;Acc:HGNC:24269]	DERA	231.478	0.344314	0.0742302	4.63846	3.51007e-06	4.18493e-05
ENSG00000075275,16	9620	cadherin EGF LAG seven-pass G-type receptor 1 [Source:HGNC Symbol;Acc:HGNC:1850]	CELSR1	739.711	-0.455836	0.0982847	-4.63791	3.51944e-06	4.19358e-05
ENSG00000197879,17	4641	myosin IC [Source:HGNC Symbol;Acc:HGNC:7597]	MYO1C	232.275	0.414092	0.0892885	4.63768	3.52334e-06	4.19568e-05
ENSG00000113460,13	55299	biogenesis of ribosomes BRX1 [Source:HGNC Symbol;Acc:HGNC:24170]	BRIX1	307.486	0.346304	0.0746785	4.63727	3.5304e-06	4.1995e-05
ENSG00000198561,13	1500	catenin delta 1 [Source:HGNC Symbol;Acc:HGNC:2515]	CTNND1	1287.78	0.193202	0.041663	4.63725	3.5308e-06	4.1995e-05
ENSG00000172059,11	8462	Kruppel like factor 11 [Source:HGNC Symbol;Acc:HGNC:11811]	KLF11	72.7491	0.530285	0.114357	4.63711	3.53322e-06	4.19985e-05
ENSG00000135457,10	7024	transcription factor CP2 [Source:HGNC Symbol;Acc:HGNC:11748]	TFCP2	514.333	0.231484	0.049924	4.63673	3.5397e-06	4.20502e-05
ENSG00000113369,9	57561	arrestin domain containing 3 [Source:HGNC Symbol;Acc:HGNC:29263]	ARRDC3	1521.44	-0.306635	0.0661636	-4.6345	3.57794e-06	4.24789e-05
ENSG00000153395,10	79888	lysophosphatidylcholine acyltransferase 1 [Source:HGNC Symbol;Acc:HGNC:25718]	LPCAT1	283.807	-0.312399	0.0674125	-4.63414	3.58422e-06	4.25278e-05
ENSG00000180626,10	84622	zinc finger protein 594 [Source:HGNC Symbol;Acc:HGNC:29392]	ZNF594	162.487	0.397383	0.0857699	4.63313	3.60186e-06	4.27115e-05
ENSG00000150907,9	2308	forkhead box O1 [Source:HGNC Symbol;Acc:HGNC:3819]	FOXO1	214.463	-0.352764	0.0761768	-4.63086	3.64143e-06	4.31363e-05
ENSG00000180190,11	157695	testis development related protein [Source:HGNC Symbol;Acc:HGNC:26951]	TDRP	67.7266	-0.645658	0.139426	-4.63083	3.64206e-06	4.31363e-05
ENSG00000204655,12	4340	myelin oligodendrocyte glycoprotein [Source:HGNC Symbol;Acc:HGNC:7197]	MOG	1.99953	3.74468	0.809206	4.6276	3.69935e-06	4.37886e-05
ENSG00000104133,15	80208	SPG11 vesicle trafficking associated, spatacsin [Source:HGNC Symbol;Acc:HGNC:11226]	SPG11	767.2	-0.215316	0.0465385	-4.62662	3.71687e-06	4.39652e-05
ENSG00000150687,12	11098	serine protease 23 [Source:HGNC Symbol;Acc:HGNC:14370]	PRSS23	44.1276	-0.771674	0.166794	-4.62651	3.71873e-06	4.39652e-05
ENSG00000166004,15	85459	centrosomal protein 295 [Source:HGNC Symbol;Acc:HGNC:29366]	CEP295	445.885	0.300418	0.0650013	4.62173	3.80547e-06	4.49638e-05
ENSG00000136045,12	11137	PWP1 homolog, endonuclein [Source:HGNC Symbol;Acc:HGNC:17015]	PWP1	464.497	0.264649	0.057279	4.62036	3.83072e-06	4.52351e-05
ENSG00000122694,16	152007	GLI pathogenesis related 2 [Source:HGNC Symbol;Acc:HGNC:18007]	GLIPR2	188.091	-0.333763	0.0722496	-4.61957	3.84527e-06	4.53797e-05
ENSG00000145996,11	54901	CDK5 regulatory subunit associated protein 1 like 1 [Source:HGNC Symbol;Acc:HGNC:21050]	CDKAL1	130.107	0.397995	0.0861668	4.61889	3.8579e-06	4.55015e-05
ENSG00000024048,10	23304	ubiquitin protein ligase E3 component n-recognin 2 [Source:HGNC Symbol;Acc:HGNC:21289]	UBR2	393.952	0.269849	0.0584637	4.61566	3.9184e-06	4.61875e-05
ENSG00000180818,5	3226	homeobox C10 [Source:HGNC Symbol;Acc:HGNC:5122]	HOXC10	137.03	0.396776	0.0859654	4.61554	3.92083e-06	4.61886e-05
ENSG00000161013,17	11282	alpha-1,3-mannosyl-glycoprotein 4-beta-N-acetylglucosaminyltransferase B [Source:HGNC Symbol;Acc:HGNC:7048]	MGAT4B	301.054	-0.333871	0.0723719	-4.61326	3.964e-06	4.66692e-05
ENSG00000178401,16	79962	DnaJ heat shock protein family (Hsp40) member C22 [Source:HGNC Symbol;Acc:HGNC:25802]	DNAJC22	217.736	0.31201	0.0676439	4.61253	3.97791e-06	4.68051e-05
ENSG00000232677,8	NA	long intergenic non-protein coding RNA 665 [Source:HGNC Symbol;Acc:HGNC:44323]	LINC00665	298.961	0.270543	0.0586899	4.60971	4.03227e-06	4.74164e-05
ENSG00000006194,10	10127	zinc finger protein 263 [Source:HGNC Symbol;Acc:HGNC:13056]	ZNF263	452.026	0.257756	0.0559236	4.60907	4.04473e-06	4.75346e-05
ENSG00000162384,14	54987	CXXC motif containing zinc binding protein [Source:HGNC Symbol;Acc:HGNC:26059]	CZIB	264.97	0.31904	0.0692515	4.60698	4.08554e-06	4.79856e-05
ENSG00000198053,11	140885	signal regulatory protein alpha [Source:HGNC Symbol;Acc:HGNC:9662]	SIRPA	240.05	-0.314161	0.0681955	-4.60678	4.08961e-06	4.80048e-05
ENSG00000204227,5	6015	ring finger protein 1 [Source:HGNC Symbol;Acc:HGNC:10018]	RING1	334.46	0.320799	0.0696468	4.60609	4.10318e-06	4.81356e-05
ENSG00000164615,5	819	calcium modulating ligand [Source:HGNC Symbol;Acc:HGNC:1471]	CAMLG	165.662	-0.376815	0.0818252	-4.60513	4.12212e-06	4.83289e-05
ENSG00000050767,17	91522	collagen type XXIII alpha 1 chain [Source:HGNC Symbol;Acc:HGNC:22990]	COL23A1	19.2917	0.959003	0.208287	4.60424	4.13973e-06	4.85066e-05
ENSG00000149480,7	9219	metastasis associated 1 family member 2 [Source:HGNC Symbol;Acc:HGNC:7411]	MTA2	830.573	0.21881	0.0475263	4.60398	4.14488e-06	4.85381e-05
ENSG00000110074,11	55572	FAD dependent oxidoreductase domain containing 1 [Source:HGNC Symbol;Acc:HGNC:26927]	FOXRED1	253.427	0.304509	0.0661566	4.60285	4.16754e-06	4.87746e-05
ENSG00000181449,4	6657	SRY-box transcription factor 2 [Source:HGNC Symbol;Acc:HGNC:11195]	SOX2	1720.69	-0.189818	0.0412518	-4.60146	4.19548e-06	4.90725e-05
ENSG00000203667,10	116228	cytochrome c oxidase assembly factor COX20 [Source:HGNC Symbol;Acc:HGNC:26970]	COX20	544.416	0.35338	0.0768115	4.60061	4.21264e-06	4.9244e-05
ENSG00000196776,16	961	CD47 molecule [Source:HGNC Symbol;Acc:HGNC:1682]	CD47	998.579	-0.275144	0.0598139	-4.60001	4.22477e-06	4.93565e-05
ENSG00000235106,10	266655	BRD3 opposite strand [Source:HGNC Symbol;Acc:HGNC:24742]	BRD3OS	265.349	-0.319602	0.0694966	-4.59882	4.24891e-06	4.96092e-05
ENSG00000150776,18	55216	NKAP domain containing 1 [Source:HGNC Symbol;Acc:HGNC:25569]	NKAPD1	296.479	0.333545	0.072541	4.59803	4.26505e-06	4.97522e-05
ENSG00000165521,15	161436	EMAP like 5 [Source:HGNC Symbol;Acc:HGNC:18197]	EML5	202.869	0.511169	0.111173	4.59797	4.2662e-06	4.97522e-05
ENSG00000120656,11	6883	TATA-box binding protein associated factor 12 [Source:HGNC Symbol;Acc:HGNC:11545]	TAF12	155.304	0.401318	0.0872901	4.59752	4.27548e-06	4.98309e-05
ENSG00000159200,18	1827	regulator of calcineurin 1 [Source:HGNC Symbol;Acc:HGNC:3040]	RCAN1	1136.41	-0.296759	0.06456	-4.59664	4.29359e-06	5.00125e-05
ENSG00000010278,14	928	CD9 molecule [Source:HGNC Symbol;Acc:HGNC:1709]	CD9	2176.71	-0.198709	0.0432411	-4.59538	4.31966e-06	5.02865e-05
ENSG00000065457,10	23536	adenosine deaminase tRNA specific 1 [Source:HGNC Symbol;Acc:HGNC:228]	ADAT1	268.355	0.277817	0.0604594	4.5951	4.32536e-06	5.03231e-05
ENSG00000212747,5	441518	retrotransposon Gag like 8B [Source:HGNC Symbol;Acc:HGNC:33156]	RTL8B	136.028	0.368244	0.0801737	4.59308	4.3676e-06	5.07846e-05
ENSG00000205133,12	286144	triple QxxK/R motif containing [Source:HGNC Symbol;Acc:HGNC:27828]	TRIQK	273.645	-0.41165	0.0896359	-4.59247	4.3803e-06	5.09023e-05
ENSG00000165626,17	222389	BEN domain containing 7 [Source:HGNC Symbol;Acc:HGNC:23514]	BEND7	148.341	0.442195	0.0962999	4.59185	4.39331e-06	5.10234e-05
ENSG00000116678,19	3953	leptin receptor [Source:HGNC Symbol;Acc:HGNC:6554]	LEPR	25.7921	-1.17157	0.25519	-4.59097	4.41197e-06	5.121e-05
ENSG00000079931,15	26002	monooxygenase DBH like 1 [Source:HGNC Symbol;Acc:HGNC:21063]	MOXD1	25.3315	0.894015	0.194815	4.58905	4.45267e-06	5.1652e-05
ENSG00000172575,12	10125	RAS guanyl releasing protein 1 [Source:HGNC Symbol;Acc:HGNC:9878]	RASGRP1	55.8453	-0.655267	0.142814	-4.58827	4.46934e-06	5.1815e-05
ENSG00000170382,12	10446	leucine rich repeat neuronal 2 [Source:HGNC Symbol;Acc:HGNC:16914]	LRRN2	6.73447	-1.74271	0.379942	-4.58677	4.50161e-06	5.21585e-05
ENSG00000102054,17	5931	RB binding protein 7, chromatin remodeling factor [Source:HGNC Symbol;Acc:HGNC:9890]	RBBP7	964.208	0.201822	0.0440115	4.58566	4.52552e-06	5.24047e-05
ENSG00000171298,13	2548	glucosidase alpha, acid [Source:HGNC Symbol;Acc:HGNC:4065]	GAA	157.848	-0.862979	0.188213	-4.58511	4.53739e-06	5.25113e-05
ENSG00000090530,10	55214	prolyl 3-hydroxylase 2 [Source:HGNC Symbol;Acc:HGNC:19317]	P3H2	83.4076	0.655662	0.143035	4.58391	4.56352e-06	5.27828e-05
ENSG00000164054,15	51246	shisa family member 5 [Source:HGNC Symbol;Acc:HGNC:30376]	SHISA5	531.413	-0.371962	0.0811476	-4.58378	4.56655e-06	5.27869e-05
ENSG00000258891,1	NA	novel transcript, antisense to ZNF410	AC005480,1	74.6793	0.496318	0.108292	4.58316	4.58005e-06	5.29119e-05
ENSG00000108691,9	6347	C-C motif chemokine ligand 2 [Source:HGNC Symbol;Acc:HGNC:10618]	CCL2	208.762	-0.589363	0.128627	-4.58196	4.6064e-06	5.31852e-05
ENSG00000127334,10	8445	dual specificity tyrosine phosphorylation regulated kinase 2 [Source:HGNC Symbol;Acc:HGNC:3093]	DYRK2	208.666	0.315618	0.0688951	4.58113	4.62464e-06	5.33646e-05
ENSG00000213719,8	1192	chloride intracellular channel 1 [Source:HGNC Symbol;Acc:HGNC:2062]	CLIC1	2078.07	-0.25743	0.0562044	-4.58025	4.64421e-06	5.35591e-05
ENSG00000160963,14	136227	collagen type XXVI alpha 1 chain [Source:HGNC Symbol;Acc:HGNC:18038]	COL26A1	27.1664	1.03001	0.224889	4.5801	4.64755e-06	5.35663e-05
ENSG00000188483,8	389792	immediate early response 5 like [Source:HGNC Symbol;Acc:HGNC:23679]	IER5L	51.1748	-0.947068	0.206812	-4.57937	4.66387e-06	5.3723e-05
ENSG00000180139,11	NA	ACTA2 antisense RNA 1 [Source:HGNC Symbol;Acc:HGNC:45169]	ACTA2-AS1	30.4369	0.676408	0.147757	4.57785	4.69781e-06	5.40824e-05
ENSG00000269837,1	NA	importin 5 pseudogene 1 [Source:HGNC Symbol;Acc:HGNC:49687]	IPO5P1	96.19	0.429057	0.0937627	4.57599	4.73976e-06	5.45335e-05
ENSG00000023734,11	11171	serine/threonine kinase receptor associated protein [Source:HGNC Symbol;Acc:HGNC:30796]	STRAP	886.407	0.234308	0.0512059	4.57581	4.74388e-06	5.45491e-05
ENSG00000127329,15	5787	protein tyrosine phosphatase receptor type B [Source:HGNC Symbol;Acc:HGNC:9665]	PTPRB	161.394	-0.556125	0.12155	-4.57528	4.75583e-06	5.46546e-05
ENSG00000165821,12	6297	spalt like transcription factor 2 [Source:HGNC Symbol;Acc:HGNC:10526]	SALL2	357.992	-0.279379	0.0610655	-4.57507	4.76062e-06	5.46778e-05
ENSG00000188662,6	NA	histone linker H1 domain, spermatid-specific 1 (pseudogene) [Source:HGNC Symbol;Acc:HGNC:30616]	HILS1	11.6129	1.28719	0.281388	4.57445	4.77477e-06	5.48085e-05
ENSG00000143369,15	1893	extracellular matrix protein 1 [Source:HGNC Symbol;Acc:HGNC:3153]	ECM1	68.3482	-0.661912	0.14471	-4.57405	4.78381e-06	5.48804e-05
ENSG00000100865,15	51550	cyclin dependent kinase 2 interacting protein [Source:HGNC Symbol;Acc:HGNC:23789]	CINP	244.223	0.323669	0.0707704	4.5735	4.79636e-06	5.49923e-05
ENSG00000152944,9	9412	mediator complex subunit 21 [Source:HGNC Symbol;Acc:HGNC:11473]	MED21	230.072	0.366469	0.0801427	4.57271	4.81466e-06	5.51701e-05
ENSG00000226763,5	100170229	serine/arginine repetitive matrix 5 [Source:HGNC Symbol;Acc:HGNC:37248]	SRRM5	307.736	-0.348816	0.0762952	-4.57192	4.8327e-06	5.53447e-05
ENSG00000115970,18	63892	THADA armadillo repeat containing [Source:HGNC Symbol;Acc:HGNC:19217]	THADA	355.048	0.276371	0.0604582	4.57127	4.84766e-06	5.54838e-05
ENSG00000138668,19	3184	heterogeneous nuclear ribonucleoprotein D [Source:HGNC Symbol;Acc:HGNC:5036]	HNRNPD	1210.15	0.253798	0.0555223	4.57111	4.8515e-06	5.54955e-05
ENSG00000258701,1	NA	long intergenic non-protein coding RNA 638 [Source:HGNC Symbol;Acc:HGNC:28325]	LINC00638	28.4198	0.882576	0.193219	4.56775	4.92986e-06	5.63592e-05
ENSG00000087470,18	10059	dynamin 1 like [Source:HGNC Symbol;Acc:HGNC:2973]	DNM1L	755.733	0.282729	0.0619039	4.56722	4.94242e-06	5.64701e-05
ENSG00000165495,16	63876	PBX/knotted 1 homeobox 2 [Source:HGNC Symbol;Acc:HGNC:16714]	PKNOX2	39.4468	0.663285	0.145247	4.56661	4.95684e-06	5.6602e-05
ENSG00000119681,12	4053	latent transforming growth factor beta binding protein 2 [Source:HGNC Symbol;Acc:HGNC:6715]	LTBP2	154.417	0.465726	0.102007	4.56564	4.97981e-06	5.68315e-05
ENSG00000006118,14	54972	transmembrane protein 132A [Source:HGNC Symbol;Acc:HGNC:31092]	TMEM132A	517.643	-0.566695	0.12416	-4.56422	5.01356e-06	5.71835e-05
ENSG00000107821,14	81621	Kazal type serine peptidase inhibitor domain 1 [Source:HGNC Symbol;Acc:HGNC:25460]	KAZALD1	128.84	0.498701	0.109277	4.56366	5.02694e-06	5.7303e-05
ENSG00000133134,11	84707	brain expressed X-linked 2 [Source:HGNC Symbol;Acc:HGNC:30933]	BEX2	68.1414	-0.817303	0.179153	-4.56205	5.06571e-06	5.77117e-05
ENSG00000181790,11	575	adhesion G protein-coupled receptor B1 [Source:HGNC Symbol;Acc:HGNC:943]	ADGRB1	196.328	-0.677597	0.148553	-4.56132	5.08321e-06	5.78777e-05
ENSG00000106261,17	7586	zinc finger with KRAB and SCAN domains 1 [Source:HGNC Symbol;Acc:HGNC:13101]	ZKSCAN1	1349.91	0.227135	0.0498137	4.55969	5.12302e-06	5.82972e-05
ENSG00000140553,18	55898	unc-45 myosin chaperone A [Source:HGNC Symbol;Acc:HGNC:30594]	UNC45A	352.576	-0.36816	0.0807469	-4.55943	5.12918e-06	5.83337e-05
ENSG00000102349,18	11279	Kruppel like factor 8 [Source:HGNC Symbol;Acc:HGNC:6351]	KLF8	15.5633	-1.40614	0.308433	-4.55898	5.14035e-06	5.83934e-05
ENSG00000177409,12	219285	sterile alpha motif domain containing 9 like [Source:HGNC Symbol;Acc:HGNC:1349]	SAMD9L	100.659	-0.447401	0.0981354	-4.55901	5.13943e-06	5.83934e-05
ENSG00000248333,8	984	cyclin dependent kinase 11B [Source:HGNC Symbol;Acc:HGNC:1729]	CDK11B	178.389	0.364439	0.0800159	4.55458	5.24907e-06	5.95942e-05
ENSG00000248905,9	342184	formin 1 [Source:HGNC Symbol;Acc:HGNC:3768]	FMN1	11.2059	1.33581	0.293326	4.55402	5.26313e-06	5.97194e-05
ENSG00000146066,3	192286	HIG1 hypoxia inducible domain family member 2A [Source:HGNC Symbol;Acc:HGNC:28311]	HIGD2A	174.603	-0.424779	0.0933081	-4.55244	5.30274e-06	6.01343e-05
ENSG00000105518,14	374882	transmembrane protein 205 [Source:HGNC Symbol;Acc:HGNC:29631]	TMEM205	382.135	-0.406227	0.0892361	-4.55227	5.3071e-06	6.01492e-05
ENSG00000020181,18	25960	adhesion G protein-coupled receptor A2 [Source:HGNC Symbol;Acc:HGNC:17849]	ADGRA2	84.7188	-0.515887	0.113359	-4.5509	5.34159e-06	6.05053e-05
ENSG00000071575,11	28951	tribbles pseudokinase 2 [Source:HGNC Symbol;Acc:HGNC:30809]	TRIB2	4859.43	-0.129784	0.0285246	-4.5499	5.36715e-06	6.076e-05
ENSG00000126953,8	1678	translocase of inner mitochondrial membrane 8A [Source:HGNC Symbol;Acc:HGNC:11817]	TIMM8A	75.6978	0.491769	0.108113	4.54865	5.39902e-06	6.10858e-05
ENSG00000112584,13	84498	family with sequence similarity 120B [Source:HGNC Symbol;Acc:HGNC:21109]	FAM120B	396.187	0.2574	0.0565949	4.54811	5.4129e-06	6.11725e-05
ENSG00000124562,10	6631	small nuclear ribonucleoprotein polypeptide C [Source:HGNC Symbol;Acc:HGNC:11157]	SNRPC	454.375	0.257724	0.056665	4.5482	5.41075e-06	6.11725e-05
ENSG00000143036,17	126969	solute carrier family 44 member 3 [Source:HGNC Symbol;Acc:HGNC:28689]	SLC44A3	10.9108	-1.11847	0.246069	-4.54533	5.48488e-06	6.19506e-05
ENSG00000172216,6	1051	CCAAT enhancer binding protein beta [Source:HGNC Symbol;Acc:HGNC:1834]	CEBPB	147.268	-0.530795	0.11679	-4.54487	5.49688e-06	6.20506e-05
ENSG00000064225,12	10402	ST3 beta-galactoside alpha-2,3-sialyltransferase 6 [Source:HGNC Symbol;Acc:HGNC:18080]	ST3GAL6	291.611	-0.365706	0.0804692	-4.54468	5.50197e-06	6.20726e-05
ENSG00000255438,2	NA	novel transcript, antisense to SULF2	AL354813,1	4.12732	2.55544	0.562486	4.54313	5.54258e-06	6.2495e-05
ENSG00000130202,10	5819	nectin cell adhesion molecule 2 [Source:HGNC Symbol;Acc:HGNC:9707]	NECTIN2	118.347	-0.536438	0.118137	-4.5408	5.60402e-06	6.31517e-05
ENSG00000134744,14	23318	terminal uridylyl transferase 4 [Source:HGNC Symbol;Acc:HGNC:28981]	TUT4	509.956	0.276429	0.0609275	4.53702	5.70536e-06	6.4257e-05
ENSG00000170113,16	123606	NIPA magnesium transporter 1 [Source:HGNC Symbol;Acc:HGNC:17043]	NIPA1	410.984	-0.309557	0.0682369	-4.53651	5.7194e-06	6.43783e-05
ENSG00000145681,11	1404	hyaluronan and proteoglycan link protein 1 [Source:HGNC Symbol;Acc:HGNC:2380]	HAPLN1	2.46635	-4.00497	0.883488	-4.53314	5.81138e-06	6.53763e-05
ENSG00000124788,18	6310	ataxin 1 [Source:HGNC Symbol;Acc:HGNC:10548]	ATXN1	542.525	-0.244581	0.0539638	-4.53232	5.83394e-06	6.55559e-05
ENSG00000178980,15	6415	selenoprotein W [Source:HGNC Symbol;Acc:HGNC:10752]	SELENOW	598.76	-0.237621	0.052428	-4.53232	5.83398e-06	6.55559e-05
ENSG00000162975,5	3754	potassium voltage-gated channel modifier subfamily F member 1 [Source:HGNC Symbol;Acc:HGNC:6246]	KCNF1	15.8049	-1.66638	0.367847	-4.53009	5.89588e-06	6.62138e-05
ENSG00000278948,1	NA	TEC	AL031587,5	83.8778	-0.479301	0.105809	-4.52987	5.90193e-06	6.6244e-05
ENSG00000149557,14	9638	fasciculation and elongation protein zeta 1 [Source:HGNC Symbol;Acc:HGNC:3659]	FEZ1	1206.09	-0.225437	0.0497787	-4.52878	5.93258e-06	6.65501e-05
ENSG00000145685,14	10184	LHFPL tetraspan subfamily member 2 [Source:HGNC Symbol;Acc:HGNC:6588]	LHFPL2	299.144	-0.297637	0.0657385	-4.52758	5.9662e-06	6.68892e-05
ENSG00000061936,9	6433	splicing factor SWAP [Source:HGNC Symbol;Acc:HGNC:10790]	SFSWAP	331.627	0.307376	0.0679015	4.52679	5.9887e-06	6.70982e-05
ENSG00000197119,13	123096	solute carrier family 25 member 29 [Source:HGNC Symbol;Acc:HGNC:20116]	SLC25A29	403.367	0.447844	0.0989341	4.52668	5.99164e-06	6.70982e-05
ENSG00000236404,10	401491	VLDLR antisense RNA 1 [Source:HGNC Symbol;Acc:HGNC:49621]	VLDLR-AS1	67.7354	-0.657042	0.145192	-4.52533	6.03007e-06	6.74903e-05
ENSG00000075856,12	9733	spliceosome associated factor 3, U4/U6 recycling protein [Source:HGNC Symbol;Acc:HGNC:16860]	SART3	523.057	0.207974	0.0459783	4.5233	6.08829e-06	6.81032e-05
ENSG00000186907,8	349667	reticulon 4 receptor like 2 [Source:HGNC Symbol;Acc:HGNC:23053]	RTN4RL2	276.014	-0.770601	0.170395	-4.52243	6.11332e-06	6.83444e-05
ENSG00000110076,18	9379	neurexin 2 [Source:HGNC Symbol;Acc:HGNC:8009]	NRXN2	52.9468	-0.723397	0.159981	-4.52178	6.13222e-06	6.8517e-05
ENSG00000135912,11	9654	tubulin tyrosine ligase like 4 [Source:HGNC Symbol;Acc:HGNC:28976]	TTLL4	333.671	0.2609	0.0577038	4.52136	6.14445e-06	6.86148e-05
ENSG00000171812,13	1296	collagen type VIII alpha 2 chain [Source:HGNC Symbol;Acc:HGNC:2216]	COL8A2	15.8265	-1.30933	0.289634	-4.52063	6.16548e-06	6.88107e-05
ENSG00000060237,17	65125	WNK lysine deficient protein kinase 1 [Source:HGNC Symbol;Acc:HGNC:14540]	WNK1	2350.06	0.207726	0.0459539	4.52032	6.17464e-06	6.88739e-05
ENSG00000161381,14	57125	plexin domain containing 1 [Source:HGNC Symbol;Acc:HGNC:20945]	PLXDC1	14.0898	-1.32197	0.292471	-4.52	6.1839e-06	6.88993e-05
ENSG00000197343,11	79027	zinc finger protein 655 [Source:HGNC Symbol;Acc:HGNC:30899]	ZNF655	856.89	0.300443	0.0664687	4.52007	6.18186e-06	6.88993e-05
ENSG00000115827,14	80067	DDB1 and CUL4 associated factor 17 [Source:HGNC Symbol;Acc:HGNC:25784]	DCAF17	227.408	0.315169	0.0697475	4.51872	6.22146e-06	6.92787e-05
ENSG00000135521,9	84946	LTV1 ribosome biogenesis factor [Source:HGNC Symbol;Acc:HGNC:21173]	LTV1	124.081	0.527583	0.116761	4.5185	6.22794e-06	6.93118e-05
ENSG00000135525,18	9053	microtubule associated protein 7 [Source:HGNC Symbol;Acc:HGNC:6869]	MAP7	84.222	-0.499849	0.110657	-4.5171	6.26911e-06	6.97306e-05
ENSG00000105048,17	7138	troponin T1, slow skeletal type [Source:HGNC Symbol;Acc:HGNC:11948]	TNNT1	11.7472	-2.42346	0.536886	-4.51392	6.36395e-06	7.07456e-05
ENSG00000166401,15	5271	serpin family B member 8 [Source:HGNC Symbol;Acc:HGNC:8952]	SERPINB8	111.433	-0.541935	0.120129	-4.51129	6.44347e-06	7.15892e-05
ENSG00000101198,15	128414	sodium/potassium transporting ATPase interacting 4 [Source:HGNC Symbol;Acc:HGNC:16191]	NKAIN4	8.21462	-1.63858	0.363245	-4.51094	6.45405e-06	7.16665e-05
ENSG00000287211,1	NA	novel transcript	AL121904,2	3.03178	2.63528	0.58433	4.50993	6.48501e-06	7.19698e-05
ENSG00000135454,14	2583	beta-1,4-N-acetyl-galactosaminyltransferase 1 [Source:HGNC Symbol;Acc:HGNC:4117]	B4GALNT1	716.899	-0.201198	0.0446252	-4.50862	6.52504e-06	7.23733e-05
ENSG00000234961,1	NA	novel transcript	AL133415,1	14265.6	-0.232204	0.0515041	-4.50846	6.53012e-06	7.23889e-05
ENSG00000091127,14	54517	pseudouridine synthase 7 [Source:HGNC Symbol;Acc:HGNC:26033]	PUS7	207.16	0.354401	0.078611	4.50828	6.53538e-06	7.24066e-05
ENSG00000143772,9	3707	inositol-trisphosphate 3-kinase B [Source:HGNC Symbol;Acc:HGNC:6179]	ITPKB	335.555	-0.33811	0.0750009	-4.50809	6.54153e-06	7.24341e-05
ENSG00000182326,15	716	complement C1s [Source:HGNC Symbol;Acc:HGNC:1247]	C1S	71.3637	-0.489579	0.108629	-4.50688	6.57877e-06	7.28055e-05
ENSG00000182667,14	50863	neurotrimin [Source:HGNC Symbol;Acc:HGNC:17941]	NTM	363.098	-0.242491	0.0538141	-4.50609	6.60345e-06	7.30377e-05
ENSG00000106554,13	54927	coiled-coil-helix-coiled-coil-helix domain containing 3 [Source:HGNC Symbol;Acc:HGNC:21906]	CHCHD3	597.476	0.253902	0.0563514	4.5057	6.61556e-06	7.31306e-05
ENSG00000184716,13	619189	serine incorporator 4 [Source:HGNC Symbol;Acc:HGNC:32237]	SERINC4	138.044	-0.424962	0.0943274	-4.50518	6.63163e-06	7.32673e-05
ENSG00000121741,16	7750	zinc finger MYM-type containing 2 [Source:HGNC Symbol;Acc:HGNC:12989]	ZMYM2	740.148	-0.34174	0.0758586	-4.50497	6.63836e-06	7.33005e-05
ENSG00000136156,15	9445	integral membrane protein 2B [Source:HGNC Symbol;Acc:HGNC:6174]	ITM2B	1386.82	-0.241256	0.0535828	-4.50248	6.71637e-06	7.41204e-05
ENSG00000105058,12	26017	family with sequence similarity 32 member A [Source:HGNC Symbol;Acc:HGNC:24563]	FAM32A	657.287	0.209346	0.0464981	4.50226	6.72356e-06	7.41583e-05
ENSG00000023171,18	57476	GRAM domain containing 1B [Source:HGNC Symbol;Acc:HGNC:29214]	GRAMD1B	82.0532	0.441113	0.0980029	4.50102	6.76272e-06	7.45137e-05
ENSG00000162694,14	2135	exostosin like glycosyltransferase 2 [Source:HGNC Symbol;Acc:HGNC:3516]	EXTL2	356.266	0.364378	0.0809549	4.501	6.76333e-06	7.45137e-05
ENSG00000177733,7	10949	heterogeneous nuclear ribonucleoprotein A0 [Source:HGNC Symbol;Acc:HGNC:5030]	HNRNPA0	950.31	-0.231382	0.051417	-4.50011	6.79196e-06	7.47874e-05
ENSG00000121297,8	57616	teashirt zinc finger homeobox 3 [Source:HGNC Symbol;Acc:HGNC:30700]	TSHZ3	186.271	0.39608	0.0880542	4.49814	6.85515e-06	7.54411e-05
ENSG00000120162,10	79817	MOB kinase activator 3B [Source:HGNC Symbol;Acc:HGNC:23825]	MOB3B	88.3067	0.428327	0.0952377	4.49745	6.87719e-06	7.56415e-05
ENSG00000099822,3	610	hyperpolarization activated cyclic nucleotide gated potassium and sodium channel 2 [Source:HGNC Symbol;Acc:HGNC:4846]	HCN2	156.289	-0.57604	0.128139	-4.49543	6.94284e-06	7.62924e-05
ENSG00000149311,18	472	ATM serine/threonine kinase [Source:HGNC Symbol;Acc:HGNC:795]	ATM	686.6	0.31329	0.0696914	4.49539	6.94411e-06	7.62924e-05
ENSG00000089327,15	53827	FXYD domain containing ion transport regulator 5 [Source:HGNC Symbol;Acc:HGNC:4029]	FXYD5	6.16982	-1.71289	0.381154	-4.49394	6.99161e-06	7.67716e-05
ENSG00000100284,21	10043	target of myb1 membrane trafficking protein [Source:HGNC Symbol;Acc:HGNC:11982]	TOM1	100.907	-0.612265	0.136259	-4.49338	7.01023e-06	7.69331e-05
ENSG00000105819,14	9512	peptidase, mitochondrial processing beta subunit [Source:HGNC Symbol;Acc:HGNC:9119]	PMPCB	608.928	0.26168	0.0582496	4.49239	7.04282e-06	7.72478e-05
ENSG00000154856,13	147495	APC down-regulated 1 [Source:HGNC Symbol;Acc:HGNC:15718]	APCDD1	161.824	-0.33719	0.0751011	-4.48981	7.12874e-06	7.81469e-05
ENSG00000170271,11	10826	fatty acid hydroxylase domain containing 2 [Source:HGNC Symbol;Acc:HGNC:1334]	FAXDC2	78.8685	-0.546376	0.121736	-4.48819	7.18319e-06	7.87e-05
ENSG00000213923,12	1454	casein kinase 1 epsilon [Source:HGNC Symbol;Acc:HGNC:2453]	CSNK1E	452.627	-0.292437	0.0651605	-4.48794	7.19139e-06	7.87461e-05
ENSG00000088538,13	1795	dedicator of cytokinesis 3 [Source:HGNC Symbol;Acc:HGNC:2989]	DOCK3	32.2639	0.671315	0.149612	4.48705	7.22153e-06	7.90123e-05
ENSG00000148655,15	83938	leucine rich melanocyte differentiation associated [Source:HGNC Symbol;Acc:HGNC:23405]	LRMDA	14.8181	-1.35124	0.301146	-4.48699	7.2237e-06	7.90123e-05
ENSG00000154639,19	1525	CXADR Ig-like cell adhesion molecule [Source:HGNC Symbol;Acc:HGNC:2559]	CXADR	319.445	-0.421559	0.0939833	-4.48546	7.27551e-06	7.95348e-05
ENSG00000138382,15	29081	methyltransferase like 5 [Source:HGNC Symbol;Acc:HGNC:25006]	METTL5	331.007	0.396298	0.0883845	4.48379	7.33283e-06	8.01171e-05
ENSG00000198315,11	7745	zinc finger with KRAB and SCAN domains 8 [Source:HGNC Symbol;Acc:HGNC:12983]	ZKSCAN8	690.876	0.250454	0.055889	4.48127	7.41985e-06	8.10229e-05
ENSG00000183476,12	646892	SH2 domain containing 7 [Source:HGNC Symbol;Acc:HGNC:34549]	SH2D7	22.1189	-0.8574	0.191401	-4.4796	7.47833e-06	8.16164e-05
ENSG00000198563,14	7919	DExD-box helicase 39B [Source:HGNC Symbol;Acc:HGNC:13917]	DDX39B	809.293	0.331758	0.0740685	4.47907	7.49672e-06	8.17719e-05
ENSG00000185115,6	56160	NSE3 homolog, SMC5-SMC6 complex component [Source:HGNC Symbol;Acc:HGNC:7677]	NSMCE3	170.7	-0.358313	0.0800047	-4.47866	7.51144e-06	8.18487e-05
ENSG00000187801,15	65243	ZFP69 zinc finger protein B [Source:HGNC Symbol;Acc:HGNC:28053]	ZFP69B	47.2003	0.600248	0.134025	4.47864	7.51206e-06	8.18487e-05
ENSG00000227407,1	NA	novel transcript	AC245884,1	128.565	-0.530177	0.118404	-4.4777	7.54508e-06	8.21452e-05
ENSG00000236886,2	NA	novel transcript, antisense to IGFBP5 and TNP1	AC007563,2	90.0864	1.04629	0.23367	4.47763	7.5476e-06	8.21452e-05
ENSG00000238258,1	NA	novel transcript, antisense to NRP1	AL121748,1	35.4866	-1.63613	0.365481	-4.47664	7.58264e-06	8.24811e-05
ENSG00000100938,17	51292	guanosine monophosphate reductase 2 [Source:HGNC Symbol;Acc:HGNC:4377]	GMPR2	482.631	0.242293	0.0541264	4.47643	7.59017e-06	8.25175e-05
ENSG00000137338,5	84547	piggyBac transposable element derived 1 [Source:HGNC Symbol;Acc:HGNC:19398]	PGBD1	98.6477	0.424281	0.0948214	4.47453	7.65795e-06	8.32085e-05
ENSG00000088387,19	23348	dedicator of cytokinesis 9 [Source:HGNC Symbol;Acc:HGNC:14132]	DOCK9	298.191	-0.300865	0.067317	-4.46938	7.84472e-06	8.51878e-05
ENSG00000162804,14	25992	sushi, nidogen and EGF like domains 1 [Source:HGNC Symbol;Acc:HGNC:24696]	SNED1	318.875	0.364913	0.0816493	4.46927	7.84874e-06	8.51878e-05
ENSG00000205181,7	NA	long intergenic non-protein coding RNA 654 [Source:HGNC Symbol;Acc:HGNC:27154]	LINC00654	5.7673	-2.74687	0.614684	-4.46876	7.86759e-06	8.53454e-05
ENSG00000148411,8	138151	NACC family member 2 [Source:HGNC Symbol;Acc:HGNC:23846]	NACC2	544.555	-0.331382	0.074173	-4.46769	7.90688e-06	8.57245e-05
ENSG00000165516,11	23588	kelch domain containing 2 [Source:HGNC Symbol;Acc:HGNC:20231]	KLHDC2	486.61	0.297563	0.066613	4.46704	7.93092e-06	8.59379e-05
ENSG00000019549,13	6591	snail family transcriptional repressor 2 [Source:HGNC Symbol;Acc:HGNC:11094]	SNAI2	122.909	-0.424636	0.0950651	-4.4668	7.93999e-06	8.5989e-05
ENSG00000101868,11	5422	DNA polymerase alpha 1, catalytic subunit [Source:HGNC Symbol;Acc:HGNC:9173]	POLA1	313.189	0.309812	0.069369	4.46614	7.96433e-06	8.61108e-05
ENSG00000234465,11	390940	phospholipase A2 inhibitor and LY6/PLAUR domain containing [Source:HGNC Symbol;Acc:HGNC:44206]	PINLYP	48.8296	-0.687852	0.154012	-4.46621	7.96173e-06	8.61108e-05
ENSG00000245105,4	NA	A2M antisense RNA 1 [Source:HGNC Symbol;Acc:HGNC:27057]	A2M-AS1	50.9159	-0.607691	0.136064	-4.46623	7.96106e-06	8.61108e-05
ENSG00000279660,1	NA	novel transcript	AC005703,6	116.132	-0.438456	0.0982146	-4.46426	8.03441e-06	8.68209e-05
ENSG00000169826,8	55454	chondroitin sulfate N-acetylgalactosaminyltransferase 2 [Source:HGNC Symbol;Acc:HGNC:24292]	CSGALNACT2	293.258	0.332536	0.0744974	4.46372	8.0547e-06	8.69925e-05
ENSG00000100567,13	5684	proteasome subunit alpha 3 [Source:HGNC Symbol;Acc:HGNC:9532]	PSMA3	599.909	0.266802	0.0597744	4.46348	8.06391e-06	8.70443e-05
ENSG00000253276,3	168455	coiled-coil domain containing 71 like [Source:HGNC Symbol;Acc:HGNC:26685]	CCDC71L	100.892	-0.528622	0.118481	-4.46168	8.13189e-06	8.77301e-05
ENSG00000144224,17	23190	UBX domain protein 4 [Source:HGNC Symbol;Acc:HGNC:14860]	UBXN4	390.861	0.314569	0.0705098	4.46135	8.14456e-06	8.78189e-05
ENSG00000024422,12	30846	EH domain containing 2 [Source:HGNC Symbol;Acc:HGNC:3243]	EHD2	507.624	-0.417363	0.0935718	-4.46035	8.18258e-06	8.81806e-05
ENSG00000166734,20	113201	cancer susceptibility 4 [Source:HGNC Symbol;Acc:HGNC:24892]	CASC4	1035.69	-0.29258	0.0656	-4.46006	8.19374e-06	8.82527e-05
ENSG00000100697,14	23405	dicer 1, ribonuclease III [Source:HGNC Symbol;Acc:HGNC:17098]	DICER1	1067.73	0.240204	0.0538762	4.45845	8.25563e-06	8.88707e-05
ENSG00000188338,15	10991	solute carrier family 38 member 3 [Source:HGNC Symbol;Acc:HGNC:18044]	SLC38A3	236.926	-0.353288	0.0792521	-4.45777	8.28159e-06	8.91016e-05
ENSG00000166349,9	5896	recombination activating 1 [Source:HGNC Symbol;Acc:HGNC:9831]	RAG1	22.7975	-0.902348	0.20251	-4.45583	8.35696e-06	8.98635e-05
ENSG00000106278,12	5803	protein tyrosine phosphatase receptor type Z1 [Source:HGNC Symbol;Acc:HGNC:9685]	PTPRZ1	16952	-0.25106	0.0563508	-4.45531	8.37738e-06	9.0034e-05
ENSG00000196526,10	60312	actin filament associated protein 1 [Source:HGNC Symbol;Acc:HGNC:24017]	AFAP1	347.206	-0.24766	0.055615	-4.45311	8.46335e-06	9.09084e-05
ENSG00000151090,19	7068	thyroid hormone receptor beta [Source:HGNC Symbol;Acc:HGNC:11799]	THRB	84.0271	0.452867	0.101713	4.4524	8.49167e-06	9.1163e-05
ENSG00000066427,24	4287	ataxin 3 [Source:HGNC Symbol;Acc:HGNC:7106]	ATXN3	123.42	0.435544	0.0978523	4.45103	8.54586e-06	9.16181e-05
ENSG00000155980,12	3798	kinesin family member 5A [Source:HGNC Symbol;Acc:HGNC:6323]	KIF5A	254.613	-0.292891	0.065802	-4.45109	8.54348e-06	9.16181e-05
ENSG00000187098,15	4286	melanocyte inducing transcription factor [Source:HGNC Symbol;Acc:HGNC:7105]	MITF	23.5219	-1.05076	0.236074	-4.45098	8.54799e-06	9.16181e-05
ENSG00000074935,14	51175	tubulin epsilon 1 [Source:HGNC Symbol;Acc:HGNC:20775]	TUBE1	176.413	0.410419	0.0922144	4.4507	8.55907e-06	9.1687e-05
ENSG00000162377,6	65260	cytochrome c oxidase assembly factor 7 (putative) [Source:HGNC Symbol;Acc:HGNC:25716]	COA7	270.376	0.269215	0.0604914	4.45047	8.5683e-06	9.17362e-05
ENSG00000163050,17	56997	coenzyme Q8A [Source:HGNC Symbol;Acc:HGNC:16812]	COQ8A	66.5324	-0.641894	0.14424	-4.45017	8.58032e-06	9.1815e-05
ENSG00000197124,12	91120	zinc finger protein 682 [Source:HGNC Symbol;Acc:HGNC:28857]	ZNF682	189.792	0.373663	0.0839976	4.4485	8.64722e-06	9.24808e-05
ENSG00000253200,1	NA	novel transcript, antisense to KIAA1967	AC037459,2	322.917	0.278764	0.0626712	4.44804	8.66587e-06	9.263e-05
ENSG00000157741,15	254048	ubinuclein 2 [Source:HGNC Symbol;Acc:HGNC:21931]	UBN2	480.333	0.304833	0.0685443	4.44724	8.69822e-06	9.29254e-05
ENSG00000171877,21	84978	FERM domain containing 5 [Source:HGNC Symbol;Acc:HGNC:28214]	FRMD5	326.944	-0.36817	0.0828224	-4.44529	8.77729e-06	9.37194e-05
ENSG00000131153,9	51659	GINS complex subunit 2 [Source:HGNC Symbol;Acc:HGNC:24575]	GINS2	399.212	0.261856	0.0589331	4.44327	8.86024e-06	9.45539e-05
ENSG00000114503,11	22916	nuclear cap binding protein subunit 2 [Source:HGNC Symbol;Acc:HGNC:7659]	NCBP2	1074.53	0.250645	0.056413	4.44304	8.8696e-06	9.46027e-05
ENSG00000143862,8	127829	ADP ribosylation factor like GTPase 8A [Source:HGNC Symbol;Acc:HGNC:25192]	ARL8A	187.467	-0.364273	0.0819914	-4.44283	8.87847e-06	9.46461e-05
ENSG00000112559,14	4188	MyoD family inhibitor [Source:HGNC Symbol;Acc:HGNC:6967]	MDFI	32.6439	0.799477	0.180018	4.44109	8.95056e-06	9.52602e-05
ENSG00000131507,11	80762	Nedd4 family interacting protein 1 [Source:HGNC Symbol;Acc:HGNC:17592]	NDFIP1	1395.39	-0.260531	0.058662	-4.44123	8.94473e-06	9.52602e-05
ENSG00000142396,10	NA	endogenous retrovirus group K3 member 1 [Source:HGNC Symbol;Acc:HGNC:30466]	ERVK3-1	203.879	0.331862	0.0747241	4.44116	8.94745e-06	9.52602e-05
ENSG00000204519,11	90233	zinc finger protein 551 [Source:HGNC Symbol;Acc:HGNC:25108]	ZNF551	242.768	0.277786	0.0625555	4.44064	8.96926e-06	9.54078e-05
ENSG00000092531,10	8773	synaptosome associated protein 23 [Source:HGNC Symbol;Acc:HGNC:11131]	SNAP23	395.025	-0.298486	0.0672244	-4.44015	8.98976e-06	9.55744e-05
ENSG00000114859,16	1181	chloride voltage-gated channel 2 [Source:HGNC Symbol;Acc:HGNC:2020]	CLCN2	294.228	-0.387673	0.0873252	-4.43942	9.02033e-06	9.58477e-05
ENSG00000213380,15	84342	component of oligomeric golgi complex 8 [Source:HGNC Symbol;Acc:HGNC:18623]	COG8	352.716	0.261579	0.0589243	4.43924	9.02768e-06	9.58742e-05
ENSG00000165476,14	221035	receptor accessory protein 3 [Source:HGNC Symbol;Acc:HGNC:23711]	REEP3	350.516	-0.313855	0.0707385	-4.43683	9.12925e-06	9.69007e-05
ENSG00000157557,13	2114	ETS proto-oncogene 2, transcription factor [Source:HGNC Symbol;Acc:HGNC:3489]	ETS2	43.869	0.616336	0.138975	4.43487	9.2126e-06	9.77328e-05
ENSG00000110786,18	84867	protein tyrosine phosphatase non-receptor type 5 [Source:HGNC Symbol;Acc:HGNC:9657]	PTPN5	7.75762	-3.81637	0.86092	-4.4329	9.29747e-06	9.85802e-05
ENSG00000109118,14	57649	PHD finger protein 12 [Source:HGNC Symbol;Acc:HGNC:20816]	PHF12	545.893	-0.218917	0.0493973	-4.43176	9.34686e-06	9.90113e-05
ENSG00000170545,17	57228	small cell adhesion glycoprotein [Source:HGNC Symbol;Acc:HGNC:26918]	SMAGP	29.9873	0.783584	0.176812	4.43173	9.34816e-06	9.90113e-05
ENSG00000136099,13	5100	protocadherin 8 [Source:HGNC Symbol;Acc:HGNC:8660]	PCDH8	26.8316	-0.86879	0.196166	-4.42884	9.47398e-06	0.00010029
ENSG00000196547,15	4122	mannosidase alpha class 2A member 2 [Source:HGNC Symbol;Acc:HGNC:6825]	MAN2A2	562.156	-0.27501	0.0621103	-4.42777	9.52118e-06	0.000100736
ENSG00000170633,16	80196	ring finger protein 34 [Source:HGNC Symbol;Acc:HGNC:17297]	RNF34	307.939	0.248659	0.0561723	4.42671	9.56797e-06	0.000101176
ENSG00000173083,15	10855	heparanase [Source:HGNC Symbol;Acc:HGNC:5164]	HPSE	43.3331	-0.637537	0.144054	-4.42567	9.61434e-06	0.000101579
ENSG00000174652,19	10781	zinc finger protein 266 [Source:HGNC Symbol;Acc:HGNC:13059]	ZNF266	562.949	0.268507	0.060671	4.42562	9.61638e-06	0.000101579
ENSG00000160460,16	57731	spectrin beta, non-erythrocytic 4 [Source:HGNC Symbol;Acc:HGNC:14896]	SPTBN4	20.6751	-1.30204	0.294341	-4.42357	9.70829e-06	0.000102495
ENSG00000144647,6	84892	protein O-linked mannose N-acetylglucosaminyltransferase 2 (beta 1,4-) [Source:HGNC Symbol;Acc:HGNC:25902]	POMGNT2	184.046	-0.400308	0.0905131	-4.42265	9.74968e-06	0.000102767
ENSG00000159459,12	197131	ubiquitin protein ligase E3 component n-recognin 1 [Source:HGNC Symbol;Acc:HGNC:16808]	UBR1	402.807	-0.294941	0.0666856	-4.42286	9.74041e-06	0.000102767
ENSG00000224318,6	NA	CHL1 antisense RNA 2 [Source:HGNC Symbol;Acc:HGNC:40147]	CHL1-AS2	31.7979	-0.728485	0.164713	-4.42274	9.74551e-06	0.000102767
ENSG00000123352,17	65244	spermatogenesis associated serine rich 2 [Source:HGNC Symbol;Acc:HGNC:18650]	SPATS2	284.206	0.302395	0.0683847	4.42197	9.78058e-06	0.000103038
ENSG00000120318,16	64411	ArfGAP with RhoGAP domain, ankyrin repeat and PH domain 3 [Source:HGNC Symbol;Acc:HGNC:24097]	ARAP3	443.103	-0.294591	0.0666501	-4.41996	9.87174e-06	0.000103943
ENSG00000100413,17	171568	RNA polymerase III subunit H [Source:HGNC Symbol;Acc:HGNC:30349]	POLR3H	544.405	-0.28488	0.0644733	-4.41857	9.93539e-06	0.000104502
ENSG00000146282,18	57038	arginyl-tRNA synthetase 2, mitochondrial [Source:HGNC Symbol;Acc:HGNC:21406]	RARS2	310.859	0.2911	0.0658808	4.41858	9.93523e-06	0.000104502
ENSG00000254635,6	NA	WAC antisense RNA 1 (head to head) [Source:HGNC Symbol;Acc:HGNC:27347]	WAC-AS1	168.791	0.372816	0.0843785	4.41838	9.94457e-06	0.000104542
ENSG00000110651,11	975	CD81 molecule [Source:HGNC Symbol;Acc:HGNC:1701]	CD81	781.067	-0.346842	0.0785202	-4.41723	9.99755e-06	0.000105043
ENSG00000116251,11	6146	ribosomal protein L22 [Source:HGNC Symbol;Acc:HGNC:10315]	RPL22	368.083	-0.258699	0.0585844	-4.41583	1.00622e-05	0.000105666
ENSG00000090615,15	2802	golgin A3 [Source:HGNC Symbol;Acc:HGNC:4426]	GOLGA3	486.943	0.270825	0.0613531	4.4142	1.01383e-05	0.000106409
ENSG00000049247,13	10911	urotensin 2 [Source:HGNC Symbol;Acc:HGNC:12636]	UTS2	96.7343	-0.446815	0.101227	-4.41401	1.01474e-05	0.000106448
ENSG00000112031,16	54516	mitochondrial translational release factor 1 like [Source:HGNC Symbol;Acc:HGNC:21051]	MTRF1L	58.6888	0.575934	0.130486	4.41376	1.01588e-05	0.000106511
ENSG00000272405,1	NA	novel transcript, antisense to BCAN	AL365181,3	119.803	-0.556992	0.126206	-4.41336	1.0178e-05	0.000106656
ENSG00000136895,19	84253	GTPase activating Rap/RanGAP domain like 3 [Source:HGNC Symbol;Acc:HGNC:25425]	GARNL3	42.7713	-0.751597	0.17031	-4.41312	1.01892e-05	0.000106716
ENSG00000172340,14	8801	succinate-CoA ligase GDP-forming beta subunit [Source:HGNC Symbol;Acc:HGNC:11450]	SUCLG2	268.243	-0.339911	0.077027	-4.41288	1.02005e-05	0.000106778
ENSG00000110200,8	25906	anaphase promoting complex subunit 15 [Source:HGNC Symbol;Acc:HGNC:24531]	ANAPC15	140.26	0.355202	0.0805097	4.41192	1.02459e-05	0.000107196
ENSG00000225792,2	NA	novel transcript	AC004540,2	401.137	0.35581	0.0806704	4.41066	1.03057e-05	0.000107765
ENSG00000100030,14	5594	mitogen-activated protein kinase 1 [Source:HGNC Symbol;Acc:HGNC:6871]	MAPK1	2264.79	-0.201057	0.0456008	-4.40908	1.03812e-05	0.000108497
ENSG00000136381,13	3658	iron responsive element binding protein 2 [Source:HGNC Symbol;Acc:HGNC:6115]	IREB2	624.49	-0.30932	0.0701921	-4.40677	1.04923e-05	0.0001096
ENSG00000101407,13	9675	TELO2 interacting protein 1 [Source:HGNC Symbol;Acc:HGNC:29029]	TTI1	454.126	0.230064	0.0522147	4.40611	1.05241e-05	0.000109874
ENSG00000181045,15	284129	solute carrier family 26 member 11 [Source:HGNC Symbol;Acc:HGNC:14471]	SLC26A11	94.6612	-0.530176	0.120394	-4.40367	1.06435e-05	0.000111062
ENSG00000138111,14	79847	major facilitator superfamily domain containing 13A [Source:HGNC Symbol;Acc:HGNC:26196]	MFSD13A	39.7946	-0.764695	0.173682	-4.40283	1.06847e-05	0.000111432
ENSG00000118971,8	894	cyclin D2 [Source:HGNC Symbol;Acc:HGNC:1583]	CCND2	2470.33	-0.206842	0.0469928	-4.40157	1.07472e-05	0.000112025
ENSG00000048828,17	23196	family with sequence similarity 120A [Source:HGNC Symbol;Acc:HGNC:13247]	FAM120A	734.847	-0.175458	0.0398662	-4.40117	1.07667e-05	0.000112169
ENSG00000162623,16	127253	tRNA-yW synthesizing protein 3 homolog [Source:HGNC Symbol;Acc:HGNC:24757]	TYW3	187.167	0.353313	0.0802969	4.40008	1.08209e-05	0.000112615
ENSG00000232354,8	NA	VIPR1 antisense RNA 1 [Source:HGNC Symbol;Acc:HGNC:40610]	VIPR1-AS1	156.599	0.44509	0.101153	4.40017	1.08164e-05	0.000112615
ENSG00000144827,9	55347	abhydrolase domain containing 10 [Source:HGNC Symbol;Acc:HGNC:25656]	ABHD10	238.148	0.307328	0.069857	4.39938	1.08561e-05	0.000112922
ENSG00000184226,15	5101	protocadherin 9 [Source:HGNC Symbol;Acc:HGNC:8661]	PCDH9	522.478	0.352007	0.0800339	4.39822	1.09142e-05	0.000113467
ENSG00000135821,18	2752	glutamate-ammonia ligase [Source:HGNC Symbol;Acc:HGNC:4341]	GLUL	4619.91	-0.181904	0.0413837	-4.39555	1.10491e-05	0.000114808
ENSG00000123213,23	57486	neurolysin [Source:HGNC Symbol;Acc:HGNC:16058]	NLN	372.925	-0.351235	0.0799176	-4.39496	1.10791e-05	0.000115059
ENSG00000204370,12	6392	succinate dehydrogenase complex subunit D [Source:HGNC Symbol;Acc:HGNC:10683]	SDHD	192.499	0.40906	0.0931279	4.39246	1.12077e-05	0.000116333
ENSG00000260664,2	NA	novel transcript	AC004158,1	124.591	-0.409505	0.0932878	-4.3897	1.13509e-05	0.000117758
ENSG00000196812,5	80345	zinc finger and SCAN domain containing 16 [Source:HGNC Symbol;Acc:HGNC:20813]	ZSCAN16	22.819	0.791041	0.180247	4.38866	1.14053e-05	0.00011826
ENSG00000160211,19	2539	glucose-6-phosphate dehydrogenase [Source:HGNC Symbol;Acc:HGNC:4057]	G6PD	468.552	-0.42118	0.0959763	-4.38838	1.14199e-05	0.00011835
ENSG00000138642,14	55008	HECT and RLD domain containing E3 ubiquitin protein ligase family member 6 [Source:HGNC Symbol;Acc:HGNC:26072]	HERC6	10.8705	-1.16919	0.26684	-4.38162	1.17802e-05	0.000122019
ENSG00000254422,1	NA	novel transcript	AP000942,2	80.6773	0.505973	0.115522	4.3799	1.18736e-05	0.000122922
ENSG00000067560,12	387	ras homolog family member A [Source:HGNC Symbol;Acc:HGNC:667]	RHOA	3610.56	-0.16085	0.0367305	-4.37919	1.1912e-05	0.000123191
ENSG00000111639,8	51258	mitochondrial ribosomal protein L51 [Source:HGNC Symbol;Acc:HGNC:14044]	MRPL51	604.22	0.252811	0.0577291	4.37927	1.19078e-05	0.000123191
ENSG00000196730,13	1612	death associated protein kinase 1 [Source:HGNC Symbol;Acc:HGNC:2674]	DAPK1	77.2321	0.487187	0.111292	4.37755	1.20022e-05	0.000124058
ENSG00000132792,19	56259	catenin beta like 1 [Source:HGNC Symbol;Acc:HGNC:15879]	CTNNBL1	561.793	0.247526	0.0565528	4.37691	1.20375e-05	0.000124358
ENSG00000157212,19	22976	PAX interacting protein 1 [Source:HGNC Symbol;Acc:HGNC:8624]	PAXIP1	374.43	0.265186	0.0606294	4.37389	1.22054e-05	0.000126026
ENSG00000173473,11	6599	SWI/SNF related, matrix associated, actin dependent regulator of chromatin subfamily c member 1 [Source:HGNC Symbol;Acc:HGNC:11104]	SMARCC1	1462.29	0.184675	0.0422325	4.37282	1.22652e-05	0.000126578
ENSG00000128578,10	57464	striatin interacting protein 2 [Source:HGNC Symbol;Acc:HGNC:22209]	STRIP2	191.912	0.401068	0.0917267	4.37243	1.22873e-05	0.000126678
ENSG00000169302,16	202374	serine/threonine kinase 32A [Source:HGNC Symbol;Acc:HGNC:28317]	STK32A	87.4307	-0.538673	0.123198	-4.37242	1.22877e-05	0.000126678
ENSG00000111206,12	2305	forkhead box M1 [Source:HGNC Symbol;Acc:HGNC:3818]	FOXM1	1513.33	0.208915	0.0477836	4.3721	1.23059e-05	0.000126769
ENSG00000223960,7	NA	cholesterol induced regulator of metabolism RNA [Source:HGNC Symbol;Acc:HGNC:54059]	CHROMR	234.631	0.310929	0.0711178	4.37203	1.23094e-05	0.000126769
ENSG00000166979,13	59271	eva-1 homolog C [Source:HGNC Symbol;Acc:HGNC:13239]	EVA1C	141.713	-0.403408	0.0922822	-4.37147	1.23415e-05	0.000127033
ENSG00000140262,17	6938	transcription factor 12 [Source:HGNC Symbol;Acc:HGNC:11623]	TCF12	3558.49	-0.245107	0.0560825	-4.37046	1.23983e-05	0.000127551
ENSG00000185813,10	5833	phosphate cytidylyltransferase 2, ethanolamine [Source:HGNC Symbol;Acc:HGNC:8756]	PCYT2	246.06	-0.373289	0.0854248	-4.36979	1.24365e-05	0.000127878
ENSG00000100242,15	25777	Sad1 and UNC84 domain containing 2 [Source:HGNC Symbol;Acc:HGNC:14210]	SUN2	834.312	-0.394413	0.0902759	-4.36897	1.24831e-05	0.00012829
ENSG00000165731,20	5979	ret proto-oncogene [Source:HGNC Symbol;Acc:HGNC:9967]	RET	100.065	-0.421471	0.0965026	-4.36746	1.257e-05	0.000129116
ENSG00000137815,14	23168	RTF1 homolog, Paf1/RNA polymerase II complex component [Source:HGNC Symbol;Acc:HGNC:28996]	RTF1	815.863	-0.236971	0.0543106	-4.36326	1.28137e-05	0.000131534
ENSG00000170832,13	84669	ubiquitin specific peptidase 32 [Source:HGNC Symbol;Acc:HGNC:19143]	USP32	411.129	-0.312309	0.0715783	-4.36318	1.28188e-05	0.000131534
ENSG00000166912,17	54893	myotubularin related protein 10 [Source:HGNC Symbol;Acc:HGNC:25999]	MTMR10	648.397	-0.237412	0.0544291	-4.36185	1.28965e-05	0.000132263
ENSG00000215788,10	8718	TNF receptor superfamily member 25 [Source:HGNC Symbol;Acc:HGNC:11910]	TNFRSF25	52.4496	-0.812166	0.186208	-4.36161	1.29109e-05	0.000132342
ENSG00000100316,16	6122	ribosomal protein L3 [Source:HGNC Symbol;Acc:HGNC:10332]	RPL3	11399.9	-0.214113	0.0490997	-4.36077	1.29603e-05	0.000132719
ENSG00000103091,15	79726	WD repeat domain 59 [Source:HGNC Symbol;Acc:HGNC:25706]	WDR59	239.825	-0.289166	0.066311	-4.36076	1.29612e-05	0.000132719
ENSG00000006042,12	26022	transmembrane protein 98 [Source:HGNC Symbol;Acc:HGNC:24529]	TMEM98	33.678	-0.632113	0.14499	-4.35971	1.30233e-05	0.000133286
ENSG00000177383,5	64110	MAGE family member F1 [Source:HGNC Symbol;Acc:HGNC:29639]	MAGEF1	646.906	0.187932	0.043124	4.35795	1.31288e-05	0.000134297
ENSG00000068697,7	9741	lysosomal protein transmembrane 4 alpha [Source:HGNC Symbol;Acc:HGNC:6924]	LAPTM4A	980.087	-0.223395	0.0512656	-4.35759	1.31502e-05	0.000134445
ENSG00000011201,12	3730	anosmin 1 [Source:HGNC Symbol;Acc:HGNC:6211]	ANOS1	18.2937	-0.850773	0.195269	-4.35694	1.31894e-05	0.000134776
ENSG00000128482,16	7732	ring finger protein 112 [Source:HGNC Symbol;Acc:HGNC:12968]	RNF112	72.3716	-0.596067	0.136827	-4.35635	1.32247e-05	0.000135067
ENSG00000110955,9	506	ATP synthase F1 subunit beta [Source:HGNC Symbol;Acc:HGNC:830]	ATP5F1B	2926.89	0.149033	0.0342249	4.35453	1.33351e-05	0.000136124
ENSG00000048544,6	55173	mitochondrial ribosomal protein S10 [Source:HGNC Symbol;Acc:HGNC:14502]	MRPS10	214.397	0.321097	0.0737468	4.35405	1.33647e-05	0.000136356
ENSG00000270112,4	NA	novel transcript, antisense to ST8SIA5	AC090241,2	262.561	-0.309642	0.0711272	-4.35336	1.34068e-05	0.000136715
ENSG00000132405,19	57533	TBC1 domain family member 14 [Source:HGNC Symbol;Acc:HGNC:29246]	TBC1D14	567.732	0.190135	0.0436976	4.35115	1.35427e-05	0.00013803
ENSG00000127124,16	59269	human immunodeficiency virus type I enhancer binding protein 3 [Source:HGNC Symbol;Acc:HGNC:13561]	HIVEP3	195.248	-0.329997	0.0758523	-4.35052	1.35812e-05	0.00013835
ENSG00000166135,14	55662	hypoxia inducible factor 1 subunit alpha inhibitor [Source:HGNC Symbol;Acc:HGNC:17113]	HIF1AN	534.164	0.214041	0.0492003	4.3504	1.3589e-05	0.000138358
ENSG00000116133,13	1718	24-dehydrocholesterol reductase [Source:HGNC Symbol;Acc:HGNC:2859]	DHCR24	2386.17	-0.182764	0.0420316	-4.34825	1.3723e-05	0.000139651
ENSG00000168917,9	80723	solute carrier family 35 member G2 [Source:HGNC Symbol;Acc:HGNC:28480]	SLC35G2	38.8219	-0.676144	0.155539	-4.3471	1.3795e-05	0.000140311
ENSG00000197753,11	222662	LHFPL tetraspan subfamily member 5 [Source:HGNC Symbol;Acc:HGNC:21253]	LHFPL5	167.178	0.317876	0.0731344	4.34647	1.38346e-05	0.000140586
ENSG00000279207,1	NA	novel transcript	AC015813,6	285.447	-0.299561	0.068921	-4.34644	1.38363e-05	0.000140586
ENSG00000022840,16	9921	ring finger protein 10 [Source:HGNC Symbol;Acc:HGNC:10055]	RNF10	718.598	0.174526	0.0402004	4.3414	1.41578e-05	0.000143779
ENSG00000198521,11	7594	zinc finger protein 43 [Source:HGNC Symbol;Acc:HGNC:13109]	ZNF43	554.654	0.282928	0.0651805	4.34069	1.42036e-05	0.00014417
ENSG00000112306,8	6206	ribosomal protein S12 [Source:HGNC Symbol;Acc:HGNC:10385]	RPS12	4234.36	0.248082	0.0571635	4.33987	1.42565e-05	0.000144632
ENSG00000106948,16	80709	AT-hook transcription factor [Source:HGNC Symbol;Acc:HGNC:24108]	AKNA	166.097	-0.489997	0.112932	-4.33886	1.43221e-05	0.000145222
ENSG00000106804,7	727	complement C5 [Source:HGNC Symbol;Acc:HGNC:1331]	C5	168.022	0.319079	0.073558	4.33779	1.43923e-05	0.000145789
ENSG00000121152,10	23397	non-SMC condensin I complex subunit H [Source:HGNC Symbol;Acc:HGNC:1112]	NCAPH	661.2	0.212443	0.0489764	4.33767	1.44001e-05	0.000145789
ENSG00000198355,5	415116	Pim-3 proto-oncogene, serine/threonine kinase [Source:HGNC Symbol;Acc:HGNC:19310]	PIM3	203.644	-0.629754	0.145179	-4.33777	1.43935e-05	0.000145789
ENSG00000099139,13	5125	proprotein convertase subtilisin/kexin type 5 [Source:HGNC Symbol;Acc:HGNC:8747]	PCSK5	29.0636	-0.84609	0.195084	-4.33705	1.44408e-05	0.000146126
ENSG00000113231,13	8622	phosphodiesterase 8B [Source:HGNC Symbol;Acc:HGNC:8794]	PDE8B	88.8217	-0.560105	0.129207	-4.33496	1.45786e-05	0.000147445
ENSG00000134323,12	4613	MYCN proto-oncogene, bHLH transcription factor [Source:HGNC Symbol;Acc:HGNC:7559]	MYCN	205.983	-0.359645	0.0829903	-4.33357	1.4671e-05	0.000148303
ENSG00000103852,13	64927	tetratricopeptide repeat domain 23 [Source:HGNC Symbol;Acc:HGNC:25730]	TTC23	291.973	0.275852	0.0636698	4.33255	1.47392e-05	0.00014884
ENSG00000204054,14	NA	long intergenic non-protein coding RNA 963 [Source:HGNC Symbol;Acc:HGNC:48716]	LINC00963	368.693	-0.245743	0.0567197	-4.33259	1.47364e-05	0.00014884
ENSG00000115233,12	10213	proteasome 26S subunit, non-ATPase 14 [Source:HGNC Symbol;Acc:HGNC:16889]	PSMD14	617.991	0.308143	0.0711331	4.33192	1.47815e-05	0.000149191
ENSG00000110274,16	22897	centrosomal protein 164 [Source:HGNC Symbol;Acc:HGNC:29182]	CEP164	211.766	0.305301	0.0705057	4.33016	1.49002e-05	0.000150312
ENSG00000090238,12	83719	yippee like 3 [Source:HGNC Symbol;Acc:HGNC:18327]	YPEL3	81.4467	-0.529221	0.12223	-4.32972	1.49296e-05	0.000150532
ENSG00000104142,11	57617	VPS18 core subunit of CORVET and HOPS complexes [Source:HGNC Symbol;Acc:HGNC:15972]	VPS18	168.594	-0.419992	0.0970782	-4.32632	1.51619e-05	0.000152796
ENSG00000135749,19	80003	pecanex 2 [Source:HGNC Symbol;Acc:HGNC:8736]	PCNX2	121.903	-0.48112	0.111222	-4.32577	1.52001e-05	0.000153103
ENSG00000111843,14	51522	transmembrane protein 14C [Source:HGNC Symbol;Acc:HGNC:20952]	TMEM14C	364.651	0.279286	0.0646009	4.32325	1.53745e-05	0.000154781
ENSG00000141750,7	342667	SH3 and cysteine rich domain 2 [Source:HGNC Symbol;Acc:HGNC:23990]	STAC2	12.0197	-3.31457	0.766752	-4.32286	1.54016e-05	0.000154974
ENSG00000015676,18	23386	NudC domain containing 3 [Source:HGNC Symbol;Acc:HGNC:22208]	NUDCD3	1107.52	0.180093	0.0416665	4.32226	1.54439e-05	0.000155321
ENSG00000074201,9	1207	chloride nucleotide-sensitive channel 1A [Source:HGNC Symbol;Acc:HGNC:2080]	CLNS1A	732.307	0.246529	0.0570849	4.31864	1.56996e-05	0.000157812
ENSG00000065548,18	55854	zinc finger CCCH-type containing 15 [Source:HGNC Symbol;Acc:HGNC:29528]	ZC3H15	467.146	0.301441	0.0698405	4.31614	1.58784e-05	0.000159528
ENSG00000176171,11	664	BCL2 interacting protein 3 [Source:HGNC Symbol;Acc:HGNC:1084]	BNIP3	368.546	-0.475086	0.110124	-4.3141	1.60255e-05	0.000160924
ENSG00000070413,20	9993	DiGeorge syndrome critical region gene 2 [Source:HGNC Symbol;Acc:HGNC:2845]	DGCR2	584.609	-0.362424	0.0840292	-4.31307	1.61003e-05	0.000161593
ENSG00000123600,19	79828	methyltransferase like 8 [Source:HGNC Symbol;Acc:HGNC:25856]	METTL8	231.737	0.328705	0.0762649	4.31004	1.63224e-05	0.000163739
ENSG00000111912,20	135112	nuclear receptor coactivator 7 [Source:HGNC Symbol;Acc:HGNC:21081]	NCOA7	138.979	0.405093	0.0940066	4.3092	1.63847e-05	0.00016428
ENSG00000123552,17	85015	ubiquitin specific peptidase 45 [Source:HGNC Symbol;Acc:HGNC:20080]	USP45	86.5693	0.468817	0.10886	4.30662	1.65767e-05	0.00016612
ENSG00000125746,16	24139	EMAP like 2 [Source:HGNC Symbol;Acc:HGNC:18035]	EML2	72.1128	-0.556128	0.129137	-4.30649	1.65869e-05	0.000166138
ENSG00000013275,8	5704	proteasome 26S subunit, ATPase 4 [Source:HGNC Symbol;Acc:HGNC:9551]	PSMC4	723.622	0.221698	0.0515013	4.30471	1.67203e-05	0.00016739
ENSG00000180304,14	4947	ornithine decarboxylase antizyme 2 [Source:HGNC Symbol;Acc:HGNC:8096]	OAZ2	450.346	-0.255922	0.0594613	-4.30402	1.67729e-05	0.000167831
ENSG00000137185,12	7746	zinc finger and SCAN domain containing 9 [Source:HGNC Symbol;Acc:HGNC:12984]	ZSCAN9	103.46	0.443632	0.103119	4.30213	1.69162e-05	0.000169179
ENSG00000137494,14	338699	ankyrin repeat domain 42 [Source:HGNC Symbol;Acc:HGNC:26752]	ANKRD42	49.4365	0.583799	0.13571	4.30183	1.69396e-05	0.000169328

## Sheet: Cont-LDHA_Hypo
ensembl_gene_id_version	entrezgene_id	description	external_gene_name	baseMean	log2FoldChange	lfcSE	stat	pvalue	padj
ENSG00000074410,14	771	carbonic anhydrase 12 [Source:HGNC Symbol;Acc:HGNC:1371]	CA12	2378.07	-1.96371	0.039227	-50.0602	0	0
ENSG00000104419,14	10397	N-myc downstream regulated 1 [Source:HGNC Symbol;Acc:HGNC:7679]	NDRG1	1207.81	-3.36174	0.0734564	-45.7651	0	0
ENSG00000106366,8	5054	serpin family E member 1 [Source:HGNC Symbol;Acc:HGNC:8583]	SERPINE1	365.477	-3.52148	0.0760693	-46.2931	0	0
ENSG00000146674,15	3486	insulin like growth factor binding protein 3 [Source:HGNC Symbol;Acc:HGNC:5472]	IGFBP3	3529.12	-3.18083	0.0617979	-51.4714	0	0
ENSG00000187134,14	1645	aldo-keto reductase family 1 member C1 [Source:HGNC Symbol;Acc:HGNC:384]	AKR1C1	443.428	3.23915	0.0824335	39.2942	0	0
ENSG00000131016,17	9590	A-kinase anchoring protein 12 [Source:HGNC Symbol;Acc:HGNC:370]	AKAP12	607.927	-3.82623	0.10767	-35.5365	1.34112e-276	4.88013e-273
ENSG00000114268,12	5210	6-phosphofructo-2-kinase/fructose-2,6-biphosphatase 4 [Source:HGNC Symbol;Acc:HGNC:8875]	PFKFB4	402.292	-1.82146	0.0538493	-33.825	8.45467e-251	2.63701e-247
ENSG00000189060,5	3005	H1 histone family member 0 [Source:HGNC Symbol;Acc:HGNC:4714]	H1F0	1532.32	-1.25022	0.0400793	-31.1937	1.2982e-213	3.54296e-210
ENSG00000151632,17	1646	aldo-keto reductase family 1 member C2 [Source:HGNC Symbol;Acc:HGNC:385]	AKR1C2	204.742	4.64867	0.149066	31.1854	1.68081e-213	4.07745e-210
ENSG00000134333,14	3939	lactate dehydrogenase A [Source:HGNC Symbol;Acc:HGNC:6535]	LDHA	3771.33	1.86653	0.0606732	30.7636	8.04724e-208	1.75695e-204
ENSG00000179776,19	1003	cadherin 5 [Source:HGNC Symbol;Acc:HGNC:1764]	CDH5	222.479	-2.9196	0.0951912	-30.6709	1.39202e-206	2.76291e-203
ENSG00000172020,12	2596	growth associated protein 43 [Source:HGNC Symbol;Acc:HGNC:4140]	GAP43	566.206	-2.35046	0.0770785	-30.4944	3.09574e-204	5.63244e-201
ENSG00000150938,10	51232	cysteine rich transmembrane BMP regulator 1 [Source:HGNC Symbol;Acc:HGNC:2359]	CRIM1	1734.17	-1.13746	0.038175	-29.7961	4.3948e-195	7.3809e-192
ENSG00000134531,10	2012	epithelial membrane protein 1 [Source:HGNC Symbol;Acc:HGNC:3333]	EMP1	375.462	-1.61296	0.057518	-28.0426	4.91037e-173	7.65772e-170
ENSG00000111674,9	2026	enolase 2 [Source:HGNC Symbol;Acc:HGNC:3353]	ENO2	2250.15	-1.16835	0.042096	-27.7544	1.54344e-169	2.24652e-166
ENSG00000133401,16	23037	PDZ domain containing 2 [Source:HGNC Symbol;Acc:HGNC:18486]	PDZD2	480.01	-1.21514	0.0449556	-27.0297	6.6124e-161	9.02303e-158
ENSG00000130164,13	3949	low density lipoprotein receptor [Source:HGNC Symbol;Acc:HGNC:6547]	LDLR	1207.53	-1.18284	0.0442561	-26.7272	2.27438e-157	2.92097e-154
ENSG00000171617,14	8507	ectodermal-neural cortex 1 [Source:HGNC Symbol;Acc:HGNC:3345]	ENC1	2731.64	-1.01155	0.0385055	-26.2704	4.17946e-152	5.06946e-149
ENSG00000131389,17	6533	solute carrier family 6 member 6 [Source:HGNC Symbol;Acc:HGNC:11052]	SLC6A6	133.559	-4.96709	0.19463	-25.5206	1.16321e-143	1.33665e-140
ENSG00000134107,5	8553	basic helix-loop-helix family member e40 [Source:HGNC Symbol;Acc:HGNC:1046]	BHLHE40	840.295	-1.17566	0.0464612	-25.3041	2.87638e-141	3.14e-138
ENSG00000101384,12	182	jagged canonical Notch ligand 1 [Source:HGNC Symbol;Acc:HGNC:6188]	JAG1	1089.79	-1.12901	0.0446955	-25.26	8.80143e-141	9.15055e-138
ENSG00000105220,17	2821	glucose-6-phosphate isomerase [Source:HGNC Symbol;Acc:HGNC:4458]	GPI	1728.7	-1.02224	0.0405667	-25.1991	4.09986e-140	4.06874e-137
ENSG00000163638,13	56999	ADAM metallopeptidase with thrombospondin type 1 motif 9 [Source:HGNC Symbol;Acc:HGNC:13202]	ADAMTS9	910.541	-1.30051	0.0523274	-24.8533	2.37907e-136	2.25836e-133
ENSG00000100234,11	7078	TIMP metallopeptidase inhibitor 3 [Source:HGNC Symbol;Acc:HGNC:11822]	TIMP3	115.33	1.93542	0.0786155	24.6188	7.94674e-134	7.22921e-131
ENSG00000131981,16	3958	galectin 3 [Source:HGNC Symbol;Acc:HGNC:6563]	LGALS3	1662.54	-1.1147	0.046143	-24.1575	6.23188e-129	5.44242e-126
ENSG00000143772,9	3707	inositol-trisphosphate 3-kinase B [Source:HGNC Symbol;Acc:HGNC:6179]	ITPKB	335.555	-1.68707	0.0703973	-23.965	6.44355e-127	5.41085e-124
ENSG00000099250,18	8829	neuropilin 1 [Source:HGNC Symbol;Acc:HGNC:8004]	NRP1	254.394	-2.46414	0.102943	-23.9369	1.26408e-126	1.02217e-123
ENSG00000161638,11	3678	integrin subunit alpha 5 [Source:HGNC Symbol;Acc:HGNC:6141]	ITGA5	219.606	-1.84186	0.0779935	-23.6155	2.67133e-123	2.08297e-120
ENSG00000124942,14	79026	AHNAK nucleoprotein [Source:HGNC Symbol;Acc:HGNC:347]	AHNAK	1332.66	-1.12185	0.0488109	-22.9836	6.8078e-117	5.12533e-114
ENSG00000187498,16	1282	collagen type IV alpha 1 chain [Source:HGNC Symbol;Acc:HGNC:2202]	COL4A1	2255.18	-0.937098	0.0408586	-22.9352	2.07155e-116	1.5076e-113
ENSG00000159399,9	3099	hexokinase 2 [Source:HGNC Symbol;Acc:HGNC:4923]	HK2	1022.85	-0.969152	0.0445193	-21.7693	4.5371e-105	3.19544e-102
ENSG00000041982,16	3371	tenascin C [Source:HGNC Symbol;Acc:HGNC:5318]	TNC	1528.86	-1.00774	0.0463822	-21.727	1.14062e-104	7.78224e-102
ENSG00000005884,18	3675	integrin subunit alpha 3 [Source:HGNC Symbol;Acc:HGNC:6139]	ITGA3	114.211	-2.3645	0.110601	-21.3787	2.1105e-101	1.39632e-98
ENSG00000100311,17	5155	platelet derived growth factor subunit B [Source:HGNC Symbol;Acc:HGNC:8800]	PDGFB	363.783	-1.88717	0.0890161	-21.2003	9.48319e-100	6.0896e-97
ENSG00000059804,16	6515	solute carrier family 2 member 3 [Source:HGNC Symbol;Acc:HGNC:11007]	SLC2A3	867.403	-1.21923	0.0576674	-21.1425	3.23311e-99	2.01681e-96
ENSG00000013588,8	9052	G protein-coupled receptor class C group 5 member A [Source:HGNC Symbol;Acc:HGNC:9836]	GPRC5A	42.0629	-4.24538	0.201696	-21.0485	2.36179e-98	1.43236e-95
ENSG00000156515,23	3098	hexokinase 1 [Source:HGNC Symbol;Acc:HGNC:4922]	HK1	1332.76	-0.925129	0.0441353	-20.9612	1.48299e-97	8.75085e-95
ENSG00000173548,8	257364	sorting nexin 33 [Source:HGNC Symbol;Acc:HGNC:28468]	SNX33	280.988	-1.29203	0.061982	-20.8453	1.68193e-96	9.66355e-94
ENSG00000126785,13	57381	ras homolog family member J [Source:HGNC Symbol;Acc:HGNC:688]	RHOJ	1543.26	0.776504	0.0375705	20.6679	6.73491e-95	3.77034e-92
ENSG00000172893,15	1717	7-dehydrocholesterol reductase [Source:HGNC Symbol;Acc:HGNC:2860]	DHCR7	760.419	-1.3857	0.0675064	-20.527	1.2358e-93	6.74528e-91
ENSG00000183018,9	124976	sphingolipid transporter 2 [Source:HGNC Symbol;Acc:HGNC:26992]	SPNS2	45.4818	-3.2735	0.15978	-20.4876	2.77579e-93	1.47814e-90
ENSG00000115461,5	3488	insulin like growth factor binding protein 5 [Source:HGNC Symbol;Acc:HGNC:5474]	IGFBP5	5328.48	-1.04168	0.0516598	-20.1643	2.01542e-90	1.02332e-87
ENSG00000118257,16	8828	neuropilin 2 [Source:HGNC Symbol;Acc:HGNC:8005]	NRP2	1244.96	-0.879764	0.0436273	-20.1654	1.96971e-90	1.02332e-87
ENSG00000167772,12	51129	angiopoietin like 4 [Source:HGNC Symbol;Acc:HGNC:16039]	ANGPTL4	53.8402	-6.63489	0.330877	-20.0524	1.92208e-89	9.53743e-87
ENSG00000170379,20	285966	TRPM8 channel associated factor 2 [Source:HGNC Symbol;Acc:HGNC:26878]	TCAF2	165.648	-1.62718	0.081388	-19.9929	6.35387e-89	3.08276e-86
ENSG00000125869,10	24141	lysosomal associated membrane protein family member 5 [Source:HGNC Symbol;Acc:HGNC:16097]	LAMP5	208.4	1.55692	0.0780578	19.9457	1.63272e-88	7.74938e-86
ENSG00000155511,18	2890	glutamate ionotropic receptor AMPA type subunit 1 [Source:HGNC Symbol;Acc:HGNC:4571]	GRIA1	168.46	-2.41308	0.121439	-19.8707	7.29899e-88	3.39062e-85
ENSG00000092820,18	7430	ezrin [Source:HGNC Symbol;Acc:HGNC:12691]	EZR	448.697	-1.3057	0.0660136	-19.7792	4.4939e-87	2.04407e-84
ENSG00000128342,5	3976	LIF interleukin 6 family cytokine [Source:HGNC Symbol;Acc:HGNC:6596]	LIF	146.217	-1.88539	0.0953283	-19.7779	4.61871e-87	2.05796e-84
ENSG00000013810,19	10460	transforming acidic coiled-coil containing protein 3 [Source:HGNC Symbol;Acc:HGNC:11524]	TACC3	3072	-1.05791	0.0537191	-19.6933	2.46165e-86	1.0749e-83
ENSG00000109107,14	230	aldolase, fructose-bisphosphate C [Source:HGNC Symbol;Acc:HGNC:418]	ALDOC	94.0503	-1.92503	0.0978541	-19.6724	3.71529e-86	1.59051e-83
ENSG00000117152,13	5999	regulator of G protein signaling 4 [Source:HGNC Symbol;Acc:HGNC:10000]	RGS4	80.7725	-3.41013	0.173724	-19.6295	8.64891e-86	3.63138e-83
ENSG00000130517,14	54858	pyroglutamyl-peptidase I [Source:HGNC Symbol;Acc:HGNC:13568]	PGPEP1	744.05	-0.887895	0.0455438	-19.4954	1.20121e-84	4.94831e-82
ENSG00000142871,17	3491	cellular communication network factor 1 [Source:HGNC Symbol;Acc:HGNC:2654]	CCN1	339.742	-1.56762	0.0806154	-19.4457	3.16984e-84	1.28161e-81
ENSG00000144711,16	9922	IQ motif and Sec7 domain 1 [Source:HGNC Symbol;Acc:HGNC:29112]	IQSEC1	192.607	-1.63223	0.0847233	-19.2655	1.04678e-82	4.15534e-80
ENSG00000117394,23	6513	solute carrier family 2 member 1 [Source:HGNC Symbol;Acc:HGNC:11005]	SLC2A1	1187.73	-0.970151	0.0505315	-19.1989	3.77726e-82	1.47266e-79
ENSG00000079308,19	7145	tensin 1 [Source:HGNC Symbol;Acc:HGNC:11973]	TNS1	216.542	-1.2541	0.0654054	-19.1743	6.07145e-82	2.32558e-79
ENSG00000075426,12	2355	FOS like 2, AP-1 transcription factor subunit [Source:HGNC Symbol;Acc:HGNC:3798]	FOSL2	486.717	-1.07169	0.0561705	-19.0792	3.76215e-81	1.41619e-78
ENSG00000118898,16	5493	periplakin [Source:HGNC Symbol;Acc:HGNC:9273]	PPL	41.6176	-3.50296	0.184955	-18.9395	5.39189e-80	1.99527e-77
ENSG00000087074,8	23645	protein phosphatase 1 regulatory subunit 15A [Source:HGNC Symbol;Acc:HGNC:14375]	PPP1R15A	270.165	-1.43572	0.0758721	-18.9229	7.39275e-80	2.6901e-77
ENSG00000170525,21	5209	6-phosphofructo-2-kinase/fructose-2,6-biphosphatase 3 [Source:HGNC Symbol;Acc:HGNC:8874]	PFKFB3	890.682	-1.00994	0.0536189	-18.8355	3.8661e-79	1.38375e-76
ENSG00000240764,3	56097	protocadherin gamma subfamily C, 5 [Source:HGNC Symbol;Acc:HGNC:8718]	PCDHGC5	527.565	-1.28463	0.0682421	-18.8245	4.75246e-79	1.67355e-76
ENSG00000162490,7	374946	dorsal inhibitory axon guidance protein [Source:HGNC Symbol;Acc:HGNC:25054]	DRAXIN	414.683	-1.35747	0.0726424	-18.687	6.31118e-78	2.18718e-75
ENSG00000245648,2	NA	novel transcript, antisense to KLRK1	AC022075,1	70.5669	2.40443	0.130002	18.4953	2.25228e-76	7.68345e-74
ENSG00000112379,9	57221	ARFGEF family member 3 [Source:HGNC Symbol;Acc:HGNC:21213]	ARFGEF3	195.014	-1.38935	0.0751543	-18.4867	2.64372e-76	8.88005e-74
ENSG00000135245,10	29923	hypoxia inducible lipid droplet associated [Source:HGNC Symbol;Acc:HGNC:28859]	HILPDA	223.817	-2.04656	0.110794	-18.4718	3.48402e-76	1.15253e-73
ENSG00000186918,14	55893	zinc finger protein 395 [Source:HGNC Symbol;Acc:HGNC:18737]	ZNF395	283.232	-1.11535	0.0605705	-18.4141	1.01288e-75	3.30063e-73
ENSG00000054356,14	5798	protein tyrosine phosphatase receptor type N [Source:HGNC Symbol;Acc:HGNC:9676]	PTPRN	48.1684	-2.41445	0.131262	-18.3941	1.46581e-75	4.70634e-73
ENSG00000167306,20	4645	myosin VB [Source:HGNC Symbol;Acc:HGNC:7603]	MYO5B	739.367	-0.870531	0.0473592	-18.3814	1.84967e-75	5.85274e-73
ENSG00000124766,7	6659	SRY-box transcription factor 4 [Source:HGNC Symbol;Acc:HGNC:11200]	SOX4	525.498	1.07328	0.0586863	18.2885	1.02254e-74	3.1893e-72
ENSG00000120875,9	1846	dual specificity phosphatase 4 [Source:HGNC Symbol;Acc:HGNC:3070]	DUSP4	468.92	-0.929947	0.050858	-18.2852	1.08602e-74	3.33959e-72
ENSG00000118785,14	6696	secreted phosphoprotein 1 [Source:HGNC Symbol;Acc:HGNC:11255]	SPP1	346.058	-1.5455	0.084926	-18.1982	5.32908e-74	1.61597e-71
ENSG00000134013,16	4017	lysyl oxidase like 2 [Source:HGNC Symbol;Acc:HGNC:6666]	LOXL2	174.107	-1.34699	0.0740396	-18.1928	5.88298e-74	1.7595e-71
ENSG00000164741,15	10395	DLC1 Rho GTPase activating protein [Source:HGNC Symbol;Acc:HGNC:2897]	DLC1	269.536	-1.32749	0.0732941	-18.1118	2.57101e-73	7.58552e-71
ENSG00000129521,14	112399	egl-9 family hypoxia inducible factor 3 [Source:HGNC Symbol;Acc:HGNC:14661]	EGLN3	133.469	-1.85595	0.102733	-18.0657	5.93541e-73	1.72784e-70
ENSG00000198804,2	4512	mitochondrially encoded cytochrome c oxidase I [Source:HGNC Symbol;Acc:HGNC:7419]	MT-CO1	57267	0.860768	0.048404	17.783	9.57418e-71	2.75044e-68
ENSG00000162981,14	151354	LRAT domain containing 1 [Source:HGNC Symbol;Acc:HGNC:20743]	LRATD1	90.7417	-2.22076	0.125055	-17.7582	1.48886e-70	4.2216e-68
ENSG00000124762,13	1026	cyclin dependent kinase inhibitor 1A [Source:HGNC Symbol;Acc:HGNC:1784]	CDKN1A	613.617	-1.31381	0.0740299	-17.747	1.81665e-70	5.08498e-68
ENSG00000135363,12	4005	LIM domain only 2 [Source:HGNC Symbol;Acc:HGNC:6642]	LMO2	241.955	-1.16394	0.0656841	-17.7202	2.92664e-70	8.08828e-68
ENSG00000124785,9	51299	neuritin 1 [Source:HGNC Symbol;Acc:HGNC:17972]	NRN1	751.957	-1.41721	0.0803485	-17.6383	1.25098e-69	3.41408e-67
ENSG00000198840,2	4537	mitochondrially encoded NADH:ubiquinone oxidoreductase core subunit 3 [Source:HGNC Symbol;Acc:HGNC:7458]	MT-ND3	4306.74	1.01478	0.0580019	17.4957	1.54581e-68	4.16662e-66
ENSG00000116016,14	2034	endothelial PAS domain protein 1 [Source:HGNC Symbol;Acc:HGNC:3374]	EPAS1	509.561	-0.896704	0.0512729	-17.4889	1.74226e-68	4.63889e-66
ENSG00000142949,17	5792	protein tyrosine phosphatase receptor type F [Source:HGNC Symbol;Acc:HGNC:9670]	PTPRF	1058.73	-1.28807	0.0737418	-17.4672	2.54519e-68	6.69508e-66
ENSG00000185950,9	8660	insulin receptor substrate 2 [Source:HGNC Symbol;Acc:HGNC:6126]	IRS2	802.346	-0.7419	0.0425888	-17.4201	5.81016e-68	1.51016e-65
ENSG00000140873,16	170692	ADAM metallopeptidase with thrombospondin type 1 motif 18 [Source:HGNC Symbol;Acc:HGNC:17110]	ADAMTS18	106.559	1.71091	0.098716	17.3316	2.71667e-67	6.978e-65
ENSG00000114480,13	2632	1,4-alpha-glucan branching enzyme 1 [Source:HGNC Symbol;Acc:HGNC:4180]	GBE1	472.027	-1.31115	0.0759276	-17.2684	8.13727e-67	2.06583e-64
ENSG00000178035,12	3615	inosine monophosphate dehydrogenase 2 [Source:HGNC Symbol;Acc:HGNC:6053]	IMPDH2	1735.85	0.597998	0.0347151	17.2259	1.69764e-66	4.26028e-64
ENSG00000136160,17	1910	endothelin receptor type B [Source:HGNC Symbol;Acc:HGNC:3180]	EDNRB	1046.71	1.13148	0.0657765	17.2019	2.56769e-66	6.3705e-64
ENSG00000170485,17	4862	neuronal PAS domain protein 2 [Source:HGNC Symbol;Acc:HGNC:7895]	NPAS2	774.713	-0.931303	0.0541512	-17.1982	2.73903e-66	6.71925e-64
ENSG00000137642,13	6653	sortilin related receptor 1 [Source:HGNC Symbol;Acc:HGNC:11185]	SORL1	937.636	-0.808749	0.0473336	-17.0861	1.88212e-65	4.56581e-63
ENSG00000136010,14	160428	aldehyde dehydrogenase 1 family member L2 [Source:HGNC Symbol;Acc:HGNC:26777]	ALDH1L2	441.288	1.12013	0.0658561	17.0087	7.07318e-65	1.69702e-62
ENSG00000067225,18	5315	pyruvate kinase M1/2 [Source:HGNC Symbol;Acc:HGNC:9021]	PKM	15500.9	-0.645064	0.0380886	-16.9359	2.44687e-64	5.8068e-62
ENSG00000059728,11	4084	MAX dimerization protein 1 [Source:HGNC Symbol;Acc:HGNC:6761]	MXD1	161.519	-1.26746	0.0753795	-16.8144	1.91482e-63	4.49529e-61
ENSG00000154734,15	9510	ADAM metallopeptidase with thrombospondin type 1 motif 1 [Source:HGNC Symbol;Acc:HGNC:217]	ADAMTS1	125.414	-1.453	0.086518	-16.7941	2.69384e-63	6.25688e-61
ENSG00000107159,13	768	carbonic anhydrase 9 [Source:HGNC Symbol;Acc:HGNC:1383]	CA9	76.1167	-1.69714	0.101119	-16.7836	3.21907e-63	7.39809e-61
ENSG00000165478,7	220296	hepatic and glial cell adhesion molecule [Source:HGNC Symbol;Acc:HGNC:26361]	HEPACAM	49.2281	-4.43867	0.265116	-16.7424	6.43763e-63	1.46409e-60
ENSG00000026025,16	7431	vimentin [Source:HGNC Symbol;Acc:HGNC:12692]	VIM	36660.4	-0.615316	0.0368308	-16.7066	1.17404e-62	2.64257e-60
ENSG00000074527,12	59277	netrin 4 [Source:HGNC Symbol;Acc:HGNC:13658]	NTN4	69.1654	2.88407	0.173138	16.6576	2.66587e-62	5.93918e-60
ENSG00000072210,19	224	aldehyde dehydrogenase 3 family member A2 [Source:HGNC Symbol;Acc:HGNC:403]	ALDH3A2	1452.29	-0.759365	0.045724	-16.6076	6.14221e-62	1.35457e-59
ENSG00000108852,14	4355	membrane palmitoylated protein 2 [Source:HGNC Symbol;Acc:HGNC:7220]	MPP2	328.394	-1.11584	0.0673273	-16.5734	1.08457e-61	2.36795e-59
ENSG00000099194,6	6319	stearoyl-CoA desaturase [Source:HGNC Symbol;Acc:HGNC:10571]	SCD	8682.35	-1.07001	0.0645718	-16.5709	1.13074e-61	2.44429e-59
ENSG00000124145,6	6385	syndecan 4 [Source:HGNC Symbol;Acc:HGNC:10661]	SDC4	400.424	-0.928457	0.0562739	-16.4989	3.73609e-61	7.99705e-59
ENSG00000144655,15	64651	cysteine and serine rich nuclear protein 1 [Source:HGNC Symbol;Acc:HGNC:14300]	CSRNP1	125.094	-1.75659	0.108154	-16.2416	2.55991e-59	5.42626e-57
ENSG00000117115,13	11240	peptidyl arginine deiminase 2 [Source:HGNC Symbol;Acc:HGNC:18341]	PADI2	43.6533	-4.09228	0.252295	-16.2202	3.63074e-59	7.62211e-57
ENSG00000104635,14	23516	solute carrier family 39 member 14 [Source:HGNC Symbol;Acc:HGNC:20858]	SLC39A14	598.31	-0.861011	0.0531914	-16.1871	6.22385e-59	1.29415e-56
ENSG00000103888,17	57214	cell migration inducing hyaluronidase 1 [Source:HGNC Symbol;Acc:HGNC:29213]	CEMIP	177.96	-1.56851	0.0969562	-16.1775	7.27152e-59	1.49773e-56
ENSG00000144824,21	90102	pleckstrin homology like domain family B member 2 [Source:HGNC Symbol;Acc:HGNC:29573]	PHLDB2	119.809	1.75255	0.108708	16.1217	1.79707e-58	3.66687e-56
ENSG00000141580,16	56270	WD repeat domain 45B [Source:HGNC Symbol;Acc:HGNC:25072]	WDR45B	1004.71	-0.573819	0.0356151	-16.1117	2.1126e-58	4.27077e-56
ENSG00000107819,13	81855	sideroflexin 3 [Source:HGNC Symbol;Acc:HGNC:16087]	SFXN3	509.338	-0.893358	0.0555083	-16.0941	2.80485e-58	5.61818e-56
ENSG00000168906,13	4144	methionine adenosyltransferase 2A [Source:HGNC Symbol;Acc:HGNC:6904]	MAT2A	2698.58	0.48494	0.0301569	16.0806	3.4912e-58	6.92939e-56
ENSG00000010278,14	928	CD9 molecule [Source:HGNC Symbol;Acc:HGNC:1709]	CD9	2176.71	-0.654865	0.0407564	-16.0678	4.29131e-58	8.44074e-56
ENSG00000187957,8	92737	delta/notch like EGF repeat containing [Source:HGNC Symbol;Acc:HGNC:24456]	DNER	181.598	-1.69251	0.105903	-15.9816	1.71554e-57	3.34423e-55
ENSG00000128641,19	4430	myosin IB [Source:HGNC Symbol;Acc:HGNC:7596]	MYO1B	74.2988	-2.33798	0.146506	-15.9583	2.49356e-57	4.81788e-55
ENSG00000183111,12	389337	Rho guanine nucleotide exchange factor 37 [Source:HGNC Symbol;Acc:HGNC:34430]	ARHGEF37	290.226	-1.10377	0.069376	-15.9099	5.40645e-57	1.03543e-54
ENSG00000128285,4	2847	melanin concentrating hormone receptor 1 [Source:HGNC Symbol;Acc:HGNC:4479]	MCHR1	96.6523	-1.71281	0.108518	-15.7836	4.03585e-56	7.66215e-54
ENSG00000141526,16	9123	solute carrier family 16 member 3 [Source:HGNC Symbol;Acc:HGNC:10924]	SLC16A3	35.6668	-5.26946	0.334513	-15.7526	6.58664e-56	1.23971e-53
ENSG00000261115,6	100507421	transmembrane protein 178B [Source:HGNC Symbol;Acc:HGNC:44112]	TMEM178B	462.659	-0.756825	0.0480754	-15.7424	7.73906e-56	1.44416e-53
ENSG00000058404,20	816	calcium/calmodulin dependent protein kinase II beta [Source:HGNC Symbol;Acc:HGNC:1461]	CAMK2B	169.987	-1.79841	0.114254	-15.7405	7.98542e-56	1.47751e-53
ENSG00000184792,16	23762	oxysterol binding protein 2 [Source:HGNC Symbol;Acc:HGNC:8504]	OSBP2	273.333	-1.15699	0.0737648	-15.6849	1.91825e-55	3.51942e-53
ENSG00000064655,19	2139	EYA transcriptional coactivator and phosphatase 2 [Source:HGNC Symbol;Acc:HGNC:3520]	EYA2	194.923	-1.25683	0.0802509	-15.6612	2.78419e-55	5.06561e-53
ENSG00000228253,1	4509	mitochondrially encoded ATP synthase membrane subunit 8 [Source:HGNC Symbol;Acc:HGNC:7415]	MT-ATP8	2358.62	0.928288	0.0592818	15.6589	2.88815e-55	5.21132e-53
ENSG00000038427,16	1462	versican [Source:HGNC Symbol;Acc:HGNC:2464]	VCAN	2495.32	0.750864	0.0480644	15.622	5.15274e-55	9.22129e-53
ENSG00000164970,15	203259	family with sequence similarity 219 member A [Source:HGNC Symbol;Acc:HGNC:19920]	FAM219A	163.245	-1.37974	0.0885658	-15.5787	1.01544e-54	1.80244e-52
ENSG00000083444,17	5351	procollagen-lysine,2-oxoglutarate 5-dioxygenase 1 [Source:HGNC Symbol;Acc:HGNC:9081]	PLOD1	1134.81	-0.957106	0.0615968	-15.5382	1.91135e-54	3.36536e-52
ENSG00000163947,11	50650	Rho guanine nucleotide exchange factor 3 [Source:HGNC Symbol;Acc:HGNC:683]	ARHGEF3	321.687	-1.16472	0.0750056	-15.5285	2.22593e-54	3.88791e-52
ENSG00000156030,13	91748	ELM2 and Myb/SANT domain containing 1 [Source:HGNC Symbol;Acc:HGNC:19853]	ELMSAN1	420.905	-0.903801	0.0582333	-15.5203	2.5271e-54	4.3789e-52
ENSG00000182463,16	128553	teashirt zinc finger homeobox 2 [Source:HGNC Symbol;Acc:HGNC:13010]	TSHZ2	283.593	-1.00671	0.0651731	-15.4467	7.94368e-54	1.36563e-51
ENSG00000134769,21	1837	dystrobrevin alpha [Source:HGNC Symbol;Acc:HGNC:3057]	DTNA	628.315	-0.787436	0.0510171	-15.4348	9.55483e-54	1.62977e-51
ENSG00000143195,13	387597	immunoglobulin like domain containing receptor 2 [Source:HGNC Symbol;Acc:HGNC:18131]	ILDR2	333.632	1.15262	0.0748539	15.3982	1.68269e-53	2.84793e-51
ENSG00000182534,13	439921	matrix remodeling associated 7 [Source:HGNC Symbol;Acc:HGNC:7541]	MXRA7	973.601	-0.926381	0.0601662	-15.3971	1.71298e-53	2.87689e-51
ENSG00000118900,15	29855	ubinuclein 1 [Source:HGNC Symbol;Acc:HGNC:12506]	UBN1	656.827	-0.719954	0.0468282	-15.3744	2.43197e-53	4.05323e-51
ENSG00000120738,8	1958	early growth response 1 [Source:HGNC Symbol;Acc:HGNC:3238]	EGR1	469.862	-1.19326	0.0777461	-15.3482	3.64221e-53	6.02427e-51
ENSG00000233705,7	NA	SLC26A4 antisense RNA 1 [Source:HGNC Symbol;Acc:HGNC:22385]	SLC26A4-AS1	48.0228	3.98736	0.260033	15.3341	4.52609e-53	7.42994e-51
ENSG00000197930,13	30001	endoplasmic reticulum oxidoreductase 1 alpha [Source:HGNC Symbol;Acc:HGNC:13280]	ERO1A	758.452	-1.23218	0.0803617	-15.3329	4.60753e-53	7.50718e-51
ENSG00000181019,13	1728	NAD(P)H quinone dehydrogenase 1 [Source:HGNC Symbol;Acc:HGNC:2874]	NQO1	755.09	-1.10839	0.0725398	-15.2798	1.04301e-52	1.68681e-50
ENSG00000205221,12	5212	vitrin [Source:HGNC Symbol;Acc:HGNC:12697]	VIT	33.6802	3.31792	0.217674	15.2426	1.84314e-52	2.95891e-50
ENSG00000187193,9	4501	metallothionein 1X [Source:HGNC Symbol;Acc:HGNC:7405]	MT1X	42.3351	-2.92433	0.192382	-15.2006	3.50299e-52	5.58254e-50
ENSG00000145730,20	5066	peptidylglycine alpha-amidating monooxygenase [Source:HGNC Symbol;Acc:HGNC:8596]	PAM	1637.12	-0.889916	0.0586364	-15.1768	5.0341e-52	7.96446e-50
ENSG00000127946,17	3092	huntingtin interacting protein 1 [Source:HGNC Symbol;Acc:HGNC:4913]	HIP1	2696.73	-0.58672	0.0387096	-15.1569	6.81624e-52	1.07064e-49
ENSG00000177606,7	3725	Jun proto-oncogene, AP-1 transcription factor subunit [Source:HGNC Symbol;Acc:HGNC:6204]	JUN	2217.66	-1.08799	0.0719275	-15.1262	1.08789e-51	1.69656e-49
ENSG00000140105,18	7453	tryptophanyl-tRNA synthetase [Source:HGNC Symbol;Acc:HGNC:12729]	WARS	1183.72	0.806059	0.0533211	15.1171	1.24989e-51	1.93538e-49
ENSG00000155111,15	23097	cyclin dependent kinase 19 [Source:HGNC Symbol;Acc:HGNC:19338]	CDK19	504.035	-0.917945	0.0610753	-15.0297	4.68988e-51	7.21086e-49
ENSG00000198712,1	4513	mitochondrially encoded cytochrome c oxidase II [Source:HGNC Symbol;Acc:HGNC:7421]	MT-CO2	43585	0.820561	0.0546756	15.0078	6.52642e-51	9.96443e-49
ENSG00000248323,7	NA	lung cancer associated transcript 1 [Source:HGNC Symbol;Acc:HGNC:48498]	LUCAT1	33.3415	-3.02329	0.202642	-14.9193	2.46754e-50	3.74124e-48
ENSG00000122584,13	30010	neurexophilin 1 [Source:HGNC Symbol;Acc:HGNC:20693]	NXPH1	235.84	1.04708	0.0703166	14.891	3.77117e-50	5.67834e-48
ENSG00000159167,12	6781	stanniocalcin 1 [Source:HGNC Symbol;Acc:HGNC:11373]	STC1	1009.57	-1.09957	0.0738502	-14.8892	3.87522e-50	5.79505e-48
ENSG00000163531,15	23114	neurofascin [Source:HGNC Symbol;Acc:HGNC:29866]	NFASC	386.05	-1.14046	0.0768843	-14.8335	8.90005e-50	1.32187e-47
ENSG00000128849,10	84952	cingulin like 1 [Source:HGNC Symbol;Acc:HGNC:25931]	CGNL1	199.596	-1.17947	0.0796191	-14.814	1.19016e-49	1.75573e-47
ENSG00000079691,18	55604	capping protein regulator and myosin 1 linker 1 [Source:HGNC Symbol;Acc:HGNC:21581]	CARMIL1	263.384	1.20558	0.081431	14.805	1.36058e-49	1.99365e-47
ENSG00000196526,10	60312	actin filament associated protein 1 [Source:HGNC Symbol;Acc:HGNC:24017]	AFAP1	347.206	-0.804397	0.0545011	-14.7593	2.68097e-49	3.90224e-47
ENSG00000116133,13	1718	24-dehydrocholesterol reductase [Source:HGNC Symbol;Acc:HGNC:2859]	DHCR24	2386.17	-0.639656	0.0433911	-14.7416	3.48331e-49	5.03649e-47
ENSG00000109917,11	8882	ZPR1 zinc finger [Source:HGNC Symbol;Acc:HGNC:13051]	ZPR1	333.867	0.825975	0.0560834	14.7276	4.28491e-49	6.15477e-47
ENSG00000203875,12	NA	small nucleolar RNA host gene 5 [Source:HGNC Symbol;Acc:HGNC:21026]	SNHG5	477.242	0.858308	0.0582888	14.7251	4.44882e-49	6.34844e-47
ENSG00000151929,9	9531	BCL2 associated athanogene 3 [Source:HGNC Symbol;Acc:HGNC:939]	BAG3	154.528	-1.29822	0.0882136	-14.7168	5.02628e-49	7.1259e-47
ENSG00000171388,12	8862	apelin [Source:HGNC Symbol;Acc:HGNC:16665]	APLN	115.311	-1.25979	0.0858027	-14.6824	8.35513e-49	1.17689e-46
ENSG00000177511,6	51046	ST8 alpha-N-acetyl-neuraminide alpha-2,8-sialyltransferase 3 [Source:HGNC Symbol;Acc:HGNC:14269]	ST8SIA3	400.764	-1.13746	0.0775812	-14.6616	1.1357e-48	1.58947e-46
ENSG00000186187,12	84937	zinc and ring finger 1 [Source:HGNC Symbol;Acc:HGNC:18452]	ZNRF1	233.071	-1.04684	0.0718667	-14.5665	4.59087e-48	6.38423e-46
ENSG00000136830,12	64855	niban apoptosis regulator 2 [Source:HGNC Symbol;Acc:HGNC:25282]	NIBAN2	181.926	-1.4407	0.0994314	-14.4894	1.41382e-47	1.95366e-45
ENSG00000198910,14	3897	L1 cell adhesion molecule [Source:HGNC Symbol;Acc:HGNC:6470]	L1CAM	802.866	-1.1111	0.0767589	-14.4752	1.7394e-47	2.38845e-45
ENSG00000177301,15	3737	potassium voltage-gated channel subfamily A member 2 [Source:HGNC Symbol;Acc:HGNC:6220]	KCNA2	1233.78	0.679566	0.0469761	14.4662	1.98077e-47	2.70289e-45
ENSG00000198695,2	4541	mitochondrially encoded NADH:ubiquinone oxidoreductase core subunit 6 [Source:HGNC Symbol;Acc:HGNC:7462]	MT-ND6	7295.88	0.998856	0.0690801	14.4594	2.18707e-47	2.96585e-45
ENSG00000197872,11	81553	family with sequence similarity 49 member A [Source:HGNC Symbol;Acc:HGNC:25373]	FAM49A	338.334	-1.04675	0.0724884	-14.4402	2.89114e-47	3.89644e-45
ENSG00000163235,16	7039	transforming growth factor alpha [Source:HGNC Symbol;Acc:HGNC:11765]	TGFA	179.068	-1.29736	0.0898758	-14.435	3.11758e-47	4.17584e-45
ENSG00000162772,17	467	activating transcription factor 3 [Source:HGNC Symbol;Acc:HGNC:785]	ATF3	159.119	-1.13679	0.0789841	-14.3926	5.75886e-47	7.66665e-45
ENSG00000159784,17	9715	family with sequence similarity 131 member B [Source:HGNC Symbol;Acc:HGNC:22202]	FAM131B	850.432	-0.699455	0.048631	-14.3829	6.62384e-47	8.76475e-45
ENSG00000157654,18	445815	PALM2-AKAP2 fusion [Source:HGNC Symbol;Acc:HGNC:33529]	PALM2-AKAP2	626.78	-0.8014	0.0557485	-14.3753	7.39842e-47	9.7307e-45
ENSG00000108602,18	218	aldehyde dehydrogenase 3 family member A1 [Source:HGNC Symbol;Acc:HGNC:405]	ALDH3A1	178.384	-1.47724	0.103	-14.3421	1.19458e-46	1.56175e-44
ENSG00000072682,18	8974	prolyl 4-hydroxylase subunit alpha 2 [Source:HGNC Symbol;Acc:HGNC:8547]	P4HA2	182.062	-1.08836	0.075996	-14.3213	1.61163e-46	2.09445e-44
ENSG00000185022,12	23764	MAF bZIP transcription factor F [Source:HGNC Symbol;Acc:HGNC:6780]	MAFF	39.0463	-2.30764	0.161378	-14.2996	2.19955e-46	2.84158e-44
ENSG00000103966,11	30844	EH domain containing 4 [Source:HGNC Symbol;Acc:HGNC:3245]	EHD4	80.7697	-2.04617	0.143122	-14.2967	2.29496e-46	2.94741e-44
ENSG00000198727,2	4519	mitochondrially encoded cytochrome b [Source:HGNC Symbol;Acc:HGNC:7427]	MT-CYB	39893.5	0.757998	0.0530546	14.2871	2.63232e-46	3.36091e-44
ENSG00000101680,15	284217	laminin subunit alpha 1 [Source:HGNC Symbol;Acc:HGNC:6481]	LAMA1	53.264	-2.04651	0.143572	-14.2543	4.21774e-46	5.35383e-44
ENSG00000152578,13	2893	glutamate ionotropic receptor AMPA type subunit 4 [Source:HGNC Symbol;Acc:HGNC:4574]	GRIA4	450.661	1.08258	0.0759786	14.2485	4.58215e-46	5.78277e-44
ENSG00000152049,6	23704	potassium voltage-gated channel subfamily E regulatory subunit 4 [Source:HGNC Symbol;Acc:HGNC:6244]	KCNE4	548.467	-0.763216	0.053684	-14.2168	7.2049e-46	9.04049e-44
ENSG00000235831,7	NA	BHLHE40 antisense RNA 1 [Source:HGNC Symbol;Acc:HGNC:44471]	BHLHE40-AS1	106.132	-1.19167	0.0838893	-14.2053	8.49674e-46	1.06005e-43
ENSG00000140961,14	29948	oxidative stress induced growth inhibitor 1 [Source:HGNC Symbol;Acc:HGNC:30093]	OSGIN1	38.7048	-3.20178	0.226196	-14.1549	1.74297e-45	2.16217e-43
ENSG00000114023,15	26355	family with sequence similarity 162 member A [Source:HGNC Symbol;Acc:HGNC:17865]	FAM162A	676.348	-1.04519	0.0738653	-14.1499	1.87017e-45	2.30686e-43
ENSG00000035862,12	7077	TIMP metallopeptidase inhibitor 2 [Source:HGNC Symbol;Acc:HGNC:11821]	TIMP2	2788.39	-0.61795	0.0437538	-14.1234	2.72667e-45	3.34446e-43
ENSG00000154678,18	5137	phosphodiesterase 1C [Source:HGNC Symbol;Acc:HGNC:8776]	PDE1C	645.89	-0.97601	0.0691676	-14.1108	3.25884e-45	3.97487e-43
ENSG00000204624,8	57540	dispatched RND transporter family member 3 [Source:HGNC Symbol;Acc:HGNC:29251]	DISP3	191.947	-1.94826	0.1383	-14.0872	4.55363e-45	5.5233e-43
ENSG00000196139,14	8644	aldo-keto reductase family 1 member C3 [Source:HGNC Symbol;Acc:HGNC:386]	AKR1C3	62.4008	2.04788	0.145772	14.0485	7.86343e-45	9.48521e-43
ENSG00000265972,6	10628	thioredoxin interacting protein [Source:HGNC Symbol;Acc:HGNC:16952]	TXNIP	3972.1	-0.538147	0.0383139	-14.0458	8.1795e-45	9.81225e-43
ENSG00000100292,17	3162	heme oxygenase 1 [Source:HGNC Symbol;Acc:HGNC:5013]	HMOX1	64.4751	-2.08376	0.148751	-14.0084	1.38539e-44	1.64454e-42
ENSG00000173281,5	79660	protein phosphatase 1 regulatory subunit 3B [Source:HGNC Symbol;Acc:HGNC:14942]	PPP1R3B	180.172	-1.20798	0.0862332	-14.0083	1.38595e-44	1.64454e-42
ENSG00000234745,11	3106	major histocompatibility complex, class I, B [Source:HGNC Symbol;Acc:HGNC:4932]	HLA-B	486.649	-1.00604	0.0719071	-13.9908	1.77418e-44	2.09382e-42
ENSG00000137266,14	63027	solute carrier family 22 member 23 [Source:HGNC Symbol;Acc:HGNC:21106]	SLC22A23	293.193	-0.91638	0.0655523	-13.9794	2.08307e-44	2.44514e-42
ENSG00000173918,15	114897	C1q and TNF related 1 [Source:HGNC Symbol;Acc:HGNC:14324]	C1QTNF1	69.8798	-2.31039	0.165457	-13.9637	2.59615e-44	3.03111e-42
ENSG00000198786,2	4540	mitochondrially encoded NADH:ubiquinone oxidoreductase core subunit 5 [Source:HGNC Symbol;Acc:HGNC:7461]	MT-ND5	31243.4	0.948749	0.0683081	13.8893	7.35813e-44	8.54522e-42
ENSG00000197380,11	147906	dishevelled binding antagonist of beta catenin 3 [Source:HGNC Symbol;Acc:HGNC:30745]	DACT3	235.936	-0.949718	0.068463	-13.872	9.3638e-44	1.08169e-41
ENSG00000101134,12	55816	docking protein 5 [Source:HGNC Symbol;Acc:HGNC:16173]	DOK5	481.289	-1.01358	0.0732977	-13.8283	1.72066e-43	1.97722e-41
ENSG00000163931,16	7086	transketolase [Source:HGNC Symbol;Acc:HGNC:11834]	TKT	1789.65	-0.851053	0.061631	-13.8089	2.25388e-43	2.57638e-41
ENSG00000112715,22	7422	vascular endothelial growth factor A [Source:HGNC Symbol;Acc:HGNC:12680]	VEGFA	5019.93	-0.673775	0.0490185	-13.7453	5.43243e-43	6.17741e-41
ENSG00000185567,7	113146	AHNAK nucleoprotein 2 [Source:HGNC Symbol;Acc:HGNC:20125]	AHNAK2	265.439	-1.2507	0.0912604	-13.7047	9.51316e-43	1.07617e-40
ENSG00000113083,14	4015	lysyl oxidase [Source:HGNC Symbol;Acc:HGNC:6664]	LOX	111.047	-1.58129	0.115593	-13.6798	1.34017e-42	1.50825e-40
ENSG00000089169,15	22895	rabphilin 3A [Source:HGNC Symbol;Acc:HGNC:17056]	RPH3A	1305.98	-0.680158	0.0497749	-13.6647	1.65048e-42	1.84795e-40
ENSG00000145901,15	10318	TNFAIP3 interacting protein 1 [Source:HGNC Symbol;Acc:HGNC:16903]	TNIP1	323.509	-0.926343	0.0679262	-13.6375	2.39715e-42	2.67026e-40
ENSG00000135069,14	29968	phosphoserine aminotransferase 1 [Source:HGNC Symbol;Acc:HGNC:19129]	PSAT1	1165.27	0.789295	0.0579248	13.6262	2.79838e-42	3.10138e-40
ENSG00000049246,14	8863	period circadian regulator 3 [Source:HGNC Symbol;Acc:HGNC:8847]	PER3	582.589	-0.624317	0.045937	-13.5907	4.54599e-42	5.01276e-40
ENSG00000157617,17	25966	C2 calcium dependent domain containing 2 [Source:HGNC Symbol;Acc:HGNC:1266]	C2CD2	92.4483	-1.52973	0.112648	-13.5797	5.28449e-42	5.7978e-40
ENSG00000108018,15	114815	sortilin related VPS10 domain containing receptor 1 [Source:HGNC Symbol;Acc:HGNC:16697]	SORCS1	173.677	-1.62229	0.119618	-13.5622	6.70558e-42	7.32015e-40
ENSG00000197747,9	6281	S100 calcium binding protein A10 [Source:HGNC Symbol;Acc:HGNC:10487]	S100A10	1034.75	-0.874344	0.0646491	-13.5245	1.12169e-41	1.2184e-39
ENSG00000212907,2	4539	mitochondrially encoded NADH:ubiquinone oxidoreductase core subunit 4L [Source:HGNC Symbol;Acc:HGNC:7460]	MT-ND4L	7848.11	0.704608	0.0521818	13.5029	1.5025e-41	1.62396e-39
ENSG00000170345,10	2353	Fos proto-oncogene, AP-1 transcription factor subunit [Source:HGNC Symbol;Acc:HGNC:3796]	FOS	191.039	-1.16695	0.0864831	-13.4934	1.71132e-41	1.84056e-39
ENSG00000130821,16	6535	solute carrier family 6 member 8 [Source:HGNC Symbol;Acc:HGNC:11055]	SLC6A8	691.079	-0.825632	0.0612148	-13.4875	1.85356e-41	1.98376e-39
ENSG00000145623,13	9180	oncostatin M receptor [Source:HGNC Symbol;Acc:HGNC:8507]	OSMR	755.211	-0.825745	0.0612732	-13.4764	2.15237e-41	2.29233e-39
ENSG00000137203,12	7020	transcription factor AP-2 alpha [Source:HGNC Symbol;Acc:HGNC:11742]	TFAP2A	256.468	0.82904	0.0615234	13.4752	2.18852e-41	2.31951e-39
ENSG00000109861,16	1075	cathepsin C [Source:HGNC Symbol;Acc:HGNC:2528]	CTSC	129.083	1.00881	0.0748713	13.4739	2.22731e-41	2.34922e-39
ENSG00000151025,11	57512	G protein-coupled receptor 158 [Source:HGNC Symbol;Acc:HGNC:23689]	GPR158	65.3209	-2.20813	0.164316	-13.4384	3.60376e-41	3.78274e-39
ENSG00000134954,14	2113	ETS proto-oncogene 1, transcription factor [Source:HGNC Symbol;Acc:HGNC:3488]	ETS1	417.28	-0.8379	0.0623864	-13.4308	3.99023e-41	4.16835e-39
ENSG00000106772,18	158471	prune homolog 2 with BCH domain [Source:HGNC Symbol;Acc:HGNC:25209]	PRUNE2	267.724	-0.910455	0.067912	-13.4064	5.54761e-41	5.76766e-39
ENSG00000105835,12	10135	nicotinamide phosphoribosyltransferase [Source:HGNC Symbol;Acc:HGNC:30092]	NAMPT	518.947	-1.02744	0.0766578	-13.4029	5.81113e-41	6.013e-39
ENSG00000113070,8	1839	heparin binding EGF like growth factor [Source:HGNC Symbol;Acc:HGNC:3059]	HBEGF	70.3963	-2.23296	0.166668	-13.3977	6.23763e-41	6.42388e-39
ENSG00000162804,14	25992	sushi, nidogen and EGF like domains 1 [Source:HGNC Symbol;Acc:HGNC:24696]	SNED1	318.875	1.01014	0.0754067	13.3959	6.38912e-41	6.549e-39
ENSG00000111885,7	4121	mannosidase alpha class 1A member 1 [Source:HGNC Symbol;Acc:HGNC:6821]	MAN1A1	266.019	-1.18867	0.0887483	-13.3937	6.57797e-41	6.71107e-39
ENSG00000101210,12	1917	eukaryotic translation elongation factor 1 alpha 2 [Source:HGNC Symbol;Acc:HGNC:3192]	EEF1A2	1018.12	-1.50263	0.112258	-13.3855	7.35067e-41	7.46452e-39
ENSG00000101638,13	29906	ST8 alpha-N-acetyl-neuraminide alpha-2,8-sialyltransferase 5 [Source:HGNC Symbol;Acc:HGNC:17827]	ST8SIA5	4571.45	-0.449276	0.0335862	-13.3768	8.26056e-41	8.34967e-39
ENSG00000166833,21	89797	neuron navigator 2 [Source:HGNC Symbol;Acc:HGNC:15997]	NAV2	598.362	-0.68226	0.0510616	-13.3615	1.0146e-40	1.02081e-38
ENSG00000144057,15	84620	ST6 beta-galactoside alpha-2,6-sialyltransferase 2 [Source:HGNC Symbol;Acc:HGNC:10861]	ST6GAL2	75.6849	1.58149	0.118369	13.3607	1.02583e-40	1.02738e-38
ENSG00000097007,19	25	ABL proto-oncogene 1, non-receptor tyrosine kinase [Source:HGNC Symbol;Acc:HGNC:76]	ABL1	664.247	-0.744646	0.0557766	-13.3505	1.17627e-40	1.17267e-38
ENSG00000158710,14	8407	transgelin 2 [Source:HGNC Symbol;Acc:HGNC:11554]	TAGLN2	1456.55	-0.703974	0.0527552	-13.3442	1.28101e-40	1.27129e-38
ENSG00000221866,9	91584	plexin A4 [Source:HGNC Symbol;Acc:HGNC:9102]	PLXNA4	512.602	-0.919022	0.0688726	-13.3438	1.28753e-40	1.27198e-38
ENSG00000165474,8	2706	gap junction protein beta 2 [Source:HGNC Symbol;Acc:HGNC:4284]	GJB2	27.7987	-3.28552	0.24639	-13.3347	1.45532e-40	1.43127e-38
ENSG00000158186,13	22808	muscle RAS oncogene homolog [Source:HGNC Symbol;Acc:HGNC:7227]	MRAS	149.109	-1.24005	0.0933056	-13.2902	2.64013e-40	2.58485e-38
ENSG00000115306,16	6711	spectrin beta, non-erythrocytic 1 [Source:HGNC Symbol;Acc:HGNC:11275]	SPTBN1	3423.82	-0.454121	0.0343143	-13.2342	5.57183e-40	5.4308e-38
ENSG00000117139,17	10765	lysine demethylase 5B [Source:HGNC Symbol;Acc:HGNC:18039]	KDM5B	515.831	-0.869241	0.0656842	-13.2336	5.61154e-40	5.44519e-38
ENSG00000225630,1	NA	MT-ND2 pseudogene 28 [Source:HGNC Symbol;Acc:HGNC:42129]	MTND2P28	638.226	0.778947	0.0588798	13.2295	5.93148e-40	5.73018e-38
ENSG00000104812,15	2997	glycogen synthase 1 [Source:HGNC Symbol;Acc:HGNC:4706]	GYS1	427.609	-0.980917	0.0743679	-13.1901	1.00106e-39	9.6283e-38
ENSG00000109971,14	3312	heat shock protein family A (Hsp70) member 8 [Source:HGNC Symbol;Acc:HGNC:5241]	HSPA8	12904.3	0.681938	0.0517504	13.1774	1.18346e-39	1.13326e-37
ENSG00000073792,15	10644	insulin like growth factor 2 mRNA binding protein 2 [Source:HGNC Symbol;Acc:HGNC:28867]	IGF2BP2	310.976	-0.753085	0.0572904	-13.145	1.81698e-39	1.73232e-37
ENSG00000139970,17	6252	reticulon 1 [Source:HGNC Symbol;Acc:HGNC:10467]	RTN1	1326.67	-0.654905	0.049839	-13.1404	1.9319e-39	1.83388e-37
ENSG00000092964,18	1808	dihydropyrimidinase like 2 [Source:HGNC Symbol;Acc:HGNC:3014]	DPYSL2	1519.61	-0.579165	0.0440892	-13.1362	2.04212e-39	1.93011e-37
ENSG00000079459,13	2222	farnesyl-diphosphate farnesyltransferase 1 [Source:HGNC Symbol;Acc:HGNC:3629]	FDFT1	1457.95	-0.702967	0.0538378	-13.0571	5.78832e-39	5.44726e-37
ENSG00000156232,7	123720	WASP homolog associated with actin, golgi membranes and microtubules [Source:HGNC Symbol;Acc:HGNC:30493]	WHAMM	292.952	-0.878186	0.0674448	-13.0208	9.31782e-39	8.73115e-37
ENSG00000118523,6	1490	cellular communication network factor 2 [Source:HGNC Symbol;Acc:HGNC:2500]	CCN2	107.167	-1.49212	0.114928	-12.9831	1.52598e-38	1.42379e-36
ENSG00000124702,18	116138	kelch domain containing 3 [Source:HGNC Symbol;Acc:HGNC:20704]	KLHDC3	542.155	0.628538	0.0485127	12.9561	2.16864e-38	2.01481e-36
ENSG00000123095,6	79365	basic helix-loop-helix family member e41 [Source:HGNC Symbol;Acc:HGNC:16617]	BHLHE41	128.771	-1.09933	0.0849499	-12.9409	2.64416e-38	2.44619e-36
ENSG00000143786,8	149111	cornichon family AMPA receptor auxiliary protein 3 [Source:HGNC Symbol;Acc:HGNC:26802]	CNIH3	116.067	-1.55977	0.120644	-12.9286	3.10239e-38	2.858e-36
ENSG00000117707,16	5629	prospero homeobox 1 [Source:HGNC Symbol;Acc:HGNC:9459]	PROX1	496.913	-0.805197	0.0623192	-12.9205	3.44706e-38	3.16217e-36
ENSG00000134986,13	9315	neuronal regeneration related protein [Source:HGNC Symbol;Acc:HGNC:16834]	NREP	374.44	0.703982	0.054558	12.9034	4.30858e-38	3.93595e-36
ENSG00000184371,14	1435	colony stimulating factor 1 [Source:HGNC Symbol;Acc:HGNC:2432]	CSF1	345.667	-1.06506	0.0825631	-12.8999	4.50544e-38	4.09864e-36
ENSG00000100591,8	10598	activator of HSP90 ATPase activity 1 [Source:HGNC Symbol;Acc:HGNC:1189]	AHSA1	557.093	0.670625	0.0520337	12.8883	5.24093e-38	4.74793e-36
ENSG00000105767,3	199731	cell adhesion molecule 4 [Source:HGNC Symbol;Acc:HGNC:30825]	CADM4	539.054	-0.764546	0.0593365	-12.8849	5.47363e-38	4.93825e-36
ENSG00000107984,10	22943	dickkopf WNT signaling pathway inhibitor 1 [Source:HGNC Symbol;Acc:HGNC:2891]	DKK1	189.121	-1.15118	0.0895251	-12.8587	7.68341e-38	6.90337e-36
ENSG00000198763,3	4536	mitochondrially encoded NADH:ubiquinone oxidoreductase core subunit 2 [Source:HGNC Symbol;Acc:HGNC:7456]	MT-ND2	18320.1	0.785346	0.0612636	12.8191	1.28153e-37	1.1467e-35
ENSG00000269926,1	NA	DDIT4 antisense RNA 1 [Source:HGNC Symbol;Acc:HGNC:52379]	DDIT4-AS1	1184.48	-0.799981	0.0624351	-12.813	1.38684e-37	1.23587e-35
ENSG00000101577,9	9663	lipin 2 [Source:HGNC Symbol;Acc:HGNC:14450]	LPIN2	590.91	-0.579884	0.0452744	-12.8082	1.47495e-37	1.30905e-35
ENSG00000198431,16	7296	thioredoxin reductase 1 [Source:HGNC Symbol;Acc:HGNC:12437]	TXNRD1	1313.15	-0.692571	0.0541318	-12.7942	1.76751e-37	1.56235e-35
ENSG00000142864,14	26135	SERPINE1 mRNA binding protein 1 [Source:HGNC Symbol;Acc:HGNC:17860]	SERBP1	1936.49	0.542626	0.0424584	12.7802	2.11562e-37	1.86252e-35
ENSG00000185633,10	56901	NDUFA4 mitochondrial complex associated like 2 [Source:HGNC Symbol;Acc:HGNC:29836]	NDUFA4L2	114.694	-2.59464	0.203143	-12.7725	2.33524e-37	2.0476e-35
ENSG00000248527,1	NA	MT-ATP6 pseudogene 1 [Source:HGNC Symbol;Acc:HGNC:44575]	MTATP6P1	2404.21	0.84852	0.0666582	12.7294	4.05903e-37	3.54483e-35
ENSG00000061337,15	11178	leucine zipper tumor suppressor 1 [Source:HGNC Symbol;Acc:HGNC:13861]	LZTS1	645.25	-1.08307	0.0851984	-12.7123	5.0539e-37	4.39609e-35
ENSG00000046604,13	1829	desmoglein 2 [Source:HGNC Symbol;Acc:HGNC:3049]	DSG2	55.3231	-1.53521	0.120825	-12.7061	5.46846e-37	4.73781e-35
ENSG00000138166,6	1847	dual specificity phosphatase 5 [Source:HGNC Symbol;Acc:HGNC:3071]	DUSP5	117.046	-1.1366	0.0895276	-12.6955	6.26257e-37	5.40437e-35
ENSG00000163872,16	55689	YEATS domain containing 2 [Source:HGNC Symbol;Acc:HGNC:25489]	YEATS2	992.684	-0.497559	0.0393082	-12.6579	1.01172e-36	8.6964e-35
ENSG00000145794,17	84466	multiple EGF like domains 10 [Source:HGNC Symbol;Acc:HGNC:29634]	MEGF10	588.39	0.898244	0.0709848	12.654	1.06274e-36	9.09911e-35
ENSG00000183255,12	754	PTTG1 interacting protein [Source:HGNC Symbol;Acc:HGNC:13524]	PTTG1IP	1412.01	-0.411114	0.032493	-12.6524	1.08552e-36	9.25789e-35
ENSG00000108592,17	117246	FtsJ RNA 2'-O-methyltransferase 3 [Source:HGNC Symbol;Acc:HGNC:17136]	FTSJ3	785.372	0.601235	0.047554	12.6432	1.2195e-36	1.036e-34
ENSG00000240694,9	10687	PNMA family member 2 [Source:HGNC Symbol;Acc:HGNC:9159]	PNMA2	1657.18	-0.46507	0.0368172	-12.6319	1.40857e-36	1.19199e-34
ENSG00000119938,9	5507	protein phosphatase 1 regulatory subunit 3C [Source:HGNC Symbol;Acc:HGNC:9293]	PPP1R3C	414.053	-0.941709	0.0746318	-12.6181	1.67904e-36	1.41539e-34
ENSG00000102317,18	5935	RNA binding motif protein 3 [Source:HGNC Symbol;Acc:HGNC:9900]	RBM3	1162.5	0.510775	0.0404841	12.6167	1.70852e-36	1.4347e-34
ENSG00000175928,6	57633	leucine rich repeat neuronal 1 [Source:HGNC Symbol;Acc:HGNC:20980]	LRRN1	423.961	0.935191	0.0741919	12.605	1.98114e-36	1.65725e-34
ENSG00000147065,17	4478	moesin [Source:HGNC Symbol;Acc:HGNC:7373]	MSN	3871.32	-0.504729	0.0400564	-12.6005	2.09914e-36	1.74926e-34
ENSG00000178573,7	4094	MAF bZIP transcription factor [Source:HGNC Symbol;Acc:HGNC:6776]	MAF	141.788	-1.08369	0.086051	-12.5936	2.29099e-36	1.90187e-34
ENSG00000087086,15	2512	ferritin light chain [Source:HGNC Symbol;Acc:HGNC:3999]	FTL	2929.95	-0.784275	0.0623433	-12.5799	2.72202e-36	2.25113e-34
ENSG00000107249,23	169792	GLIS family zinc finger 3 [Source:HGNC Symbol;Acc:HGNC:28510]	GLIS3	106.729	-1.15471	0.0918518	-12.5714	3.03327e-36	2.49907e-34
ENSG00000145476,16	285440	cytochrome P450 family 4 subfamily V member 2 [Source:HGNC Symbol;Acc:HGNC:23198]	CYP4V2	142.425	1.13368	0.0901855	12.5706	3.06457e-36	2.51537e-34
ENSG00000091137,14	5172	solute carrier family 26 member 4 [Source:HGNC Symbol;Acc:HGNC:8818]	SLC26A4	29.7298	2.68384	0.213589	12.5654	3.27033e-36	2.6742e-34
ENSG00000105290,12	333	amyloid beta precursor like protein 1 [Source:HGNC Symbol;Acc:HGNC:597]	APLP1	643.255	-0.833303	0.0663655	-12.5563	3.67188e-36	2.99135e-34
ENSG00000181467,5	5912	RAP2B, member of RAS oncogene family [Source:HGNC Symbol;Acc:HGNC:9862]	RAP2B	182.672	-1.1039	0.0879821	-12.5469	4.13377e-36	3.35512e-34
ENSG00000116329,11	4985	opioid receptor delta 1 [Source:HGNC Symbol;Acc:HGNC:8153]	OPRD1	57.4556	2.13101	0.169998	12.5355	4.77135e-36	3.85826e-34
ENSG00000176438,12	161176	spectrin repeat containing nuclear envelope family member 3 [Source:HGNC Symbol;Acc:HGNC:19861]	SYNE3	176.392	-0.9694	0.0775563	-12.4993	7.53091e-36	6.06725e-34
ENSG00000242265,5	23089	paternally expressed 10 [Source:HGNC Symbol;Acc:HGNC:14005]	PEG10	1656.08	0.512865	0.0410371	12.4976	7.69324e-36	6.17524e-34
ENSG00000132386,11	5176	serpin family F member 1 [Source:HGNC Symbol;Acc:HGNC:8824]	SERPINF1	40.6778	1.88635	0.150974	12.4945	7.99491e-36	6.39388e-34
ENSG00000068971,14	5526	protein phosphatase 2 regulatory subunit B'beta [Source:HGNC Symbol;Acc:HGNC:9310]	PPP2R5B	143.974	-0.9897	0.079269	-12.4853	8.97615e-36	7.15242e-34
ENSG00000160191,18	5152	phosphodiesterase 9A [Source:HGNC Symbol;Acc:HGNC:8795]	PDE9A	134.884	-1.32244	0.106073	-12.4673	1.12594e-35	8.93916e-34
ENSG00000198938,2	4514	mitochondrially encoded cytochrome c oxidase III [Source:HGNC Symbol;Acc:HGNC:7422]	MT-CO3	35821.5	0.684527	0.054994	12.4473	1.44652e-35	1.14427e-33
ENSG00000166482,11	4239	microfibril associated protein 4 [Source:HGNC Symbol;Acc:HGNC:7035]	MFAP4	390.472	1.17688	0.0947366	12.4227	1.96846e-35	1.55153e-33
ENSG00000091490,11	23231	SEL1L family member 3 [Source:HGNC Symbol;Acc:HGNC:29108]	SEL1L3	545.78	-0.793313	0.0638708	-12.4206	2.02059e-35	1.58689e-33
ENSG00000182732,18	9628	regulator of G protein signaling 6 [Source:HGNC Symbol;Acc:HGNC:10002]	RGS6	319.693	-0.933021	0.0756068	-12.3404	5.48547e-35	4.29262e-33
ENSG00000113739,10	8614	stanniocalcin 2 [Source:HGNC Symbol;Acc:HGNC:11374]	STC2	234.471	-0.872345	0.0708036	-12.3206	7.01404e-35	5.4692e-33
ENSG00000121743,4	2700	gap junction protein alpha 3 [Source:HGNC Symbol;Acc:HGNC:4277]	GJA3	48.2574	-2.42131	0.196663	-12.312	7.80835e-35	6.0669e-33
ENSG00000133639,5	694	BTG anti-proliferation factor 1 [Source:HGNC Symbol;Acc:HGNC:1130]	BTG1	466.728	-0.706058	0.0574214	-12.2961	9.50693e-35	7.36046e-33
ENSG00000111331,13	4940	2'-5'-oligoadenylate synthetase 3 [Source:HGNC Symbol;Acc:HGNC:8088]	OAS3	920.269	-0.713941	0.0583431	-12.2369	1.97315e-34	1.52225e-32
ENSG00000113712,18	1452	casein kinase 1 alpha 1 [Source:HGNC Symbol;Acc:HGNC:2451]	CSNK1A1	897.505	-0.528139	0.0432968	-12.1981	3.18186e-34	2.44611e-32
ENSG00000065183,16	10885	WD repeat domain 3 [Source:HGNC Symbol;Acc:HGNC:12755]	WDR3	522.811	0.643	0.0527689	12.1852	3.72683e-34	2.85501e-32
ENSG00000100568,11	10490	vesicle transport through interaction with t-SNAREs 1B [Source:HGNC Symbol;Acc:HGNC:17793]	VTI1B	528.782	0.694611	0.0570764	12.1698	4.49938e-34	3.43479e-32
ENSG00000144354,14	83879	cell division cycle associated 7 [Source:HGNC Symbol;Acc:HGNC:14628]	CDCA7	580.146	0.620112	0.0509975	12.1597	5.09672e-34	3.87724e-32
ENSG00000231074,9	NA	HLA complex group 18 [Source:HGNC Symbol;Acc:HGNC:31337]	HCG18	328.133	0.788716	0.0649332	12.1466	5.98142e-34	4.53445e-32
ENSG00000103257,9	8140	solute carrier family 7 member 5 [Source:HGNC Symbol;Acc:HGNC:11063]	SLC7A5	701.606	-1.25492	0.10346	-12.1295	7.36942e-34	5.56736e-32
ENSG00000112893,9	4124	mannosidase alpha class 2A member 1 [Source:HGNC Symbol;Acc:HGNC:6824]	MAN2A1	226.217	-0.889087	0.0733427	-12.1224	8.04063e-34	6.05348e-32
ENSG00000149136,9	6749	structure specific recognition protein 1 [Source:HGNC Symbol;Acc:HGNC:11327]	SSRP1	1782.81	0.445834	0.036818	12.1091	9.44881e-34	7.08921e-32
ENSG00000152092,16	460	astrotactin 1 [Source:HGNC Symbol;Acc:HGNC:773]	ASTN1	239.485	-0.957233	0.0792597	-12.0772	1.39449e-33	1.04267e-31
ENSG00000071242,12	6196	ribosomal protein S6 kinase A2 [Source:HGNC Symbol;Acc:HGNC:10431]	RPS6KA2	879.715	-0.582457	0.0482304	-12.0765	1.40504e-33	1.04697e-31
ENSG00000135744,8	183	angiotensinogen [Source:HGNC Symbol;Acc:HGNC:333]	AGT	142.689	-1.34399	0.111335	-12.0716	1.49174e-33	1.10779e-31
ENSG00000095303,17	5742	prostaglandin-endoperoxide synthase 1 [Source:HGNC Symbol;Acc:HGNC:9604]	PTGS1	1012.91	-0.642794	0.0532804	-12.0644	1.6294e-33	1.20592e-31
ENSG00000177675,8	283316	CD163 molecule like 1 [Source:HGNC Symbol;Acc:HGNC:30375]	CD163L1	85.1175	1.13422	0.0940441	12.0605	1.70757e-33	1.25951e-31
ENSG00000103222,19	4363	ATP binding cassette subfamily C member 1 [Source:HGNC Symbol;Acc:HGNC:51]	ABCC1	201.594	-0.853088	0.0707448	-12.0587	1.74568e-33	1.28328e-31
ENSG00000067082,15	1316	Kruppel like factor 6 [Source:HGNC Symbol;Acc:HGNC:2235]	KLF6	614.722	-0.597728	0.0498263	-11.9962	3.71822e-33	2.72416e-31
ENSG00000234961,1	NA	novel transcript	AL133415,1	14265.6	-0.614919	0.0512652	-11.9949	3.78073e-33	2.76069e-31
ENSG00000137801,11	7057	thrombospondin 1 [Source:HGNC Symbol;Acc:HGNC:11785]	THBS1	139.735	-1.26058	0.105176	-11.9854	4.23746e-33	3.08388e-31
ENSG00000064651,14	6558	solute carrier family 12 member 2 [Source:HGNC Symbol;Acc:HGNC:10911]	SLC12A2	672.139	-0.810941	0.0678677	-11.9489	6.58252e-33	4.77462e-31
ENSG00000004866,20	7982	suppression of tumorigenicity 7 [Source:HGNC Symbol;Acc:HGNC:11351]	ST7	257.738	0.808903	0.0677506	11.9394	7.37311e-33	5.33037e-31
ENSG00000183258,12	51428	DEAD-box helicase 41 [Source:HGNC Symbol;Acc:HGNC:18674]	DDX41	521.272	-0.713188	0.0598016	-11.9259	8.67502e-33	6.24769e-31
ENSG00000198899,2	4508	mitochondrially encoded ATP synthase membrane subunit 6 [Source:HGNC Symbol;Acc:HGNC:7414]	MT-ATP6	17687.8	0.886184	0.074309	11.9257	8.69921e-33	6.24769e-31
ENSG00000145358,6	115265	DNA damage inducible transcript 4 like [Source:HGNC Symbol;Acc:HGNC:30555]	DDIT4L	15.4961	-3.82269	0.320615	-11.923	8.98013e-33	6.4283e-31
ENSG00000106070,19	2887	growth factor receptor bound protein 10 [Source:HGNC Symbol;Acc:HGNC:4564]	GRB10	2050.77	-0.458414	0.0385184	-11.9012	1.16686e-32	8.3255e-31
ENSG00000084444,14	57613	family with sequence similarity 234 member B [Source:HGNC Symbol;Acc:HGNC:29288]	FAM234B	149.3	-0.971362	0.0817754	-11.8784	1.53254e-32	1.0899e-30
ENSG00000135686,13	79786	kelch like family member 36 [Source:HGNC Symbol;Acc:HGNC:17844]	KLHL36	326.922	-0.640852	0.0539788	-11.8723	1.64886e-32	1.16882e-30
ENSG00000135862,6	3915	laminin subunit gamma 1 [Source:HGNC Symbol;Acc:HGNC:6492]	LAMC1	3456.14	-0.452259	0.0381309	-11.8607	1.89382e-32	1.33811e-30
ENSG00000126016,15	154796	angiomotin [Source:HGNC Symbol;Acc:HGNC:17810]	AMOT	136.209	1.0486	0.088786	11.8105	3.44669e-32	2.42747e-30
ENSG00000268089,3	55879	gamma-aminobutyric acid type A receptor theta subunit [Source:HGNC Symbol;Acc:HGNC:14454]	GABRQ	61.2128	-2.37257	0.201186	-11.7929	4.24674e-32	2.98132e-30
ENSG00000198886,2	4538	mitochondrially encoded NADH:ubiquinone oxidoreductase core subunit 4 [Source:HGNC Symbol;Acc:HGNC:7459]	MT-ND4	56937.6	0.698969	0.0592837	11.7902	4.3829e-32	3.06705e-30
ENSG00000165819,12	56339	methyltransferase like 3 [Source:HGNC Symbol;Acc:HGNC:17563]	METTL3	709.78	0.478763	0.0407002	11.7632	6.04247e-32	4.21487e-30
ENSG00000136158,12	10253	sprouty RTK signaling antagonist 2 [Source:HGNC Symbol;Acc:HGNC:11270]	SPRY2	1915.8	-0.378836	0.0322273	-11.7551	6.6478e-32	4.62234e-30
ENSG00000125630,15	84172	RNA polymerase I subunit B [Source:HGNC Symbol;Acc:HGNC:20454]	POLR1B	289.904	0.754134	0.0642008	11.7465	7.36022e-32	5.10145e-30
ENSG00000105993,15	10049	DnaJ heat shock protein family (Hsp40) member B6 [Source:HGNC Symbol;Acc:HGNC:14888]	DNAJB6	493.294	0.603807	0.0514766	11.7297	8.97511e-32	6.20106e-30
ENSG00000126562,17	65266	WNK lysine deficient protein kinase 4 [Source:HGNC Symbol;Acc:HGNC:14544]	WNK4	617.839	-1.18493	0.101036	-11.7277	9.18802e-32	6.32814e-30
ENSG00000131873,7	22856	chondroitin sulfate synthase 1 [Source:HGNC Symbol;Acc:HGNC:17198]	CHSY1	658.235	-0.718529	0.0614425	-11.6943	1.36251e-31	9.35459e-30
ENSG00000125870,11	6629	small nuclear ribonucleoprotein polypeptide B2 [Source:HGNC Symbol;Acc:HGNC:11155]	SNRPB2	479.05	0.814656	0.0698248	11.6671	1.87619e-31	1.2841e-29
ENSG00000198888,2	4535	mitochondrially encoded NADH:ubiquinone oxidoreductase core subunit 1 [Source:HGNC Symbol;Acc:HGNC:7455]	MT-ND1	7882.95	0.723502	0.062144	11.6424	2.50997e-31	1.71251e-29
ENSG00000148926,10	133	adrenomedullin [Source:HGNC Symbol;Acc:HGNC:259]	ADM	116.029	-1.38831	0.119432	-11.6243	3.10104e-31	2.10919e-29
ENSG00000065911,12	10797	methylenetetrahydrofolate dehydrogenase (NADP+ dependent) 2, methenyltetrahydrofolate cyclohydrolase [Source:HGNC Symbol;Acc:HGNC:7434]	MTHFD2	788.234	0.651278	0.0560856	11.6122	3.5721e-31	2.42204e-29
ENSG00000221932,6	641654	hepatocellular carcinoma, down-regulated 1 [Source:HGNC Symbol;Acc:HGNC:34400]	HEPN1	24.2086	-4.69154	0.404316	-11.6036	3.94884e-31	2.6692e-29
ENSG00000170961,7	3037	hyaluronan synthase 2 [Source:HGNC Symbol;Acc:HGNC:4819]	HAS2	265.874	0.852895	0.0735062	11.603	3.97698e-31	2.67992e-29
ENSG00000238258,1	NA	novel transcript, antisense to NRP1	AL121748,1	35.4866	-2.63471	0.227115	-11.6008	4.0837e-31	2.74337e-29
ENSG00000116194,13	9068	angiopoietin like 1 [Source:HGNC Symbol;Acc:HGNC:489]	ANGPTL1	28.6171	2.62232	0.226118	11.5971	4.26164e-31	2.85412e-29
ENSG00000135046,14	301	annexin A1 [Source:HGNC Symbol;Acc:HGNC:533]	ANXA1	1600.27	-0.729514	0.0629872	-11.5819	5.08887e-31	3.39771e-29
ENSG00000076003,5	4175	minichromosome maintenance complex component 6 [Source:HGNC Symbol;Acc:HGNC:6949]	MCM6	909.42	0.508709	0.0439507	11.5745	5.5469e-31	3.69224e-29
ENSG00000134824,14	9415	fatty acid desaturase 2 [Source:HGNC Symbol;Acc:HGNC:3575]	FADS2	1470.97	-0.548379	0.0474724	-11.5515	7.2513e-31	4.81209e-29
ENSG00000206579,9	114786	XK related 4 [Source:HGNC Symbol;Acc:HGNC:29394]	XKR4	37.6212	1.91337	0.165673	11.5491	7.46013e-31	4.93567e-29
ENSG00000157510,14	134265	actin filament associated protein 1 like 1 [Source:HGNC Symbol;Acc:HGNC:26714]	AFAP1L1	438.343	-0.689692	0.0597983	-11.5336	8.9292e-31	5.88976e-29
ENSG00000123329,19	64333	Rho GTPase activating protein 9 [Source:HGNC Symbol;Acc:HGNC:14130]	ARHGAP9	13.0626	4.98556	0.432988	11.5143	1.11739e-30	7.34821e-29
ENSG00000115380,20	2202	EGF containing fibulin extracellular matrix protein 1 [Source:HGNC Symbol;Acc:HGNC:3218]	EFEMP1	45.3248	-2.43331	0.211938	-11.4812	1.63899e-30	1.0746e-28
ENSG00000140939,14	8996	nucleolar protein 3 [Source:HGNC Symbol;Acc:HGNC:7869]	NOL3	221.047	-0.954743	0.0833517	-11.4544	2.23536e-30	1.46121e-28
ENSG00000133067,17	59352	leucine rich repeat containing G protein-coupled receptor 6 [Source:HGNC Symbol;Acc:HGNC:19719]	LGR6	17.81	3.30688	0.288755	11.4522	2.29269e-30	1.49422e-28
ENSG00000100968,14	4776	nuclear factor of activated T cells 4 [Source:HGNC Symbol;Acc:HGNC:7778]	NFATC4	70.4825	-1.36888	0.119614	-11.4441	2.51579e-30	1.63474e-28
ENSG00000166986,15	4141	methionyl-tRNA synthetase [Source:HGNC Symbol;Acc:HGNC:6898]	MARS	1288.22	0.612868	0.0535562	11.4435	2.53591e-30	1.64293e-28
ENSG00000006652,14	3475	interferon related developmental regulator 1 [Source:HGNC Symbol;Acc:HGNC:5456]	IFRD1	477.713	0.616402	0.0538876	11.4387	2.6796e-30	1.73088e-28
ENSG00000166801,15	63901	family with sequence similarity 111 member A [Source:HGNC Symbol;Acc:HGNC:24725]	FAM111A	556.144	0.694641	0.0607659	11.4314	2.9133e-30	1.87628e-28
ENSG00000107104,18	23189	KN motif and ankyrin repeat domains 1 [Source:HGNC Symbol;Acc:HGNC:19309]	KANK1	260.992	-0.691346	0.0605249	-11.4225	3.22828e-30	2.07303e-28
ENSG00000171724,3	57687	vesicle amine transport 1 like [Source:HGNC Symbol;Acc:HGNC:29315]	VAT1L	916.831	-0.723001	0.063349	-11.413	3.60202e-30	2.30624e-28
ENSG00000155893,13	92370	2-phosphoxylose phosphatase 1 [Source:HGNC Symbol;Acc:HGNC:26303]	PXYLP1	139.626	-0.957346	0.0838994	-11.4106	3.6996e-30	2.3618e-28
ENSG00000140575,13	8826	IQ motif containing GTPase activating protein 1 [Source:HGNC Symbol;Acc:HGNC:6110]	IQGAP1	3386.08	-0.640587	0.0561756	-11.4033	4.02629e-30	2.56286e-28
ENSG00000151693,11	8853	ArfGAP with SH3 domain, ankyrin repeat and PH domain 2 [Source:HGNC Symbol;Acc:HGNC:2721]	ASAP2	365.55	-0.696795	0.061121	-11.4002	4.16943e-30	2.64625e-28
ENSG00000163618,18	8618	calcium dependent secretion activator [Source:HGNC Symbol;Acc:HGNC:1426]	CADPS	101.717	-1.83091	0.160609	-11.3998	4.19014e-30	2.65169e-28
ENSG00000166348,18	159195	ubiquitin specific peptidase 54 [Source:HGNC Symbol;Acc:HGNC:23513]	USP54	859.373	0.526572	0.0463008	11.3729	5.70865e-30	3.60223e-28
ENSG00000107554,17	23268	dynamin binding protein [Source:HGNC Symbol;Acc:HGNC:30373]	DNMBP	480.467	-0.641769	0.0564946	-11.3598	6.6272e-30	4.16979e-28
ENSG00000114805,17	23007	phospholipase C eta 1 [Source:HGNC Symbol;Acc:HGNC:29185]	PLCH1	186.009	0.9364	0.0824796	11.3531	7.15692e-30	4.49015e-28
ENSG00000227057,10	9277	WD repeat domain 46 [Source:HGNC Symbol;Acc:HGNC:13923]	WDR46	308.117	0.707303	0.0623064	11.352	7.24714e-30	4.53372e-28
ENSG00000169398,19	5747	protein tyrosine kinase 2 [Source:HGNC Symbol;Acc:HGNC:9611]	PTK2	815.308	-0.528848	0.0466003	-11.3486	7.53582e-30	4.70084e-28
ENSG00000132970,14	10810	WASP family member 3 [Source:HGNC Symbol;Acc:HGNC:12734]	WASF3	555.474	-0.623347	0.0550091	-11.3317	9.14179e-30	5.6864e-28
ENSG00000072832,15	1400	collapsin response mediator protein 1 [Source:HGNC Symbol;Acc:HGNC:2365]	CRMP1	957.655	-0.495177	0.043837	-11.2959	1.37507e-29	8.52893e-28
ENSG00000171940,13	7764	zinc finger protein 217 [Source:HGNC Symbol;Acc:HGNC:13009]	ZNF217	1322.79	-0.541878	0.0480101	-11.2867	1.52585e-29	9.43736e-28
ENSG00000150991,15	7316	ubiquitin C [Source:HGNC Symbol;Acc:HGNC:12468]	UBC	4517.36	-0.621751	0.0550971	-11.2846	1.56288e-29	9.63908e-28
ENSG00000123240,17	10133	optineurin [Source:HGNC Symbol;Acc:HGNC:17142]	OPTN	122.616	-1.13596	0.100681	-11.2828	1.59626e-29	9.81722e-28
ENSG00000149256,16	26011	teneurin transmembrane protein 4 [Source:HGNC Symbol;Acc:HGNC:29945]	TENM4	322.845	-0.962639	0.0853462	-11.2792	1.6619e-29	1.01922e-27
ENSG00000111640,15	2597	glyceraldehyde-3-phosphate dehydrogenase [Source:HGNC Symbol;Acc:HGNC:4141]	GAPDH	62102	-0.516513	0.045825	-11.2714	1.8161e-29	1.11067e-27
ENSG00000168209,5	54541	DNA damage inducible transcript 4 [Source:HGNC Symbol;Acc:HGNC:24944]	DDIT4	1622.23	-0.894649	0.0793922	-11.2687	1.87248e-29	1.13877e-27
ENSG00000171992,13	11346	synaptopodin [Source:HGNC Symbol;Acc:HGNC:30672]	SYNPO	77.1398	-1.46064	0.129616	-11.2689	1.86794e-29	1.13877e-27
ENSG00000182718,16	302	annexin A2 [Source:HGNC Symbol;Acc:HGNC:537]	ANXA2	1795.27	-0.680517	0.060399	-11.267	1.90919e-29	1.15787e-27
ENSG00000115548,17	55818	lysine demethylase 3A [Source:HGNC Symbol;Acc:HGNC:20815]	KDM3A	1689.4	-0.627558	0.055709	-11.2649	1.95536e-29	1.18259e-27
ENSG00000167191,12	51704	G protein-coupled receptor class C group 5 member B [Source:HGNC Symbol;Acc:HGNC:13308]	GPRC5B	1606.92	-0.433806	0.0385293	-11.2591	2.08851e-29	1.25962e-27
ENSG00000129675,16	9459	Rac/Cdc42 guanine nucleotide exchange factor 6 [Source:HGNC Symbol;Acc:HGNC:685]	ARHGEF6	1110.12	0.648529	0.0576122	11.2568	2.14383e-29	1.28943e-27
ENSG00000129151,9	8424	gamma-butyrobetaine hydroxylase 1 [Source:HGNC Symbol;Acc:HGNC:964]	BBOX1	33.5904	2.04015	0.181391	11.2472	2.38977e-29	1.4334e-27
ENSG00000049860,14	3074	hexosaminidase subunit beta [Source:HGNC Symbol;Acc:HGNC:4879]	HEXB	876.904	-0.490355	0.0436136	-11.2432	2.50219e-29	1.49672e-27
ENSG00000110042,8	23220	deltex E3 ubiquitin ligase 4 [Source:HGNC Symbol;Acc:HGNC:29151]	DTX4	83.7774	1.21935	0.108778	11.2095	3.66233e-29	2.18469e-27
ENSG00000108691,9	6347	C-C motif chemokine ligand 2 [Source:HGNC Symbol;Acc:HGNC:10618]	CCL2	208.762	-1.35615	0.120995	-11.2084	3.71023e-29	2.20723e-27
ENSG00000112319,19	2070	EYA transcriptional coactivator and phosphatase 4 [Source:HGNC Symbol;Acc:HGNC:3522]	EYA4	583.541	0.747336	0.0667356	11.1985	4.14825e-29	2.46111e-27
ENSG00000166407,14	4004	LIM domain only 1 [Source:HGNC Symbol;Acc:HGNC:6641]	LMO1	66.7606	-1.69815	0.15168	-11.1956	4.28299e-29	2.53416e-27
ENSG00000124813,23	860	RUNX family transcription factor 2 [Source:HGNC Symbol;Acc:HGNC:10472]	RUNX2	67.4093	1.25972	0.112613	11.1863	4.75745e-29	2.80728e-27
ENSG00000131435,13	8572	PDZ and LIM domain 4 [Source:HGNC Symbol;Acc:HGNC:16501]	PDLIM4	229.939	-1.81257	0.162207	-11.1744	5.44287e-29	3.20308e-27
ENSG00000132434,9	55915	LanC like 2 [Source:HGNC Symbol;Acc:HGNC:6509]	LANCL2	275.887	0.852194	0.0763352	11.1638	6.12819e-29	3.59669e-27
ENSG00000108175,17	57178	zinc finger MIZ-type containing 1 [Source:HGNC Symbol;Acc:HGNC:16493]	ZMIZ1	852.022	-0.697323	0.0625055	-11.1562	6.67907e-29	3.90949e-27
ENSG00000198911,12	6721	sterol regulatory element binding transcription factor 2 [Source:HGNC Symbol;Acc:HGNC:11290]	SREBF2	2497.45	-0.611588	0.0549011	-11.1398	8.02922e-29	4.68722e-27
ENSG00000188706,13	51114	zinc finger DHHC-type containing 9 [Source:HGNC Symbol;Acc:HGNC:18475]	ZDHHC9	227.829	-0.704784	0.0633357	-11.1278	9.19263e-29	5.35207e-27
ENSG00000187678,9	81848	sprouty RTK signaling antagonist 4 [Source:HGNC Symbol;Acc:HGNC:15533]	SPRY4	1492.91	-0.508706	0.0457644	-11.1157	1.05164e-28	6.10652e-27
ENSG00000135446,17	1019	cyclin dependent kinase 4 [Source:HGNC Symbol;Acc:HGNC:1773]	CDK4	1207.78	0.473039	0.0426173	11.0997	1.25857e-28	7.28867e-27
ENSG00000106624,11	165	AE binding protein 1 [Source:HGNC Symbol;Acc:HGNC:303]	AEBP1	516.473	-0.804613	0.0727325	-11.0626	1.90397e-28	1.09972e-26
ENSG00000196562,14	55959	sulfatase 2 [Source:HGNC Symbol;Acc:HGNC:20392]	SULF2	51.5067	1.5306	0.138363	11.0622	1.91352e-28	1.10232e-26
ENSG00000128245,15	7533	tyrosine 3-monooxygenase/tryptophan 5-monooxygenase activation protein eta [Source:HGNC Symbol;Acc:HGNC:12853]	YWHAH	1328.3	-0.759057	0.0686965	-11.0494	2.20594e-28	1.26743e-26
ENSG00000115414,19	2335	fibronectin 1 [Source:HGNC Symbol;Acc:HGNC:3778]	FN1	1184.38	-0.732742	0.0663271	-11.0474	2.25658e-28	1.29312e-26
ENSG00000269968,1	NA	novel transcript, antisense to GAPDH	AC006064,4	20858.1	-0.556837	0.0505121	-11.0238	2.93309e-28	1.67639e-26
ENSG00000152377,14	6695	SPARC (osteonectin), cwcv and kazal like domains proteoglycan 1 [Source:HGNC Symbol;Acc:HGNC:11251]	SPOCK1	279.25	-1.06808	0.0970023	-11.0109	3.38782e-28	1.93124e-26
ENSG00000196361,10	1995	ELAV like RNA binding protein 3 [Source:HGNC Symbol;Acc:HGNC:3314]	ELAVL3	434.1	-0.824111	0.074858	-11.009	3.45858e-28	1.96644e-26
ENSG00000169032,9	5604	mitogen-activated protein kinase kinase 1 [Source:HGNC Symbol;Acc:HGNC:6840]	MAP2K1	813.411	-0.531987	0.0483282	-11.0078	3.50462e-28	1.98744e-26
ENSG00000236886,2	NA	novel transcript, antisense to IGFBP5 and TNP1	AC007563,2	90.0864	-1.31762	0.119884	-10.9908	4.23359e-28	2.39461e-26
ENSG00000179240,11	100506127	GVQW motif containing 3 [Source:HGNC Symbol;Acc:HGNC:51239]	GVQW3	198.019	0.814837	0.0741814	10.9844	4.54333e-28	2.56317e-26
ENSG00000151490,14	5800	protein tyrosine phosphatase receptor type O [Source:HGNC Symbol;Acc:HGNC:9678]	PTPRO	200.683	0.931168	0.0848202	10.9781	4.8685e-28	2.73953e-26
ENSG00000207827,1	407029	microRNA 30a [Source:HGNC Symbol;Acc:HGNC:31624]	MIR30A	21.7069	9.22092	0.840028	10.9769	4.93475e-28	2.76968e-26
ENSG00000134871,19	1284	collagen type IV alpha 2 chain [Source:HGNC Symbol;Acc:HGNC:2203]	COL4A2	2769.52	-0.976894	0.0890271	-10.973	5.15401e-28	2.88532e-26
ENSG00000169926,11	51621	Kruppel like factor 13 [Source:HGNC Symbol;Acc:HGNC:13672]	KLF13	816.322	-0.517032	0.0471619	-10.9629	5.76038e-28	3.21653e-26
ENSG00000273749,5	23191	cytoplasmic FMR1 interacting protein 1 [Source:HGNC Symbol;Acc:HGNC:13759]	CYFIP1	1240.62	-0.377113	0.0344267	-10.9541	6.35138e-28	3.53749e-26
ENSG00000127241,16	5648	mannan binding lectin serine peptidase 1 [Source:HGNC Symbol;Acc:HGNC:6901]	MASP1	33.7845	1.4195	0.12961	10.9521	6.49569e-28	3.60866e-26
ENSG00000138829,12	2201	fibrillin 2 [Source:HGNC Symbol;Acc:HGNC:3604]	FBN2	494.38	-0.688116	0.0628453	-10.9494	6.69159e-28	3.70806e-26
ENSG00000024422,12	30846	EH domain containing 2 [Source:HGNC Symbol;Acc:HGNC:3243]	EHD2	507.624	-0.980811	0.0897968	-10.9226	8.99205e-28	4.97021e-26
ENSG00000162723,10	89886	SLAM family member 9 [Source:HGNC Symbol;Acc:HGNC:18430]	SLAMF9	11.9673	-5.65044	0.517847	-10.9114	1.01676e-27	5.6058e-26
ENSG00000153291,16	9481	solute carrier family 25 member 27 [Source:HGNC Symbol;Acc:HGNC:21065]	SLC25A27	52.716	1.5598	0.143009	10.907	1.06699e-27	5.86791e-26
ENSG00000167011,9	375607	N-acetyltransferase 16 (putative) [Source:HGNC Symbol;Acc:HGNC:22030]	NAT16	53.7405	-1.64122	0.150524	-10.9034	1.11049e-27	6.09181e-26
ENSG00000185033,14	10509	semaphorin 4B [Source:HGNC Symbol;Acc:HGNC:10730]	SEMA4B	194.296	-1.18963	0.109118	-10.9022	1.125e-27	6.15594e-26
ENSG00000145390,11	54532	ubiquitin specific peptidase 53 [Source:HGNC Symbol;Acc:HGNC:29255]	USP53	170.811	-1.16822	0.107172	-10.9004	1.14719e-27	6.26165e-26
ENSG00000204362,6	400743	long intergenic non-protein coding RNA 2783 [Source:HGNC Symbol;Acc:HGNC:54303]	LINC02783	77.4184	-1.08103	0.0992888	-10.8877	1.31887e-27	7.18077e-26
ENSG00000135318,12	4907	5'-nucleotidase ecto [Source:HGNC Symbol;Acc:HGNC:8021]	NT5E	63.8248	-1.21893	0.112025	-10.8809	1.42226e-27	7.72444e-26
ENSG00000179104,9	160335	transmembrane O-mannosyltransferase targeting cadherins 2 [Source:HGNC Symbol;Acc:HGNC:25440]	TMTC2	313.145	0.657286	0.0604839	10.8671	1.65329e-27	8.9569e-26
ENSG00000187323,12	1630	DCC netrin 1 receptor [Source:HGNC Symbol;Acc:HGNC:2701]	DCC	185.569	-1.11621	0.102761	-10.8622	1.74427e-27	9.42639e-26
ENSG00000162458,13	54751	filamin binding LIM protein 1 [Source:HGNC Symbol;Acc:HGNC:24686]	FBLIM1	121.258	-1.02413	0.0942891	-10.8616	1.756e-27	9.46638e-26
ENSG00000234741,8	60674	growth arrest specific 5 [Source:HGNC Symbol;Acc:HGNC:16355]	GAS5	918.98	0.491257	0.0453631	10.8294	2.49689e-27	1.34272e-25
ENSG00000125629,15	51141	insulin induced gene 2 [Source:HGNC Symbol;Acc:HGNC:20452]	INSIG2	321.368	-1.1353	0.104996	-10.8127	2.99644e-27	1.6074e-25
ENSG00000285935,1	NA	novel transcript, antisense to WASF3	AL159978,1	306.546	-0.678906	0.0628013	-10.8104	3.07411e-27	1.64502e-25
ENSG00000133169,6	55859	brain expressed X-linked 1 [Source:HGNC Symbol;Acc:HGNC:1036]	BEX1	452.687	0.698799	0.0646469	10.8095	3.10451e-27	1.65723e-25
ENSG00000180801,14	79642	arylsulfatase family member J [Source:HGNC Symbol;Acc:HGNC:26286]	ARSJ	155.314	-0.966401	0.0894197	-10.8075	3.17307e-27	1.6897e-25
ENSG00000104783,14	3783	potassium calcium-activated channel subfamily N member 4 [Source:HGNC Symbol;Acc:HGNC:6293]	KCNN4	95.6666	1.42751	0.132138	10.8031	3.32704e-27	1.76738e-25
ENSG00000112972,15	3157	3-hydroxy-3-methylglutaryl-CoA synthase 1 [Source:HGNC Symbol;Acc:HGNC:5007]	HMGCS1	4961.22	-0.805025	0.0745407	-10.7998	3.44972e-27	1.8281e-25
ENSG00000156273,16	571	BTB domain and CNC homolog 1 [Source:HGNC Symbol;Acc:HGNC:935]	BACH1	712.314	-0.668578	0.0619156	-10.7982	3.50976e-27	1.85541e-25
ENSG00000134324,11	23175	lipin 1 [Source:HGNC Symbol;Acc:HGNC:13345]	LPIN1	182.917	-0.835896	0.0775316	-10.7814	4.21635e-27	2.22357e-25
ENSG00000140941,14	81631	microtubule associated protein 1 light chain 3 beta [Source:HGNC Symbol;Acc:HGNC:13352]	MAP1LC3B	556.012	-0.753541	0.0699292	-10.7758	4.48053e-27	2.35719e-25
ENSG00000231500,7	6222	ribosomal protein S18 [Source:HGNC Symbol;Acc:HGNC:10401]	RPS18	6521.59	0.655776	0.0608581	10.7755	4.49368e-27	2.35842e-25
ENSG00000186480,13	3638	insulin induced gene 1 [Source:HGNC Symbol;Acc:HGNC:6083]	INSIG1	1028.98	-0.671702	0.0624303	-10.7592	5.36131e-27	2.80704e-25
ENSG00000153956,16	781	calcium voltage-gated channel auxiliary subunit alpha2delta 1 [Source:HGNC Symbol;Acc:HGNC:1399]	CACNA2D1	17.8189	2.85836	0.265799	10.7538	5.685e-27	2.96939e-25
ENSG00000116830,12	8458	transcription termination factor 2 [Source:HGNC Symbol;Acc:HGNC:12398]	TTF2	465.608	0.56008	0.0521118	10.7477	6.07874e-27	3.16747e-25
ENSG00000122085,17	130916	mitochondrial transcription termination factor 4 [Source:HGNC Symbol;Acc:HGNC:28785]	MTERF4	271.095	0.64315	0.0599872	10.7214	8.07313e-27	4.19668e-25
ENSG00000119547,6	9480	one cut homeobox 2 [Source:HGNC Symbol;Acc:HGNC:8139]	ONECUT2	213.527	-0.911329	0.0850194	-10.7191	8.28272e-27	4.29541e-25
ENSG00000071994,11	5134	programmed cell death 2 [Source:HGNC Symbol;Acc:HGNC:8762]	PDCD2	338.507	0.706753	0.0660939	10.6932	1.09564e-26	5.66849e-25
ENSG00000150687,12	11098	serine protease 23 [Source:HGNC Symbol;Acc:HGNC:14370]	PRSS23	44.1276	-1.74254	0.163033	-10.6883	1.15529e-26	5.96301e-25
ENSG00000103184,12	9717	SEC14 like lipid binding 5 [Source:HGNC Symbol;Acc:HGNC:29032]	SEC14L5	24.7995	-2.07655	0.194412	-10.6812	1.2466e-26	6.4191e-25
ENSG00000114541,15	23150	FERM domain containing 4B [Source:HGNC Symbol;Acc:HGNC:24886]	FRMD4B	1267.93	-0.526312	0.0492958	-10.6766	1.30947e-26	6.727e-25
ENSG00000166432,15	84460	zinc finger matrin-type 1 [Source:HGNC Symbol;Acc:HGNC:29377]	ZMAT1	326.484	0.868059	0.081402	10.6639	1.50246e-26	7.70028e-25
ENSG00000141562,18	26502	nuclear prelamin A recognition factor [Source:HGNC Symbol;Acc:HGNC:29916]	NARF	378.707	-0.610804	0.057335	-10.6533	1.68376e-26	8.60925e-25
ENSG00000126749,16	10436	EMG1 N1-specific pseudouridine methyltransferase [Source:HGNC Symbol;Acc:HGNC:16912]	EMG1	445.634	0.545467	0.0512515	10.6429	1.8808e-26	9.5943e-25
ENSG00000056972,20	10758	TRAF3 interacting protein 2 [Source:HGNC Symbol;Acc:HGNC:1343]	TRAF3IP2	302.722	0.644093	0.0605542	10.6366	2.01264e-26	1.02429e-24
ENSG00000006459,11	80853	lysine demethylase 7A [Source:HGNC Symbol;Acc:HGNC:22224]	KDM7A	88.7752	-1.52268	0.143246	-10.6298	2.16511e-26	1.09932e-24
ENSG00000136859,10	23452	angiopoietin like 2 [Source:HGNC Symbol;Acc:HGNC:490]	ANGPTL2	155.066	-0.979505	0.0922488	-10.6181	2.45553e-26	1.24389e-24
ENSG00000116717,13	1647	growth arrest and DNA damage inducible alpha [Source:HGNC Symbol;Acc:HGNC:4095]	GADD45A	357.979	-0.603837	0.0569208	-10.6084	2.72452e-26	1.37696e-24
ENSG00000152291,14	10618	trans-golgi network protein 2 [Source:HGNC Symbol;Acc:HGNC:15450]	TGOLN2	2287.27	-0.3697	0.0348816	-10.5987	3.02128e-26	1.52341e-24
ENSG00000130477,15	23025	unc-13 homolog A [Source:HGNC Symbol;Acc:HGNC:23150]	UNC13A	1395.94	-0.593413	0.0562393	-10.5516	4.99612e-26	2.51337e-24
ENSG00000272114,1	NA	novel transcript, antisense to VEGFA	AL136131,3	303.028	-0.873636	0.082838	-10.5463	5.2828e-26	2.65148e-24
ENSG00000165732,13	9188	DExD-box helicase 21 [Source:HGNC Symbol;Acc:HGNC:2744]	DDX21	939.483	0.619555	0.0588112	10.5346	5.98061e-26	2.99483e-24
ENSG00000135924,15	3300	DnaJ heat shock protein family (Hsp40) member B2 [Source:HGNC Symbol;Acc:HGNC:5228]	DNAJB2	431.694	-0.706782	0.0671214	-10.5299	6.29045e-26	3.14278e-24
ENSG00000160131,13	203547	vacuolar ATPase assembly factor VMA21 [Source:HGNC Symbol;Acc:HGNC:22082]	VMA21	891.681	0.636125	0.060497	10.515	7.37024e-26	3.67384e-24
ENSG00000197746,14	5660	prosaposin [Source:HGNC Symbol;Acc:HGNC:9498]	PSAP	4853.82	-0.423038	0.0403141	-10.4935	9.24993e-26	4.60031e-24
ENSG00000164294,14	493869	glutathione peroxidase 8 (putative) [Source:HGNC Symbol;Acc:HGNC:33100]	GPX8	155.264	0.933835	0.08901	10.4913	9.46728e-26	4.69771e-24
ENSG00000175445,17	4023	lipoprotein lipase [Source:HGNC Symbol;Acc:HGNC:6677]	LPL	494.027	-0.550377	0.0525121	-10.481	1.05657e-25	5.23084e-24
ENSG00000167996,16	2495	ferritin heavy chain 1 [Source:HGNC Symbol;Acc:HGNC:3976]	FTH1	2302.66	-0.464759	0.0443757	-10.4733	1.1463e-25	5.66224e-24
ENSG00000196083,10	3556	interleukin 1 receptor accessory protein [Source:HGNC Symbol;Acc:HGNC:5995]	IL1RAP	1861.12	-0.630838	0.0602348	-10.473	1.14947e-25	5.66511e-24
ENSG00000225783,8	440823	myocardial infarction associated transcript [Source:HGNC Symbol;Acc:HGNC:33425]	MIAT	213.006	-1.05195	0.100588	-10.458	1.34645e-25	6.62095e-24
ENSG00000163637,13	166336	prickle planar cell polarity protein 2 [Source:HGNC Symbol;Acc:HGNC:20340]	PRICKLE2	720.123	-0.544841	0.0521197	-10.4536	1.40996e-25	6.91769e-24
ENSG00000115318,12	84695	lysyl oxidase like 3 [Source:HGNC Symbol;Acc:HGNC:13869]	LOXL3	224.586	-0.680519	0.0651114	-10.4516	1.44062e-25	7.05227e-24
ENSG00000141458,13	4864	NPC intracellular cholesterol transporter 1 [Source:HGNC Symbol;Acc:HGNC:7897]	NPC1	515.732	-0.597349	0.0572635	-10.4316	1.77871e-25	8.68781e-24
ENSG00000109099,15	5376	peripheral myelin protein 22 [Source:HGNC Symbol;Acc:HGNC:9118]	PMP22	1072.98	-0.577765	0.055422	-10.4248	1.9101e-25	9.30876e-24
ENSG00000084112,15	54434	slingshot protein phosphatase 1 [Source:HGNC Symbol;Acc:HGNC:30579]	SSH1	855.161	-0.479926	0.0460457	-10.4228	1.95069e-25	9.4854e-24
ENSG00000167508,12	4597	mevalonate diphosphate decarboxylase [Source:HGNC Symbol;Acc:HGNC:7529]	MVD	294.691	-1.40337	0.134726	-10.4164	2.08631e-25	1.01223e-23
ENSG00000173113,6	51504	tRNA methyltransferase subunit 11-2 [Source:HGNC Symbol;Acc:HGNC:26940]	TRMT112	371.686	0.737166	0.0708016	10.4117	2.19257e-25	1.06143e-23
ENSG00000101236,17	11237	ring finger protein 24 [Source:HGNC Symbol;Acc:HGNC:13779]	RNF24	295.687	-0.665224	0.0639201	-10.4071	2.30059e-25	1.11126e-23
ENSG00000185985,10	84631	SLIT and NTRK like family member 2 [Source:HGNC Symbol;Acc:HGNC:13449]	SLITRK2	117.41	0.859394	0.0825883	10.4058	2.33373e-25	1.12478e-23
ENSG00000130513,6	9518	growth differentiation factor 15 [Source:HGNC Symbol;Acc:HGNC:30142]	GDF15	54.3209	-2.03221	0.195793	-10.3794	3.07815e-25	1.48029e-23
ENSG00000114200,10	590	butyrylcholinesterase [Source:HGNC Symbol;Acc:HGNC:983]	BCHE	904.848	0.826378	0.0796808	10.3711	3.35657e-25	1.61064e-23
ENSG00000137501,17	54843	synaptotagmin like 2 [Source:HGNC Symbol;Acc:HGNC:15585]	SYTL2	217.148	-0.837895	0.0808363	-10.3653	3.56503e-25	1.70691e-23
ENSG00000117114,19	23266	adhesion G protein-coupled receptor L2 [Source:HGNC Symbol;Acc:HGNC:18582]	ADGRL2	207.608	0.683355	0.0659396	10.3634	3.63949e-25	1.73875e-23
ENSG00000012232,9	2137	exostosin like glycosyltransferase 3 [Source:HGNC Symbol;Acc:HGNC:3518]	EXTL3	2844.09	-0.502606	0.0485882	-10.3442	4.4469e-25	2.11985e-23
ENSG00000025039,15	58528	Ras related GTP binding D [Source:HGNC Symbol;Acc:HGNC:19903]	RRAGD	257.051	-0.665912	0.0643823	-10.3431	4.49785e-25	2.13947e-23
ENSG00000246859,3	NA	STARD4 antisense RNA 1 [Source:HGNC Symbol;Acc:HGNC:44117]	STARD4-AS1	384.761	0.601892	0.0582624	10.3307	5.11732e-25	2.42884e-23
ENSG00000093144,19	55862	ethylmalonyl-CoA decarboxylase 1 [Source:HGNC Symbol;Acc:HGNC:21489]	ECHDC1	386.34	0.831267	0.0804716	10.3299	5.15941e-25	2.4435e-23
ENSG00000125375,15	27109	distal membrane arm assembly complex 2 like [Source:HGNC Symbol;Acc:HGNC:18799]	DMAC2L	211.415	0.755376	0.0732778	10.3084	6.45816e-25	3.05197e-23
ENSG00000261824,7	148189	long intergenic non-protein coding RNA 662 [Source:HGNC Symbol;Acc:HGNC:27122]	LINC00662	180.766	0.833732	0.0809123	10.3041	6.74892e-25	3.18249e-23
ENSG00000182180,14	51021	mitochondrial ribosomal protein S16 [Source:HGNC Symbol;Acc:HGNC:14048]	MRPS16	513.645	0.505231	0.0490643	10.2973	7.24389e-25	3.40853e-23
ENSG00000111142,14	10988	methionyl aminopeptidase 2 [Source:HGNC Symbol;Acc:HGNC:16672]	METAP2	883.863	0.653382	0.0634633	10.2954	7.38925e-25	3.46945e-23
ENSG00000136802,11	56262	leucine rich repeat containing 8 VRAC subunit A [Source:HGNC Symbol;Acc:HGNC:19027]	LRRC8A	527.987	-0.9105	0.088603	-10.2762	9.02361e-25	4.22774e-23
ENSG00000167110,17	2801	golgin A2 [Source:HGNC Symbol;Acc:HGNC:4425]	GOLGA2	317.492	-0.59936	0.0583287	-10.2756	9.08073e-25	4.24539e-23
ENSG00000144021,3	9391	cytosolic iron-sulfur assembly component 1 [Source:HGNC Symbol;Acc:HGNC:14280]	CIAO1	644.441	0.436986	0.0425348	10.2736	9.26877e-25	4.32404e-23
ENSG00000197043,14	309	annexin A6 [Source:HGNC Symbol;Acc:HGNC:544]	ANXA6	539.437	-0.556917	0.0542101	-10.2733	9.29627e-25	4.32762e-23
ENSG00000160285,15	4047	lanosterol synthase [Source:HGNC Symbol;Acc:HGNC:6708]	LSS	1054.95	-0.654025	0.0637749	-10.2552	1.1212e-24	5.20835e-23
ENSG00000275342,5	157285	PEAK1 related, kinase-activating pseudokinase 1 [Source:HGNC Symbol;Acc:HGNC:25438]	PRAG1	170.735	-1.136	0.110785	-10.2541	1.13399e-24	5.25654e-23
ENSG00000138119,17	26509	myoferlin [Source:HGNC Symbol;Acc:HGNC:3656]	MYOF	534.865	-0.595216	0.0580899	-10.2465	1.22757e-24	5.67828e-23
ENSG00000031698,13	6301	seryl-tRNA synthetase [Source:HGNC Symbol;Acc:HGNC:10537]	SARS	1628.74	0.582506	0.0568642	10.2438	1.26174e-24	5.82403e-23
ENSG00000165349,12	84889	solute carrier family 7 member 3 [Source:HGNC Symbol;Acc:HGNC:11061]	SLC7A3	11.3569	2.66715	0.260676	10.2316	1.43076e-24	6.59025e-23
ENSG00000078804,13	58476	tumor protein p53 inducible nuclear protein 2 [Source:HGNC Symbol;Acc:HGNC:16104]	TP53INP2	167.599	-0.943532	0.092259	-10.227	1.50122e-24	6.90026e-23
ENSG00000125844,16	6238	ribosome binding protein 1 [Source:HGNC Symbol;Acc:HGNC:10448]	RRBP1	774.778	-0.653069	0.0640489	-10.1964	2.05734e-24	9.43652e-23
ENSG00000104415,14	8840	cellular communication network factor 4 [Source:HGNC Symbol;Acc:HGNC:12769]	CCN4	2095.44	-0.48528	0.0476726	-10.1794	2.44996e-24	1.12138e-22
ENSG00000196182,10	83931	serine/threonine kinase 40 [Source:HGNC Symbol;Acc:HGNC:21373]	STK40	348.029	-0.767329	0.0754659	-10.1679	2.75805e-24	1.25976e-22
ENSG00000113369,9	57561	arrestin domain containing 3 [Source:HGNC Symbol;Acc:HGNC:29263]	ARRDC3	1521.44	-0.63789	0.0629148	-10.139	3.71044e-24	1.69123e-22
ENSG00000100577,19	2954	glutathione S-transferase zeta 1 [Source:HGNC Symbol;Acc:HGNC:4643]	GSTZ1	186.716	0.795871	0.0786345	10.1211	4.45176e-24	2.02069e-22
ENSG00000138363,15	471	5-aminoimidazole-4-carboxamide ribonucleotide formyltransferase/IMP cyclohydrolase [Source:HGNC Symbol;Acc:HGNC:794]	ATIC	608.684	0.501403	0.0495396	10.1213	4.44693e-24	2.02069e-22
ENSG00000205213,14	55366	leucine rich repeat containing G protein-coupled receptor 4 [Source:HGNC Symbol;Acc:HGNC:13299]	LGR4	712.066	0.565082	0.0558447	10.1188	4.55937e-24	2.06524e-22
ENSG00000172379,21	9915	aryl hydrocarbon receptor nuclear translocator 2 [Source:HGNC Symbol;Acc:HGNC:16876]	ARNT2	819.696	-0.465644	0.0460716	-10.107	5.14476e-24	2.32558e-22
ENSG00000182934,12	6734	SRP receptor subunit alpha [Source:HGNC Symbol;Acc:HGNC:11307]	SRPRA	863.53	0.525179	0.0519912	10.1013	5.45202e-24	2.45938e-22
ENSG00000158195,11	10163	WASP family member 2 [Source:HGNC Symbol;Acc:HGNC:12733]	WASF2	1460.22	-0.392051	0.0388178	-10.0998	5.53716e-24	2.49264e-22
ENSG00000184226,15	5101	protocadherin 9 [Source:HGNC Symbol;Acc:HGNC:8661]	PCDH9	522.478	0.847552	0.0839347	10.0978	5.65186e-24	2.53903e-22
ENSG00000171552,13	598	BCL2 like 1 [Source:HGNC Symbol;Acc:HGNC:992]	BCL2L1	703.152	-0.532901	0.0527936	-10.094	5.87001e-24	2.63162e-22
ENSG00000161011,20	8878	sequestosome 1 [Source:HGNC Symbol;Acc:HGNC:11280]	SQSTM1	1149.96	-0.645986	0.0640026	-10.0931	5.92556e-24	2.65108e-22
ENSG00000135631,16	26056	RAB11 family interacting protein 5 [Source:HGNC Symbol;Acc:HGNC:24845]	RAB11FIP5	48.6638	-1.49623	0.148271	-10.0912	6.04442e-24	2.69873e-22
ENSG00000099331,13	4650	myosin IXB [Source:HGNC Symbol;Acc:HGNC:7609]	MYO9B	2187.26	-0.716468	0.0710612	-10.0824	6.6079e-24	2.94429e-22
ENSG00000113161,16	3156	3-hydroxy-3-methylglutaryl-CoA reductase [Source:HGNC Symbol;Acc:HGNC:5006]	HMGCR	2168.93	-0.726274	0.072055	-10.0794	6.81207e-24	3.02908e-22
ENSG00000123610,5	7130	TNF alpha induced protein 6 [Source:HGNC Symbol;Acc:HGNC:11898]	TNFAIP6	91.4747	1.253	0.124402	10.0722	7.33478e-24	3.25488e-22
ENSG00000076043,10	25996	RNA exonuclease 2 [Source:HGNC Symbol;Acc:HGNC:17851]	REXO2	153.076	0.778769	0.0774337	10.0572	8.53585e-24	3.78019e-22
ENSG00000131473,17	47	ATP citrate lyase [Source:HGNC Symbol;Acc:HGNC:115]	ACLY	1599.38	-0.397379	0.0395151	-10.0564	8.6091e-24	3.80491e-22
ENSG00000197093,11	79690	galactose-3-O-sulfotransferase 4 [Source:HGNC Symbol;Acc:HGNC:24145]	GAL3ST4	159.017	0.863967	0.0859928	10.047	9.47352e-24	4.17849e-22
ENSG00000170315,14	7314	ubiquitin B [Source:HGNC Symbol;Acc:HGNC:12463]	UBB	1812.68	0.493186	0.049224	10.0192	1.25486e-23	5.52365e-22
ENSG00000127526,15	79939	solute carrier family 35 member E1 [Source:HGNC Symbol;Acc:HGNC:20803]	SLC35E1	684.057	-0.476341	0.0476068	-10.0057	1.4383e-23	6.31837e-22
ENSG00000147041,12	94122	synaptotagmin like 5 [Source:HGNC Symbol;Acc:HGNC:15589]	SYTL5	90.8675	-1.51608	0.151982	-9.97544	1.95236e-23	8.55943e-22
ENSG00000170891,11	54360	cytokine like 1 [Source:HGNC Symbol;Acc:HGNC:24435]	CYTL1	77.5066	1.17772	0.118121	9.97047	2.05257e-23	8.98072e-22
ENSG00000101493,11	9658	zinc finger protein 516 [Source:HGNC Symbol;Acc:HGNC:28990]	ZNF516	153.648	-0.754831	0.0757295	-9.96746	2.11571e-23	9.23844e-22
ENSG00000129003,18	54832	vacuolar protein sorting 13 homolog C [Source:HGNC Symbol;Acc:HGNC:23594]	VPS13C	943.107	-0.624674	0.0626918	-9.96421	2.18595e-23	9.5261e-22
ENSG00000029364,12	55334	solute carrier family 39 member 9 [Source:HGNC Symbol;Acc:HGNC:20182]	SLC39A9	1270.84	0.424587	0.042648	9.95561	2.38349e-23	1.03663e-21
ENSG00000007171,18	4843	nitric oxide synthase 2 [Source:HGNC Symbol;Acc:HGNC:7873]	NOS2	488.465	-0.689547	0.0692684	-9.95471	2.40515e-23	1.04397e-21
ENSG00000186868,15	4137	microtubule associated protein tau [Source:HGNC Symbol;Acc:HGNC:6893]	MAPT	439.85	-0.628068	0.0631175	-9.95076	2.50264e-23	1.08413e-21
ENSG00000120742,11	27230	stress associated endoplasmic reticulum protein 1 [Source:HGNC Symbol;Acc:HGNC:10759]	SERP1	760.921	0.56927	0.05724	9.94532	2.64323e-23	1.14277e-21
ENSG00000132780,17	4678	nuclear autoantigenic sperm protein [Source:HGNC Symbol;Acc:HGNC:7644]	NASP	2259.77	0.443717	0.0446867	9.92951	3.0978e-23	1.33665e-21
ENSG00000197102,12	1778	dynein cytoplasmic 1 heavy chain 1 [Source:HGNC Symbol;Acc:HGNC:2961]	DYNC1H1	5850.65	-0.349794	0.035232	-9.9283	3.13556e-23	1.35027e-21
ENSG00000164733,21	1508	cathepsin B [Source:HGNC Symbol;Acc:HGNC:2527]	CTSB	833.283	-0.509853	0.0514575	-9.90824	3.83347e-23	1.64756e-21
ENSG00000161013,17	11282	alpha-1,3-mannosyl-glycoprotein 4-beta-N-acetylglucosaminyltransferase B [Source:HGNC Symbol;Acc:HGNC:7048]	MGAT4B	301.054	-0.716355	0.0723078	-9.90702	3.88036e-23	1.66444e-21
ENSG00000173273,16	8658	tankyrase [Source:HGNC Symbol;Acc:HGNC:11941]	TNKS	1826.92	-0.38815	0.0392359	-9.89273	4.47672e-23	1.91647e-21
ENSG00000072864,15	54820	nudE neurodevelopment protein 1 [Source:HGNC Symbol;Acc:HGNC:17619]	NDE1	1022.5	-0.397701	0.0402204	-9.88803	4.69153e-23	2.0045e-21
ENSG00000225792,2	NA	novel transcript	AC004540,2	401.137	0.836262	0.0846788	9.87569	5.30655e-23	2.26285e-21
ENSG00000112033,14	5467	peroxisome proliferator activated receptor delta [Source:HGNC Symbol;Acc:HGNC:9235]	PPARD	328.371	-0.729559	0.0738908	-9.87346	5.42583e-23	2.3092e-21
ENSG00000169129,15	84632	actin filament associated protein 1 like 2 [Source:HGNC Symbol;Acc:HGNC:25901]	AFAP1L2	58.5404	1.48319	0.150307	9.86772	5.74529e-23	2.44041e-21
ENSG00000143384,13	4170	MCL1 apoptosis regulator, BCL2 family member [Source:HGNC Symbol;Acc:HGNC:6943]	MCL1	1644.12	-0.495813	0.0502557	-9.86581	5.85592e-23	2.48257e-21
ENSG00000084623,11	8668	eukaryotic translation initiation factor 3 subunit I [Source:HGNC Symbol;Acc:HGNC:3272]	EIF3I	1094.45	0.433078	0.0439354	9.85715	6.38328e-23	2.70089e-21
ENSG00000179241,13	143458	low density lipoprotein receptor class A domain containing 3 [Source:HGNC Symbol;Acc:HGNC:27046]	LDLRAD3	429.41	0.555227	0.0564091	9.84286	7.35884e-23	3.10765e-21
ENSG00000146242,8	7162	trophoblast glycoprotein [Source:HGNC Symbol;Acc:HGNC:12004]	TPBG	14.6604	5.98981	0.608695	9.84042	7.53983e-23	3.17794e-21
ENSG00000100226,16	9567	GTP binding protein 1 [Source:HGNC Symbol;Acc:HGNC:4669]	GTPBP1	898.268	-0.67512	0.0686141	-9.83937	7.61837e-23	3.20485e-21
ENSG00000150403,18	55002	transmembrane and coiled-coil domains 3 [Source:HGNC Symbol;Acc:HGNC:20329]	TMCO3	477.657	-0.494362	0.0502949	-9.82927	8.42233e-23	3.53624e-21
ENSG00000135452,10	6302	tetraspanin 31 [Source:HGNC Symbol;Acc:HGNC:10539]	TSPAN31	625.978	0.496423	0.050675	9.79621	1.16886e-22	4.8982e-21
ENSG00000120693,13	4093	SMAD family member 9 [Source:HGNC Symbol;Acc:HGNC:6774]	SMAD9	134.844	-1.03771	0.106006	-9.78914	1.25356e-22	5.23308e-21
ENSG00000164649,20	55536	cell division cycle associated 7 like [Source:HGNC Symbol;Acc:HGNC:30777]	CDCA7L	1434.71	0.429393	0.0438642	9.78915	1.25344e-22	5.23308e-21
ENSG00000170027,7	7532	tyrosine 3-monooxygenase/tryptophan 5-monooxygenase activation protein gamma [Source:HGNC Symbol;Acc:HGNC:12852]	YWHAG	2521.49	-0.356628	0.0364332	-9.78855	1.26094e-22	5.25385e-21
ENSG00000100221,10	9929	Josephin domain containing 1 [Source:HGNC Symbol;Acc:HGNC:28953]	JOSD1	1091.44	-0.418417	0.0427644	-9.78424	1.31575e-22	5.47178e-21
ENSG00000118971,8	894	cyclin D2 [Source:HGNC Symbol;Acc:HGNC:1583]	CCND2	2470.33	-0.457501	0.0468566	-9.76385	1.60935e-22	6.68001e-21
ENSG00000054598,9	2296	forkhead box C1 [Source:HGNC Symbol;Acc:HGNC:3800]	FOXC1	62.3318	1.28642	0.131818	9.75909	1.68656e-22	6.98721e-21
ENSG00000184787,19	7327	ubiquitin conjugating enzyme E2 G2 [Source:HGNC Symbol;Acc:HGNC:12483]	UBE2G2	980.818	0.3867	0.0396292	9.75795	1.70575e-22	7.05335e-21
ENSG00000260466,1	NA	novel transcript, antisense to SLC7A5	AC126696,2	45.4987	-1.29932	0.133317	-9.74606	1.9176e-22	7.91434e-21
ENSG00000111581,10	57122	nucleoporin 107 [Source:HGNC Symbol;Acc:HGNC:29914]	NUP107	813.145	0.485617	0.0498313	9.74521	1.93376e-22	7.96598e-21
ENSG00000173276,14	49854	zinc finger and BTB domain containing 21 [Source:HGNC Symbol;Acc:HGNC:13083]	ZBTB21	592.695	-0.619456	0.0635753	-9.74366	1.96351e-22	8.07332e-21
ENSG00000163516,14	55139	ankyrin repeat and zinc finger peptidyl tRNA hydrolase 1 [Source:HGNC Symbol;Acc:HGNC:25527]	ANKZF1	271.38	-0.574805	0.0590213	-9.73894	2.05689e-22	8.44136e-21
ENSG00000162373,13	79656	BEN domain containing 5 [Source:HGNC Symbol;Acc:HGNC:25668]	BEND5	314.15	-0.752845	0.0773855	-9.7285	2.27938e-22	9.33689e-21
ENSG00000171476,22	84525	HOP homeobox [Source:HGNC Symbol;Acc:HGNC:24961]	HOPX	396.174	-0.725256	0.0745902	-9.72321	2.40093e-22	9.81638e-21
ENSG00000165495,16	63876	PBX/knotted 1 homeobox 2 [Source:HGNC Symbol;Acc:HGNC:16714]	PKNOX2	39.4468	1.50921	0.155314	9.71719	2.54719e-22	1.03949e-20
ENSG00000108861,9	1845	dual specificity phosphatase 3 [Source:HGNC Symbol;Acc:HGNC:3069]	DUSP3	441.136	-0.54028	0.0556498	-9.70857	2.77196e-22	1.12911e-20
ENSG00000124562,10	6631	small nuclear ribonucleoprotein polypeptide C [Source:HGNC Symbol;Acc:HGNC:11157]	SNRPC	454.375	0.578355	0.0595837	9.7066	2.82617e-22	1.14905e-20
ENSG00000011028,14	9902	mannose receptor C type 2 [Source:HGNC Symbol;Acc:HGNC:16875]	MRC2	1810.91	-1.07534	0.110889	-9.69742	3.0922e-22	1.25487e-20
ENSG00000124098,10	116151	family with sequence similarity 210 member B [Source:HGNC Symbol;Acc:HGNC:16102]	FAM210B	776.529	0.631138	0.0650914	9.69618	3.12995e-22	1.26783e-20
ENSG00000137962,13	9411	Rho GTPase activating protein 29 [Source:HGNC Symbol;Acc:HGNC:30207]	ARHGAP29	22.7781	-2.74113	0.28273	-9.69522	3.15956e-22	1.27746e-20
ENSG00000157985,19	116987	ArfGAP with GTPase domain, ankyrin repeat and PH domain 1 [Source:HGNC Symbol;Acc:HGNC:16922]	AGAP1	1004.06	-0.439499	0.0453806	-9.68472	3.50179e-22	1.41321e-20
ENSG00000273090,1	NA	novel transcript	AC007378,1	89.3496	-1.16445	0.120266	-9.6823	3.58549e-22	1.44432e-20
ENSG00000166963,13	4130	microtubule associated protein 1A [Source:HGNC Symbol;Acc:HGNC:6835]	MAP1A	747.614	-0.61388	0.0634999	-9.66742	4.14711e-22	1.66747e-20
ENSG00000134109,11	9695	ER degradation enhancing alpha-mannosidase like protein 1 [Source:HGNC Symbol;Acc:HGNC:18967]	EDEM1	514.272	-0.5555	0.0575484	-9.65274	4.78615e-22	1.92088e-20
ENSG00000144283,21	8502	plakophilin 4 [Source:HGNC Symbol;Acc:HGNC:9026]	PKP4	665.932	0.446023	0.0463061	9.63205	5.85501e-22	2.34555e-20
ENSG00000080709,15	3781	potassium calcium-activated channel subfamily N member 2 [Source:HGNC Symbol;Acc:HGNC:6291]	KCNN2	36.853	1.54444	0.160608	9.61621	6.83006e-22	2.73115e-20
ENSG00000104490,18	83988	neurocalcin delta [Source:HGNC Symbol;Acc:HGNC:7655]	NCALD	749.752	-0.471856	0.0491171	-9.60677	7.48594e-22	2.98794e-20
ENSG00000064692,19	9627	synuclein alpha interacting protein [Source:HGNC Symbol;Acc:HGNC:11139]	SNCAIP	219.961	0.735914	0.0766079	9.60625	7.52421e-22	2.99774e-20
ENSG00000008513,16	6482	ST3 beta-galactoside alpha-2,3-sialyltransferase 1 [Source:HGNC Symbol;Acc:HGNC:10862]	ST3GAL1	714.11	-0.494986	0.0516108	-9.59073	8.74613e-22	3.47822e-20
ENSG00000144560,15	9686	vestigial like family member 4 [Source:HGNC Symbol;Acc:HGNC:28966]	VGLL4	1937.36	-0.314174	0.0327903	-9.5813	9.58282e-22	3.80403e-20
ENSG00000110436,13	6506	solute carrier family 1 member 2 [Source:HGNC Symbol;Acc:HGNC:10940]	SLC1A2	1146.74	0.678722	0.0708633	9.57791	9.9033e-22	3.92411e-20
ENSG00000132334,16	5791	protein tyrosine phosphatase receptor type E [Source:HGNC Symbol;Acc:HGNC:9669]	PTPRE	231.898	-0.7106	0.0742062	-9.57603	1.00852e-21	3.98895e-20
ENSG00000003056,8	4074	mannose-6-phosphate receptor, cation dependent [Source:HGNC Symbol;Acc:HGNC:6752]	M6PR	468.851	0.53158	0.0555281	9.57316	1.03683e-21	4.08612e-20
ENSG00000213614,9	3073	hexosaminidase subunit alpha [Source:HGNC Symbol;Acc:HGNC:4878]	HEXA	385.457	-0.53808	0.0562071	-9.57317	1.03679e-21	4.08612e-20
[truncated: 1,630 more rows]

## Sheet: Cont-LDHB_Normo
ensembl_gene_id_version	entrezgene_id	description	external_gene_name	baseMean	log2FoldChange	lfcSE	stat	pvalue	padj
[truncated: 2,184 more rows]

[truncated: 3 more sheets: Cont-LDHB_Hypo, Cont-LDHAB_Normo, Cont-LDHAB_Hypo]
