# Supplementary material for: Specific expression of lactate dehydrogenases in glioblastoma controls intercellular lactate transfer to promote tumor growth and invasion
Source: Research Square preprint supplement (doi:10.21203/rs.3.rs-690811/v1), 2021-07-09
Supplement: Supplementary file 8 [file e7ea15f1477854c5dfcd65ea.xlsx]

## Sheet: SuppFig2a
BL13 wild type cell line
LDHA/Tubuline						Brown-Forsythe test			ANOVA summary			Dunnett's multiple comparisons test	Mean Diff,	95% CI of diff,	Significant?	Summary	Adjusted P Value
0h	6h	24h	48h	72h		F (DFn, DFd)	1,554 (4, 15)		F	12.43
0.0876033	0.271399	0.37594	0.939474	0.877451		P value	0.2373		P value	0.0001		0h vs. 6h	-0.082	-0,3453 to 0,1813	No	ns	0.8103
0.374781	0.261803	0.588764	0.662791	0.887295		P value summary	ns		P value summary	***		0h vs. 24h	-0.336	-0,5993 to -0,07269	Yes	*	0.0114
0.145958	0.29718	0.676329	0.796651	0.629442		Significantly different standard deviations? (P < 0.05)	No		Are differences among means statistically significant? (P < 0.05)	Yes		0h vs. 48h	-0.5323	-0,7956 to -0,2689	Yes	***	0.0002
0.299786	0.407143	0.612335	0.638831	0.509636					R square	0.7682		0h vs. 72h	-0.4985	-0,7618 to -0,2352	Yes	***	0.0004
LDHB/Tubuline						Brown-Forsythe test			ANOVA summary			Dunnett's multiple comparisons test	Mean Diff,	95% CI of diff,	Significant?	Summary	Adjusted P Value
0h	6h	24h	48h	72h		F (DFn, DFd)	0,1871 (4, 15)		F	1.437
1.80579	2.98539	2.32331	3.36842	2.19608		P value	0.9415		P value	0.2701		0h vs. 6h	-0.6985	-1,898 to 0,5011	No	ns	0.3535
2.8021	2.87554	3.8427	2.62791	2.56148		P value summary	ns		P value summary	ns		0h vs. 24h	-0.7183	-1,918 to 0,4813	No	ns	0.3312
2.49423	3.55748	3.79227	3.85167	3.19797		Significantly different standard deviations? (P < 0.05)	No		Are differences among means statistically significant? (P < 0.05)	No		0h vs. 48h	-0.6323	-1,832 to 0,5673	No	ns	0.4358
3.68308	4.16071	3.70044	3.46555	2.86938					R square	0.277		0h vs. 72h	-0.00975	-1,209 to 1,190	No	ns	> 0,9999

## Sheet: SuppFig2b
Lactate secretion in BL13 cell line (Relative Light Unit)
21% O2	0,1% O2		F test to compare variances			Unpaired t test
7354769	9999290		F,DFn, Dfd	1,865, 2, 2		P value	0.0009
6536656	9879967		P value	0.6982		P value summary	***
7195098	9399345		P value summary	ns		Significantly different? (P < 0.05)	Yes
			Significantly different? (P < 0.05)	No		One- or two-tailed P value?	Two-tailed
						t, df	t=8,799 df=4

## Sheet: SuppFig2c
LDHs activity in BL13 cell line (mOD/min @ 450nm)
21% O2	0,1% O2		F test to compare variances			Unpaired t test
41.2523	83.1715		F,DFn, Dfd	14,18, 2, 2		P value	0.0079
49.8291	116.979		P value	0.1317		P value summary	**
50.9489	118.52		P value summary	ns		Significantly different? (P < 0.05)	Yes
			Significantly different? (P < 0.05)	No		One- or two-tailed P value?	Two-tailed
						t, df	t=4,934 df=4

## Sheet: SuppFig2d
LDHB activity in BL13 cell line (mOD/min @ 450nm)
21% O2	0,1% O2		F test to compare variances			Unpaired t test
19.7915	18.6677		F,DFn, Dfd	1,278, 2, 2		P value	0.8097
15.2111	14.1531		P value	0.8779		P value summary	ns
21.6963	21.6372		P value summary	ns		Significantly different? (P < 0.05)	No
			Significantly different? (P < 0.05)	No		One- or two-tailed P value?	Two-tailed
						t, df	t=0,2572 df=4

## Sheet: SuppFig2e
Spheroid Growth for P3 cell line
Control	Lactate								Brown-Forsythe test			Kruskal-Wallis test			Dunn's multiple comparisons test	Mean rank diff,	Significant?	Summary	Adjusted P Value
-	1mM	10mM	20mM	30mM	40mM	50mM	100mM		F (DFn, DFd)	10,42 (7, 224)		P value	< 0,0001
19.23	12.52	14.08	14.88	-0.05	-32.36	-27.46	4.17		P value	< 0,0001		Exact or approximate P value?	Approximate		Control vs. 1mM	15.45	No	ns	> 0,9999
16.64	15.35	13.16	14.02	2.91	-31.28	-33.33	9.61		P value summary	****		P value summary	****		Control vs. 10mM	36.12	No	ns	0.2718
16.46	12.71	17.29	14.65	2.07	2.18	-37.44	9.12		Significantly different standard deviations? (P < 0.05)	Yes		Do the medians vary signif. (P < 0.05)	Yes		Control vs. 20mM	-2.225	No	ns	> 0,9999
18.17	13.03	19.23	10.66	3.86	-30.73	-24.89	15.65					Number of groups	8		Control vs. 30mM	101.4	Yes	****	< 0,0001
12.88	17.6	2.61	16.26	5.53	1.54	-37.79	10.57					Kruskal-Wallis statistic	164.7		Control vs. 40mM	121.2	Yes	****	< 0,0001
14.13	14.3	11.14	11.74	3.17	-2.81	-37.72	13.08								Control vs. 50mM	126	Yes	****	< 0,0001
21.29	11.65	9.6	14.41	4.68	1.74	-30.55	34.28								Control vs. 100mM	-27.72	No	ns	0.7686
12.78	10.17	13.13	12.71	-5.73	-25.12	-30.73	14.23
12.73	14.39	12.69	13.29	2.21	-35.67	-32.86	10.1
16.95	13.86	2.82	2.36	5.46	-34.21	-26.02	14.31
6.99	6.98	-0.07	6.72	-4.44	-35.73	-29.46	19.09
7.31	6.68	0.46	0.47	-15.71	-35.27	-26.73	25.82
6.82	4.12	2.31	-0.6	-12.3	-33.45	-23.45	16.24
6.98	9.21	1.99	-0.26	-23.73	-20.79	-22.45	7.95
6.97	2.29	3.95	5.89	-29.72	-31.92	-26.19	16.58
5.23	5.21	5.79	2.52	-25.04	-16.93	-28.05	9.29
10.86	5.42	6.82	3.04	-32.71	-22.87	-25.99	15.15
7.64	7.9	7.29	4.91	-30.11	-18.34	-31.24	21.32
15.54	7.66	5.52	1.84	-35.02	-35.1	-30.28	7.58
6.54	6	4.85	20.01	-14.97	-26.76	-30.38	9.52
12.51	3.25	2.38	16.68	-28.7	-19.09	-27.45	12.52
4.2	7.8	1.1	17.45	-25.77	-22.83	-24.05	11.34
5.26	4.99	1	12.35	-32.82	-29.57	-30.8	18.05
4.97	4.99	1.65	12.94	-30.99	-36.02	-17.42	19.8
11.16	6.59	0.3	15.81	-27.5	-12.51	-20.96	20.85
3.87	2.11	5.26	15.73	-29.79	-36.34	-24.5	21.39
7.26	4.8	1.1	19.47	-27.05	-25.77	-26.77	12.6
5.83	6	5.34	20.94	-28.86			16.91
4.99	6.78	2.28	15.98	-28.35			20.07
6.94	3.93			-27.61			7.75
Ratio fluorescence
Control	Lactate								Curve interpolation
-	1mM	10mM	20mM	30mM	40mM	50mM	100mM		Sigmoidal, 4PL, X is log(concentration)
96.49	97.12	94.49	98.69	46.88	97.76	0	0		Best-fit values
98.16	98.76	99.17	96.29	95.47	97.11	0	0		Top	99.01
93.71	97.34	91.78	79.21	0	0	0	0		Bottom	-0.3262
98.75	90.66	98.87	69.79	97.19	92.71	0	0		LogIC50	38.05
99.15	84.97	54.7	95.62	94.01	96.19	0	0		HillSlope	-0.04752
96.62	99.36	82.72	92.84	97.96	0	82.33	0		IC50	1.123e+38
94.26	98.54	93.47	0	99.13	93.16	82.62	0		Span	99.34
96.09	97.87	93.68	63.9	92.16	26.24	0	0		95% Confidence Intervals
97.84	83.93	90.1	76.46	84.64	48.81	26.03	0		Top	93,66 to 104,4
93.36	95.25	94.97	98.07	95.55	51.33	15.76	0		Bottom	-7,191 to 6,539
99.37	94.06	94.73	98.2	96.43	48.3	18.22			LogIC50	35,48 to 40,62
99.3	95.63	98.8	99.63	50	48.81	10.84	0		HillSlope	-0,05977 to -0,03528
98.22	99.4	96.69	97.2	97.97	48.26	25.31	0		IC50	3,035e+035 to +infinity
99.93	95.45	99.54	89.68	98.57	50	11.16	0		Span	90,03 to 108,7
97.5	97.6	96.38	95.98	51.72	48.66	22.89	0		Goodness of Fit
97.25	96.36	95.7	98.78	99.27	46.75	24.27	0		Degrees of Freedom	227
99.7	99.35	98.62	93.76	48.71	19.15	0	0		R square	0.7825
98.76	96.76	97.13	97.35	0	51.68	22.69	0		Adjusted R square	0.7796
99.4	98.79	93.77	98.28	0	31.17	13.64	0		Absolute Sum of Squares	80871
94.06	97.94	99.05	89.49	0	17.64	29.04	0		Replicates test for lack of fit
99.59	98.84	97.14	97.98	50.55	50.49	7.45	0		SD replicates	18.95
97.43	96.97	97.47	97.04	55.53	49.92	26.77	0		SD lack of fit	14.43
97.97	99.03	95.31	96.1	54.34	34.37	22.69	0		Discrepancy (F)	0.5802
99.51	98.36	96.41	99.52	50.54	17.61	18.49	0		P value	0.6773
98.57	97.03	98.88	96.37	51.67	0	18.43	0		Evidence of inadequate model?	No
98.57	97.48	94.24	93.46	49.11	50.14	11.97	0
98.06	97.8	95.4	97.38	96.85	49.67	36	0		Number of points
97.87	96.63	99.44	95.3	96.53			0		Analyzed	231
97.78	97.42	99.02	96.79	96.98			0
97.08	99.73			49.59			0

## Sheet: SuppFig2f
Cellular morphology of P3 cell line
Number of cells express as a foldchange to T0
24h		72h			Two-way RM ANOVA	Matching: Across row		Sidak's multiple comparisons test	Mean Diff	95% CI of diff	Significant?	Summary	Adjusted P Value
Control	LA 20 mM	Control	LA 20 mM		Alpha	0.05
1.3037	1.02143	7.07407	1					Cont - LA
1.21212	1.05738	7.2803	1.26229					24h	0.2298	-0,2268 to 0,6865	No	ns	0.4307
1.22835	1.03333	7.92913	0.9					7d	6.833	6,377 to 7,290	Yes	****	< 0,0001
1.18091	0.90303	8.63316	0.509091
1.25926	0.963542	8.03704	0.921875
1.27826	1.01333	9.13913	0.88
1.13655	0.995215	7.34136	0.995215
1.25	0.990148	6.88333	1.0197
1.19383		7.60793
Elongated cell (%) - Aspect ratio > 2,5
24h		72h			Two-way RM ANOVA	Matching: Across row		Sidak's multiple comparisons test	Mean Diff	95% CI of diff	Significant?	Summary	Adjusted P Value
Control	LA 20 mM	Control	LA 20 mM		Alpha	0.05
8.39695	25.1852	0.5923	34.375					Cont - LA
5.26316	29.661	0.868621	24.3697					24h	-16.44	-21,72 to -11,17	Yes	****	< 0,0001
4.87805	17.1171	0.914634	30					7d	-22.82	-28,09 to -17,55	Yes	****	< 0,0001
4.94505	26.3889	1.27005	6.41026
4.54545	17.6471	0.921273	23.9264
3.05343	22.1105	1.36852	23.8636
4.56621	18.9944	1.3098	23.5294
4.72103	17.8161	1.41414	24.6835
8.42105		1.0095
PCA values (morphology parameters)
Condition	AspectRatio	Area	Perimeter	Roundness	Solidity	FormFactor
Cont_T0	1.68867	1681.11	192.396	0.643394	0.84752	1.82245
Cont_T0	1.57875	1511.17	187.982	0.678887	0.826291	1.9515
Cont_T0	1.67789	1658.78	197.373	0.655854	0.833268	1.95778
Cont_T24h	1.67428	1920.77	225.02	0.646195	0.809055	2.20183
Cont_T24h	1.65248	1829.16	211.341	0.663681	0.82337	2.06133
Cont_T24h	1.58227	1938.25	211.138	0.674203	0.840058	1.92837
Cont_T0	1.60025	1560.55	187.984	0.683049	0.849915	1.8795
Cont_T0	1.63523	1644.01	191.07	0.666893	0.847246	1.86499
Cont_T0	1.66697	1611.24	192.202	0.671939	0.838842	1.92293
Cont_T24h	1.63487	1890.29	211.386	0.664409	0.839912	2.00007
Cont_T24h	1.60137	2076.79	221.438	0.676209	0.836887	2.0025
Cont_T24h	1.56355	1812.97	199.059	0.680577	0.856969	1.81806
LA_T0	1.73507	1515.87	186.779	0.636052	0.837797	1.93045
LA_T0	1.72962	1595.92	191.984	0.634978	0.833749	1.92738
LA_T0	1.76929	1646.07	202.477	0.617312	0.806316	2.0873
LA_T24h	2.11218	2073.98	242.283	0.569879	0.778399	2.42087
LA_T24h	2.25585	2096.78	238.418	0.561781	0.788463	2.34945
LA_T24h	1.99954	2076.78	227.732	0.573179	0.813699	2.10134
LA_T0	1.61209	1713.02	193.538	0.661001	0.848169	1.83264
LA_T0	1.59347	1493.97	185.943	0.671416	0.838363	1.89985
LA_T0	1.65537	1655.66	200.348	0.650769	0.822044	2.01347
LA_T24h	2.24992	1523.27	189.529	0.577885	0.870197	1.97457
LA_T24h	1.94824	2243.43	233.369	0.626249	0.825671	2.06077
Cont_T7d	1.39956	1645.44	190.371	0.740916	0.869902	1.88808
Cont_T7d	1.38233	1341.76	166.965	0.754394	0.881337	1.73567
Cont_T7d	1.38403	1569.83	179.706	0.7495	0.880735	1.75343
LA_T7d	2.44737	2164.89	278.535	0.520551	0.734917	3.08259
LA_T7d	2.23369	2364.42	293.777	0.545776	0.744254	3.15852
LA_T7d	2.26365	2424.67	281.199	0.531925	0.759711	2.77534
Cont_T7d	1.45609	1427.65	172.805	0.717584	0.875079	1.78078
Cont_T7d	1.43852	1650.24	185.296	0.724397	0.879805	1.76374
Cont_T7d	1.48365	1638.73	185.71	0.707316	0.879876	1.79971
LA_T7d	2.07462	3594.61	332.437	0.587922	0.814914	2.80265
LA_T7d	2.1778	2579.27	318.369	0.561443	0.751141	3.52007
Cont_T0	1.6773	1747.24	205.324	0.642171	0.823319	2.03233
Cont_T0	1.60569	1774.26	198.234	0.674912	0.85055	1.86027
Cont_T0	1.63088	1878.83	213.931	0.664537	0.828665	2.03636
Cont_T24h	1.62485	2081.65	235.141	0.661257	0.804882	2.25494
Cont_T24h	1.62278	2014.27	213.71	0.655804	0.841715	1.90231
Cont_T24h	1.71709	2063.42	231.472	0.637713	0.805954	2.19793
LA_T0	1.66657	1543.28	188.616	0.660619	0.83975	1.91563
LA_T0	1.65062	1667.03	195.91	0.654791	0.84087	1.90475
LA_T0	1.63394	1785.62	206.001	0.658416	0.833886	1.9729
LA_T24h	2.09865	2073.67	234.628	0.579074	0.798034	2.2688
LA_T24h	1.99324	2221.13	244.083	0.58819	0.791337	2.25125
LA_T24h	1.91305	2460.84	256.565	0.612568	0.793085	2.25063
Cont_T7d	1.42259	1609.02	183.432	0.735458	0.888818	1.76695
Cont_T7d	1.42097	1712.15	187.336	0.73462	0.892164	1.73123
Cont_T7d	1.41241	1531.67	176.776	0.737465	0.886074	1.72331
LA_T7d	2.08522	2442.7	283.158	0.592243	0.769752	2.90022
LA_T7d	2.0365	2233.99	260.555	0.597391	0.784202	2.67308
LA_T7d	2.38054	2706.36	329.785	0.539878	0.718574	3.53226

## Sheet: SuppFig2g
Spheroid invasion in P3 cell line
Ctrl	Pryruvate	HCl		Brown-Forsythe test			Kruskal-Wallis test			Dunn's multiple comparisons test	Mean rank diff,	Significant?	Summary	Adjusted P Value
1.49006	2.43385	1.25198		F (DFn, DFd)	7,258 (2, 66)		P value	< 0,0001
0.980976	3.37284	1.13179		P value	0.0014		Exact or approximate P value?	Approximate		Ctrl vs. Pyruvate	-36.28	Yes	****	< 0,0001
0.992418	3.44207	1.06354		P value summary	**		P value summary	****		Ctrl vs. HCl	-12.46	No	ns	0.0945
0.884969	3.72309	1.29032		Significantly different standard deviations? (P < 0.05)	Yes		Do the medians vary signif. (P < 0.05)	Yes		Pyruvate vs. HCl	23.82	Yes	***	0.0002
0.877717	3.53791	1.26003					Number of groups	3
1.04078	3.4785	1.44182					Kruskal-Wallis statistic	37.4
0.811148	3.13234	1.87509
0.921926	3.17649	1.59936
1.48988	2.51102	2.3249
1.37313	2.36711	2.7291
0.839381	2.4174	2.56746
1.01293	2.8436	2.77148
0.845191	2.5092	2.03344
0.807324	2.38206	2.25477
0.784474	2.33574	1.44569
0.847682	2.39924	1.06459
1.32658	1.83683	1.59801
1.10276	1.85508	0.590332
0.47972	1.93317	0.880789
0.996208	1.92574	1.5296
1.46561	1.37842	0.633303
1.00172		0.572878
0.745798		0.646941
0.881602		0.70095
