# Supplementary material for: Specific expression of lactate dehydrogenases in glioblastoma controls intercellular lactate transfer to promote tumor growth and invasion
Source: Research Square preprint supplement (doi:10.21203/rs.3.rs-690811/v1), 2021-07-09
Supplement: Supplementary file 9 [file f497eedd78d453917011b93b.xlsx]

## Sheet: Fig4b
Glucose consumption
Concentration (mM)
	sgCont			sgLDHA			sgLDHB			sgLDHA/B				Two-way RM ANOVA	Matching: Stacked		Sidak's multiple comparisons test	Mean Diff,	95% CI of diff,	Significant?	Summary	Adjusted P Value
24h	13.12	14.83	12.46	15.41	13.42	19.25	14.03	12.84	13.73	7.72	8.6	7.32		Alpha	0.05
48h	24.04	24.12	23.43	24.31	24.78	24.2	22.24	22.85	25.01	14.58	12.33	10.42					24h
																	sgCont vs. sgLDHA	-2.557	-6,607 to 1,494	No	ns	0.4726
																	sgCont vs. sgLDHB	-0.06333	-4,114 to 3,987	No	ns	> 0,9999
																	sgCont vs. sgLDHAB	5.59	1,539 to 9,641	Yes	**	0.0036
																	sgLDHA vs. sgLDHB	2.493	-1,557 to 6,544	No	ns	0.5075
																	sgLDHA vs. sgLDHAB	8.147	4,096 to 12,20	Yes	****	< 0,0001
																	sgLDHB vs. sgLDHAB	5.653	1,603 to 9,704	Yes	**	0.0032
																	48h
																	sgCont vs. sgLDHA	-0.5667	-4,617 to 3,484	No	ns	> 0,9999
																	sgCont vs. sgLDHB	0.4967	-3,554 to 4,547	No	ns	> 0,9999
																	sgCont vs. sgLDHAB	11.42	7,369 to 15,47	Yes	****	< 0,0001
																	sgLDHA vs. sgLDHB	1.063	-2,987 to 5,114	No	ns	0.9976
																	sgLDHA vs. sgLDHAB	11.99	7,936 to 16,04	Yes	****	< 0,0001
																	sgLDHB vs. sgLDHAB	10.92	6,873 to 14,97	Yes	****	< 0,0001
Fractional enrichment (%)
	sgCont			sgLDHA			sgLDHB			sgLDHA/B
24h	96.4	95.87	95.5	96.01	96.15	96	96.03	95.81	96.02	95.71	96.58	96.47
48h	96.06	95.65	96.23	96.26	95.96	96.84	96.85	96.43	96.12	95.85	96.7	96.31
Pyruvate
Concentration (mM)
	sgCont			sgLDHA			sgLDHB			sgLDHA/B				Two-way RM ANOVA	Matching: Stacked		Sidak's multiple comparisons test	Mean Diff,	95% CI of diff,	Significant?	Summary	Adjusted P Value
24h	0	0	0	0	0	0	0	0	0	1.26	1.33	1.39		Alpha	0.05
48h	0	0	0	0	0	0	0	0	0	2.12	2.24	2.31					24h
																	sgCont vs. sgLDHA	0	-0,1115 to 0,1115	No	ns	> 0,9999
																	sgCont vs. sgLDHB	0	-0,1115 to 0,1115	No	ns	> 0,9999
																	sgCont vs. sgLDHAB	-1.327	-1,438 to -1,215	Yes	****	< 0,0001
																	sgLDHA vs. sgLDHB	0	-0,1115 to 0,1115	No	ns	> 0,9999
																	sgLDHA vs. sgLDHAB	-1.327	-1,438 to -1,215	Yes	****	< 0,0001
																	sgLDHB vs. sgLDHAB	-1.327	-1,438 to -1,215	Yes	****	< 0,0001
																	48h
																	sgCont vs. sgLDHA	0	-0,1115 to 0,1115	No	ns	> 0,9999
																	sgCont vs. sgLDHB	0	-0,1115 to 0,1115	No	ns	> 0,9999
																	sgCont vs. sgLDHAB	-2.223	-2,335 to -2,112	Yes	****	< 0,0001
																	sgLDHA vs. sgLDHB	0	-0,1115 to 0,1115	No	ns	> 0,9999
																	sgLDHA vs. sgLDHAB	-2.223	-2,335 to -2,112	Yes	****	< 0,0001
																	sgLDHB vs. sgLDHAB	-2.223	-2,335 to -2,112	Yes	****	< 0,0001
Fractional enrichment (%)
	sgCont			sgLDHA			sgLDHB			sgLDHA/B
24h	0	0	0	0	0	0	0	0	0	90.34	89.41	89.51
48h	0	0	0	0	0	0	0	0	0	91.87	92.05	92.27
Lactate
Concentration (mM)
	sgCont			sgLDHA			sgLDHB			sgLDHA/B				Two-way RM ANOVA	Matching: Stacked		Sidak's multiple comparisons test	Mean Diff,	95% CI of diff,	Significant?	Summary	Adjusted P Value
24h	23.83	21.72	24.06	20.75	22.28	15.36	19.3	20.05	19.62	0	0	0		Alpha	0.05
48h	30.8	29.84	31.14	28.53	28.62	29.28	31.24	30.3	28.78	0	0	0					24h
																	sgCont vs. sgLDHA	3.74	-0,2415 to 7,722	No	ns	0.0755
																	sgCont vs. sgLDHB	3.547	-0,4348 to 7,528	No	ns	0.1043
																	sgCont vs. sgLDHAB	23.2	19,22 to 27,18	Yes	****	< 0,0001
																	sgLDHA vs. sgLDHB	-0.1933	-4,175 to 3,788	No	ns	> 0,9999
																	sgLDHA vs. sgLDHAB	19.46	15,48 to 23,44	Yes	****	< 0,0001
																	sgLDHB vs. sgLDHAB	19.66	15,68 to 23,64	Yes	****	< 0,0001
																	48h
																	sgCont vs. sgLDHA	1.783	-2,198 to 5,765	No	ns	0.8686
																	sgCont vs. sgLDHB	0.4867	-3,495 to 4,468	No	ns	> 0,9999
																	sgCont vs. sgLDHAB	30.59	26,61 to 34,57	Yes	****	< 0,0001
																	sgLDHA vs. sgLDHB	-1.297	-5,278 to 2,685	No	ns	0.9848
																	sgLDHA vs. sgLDHAB	28.81	24,83 to 32,79	Yes	****	< 0,0001
																	sgLDHB vs. sgLDHAB	30.11	26,13 to 34,09	Yes	****	< 0,0001
Fractional enrichment (%)
	sgCont			sgLDHA			sgLDHB			sgLDHA/B
24h	97.97	99.07	97.94	98.35	97.73	98.12	98.12	97.34	97.97	0	0	0
48h	97.46	97.8	97.6	97.62	97.52	97.65	97.31	97.18	97.61	0	0	0
Acetate
Concentration (mM)
	sgCont			sgLDHA			sgLDHB			sgLDHA/B				Two-way RM ANOVA	Matching: Stacked		Sidak's multiple comparisons test	Mean Diff,	95% CI of diff,	Significant?	Summary	Adjusted P Value
24h	0	0	0	0	0	0	0	0	0	0.46	0.51	0.53		Alpha	0.05
48h	0	0	0	0	0	0	0	0	0	1.46	1.55	1.61					24h
																	sgCont vs. sgLDHA	0	-0,08036 to 0,08036	No	ns	> 0,9999
																	sgCont vs. sgLDHB	0	-0,08036 to 0,08036	No	ns	> 0,9999
																	sgCont vs. sgLDHAB	-0.5	-0,5804 to -0,4196	Yes	****	< 0,0001
																	sgLDHA vs. sgLDHB	0	-0,08036 to 0,08036	No	ns	> 0,9999
																	sgLDHA vs. sgLDHAB	-0.5	-0,5804 to -0,4196	Yes	****	< 0,0001
																	sgLDHB vs. sgLDHAB	-0.5	-0,5804 to -0,4196	Yes	****	< 0,0001
																	48h
																	sgCont vs. sgLDHA	0	-0,08036 to 0,08036	No	ns	> 0,9999
																	sgCont vs. sgLDHB	0	-0,08036 to 0,08036	No	ns	> 0,9999
																	sgCont vs. sgLDHAB	-1.54	-1,620 to -1,460	Yes	****	< 0,0001
																	sgLDHA vs. sgLDHB	0	-0,08036 to 0,08036	No	ns	> 0,9999
																	sgLDHA vs. sgLDHAB	-1.54	-1,620 to -1,460	Yes	****	< 0,0001
																	sgLDHB vs. sgLDHAB	-1.54	-1,620 to -1,460	Yes	****	< 0,0001
Fractional enrichment (%)
	sgCont			sgLDHA			sgLDHB			sgLDHA/B
24h	0	0	0	0	0	0	0	0	0	89.6	90.2	88.72
48h	0	0	0	0	0	0	0	0	0	91.41	90.76	90.64
Formate
Concentration (mM)
	sgCont			sgLDHA			sgLDHB			sgLDHA/B				Two-way RM ANOVA	Matching: Stacked		Sidak's multiple comparisons test	Mean Diff,	95% CI of diff,	Significant?	Summary	Adjusted P Value
24h	0	0	0	0	0	0	0	0	0	0.29	0.25	0.3		Alpha	0.05
48h	0	0	0	0	0	0	0	0	0	0.39	0.43	0.41					24h
																	sgCont vs. sgLDHA	0	-0,03186 to 0,03186	No	ns	> 0,9999
																	sgCont vs. sgLDHB	0	-0,03186 to 0,03186	No	ns	> 0,9999
																	sgCont vs. sgLDHAB	-0.28	-0,3119 to -0,2481	Yes	****	< 0,0001
																	sgLDHA vs. sgLDHB	0	-0,03186 to 0,03186	No	ns	> 0,9999
																	sgLDHA vs. sgLDHAB	-0.28	-0,3119 to -0,2481	Yes	****	< 0,0001
																	sgLDHB vs. sgLDHAB	-0.28	-0,3119 to -0,2481	Yes	****	< 0,0001
																	48h
																	sgCont vs. sgLDHA	0	-0,03186 to 0,03186	No	ns	> 0,9999
																	sgCont vs. sgLDHB	0	-0,03186 to 0,03186	No	ns	> 0,9999
																	sgCont vs. sgLDHAB	-0.41	-0,4419 to -0,3781	Yes	****	< 0,0001
																	sgLDHA vs. sgLDHB	0	-0,03186 to 0,03186	No	ns	> 0,9999
																	sgLDHA vs. sgLDHAB	-0.41	-0,4419 to -0,3781	Yes	****	< 0,0001
																	sgLDHB vs. sgLDHAB	-0.41	-0,4419 to -0,3781	Yes	****	< 0,0001
Fractional enrichment (%)
	sgCont			sgLDHA			sgLDHB			sgLDHA/B
24h	0	0	0	0	0	0	0	0	0	45.03	43.69	47.78
48h	0	0	0	0	0	0	0	0	0	51.61	52.47	51.37
