# Supplementary material for: Specific expression of lactate dehydrogenases in glioblastoma controls intercellular lactate transfer to promote tumor growth and invasion
Source: Research Square preprint supplement (doi:10.21203/rs.3.rs-690811/v1), 2021-07-09
Supplement: Supplementary file 11 [file 1133d04ce4e672aa3e68a0c7.xlsx]

## Sheet: Primary Ab
Antibody	Manufacturer	Cat. No.	Host	Working dilution	Application
Annexin V
ATP5A	Abcam	ab14748	Mouse		WB
CD31	BD Pharmingen	553370	Rat	1/100	IF
COXII	Abcam	ab110258	Mouse		WB
LDHA	Santa Cruz Biotechnology	sc-137243	Mouse	1/100	IF
LDHA	Cell Signaling Technology	C4B5	Rabbit	1/1000	WB
LDHB			Mouse	1/2000	WB
LDHB	Merck	ABC927	Rabbit	1/250	IF
NDUFB8	Abcam	ab110242	Mouse		WB
Nestin (10C2)	Thermo Fisher Scientific	MA1-110	Mouse	1/500	IF
SDHA	Abcam	ab14715	Mouse		WB
Tom20	Santa Cruz Biotechnology	sc-11415	Rabbit	1/200	IF
Tubulin	Merck	T5168	Mouse	1/5000	WB
UQCRC2	Abcam	ab14745	Mouse		WB
Vinculin	Merck	V9131	Mouse	1/5000	WB

## Sheet: Secondary Ab
Antibody	Manufacturer	Cat. No.	Working dilution	Application
568-conjugated Donkey anti-Mouse IgG (H+L)			1/500	IF
568-conjugated Donkey anti-Rabbit IgG (H+L)			1/500	IF
568-conjugated Donkey anti-Rat IgG (H+L)			1/500	IF
AlexaFluor 488-conjugated Donkey anti-Mouse IgG (H+L)	Invitrogen	A-21202	1/500	IF
AlexaFluor 488-conjugated Donkey anti-Rabbit IgG (H+L)	Invitrogen	A-21206	1/500	IF
IRDye 680 donkey anti-Mouse	Licor	926-68022	1/5000	WB
IRDye 680 donkey anti-Rabbit	Licor	926-68023	1/5000	WB
IRDye 800 donkey anti-Mouse	Licor	926-32212	1/5000	WB
IRDye 800 donkey anti-Rabbit	Licor	926-32213	1/5000	WB

## Sheet: Fluoro-molecule
Molecule	Manufacturer	Cat. No.	Working dilution	Application
Calcein AM	Thermo Fisher Scientific	L3224	1/5000	IF
DAPI	Thermo Fisher Scientific	D1306	1/2000	IF
Ethidium Homodimer-1	Thermo Fisher Scientific	L3224	1/1000	IF
Phalloidin Rhodamine	Thermo Fisher Scientific	R415	1/100	IF

## Sheet: Products
Product	Category	Manufacturer	Cat. No.
96-well flat-bottom plate	Plastic	Falcon	353072
96-well round-bottom plate	Plastic	Falcon	8772212
Accutase	Enzyme	Corning	25058CI
B27	Supplement	Gibco	12587010
basic Fibroblast Growth Factor	Supplement	PeproTech	10018B
BCA protein assay kit	Reagent			Réf à l'IBGC ?
Blasticidin	Drug	Gibco	461120
BMS-309403	Drug	MedChemExpress	HY-10903	Anticorps FABPi
Bovine serum albumin	Reagent	Euromedex	04100812C
Collagen type I	Reagent	Corning	354236
Glucose 13C6
HEPES	Supplement	Sigma	H0887
Lactate 13C6
Lactic acid	Reagent	Acros Organics	125065000
lentiCRISPR v2 vector - blasticidin	Plasmid	Addgene	83480
lentiCRISPR v2 vector - puromycin	Plasmid	Addgene	52961
Matrigel matrix	Reagent	Corning	354230
Methylcellulose 400cp	Reagent	Sigma	M0262
NeuroBasal medium	Medium	Gibco	21103049
NeuroBasal-A medium	Medium	Gibco	A2477501
Opti-MEM	Medium	Gibco	31985070
Paraformaldehyde solution 4%	Reagent	ChemCruz	sc-281692
Penicillin - Streptomycin	Antibiotics	Gibco	15140122
Phenformin hydrochloride	Drug	Sigma	P7045-10G
Phosphate-buffered saline	Reagent	Gibco	14190-094
pMD2.G	Plasmid	Addgene	12259
Polybrene	Reagent	Sigma	TR1003G
Prolong Gold antifade reagent	Reagent	Invitrogen	P36934
Protease inhibitor coktail	Reagent	Promega	G6521
psPAX2	Plasmid	Addgene	12260
Puromycin	Drug	Gibco	A1113803
Rotenone	Drug	Enzo	ALX-350-360-G005
Stiripentol	Drug	Biocodex	D306
