# Supplementary material for: Specific expression of lactate dehydrogenases in glioblastoma controls intercellular lactate transfer to promote tumor growth and invasion
Source: Research Square preprint supplement (doi:10.21203/rs.3.rs-690811/v1), 2021-07-09
Supplement: Supplementary file 12 [file 472a0780cd066cc2ea82f33d.xlsx]

## Sheet: Fig5a
WB
Complex I - NDUFB8
21% O2
sgCont	sgLDHA	sgLDHB	sgLDHA/B		Brown-Forsythe test			ANOVA summary			Dunnett's multiple comparisons test	Mean Diff,	95% CI of diff,	Significant?	Summary	Adjusted P Value
0.119342	0.290213	0.160851	0.228417		F (DFn, DFd)	0,6287 (3, 8)		F	0.6419
0.118166	0.0722634	0.03721	0.0702928		P value	0.6166		P value	0.6093		sgCont vs. sgLDHA	-0.04167	-0,4291 to 0,3458	No	ns	0.9789
0.31798	0.318296	0.149174	0.595399		P value summary	ns		P value summary	ns		sgCont vs. sgLDHB	0.06933	-0,3181 to 0,4568	No	ns	0.9167
					Significantly different standard deviations? (P < 0.05)	No		Are differences among means statistically significant? (P < 0.05)	No		sgCont vs. sgLDHA/B	-0.1127	-0,5001 to 0,2748	No	ns	0.7454
								R square	0.194
0,1% O2
sgCont	sgLDHA	sgLDHB	sgLDHA/B		Brown-Forsythe test			ANOVA summary			Dunnett's multiple comparisons test	Mean Diff,	95% CI of diff,	Significant?	Summary	Adjusted P Value
0.0592737	0.178386	0.136454	1.36268		F (DFn, DFd)	0,6278 (3, 8)		F	10.5
0.0131957	0.0279351	0.0258743	0.662589		P value	0.6171		P value	0.0038		sgCont vs. sgLDHA	-0.04133	-0,5432 to 0,4605	No	ns	0.9902
0.250678	0.240952	0.15567	0.729118		P value summary	ns		P value summary	**		sgCont vs. sgLDHB	0.001667	-0,5002 to 0,5035	No	ns	> 0,9999
					Significantly different standard deviations? (P < 0.05)	No		Are differences among means statistically significant? (P < 0.05)	Yes		sgCont vs. sgLDHA/B	-0.8107	-1,312 to -0,3088	Yes	**	0.0042
								R square	0.7974
Complex II SDHA
21% O2
sgCont	sgLDHA	sgLDHB	sgLDHA/B		Brown-Forsythe test			ANOVA summary			Dunnett's multiple comparisons test	Mean Diff,	95% CI of diff,	Significant?	Summary	Adjusted P Value
0.546441	0.752478	0.902501	0.996287		F (DFn, DFd)	0,3608 (3, 8)		F	0.8942
0.639776	0.662556	0.704734	0.619416		P value	0.7831		P value	0.4848		sgCont vs. sgLDHA	0.02657	-0,3883 to 0,4414	No	ns	0.9952
0.971892	0.663373	1.03104	0.9749		P value summary	ns		P value summary	ns		sgCont vs. sgLDHB	-0.1601	-0,5749 to 0,2548	No	ns	0.5749
					Significantly different standard deviations? (P < 0.05)	No		Are differences among means statistically significant? (P < 0.05)	No		sgCont vs. sgLDHA/B	-0.1442	-0,5590 to 0,2707	No	ns	0.6433
								R square	0.2511
0,1% O2
sgCont	sgLDHA	sgLDHB	sgLDHA/B		Brown-Forsythe test			ANOVA summary			Dunnett's multiple comparisons test	Mean Diff,	95% CI of diff,	Significant?	Summary	Adjusted P Value
0.598756	0.655811	0.753283	1.37644		F (DFn, DFd)	0,3625 (3, 8)		F	8.623
0.596795	0.583371	0.750977	1.22253		P value	0.782		P value	0.0069		sgCont vs. sgLDHA	0.05369	-0,3148 to 0,4221	No	ns	0.9512
0.818891	0.614185	1.12914	1.01333		P value summary	ns		P value summary	**		sgCont vs. sgLDHB	-0.2063	-0,5748 to 0,1621	No	ns	0.3131
					Significantly different standard deviations? (P < 0.05)	No		Are differences among means statistically significant? (P < 0.05)	Yes		sgCont vs. sgLDHA/B	-0.5326	-0,9011 to -0,1642	Yes	**	0.008
								R square	0.7638
Complex III - UQCRC2
21% O2
sgCont	sgLDHA	sgLDHB	sgLDHA/B		Brown-Forsythe test			ANOVA summary			Dunnett's multiple comparisons test	Mean Diff,	95% CI of diff,	Significant?	Summary	Adjusted P Value
0.340424	0.57092	0.622925	0.664737		F (DFn, DFd)	0,1328 (3, 8)		F	0.0483
0.454045	0.452301	0.405158	0.275855		P value	0.9378		P value	0.9849		sgCont vs. sgLDHA	-0.07583	-0,7416 to 0,5900	No	ns	0.9752
0.905199	0.903941	0.860248	0.981342		P value summary	ns		P value summary	ns		sgCont vs. sgLDHB	-0.06289	-0,7287 to 0,6029	No	ns	0.9853
					Significantly different standard deviations? (P < 0.05)	No		Are differences among means statistically significant? (P < 0.05)	No		sgCont vs. sgLDHA/B	-0.07409	-0,7399 to 0,5917	No	ns	0.9768
								R square	0.01779
0,1% O2
sgCont	sgLDHA	sgLDHB	sgLDHA/B		Brown-Forsythe test			ANOVA summary			Dunnett's multiple comparisons test	Mean Diff,	95% CI of diff,	Significant?	Summary	Adjusted P Value
0.314466	0.405298	0.471048	1.30774		F (DFn, DFd)	0,4634 (3, 8)		F	7.081
0.203423	0.20392	0.268995	1.13567		P value	0.7156		P value	0.0122		sgCont vs. sgLDHA	-0.05217	-0,5916 to 0,4872	No	ns	0.9843
0.462438	0.527635	0.92606	0.849275		P value summary	ns		P value summary	*		sgCont vs. sgLDHB	-0.2286	-0,7680 to 0,3108	No	ns	0.5098
					Significantly different standard deviations? (P < 0.05)	No		Are differences among means statistically significant? (P < 0.05)	Yes		sgCont vs. sgLDHA/B	-0.7708	-1,310 to -0,2314	Yes	**	0.0086
								R square	0.7264
Complex IV - COVII
21% O2
sgCont	sgLDHA	sgLDHB	sgLDHA/B		Brown-Forsythe test			ANOVA summary			Dunnett's multiple comparisons test	Mean Diff,	95% CI of diff,	Significant?	Summary	Adjusted P Value
0.283921	0.713804	0.526841	0.776437		F (DFn, DFd)	0,4080 (3, 8)		F	0.9467
0.271021	0.276904	0.233502	0.319568		P value	0.7516		P value	0.4626		sgCont vs. sgLDHA	-0.06272	-0,7387 to 0,6133	No	ns	0.9861
0.790579	0.542983	0.366456	1.14953		P value summary	ns		P value summary	ns		sgCont vs. sgLDHB	0.07291	-0,6031 to 0,7489	No	ns	0.9787
					Significantly different standard deviations? (P < 0.05)	No		Are differences among means statistically significant? (P < 0.05)	No		sgCont vs. sgLDHA/B	-0.3	-0,9760 to 0,3760	No	ns	0.4769
								R square	0.262
0,1% O2
sgCont	sgLDHA	sgLDHB	sgLDHA/B		Brown-Forsythe test			ANOVA summary			Dunnett's multiple comparisons test	Mean Diff,	95% CI of diff,	Significant?	Summary	Adjusted P Value
0.169267	0.375741	0.281769	1.43364		F (DFn, DFd)	0,7238 (3, 20)		F	16.52
0.0757059	0.113908	0.0902866	0.855083		P value	0.5496		P value	< 0,0001		sgCont vs. sgLDHA	-0.0494	-0,3791 to 0,2803	No	ns	0.9636
0.446389	0.341614	0.226806	0.835372		P value summary	ns		P value summary	****		sgCont vs. sgLDHB	-0.09888	-0,4286 to 0,2308	No	ns	0.7884
					Significantly different standard deviations? (P < 0.05)	No		Are differences among means statistically significant? (P < 0.05)	Yes		sgCont vs. sgLDHA/B	-0.7908	-1,121 to -0,4612	Yes	****	< 0,0001
								R square	0.7124
Complex V - ATP5A
21% O2
sgCont	sgLDHA	sgLDHB	sgLDHA/B		Brown-Forsythe test			ANOVA summary			Dunnett's multiple comparisons test	Mean Diff,	95% CI of diff,	Significant?	Summary	Adjusted P Value
1.11983	1.20075	1.16367	1.23009		F (DFn, DFd)	0,5246 (3, 8)		F	0.4013
1.01593	1.07341	0.909176	0.751305		P value	0.6775		P value	0.756		sgCont vs. sgLDHA	0.05031	-0,4263 to 0,5269	No	ns	0.98
1.42125	1.13193	0.955461	1.3384		P value summary	ns		P value summary	ns		sgCont vs. sgLDHB	0.1762	-0,3004 to 0,6529	No	ns	0.6034
					Significantly different standard deviations? (P < 0.05)	No		Are differences among means statistically significant? (P < 0.05)	No		sgCont vs. sgLDHA/B	0.07907	-0,3976 to 0,5557	No	ns	0.9314
								R square	0.1308
0,1% O2
sgCont	sgLDHA	sgLDHB	sgLDHA/B		Brown-Forsythe test			ANOVA summary			Dunnett's multiple comparisons test	Mean Diff,	95% CI of diff,	Significant?	Summary	Adjusted P Value
0.762559	1.07735	0.859475	1.29329		F (DFn, DFd)	0,9875 (3, 20)		F	4.752
0.742585	0.735224	0.849938	1.13965		P value	0.4187		P value	0.0116		sgCont vs. sgLDHA	-0.06103	-0,4898 to 0,3677	No	ns	0.9685
1.06849	0.970745	1.07417	1.28281		P value summary	ns		P value summary	*		sgCont vs. sgLDHB	-0.1493	-0,5780 to 0,2795	No	ns	0.7102
					Significantly different standard deviations? (P < 0.05)	No		Are differences among means statistically significant? (P < 0.05)	Yes		sgCont vs. sgLDHA/B	-0.5757	-1,004 to -0,1470	Yes	**	0.0075
								R square	0.4162

## Sheet: Fig5b
Mitochondria
Mitochondrial mass
sgCONT	sgLDHA	sgLDHB	sgLDHAB		Brown-Forsythe test			ANOVA summary			Tukey's multiple comparisons test	Mean Diff,	95% CI of diff,	Significant?	Summary	Adjusted P Value
11.8158	9.34983	3.36302	25.2262		F (DFn, DFd)	1,653 (3, 115)		F	5.563
10.1058	14.0455	7.92727	19.8378		P value	0.1811		P value	0.0013		sgCONT vs. sgLDHA	0.000368	-3,664 to 3,665	No	ns	> 0,9999
11.1005	9.10058	12.4008	6.31965		P value summary	ns		P value summary	**		sgCONT vs. sgLDHB	0.08397	-3,647 to 3,815	No	ns	> 0,9999
11.6856	6.16041	9.7792	19.0719		Significantly different standard deviations? (P < 0.05)	No		Are differences among means statistically significant? (P < 0.05)	Yes		sgCONT vs. sgLDHAB	-4.798	-8,494 to -1,101	Yes	**	0.0053
18.1648	5.89974	6.97818	11.2657					R square	0.1267		sgLDHA vs. sgLDHB	0.08361	-3,705 to 3,872	No	ns	> 0,9999
9.92585	7.70034	22.6865	21.982								sgLDHA vs. sgLDHAB	-4.798	-8,553 to -1,043	Yes	**	0.0063
17.0639	11.4581	9.22194	12.9169								sgLDHB vs. sgLDHAB	-4.882	-8,702 to -1,061	Yes	**	0.0063
24.9196	16.1073	12.0774	19.0947
16.4065	8.66694	11.7519	15.0137
7.35496	18.919	6.13701	9.77929
12.9992	7.8456	6.03194	19.4361
8.33443	9.67545	3.87834	11.4211
9.45914	17.313	8.59363	22.5092
10.7614	12.4359	7.93027	11.4193
10.2678	18.5702	9.87466	12.7076
12.1887	17.3152	10.429	12.5489
9.83554	12.4574	6.52523	21.8308
5.28881	11.3261	12.5907	16.032
9.99971	16.2603	19.8458	20.7408
4.7684	12.3525	9.63396	9.61203
7.86595	7.56173	6.82879	11.3084
11.3175	11.3261	28.3925	10.5668
9.20678	16.2603	6.09238	11.4339
11.5027	12.3525	32.2993	20.7233
9.81413	7.56173	7.0081	26.2875
16.0145	7.78496	5.93012	18.9938
8.42751	8.87157	19.8421	11.6208
4.95097	4.31249	16.6573	18.1184
6.24837	16.2699		25.907
26.9703	10.8624
10.4163
14.0283
Network Aspect Ratio
sgCONT	sgLDHA	sgLDHB	sgLDHAB		Brown-Forsythe test			ANOVA summary			Tukey's multiple comparisons test	Mean Diff,	95% CI of diff,	Significant?	Summary	Adjusted P Value
2.6235	2.5286	2.76077	2.603		F (DFn, DFd)	1,419 (3, 115)		F	3.966
2.221	2.18864	2.054	2.00192		P value	0.2408		P value	0.0099		sgCONT vs. sgLDHA	-0.02628	-0,3159 to 0,2633	No	ns	0.9953
1.77043	1.958	3.10969	1.695		P value summary	ns		P value summary	**		sgCONT vs. sgLDHB	0.001743	-0,2931 to 0,2966	No	ns	> 0,9999
2.15254	1.79339	2.31662	2.13688		Significantly different standard deviations? (P < 0.05)	No		Are differences among means statistically significant? (P < 0.05)	Yes		sgCONT vs. sgLDHAB	0.3127	0,02052 to 0,6049	Yes	*	0.0309
1.73328	3.50839	2.41646	1.92863					R square	0.09376		sgLDHA vs. sgLDHB	0.02803	-0,2714 to 0,3275	No	ns	0.9949
1.64027	2.17312	2.01435	2.12876								sgLDHA vs. sgLDHAB	0.339	0,04221 to 0,6357	Yes	*	0.0183
1.76175	2.54986	1.76464	1.84392								sgLDHB vs. sgLDHAB	0.3109	0,009024 to 0,6129	Yes	*	0.0409
4.36991	1.86067	1.58633	2.14247
1.601	2.06278	2.20485	1.6645
2.26489	2.44392	2.67006	1.68421
2.36254	2.54552	2.52284	2.05376
2.66246	2.52678	2.46992	1.887
2.794	2.494	2.23378	3.19454
2.29329	2.16379	2.2425	2.09167
2.4901	2.49309	2.5954	2.363
2.22952	2.29212	2.34922	1.95015
2.39472	1.9515	2.21833	1.61033
2.64505	2.25886	2.66581	1.7497
3.57177	2.12609	2.29906	2.56083
1.7001	2.88327	1.97063	1.58119
2.03875	1.92056	1.94752	1.746
1.79674	2.25886	2.17379	1.76939
2.39997	2.12609	1.96058	2.15955
3.055	2.88327	2.91795	1.77992
1.93555	1.92056	2.73661	1.5435
2.72708	2.35558	2.39247	2.21
2.05543	2.90277	2.36283	2.24824
1.89523	1.82414	2.2615	2.27386
2.16412	3.05111		1.9283
2.17329	2.67243
2.41417
2.65378

## Sheet: Fig5c
Oxygraphy
Respiration JO2 (nmol/min/mg of protein)
Basal				Non phos				Uncoupled					Two-way ANOVA	Ordinary		Tukey's multiple comparisons test	Mean Diff,	95% CI of diff,	Significant?	Summary	Adjusted P Value
sgCont	sgLDHA	sgLDHB	sgLDHAB	sgCont	sgLDHA	sgLDHB	sgLDHAB	sgCont	sgLDHA	sgLDHB	sgLDHAB		Alpha	0.05
16.2	24.8	22.5	22.7	11	14.8	13.8	15.9	23.6	34.5	33.9	54.3					Basal
15.3	16.2	16.4		11.1	9.7	10		21.9	24.5	26.9						sgCont vs. sgLDHA	0.02727	-13,23 to 13,29	No	ns	> 0,9999
17.5	15	8.6		14.9	10.5	6.2		28.1	20	16.9						sgCont vs. sgLDHB	0.2219	-12,52 to 12,96	No	ns	> 0,9999
10.9917	10.3331	11.1568	16.5672	2.23152	2.67634	3.59286	5.05355	17.8461	17.3769	18.6301	24.7889					sgCont vs. sgLDHAB	-7.6	-21,56 to 6,357	No	ns	0.7844
25.5512	14.1572	15.9954	24.636	6.7666	5.28489	6.58286	8.28205	44.5205	22.3121	28.6469	44.9897					sgLDHA vs. sgLDHB	0.1946	-13,07 to 13,46	No	ns	> 0,9999
15.2706	25.5895	21.0596	36.1651	5.71753	9.2234	8.78156	14.0676	30.7497	42.555	36.6807	56.872					sgLDHA vs. sgLDHAB	-7.628	-22,06 to 6,806	No	ns	0.8146
23.1372		26.6859	26.4698	8.99712		10.0127	8.4421	36.2612			42.376					sgLDHB vs. sgLDHAB	-7.822	-21,78 to 6,135	No	ns	0.7527
																Non Phos
																sgCont vs. sgLDHA	-0.02419	-13,29 to 13,24	No	ns	> 0,9999
																sgCont vs. sgLDHB	0.249	-12,49 to 12,99	No	ns	> 0,9999
																sgCont vs. sgLDHAB	-1.676	-15,63 to 12,28	No	ns	> 0,9999
																sgLDHA vs. sgLDHB	0.2732	-12,99 to 13,53	No	ns	> 0,9999
																sgLDHA vs. sgLDHAB	-1.652	-16,09 to 12,78	No	ns	> 0,9999
																sgLDHB vs. sgLDHAB	-1.925	-15,88 to 12,03	No	ns	> 0,9999
																Uncoupled
																sgCont vs. sgLDHA	2.123	-11,14 to 15,38	No	ns	> 0,9999
																sgCont vs. sgLDHB	2.054	-11,21 to 15,32	No	ns	> 0,9999
																sgCont vs. sgLDHAB	-15.67	-29,63 to -1,712	Yes	*	0.0153
																sgLDHA vs. sgLDHB	-0.06895	-13,83 to 13,69	No	ns	> 0,9999
																sgLDHA vs. sgLDHAB	-17.79	-32,22 to -3,358	Yes	**	0.0048
																sgLDHB vs. sgLDHAB	-17.72	-32,16 to -3,289	Yes	**	0.005
Inhibitor sensibility (% of JO2 Uncoupled)
Rotenone				Atpenin A5				Antimycin A					Two-way ANOVA	Ordinary		Tukey's multiple comparisons test	Mean Diff,	95% CI of diff,	Significant?	Summary	Adjusted P Value
sgCont	sgLDHA	sgLDHB	sgLDHAB	sgCont	sgLDHA	sgLDHB	sgLDHAB	sgCont	sgLDHA	sgLDHB	sgLDHAB		Alpha	0.05
92.3077	95.2381	90.9091	82.0513	0	0	4.54545	2.5641	15.3846	4.7619	4.54545	15.3846					Rotenone
85.7143	105.263	109.375	76.906	0.751518	15.7895	0	1.6153	4.7619	21.0526	15.7404	21.4787					sgCont vs. sgLDHA	8.146	-20,56 to 36,85	No	ns	0.9975
73.6842	31.25	82.2802	74.3284	15.7895	37.5	1.97934	4.05703	10.5263	31.25	22.2222	60.2107					sgCont vs. sgLDHB	-2.343	-29,27 to 24,59	No	ns	> 0,9999
93.8108	80.8575	87.9182	80.2929	1.03854	0.601181	-4.41136	1.12508	5.15061	18.5413	16.4931	18.582					sgCont vs. sgLDHAB	7.904	-20,80 to 36,61	No	ns	0.9981
89.1592		72.7235		5.44904		0		10.0893		26.7481						sgLDHA vs. sgLDHB	-10.49	-40,32 to 19,34	No	ns	0.9853
83.114				2.61069				15.7895								sgLDHA vs. sgLDHAB	-0.2424	-31,69 to 31,21	No	ns	> 0,9999
																sgLDHB vs. sgLDHAB	10.25	-19,59 to 40,08	No	ns	0.9877
																Atpenine A5
																sgCont vs. sgLDHA	-9.199	-37,91 to 19,51	No	ns	0.993
																sgCont vs. sgLDHB	3.851	-23,08 to 30,78	No	ns	> 0,9999
																sgCont vs. sgLDHAB	1.933	-26,77 to 30,64	No	ns	> 0,9999
																sgLDHA vs. sgLDHB	13.05	-16,78 to 42,88	No	ns	0.9309
																sgLDHA vs. sgLDHAB	11.13	-20,32 to 42,58	No	ns	0.9845
																sgLDHB vs. sgLDHAB	-1.918	-31,75 to 27,92	No	ns	> 0,9999
																Antimycine A
																sgCont vs. sgLDHA	-8.618	-37,33 to 20,09	No	ns	0.9959
																sgCont vs. sgLDHB	-6.866	-33,80 to 20,06	No	ns	0.999
																sgCont vs. sgLDHAB	-18.63	-47,34 to 10,08	No	ns	0.5341
																sgLDHA vs. sgLDHB	1.752	-28,08 to 31,59	No	ns	> 0,9999
																sgLDHA vs. sgLDHAB	-10.01	-41,46 to 21,43	No	ns	0.9933
																sgLDHB vs. sgLDHAB	-11.76	-41,60 to 18,07	No	ns	0.9656

## Sheet: Fig5e
Survival curves
	sgCont			sgLDHAB				sgCont vehicle vs. sgCont phenformin	Log-rank (Mantel-Cox) test			Gehan-Breslow-Wilcoxon test			Hazard Ratio (logrank)
Days elapsed	Vehicle	Phenformin	Irradiation	Vehicle	Phenformin	Irradiation			Chi square	5.466		Chi square	4.892		Ratio (and its reciprocal)	2.746	0.3642
69	1								df	1		df	1		95% CI of ratio	1,730 to 22,21	0,04503 to 0,5779
70	1								P value	0.0194		P value	0.027
70	1								P value summary	*		P value summary	*
70		1							Are the survival curves sig different?	Yes		Are the survival curves sig different?	Yes
71	1
71		1						sgCont vehicle vs. sgCont irradiation	Log-rank (Mantel-Cox) test			Gehan-Breslow-Wilcoxon test			Hazard Ratio (logrank)
73	1								Chi square	13.92		Chi square	11.95		Ratio (and its reciprocal)	4.88	0.2049
73				1					df	1		df	1		95% CI of ratio	6,728 to 142,0	0,007040 to 0,1486
74				1					P value	0.0002		P value	0.0005
74					1				P value summary	***		P value summary	***
76	1								Are the survival curves sig different?	Yes		Are the survival curves sig different?	Yes
76		1
76		1						sgCont vehicle vs. sgLDHAB vehicle	Log-rank (Mantel-Cox) test			Gehan-Breslow-Wilcoxon test			Hazard Ratio (logrank)
76		1							Chi square	9.375		Chi square	9.246		Ratio (and its reciprocal)	3.853	0.2596
76				1					df	1		df	1		95% CI of ratio	3,012 to 51,39	0,01946 to 0,3320
76					1				P value	0.0022		P value	0.0024
76					1				P value summary	**		P value summary	**
78		1							Are the survival curves sig different?	Yes		Are the survival curves sig different?	Yes
78				1
80				1
80				1				sgCont vehicle vs. sgLDHAB phenformin	Log-rank (Mantel-Cox) test			Gehan-Breslow-Wilcoxon test			Hazard Ratio (logrank)
81		1							Chi square	10.78		Chi square	10.5		Ratio (and its reciprocal)	4.119	0.2428
82					1				df	1		df	1		95% CI of ratio	3,872 to 70,51	0,01418 to 0,2583
82					1				P value	0.001		P value	0.0012
83					1				P value summary	**		P value summary	**
83					1				Are the survival curves sig different?	Yes		Are the survival curves sig different?	Yes
85		1
86				1				sgCont vehicle vs. sgLDHAB irradiation	Log-rank (Mantel-Cox) test			Gehan-Breslow-Wilcoxon test			Hazard Ratio (logrank)
86				1					Chi square	15.67		Chi square	13.61		Ratio (and its reciprocal)	6.919	0.1445
87					1				df	1		df	1		95% CI of ratio	8,116 to 207,1	0,004828 to 0,1232
92			1						P value	< 0,0001		P value	0.0002
108						1			P value summary	****		P value summary	***
139			1						Are the survival curves sig different?	Yes		Are the survival curves sig different?	Yes
148			1
149						1		sgCont phenformin vs. sgCont irradiation	Log-rank (Mantel-Cox) test			Gehan-Breslow-Wilcoxon test			Hazard Ratio (logrank)
161			1						Chi square	15.1		Chi square	12.44		Ratio (and its reciprocal)	4.45	0.2247
171			1						df	1		df	1		95% CI of ratio	6,083 to 74,86	0,01336 to 0,1644
171						1			P value	0.0001		P value	0.0004
181			1						P value summary	***		P value summary	***
184			1						Are the survival curves sig different?	Yes		Are the survival curves sig different?	Yes
220						1
> 220						1		sgCont phenformin vs. sgLDHAB vehicle	Log-rank (Mantel-Cox) test			Gehan-Breslow-Wilcoxon test			Hazard Ratio (logrank)
> 220						1			Chi square	1.215		Chi square	0.9019		Ratio (and its reciprocal)	1.62	0.6173
> 220						1			df	1		df	1		95% CI of ratio	0,6930 to 5,210	0,1919 to 1,443
> 220						1			P value	0.2703		P value	0.3423
									P value summary	ns		P value summary	ns
	sgCont			sgLDHAB					Are the survival curves sig different?	No		Are the survival curves sig different?	No
	Vehicle	Phenformin	Irradiation	Vehicle	Phenformin	Irradiation
Number of rows	45	45	45	45	45	45		sgCont phenformin vs. sgLDHAB phenformin	Log-rank (Mantel-Cox) test			Gehan-Breslow-Wilcoxon test			Hazard Ratio (logrank)
# of blank lines	39	37	38	37	37	37			Chi square	1.941		Chi square	1.954		Ratio (and its reciprocal)	1.809	0.5529
# rows with impossible data	0	0	0	0	0	0			df	1		df	1		95% CI of ratio	0,8348 to 6,463	0,1547 to 1,198
# censored subjects	0	0	0	0	0	4			P value	0.1636		P value	0.1622
# deaths/events	6	8	7	8	8	4			P value summary	ns		P value summary	ns
									Are the survival curves sig different?	No		Are the survival curves sig different?	No
Median survival	70.5	76	161	82	79	220
								sgCont phenformin vs. sgLDHAB irradiation	Log-rank (Mantel-Cox) test			Gehan-Breslow-Wilcoxon test			Hazard Ratio (logrank)
									Chi square	16.9		Chi square	14.13		Ratio (and its reciprocal)	6.462	0.1548
									df	1		df	1		95% CI of ratio	6,967 to 99,97	0,01000 to 0,1435
									P value	< 0,0001		P value	0.0002
									P value summary	****		P value summary	***
									Are the survival curves sig different?	Yes		Are the survival curves sig different?	Yes
								sgCont irradiation vs. sgLDHAB vehicle	Log-rank (Mantel-Cox) test			Gehan-Breslow-Wilcoxon test			Hazard Ratio (logrank)
									Chi square	14.14		Chi square	12.21		Ratio (and its reciprocal)	4.417	0.2264
									df	1		df	1		95% CI of ratio	5,073 to 62,09	0,01611 to 0,1971
									P value	0.0002		P value	0.0005
									P value summary	***		P value summary	***
									Are the survival curves sig different?	Yes		Are the survival curves sig different?	Yes
								sgCont irradiation vs. sgLDHAB phenformin	Log-rank (Mantel-Cox) test			Gehan-Breslow-Wilcoxon test			Hazard Ratio (logrank)
									Chi square	14.73		Chi square	12.33		Ratio (and its reciprocal)	4.402	0.2272
									df	1		df	1		95% CI of ratio	5,760 to 70,32	0,01422 to 0,1736
									P value	0.0001		P value	0.0004
									P value summary	***		P value summary	***
									Are the survival curves sig different?	Yes		Are the survival curves sig different?	Yes
								sgCont irradiation vs. sgLDHAB irradiation	Log-rank (Mantel-Cox) test			Gehan-Breslow-Wilcoxon test			Hazard Ratio (logrank)
									Chi square	5.109		Chi square	3.438		Ratio (and its reciprocal)	3.515	0.2845
									df	1		df	1		95% CI of ratio	1,314 to 16,16	0,06189 to 0,7609
									P value	0.0238		P value	0.0637
									P value summary	*		P value summary	ns
									Are the survival curves sig different?	Yes		Are the survival curves sig different?	No
								sgLDHAB vehicle vs. sgLDHAB phenformin	Log-rank (Mantel-Cox) test			Gehan-Breslow-Wilcoxon test			Hazard Ratio (logrank)
									Chi square	0.4032		Chi square	0.4686		Ratio (and its reciprocal)	1.315	0.7605
									df	1		df	1		95% CI of ratio	0,5386 to 3,895	0,2567 to 1,857
									P value	0.5254		P value	0.4936
									P value summary	ns		P value summary	ns
									Are the survival curves sig different?	No		Are the survival curves sig different?	No
								sgLDHAB vehicle vs. sgLDHAB irradiation	Log-rank (Mantel-Cox) test			Gehan-Breslow-Wilcoxon test			Hazard Ratio (logrank)
									Chi square	15.91		Chi square	13.9		Ratio (and its reciprocal)	6.431	0.1555
									df	1		df	1		95% CI of ratio	5,799 to 82,93	0,01206 to 0,1724
									P value	< 0,0001		P value	0.0002
									P value summary	****		P value summary	***
									Are the survival curves sig different?	Yes		Are the survival curves sig different?	Yes
								sgLDHAB phenformin vs. sgLDHAB irradiation	Log-rank (Mantel-Cox) test			Gehan-Breslow-Wilcoxon test			Hazard Ratio (logrank)
									Chi square	16.5		Chi square	14		Ratio (and its reciprocal)	6.394	0.1564
									df	1		df	1		95% CI of ratio	6,560 to 93,44	0,01070 to 0,1524
									P value	< 0,0001		P value	0.0002
									P value summary	****		P value summary	***
									Are the survival curves sig different?	Yes		Are the survival curves sig different?	Yes
