# Supplementary material for: Specific expression of lactate dehydrogenases in glioblastoma controls intercellular lactate transfer to promote tumor growth and invasion
Source: Research Square preprint supplement (doi:10.21203/rs.3.rs-690811/v1), 2021-07-09
Supplement: Supplementary file 13 [file 6aada943e66b3625e0b3da68.xlsx]

## Sheet: SuppFig4b
LDHs activity in CRISPR P3 cell lines (mOD/min @ 450nm)
sgCont	sgLDHA	sgLDHB	sgLDHA/B		Brown-Forsythe test			ANOVA summary			Dunnett's multiple comparisons test	Mean Diff,	95% CI of diff,	Significant?	Summary	Adjusted P Value
79.3575	30.254	56.2408	15.6644		F (DFn, DFd)	0,6119 (3, 8)		F	93.57
85.3515	26.7883	73.7514	5.31471		P value	0.6261		P value	< 0,0001		sgCont vs. sgLDHA	51.69	37,90 to 65,48	Yes	****	< 0,0001
83.8642	36.4642	64.9729	9.44603		P value summary	ns		P value summary	****		sgCont vs. sgLDHB	17.87	4,080 to 31,66	Yes	*	0.0146
					Significantly different standard deviations? (P < 0.05)	No		Are differences among means statistically significant? (P < 0.05)	Yes		sgCont vs. sgLDHA/B	72.72	58,93 to 86,51	Yes	****	< 0,0001
								R square	0.9723

## Sheet: SuppFig4c
LDHB activity in CRISPR P3 cell lines (mOD/min @ 450nm)
sgCont	sgLDHA	sgLDHB	sgLDHA/B		Brown-Forsythe test			ANOVA summary			Dunnett's multiple comparisons test	Mean Diff,	95% CI of diff,	Significant?	Summary	Adjusted P Value
94.5466	80.9395	1.06936	1.22492		F (DFn, DFd)	1,210 (3, 8)		F	682.3
106.211	80.6403	1.2893	1.43596		P value	0.3668		P value	< 0,0001		sgCont vs. sgLDHA	21.78	13,52 to 30,04	Yes	***	0.0002
107.158	80.9971	1.2005	1.36709		P value summary	ns		P value summary	****		sgCont vs. sgLDHB	101.5	93,19 to 109,7	Yes	****	< 0,0001
					Significantly different standard deviations? (P < 0.05)	No		Are differences among means statistically significant? (P < 0.05)	Yes		sgCont vs. sgLDHA/B	101.3	93,03 to 109,6	Yes	****	< 0,0001
								R square	0.9961

## Sheet: SuppFig4e
Annexin-V in CRISPR P3 cell lines
sgCont		sgLDHA		sgLDHB		sgLDHA/B			Two-way ANOVA	Ordinary		Tukey's multiple comparisons test	Mean Diff,	95% CI of diff,	Significant?	Summary	Adjusted P Value
21% O2	0.1% O2	21% O2	0.1% O2	21% O2	0.1% O2	21% O2	0.1% O2		Alpha	0.05
12.8	11.4	9.6	11.1	24.3	12.8	23.3	36.4					21% O2:sgCont vs. 21% O2:sgLDHA	1.367	-6,626 to 9,359	No	ns	0.9985
11.5	14.7	10.8	11.4	19.2	17.7	20.8	46.9					21% O2:sgCont vs. 21% O2:sgLDHB	-7.567	-15,56 to 0,4257	No	ns	0.0704
14.8	14	14.6	11.4	18.3	14.6	23.9	38					21% O2:sgCont vs. 21% O2:sgLDHA/B	-9.633	-17,63 to -1,641	Yes	*	0.0128
												21% O2:sgCont vs. 0.1% O2:sgCont	-0.3333	-8,326 to 7,659	No	ns	> 0,9999
												21% O2:sgCont vs. 0.1% O2:sgLDHA	1.733	-6,259 to 9,726	No	ns	0.9936
												21% O2:sgCont vs. 0.1% O2:sgLDHB	-2	-9,992 to 5,992	No	ns	0.9853
												21% O2:sgCont vs. 0.1% O2:sgLDHA/B	-27.4	-35,39 to -19,41	Yes	****	< 0,0001
												21% O2:sgLDHA vs. 21% O2:sgLDHB	-8.933	-16,93 to -0,9410	Yes	*	0.023
												21% O2:sgLDHA vs. 21% O2:sgLDHA/B	-11	-18,99 to -3,008	Yes	**	0.004
												21% O2:sgLDHA vs. 0.1% O2:sgCont	-1.7	-9,692 to 6,292	No	ns	0.9943
												21% O2:sgLDHA vs. 0.1% O2:sgLDHA	0.3667	-7,626 to 8,359	No	ns	> 0,9999
												21% O2:sgLDHA vs. 0.1% O2:sgLDHB	-3.367	-11,36 to 4,626	No	ns	0.8175
												21% O2:sgLDHA vs. 0.1% O2:sgLDHA/B	-28.77	-36,76 to -20,77	Yes	****	< 0,0001
												21% O2:sgLDHB vs. 21% O2:sgLDHA/B	-2.067	-10,06 to 5,926	No	ns	0.9823
												21% O2:sgLDHB vs. 0.1% O2:sgCont	7.233	-0,7590 to 15,23	No	ns	0.0914
												21% O2:sgLDHB vs. 0.1% O2:sgLDHA	9.3	1,308 to 17,29	Yes	*	0.0169
												21% O2:sgLDHB vs. 0.1% O2:sgLDHB	5.567	-2,426 to 13,56	No	ns	0.2991
												21% O2:sgLDHB vs. 0.1% O2:sgLDHA/B	-19.83	-27,83 to -11,84	Yes	****	< 0,0001
												21% O2:sgLDHA/B vs. 0.1% O2:sgCont	9.3	1,308 to 17,29	Yes	*	0.0169
												21% O2:sgLDHA/B vs. 0.1% O2:sgLDHA	11.37	3,374 to 19,36	Yes	**	0.003
												21% O2:sgLDHA/B vs. 0.1% O2:sgLDHB	7.633	-0,3590 to 15,63	No	ns	0.0667
												21% O2:sgLDHA/B vs. 0.1% O2:sgLDHA/B	-17.77	-25,76 to -9,774	Yes	****	< 0,0001
												0.1% O2:sgCont vs. 0.1% O2:sgLDHA	2.067	-5,926 to 10,06	No	ns	0.9823
												0.1% O2:sgCont vs. 0.1% O2:sgLDHB	-1.667	-9,659 to 6,326	No	ns	0.9949
												0.1% O2:sgCont vs. 0.1% O2:sgLDHA/B	-27.07	-35,06 to -19,07	Yes	****	< 0,0001
												0.1% O2:sgLDHA vs. 0.1% O2:sgLDHB	-3.733	-11,73 to 4,259	No	ns	0.7346
												0.1% O2:sgLDHA vs. 0.1% O2:sgLDHA/B	-29.13	-37,13 to -21,14	Yes	****	< 0,0001
												0.1% O2:sgLDHB vs. 0.1% O2:sgLDHA/B	-25.4	-33,39 to -17,41	Yes	****	< 0,0001

## Sheet: SuppFig4f
										Spheroid invasion of CRISPR BL13 cell lines
										LDHA
										21% O2		0.1% O2			Two-way ANOVA	Ordinary		Tukey's multiple comparisons test	Mean Diff,	95% CI of diff,	Significant?	Summary	Adjusted P Value
										sgCont	sgLDHA	sgCont	sgLDHA		Alpha	0.05
										1.224	1.099	0.796	0.829					21% O2:sgCont vs. 21% O2:sgLDHA	0.1353	0,06487 to 0,2056	Yes	****	< 0,0001
										0.842	0.92	0.683	0.756					21% O2:sgCont vs. 0.1% O2:sgCont	0.04525	-0,02513 to 0,1156	No	ns	0.3415
										0.948	0.76	1.11	0.752					21% O2:sgCont vs. 0.1% O2:sgLDHA	0.1551	0,08414 to 0,2260	Yes	****	< 0,0001
										1.006	0.908	0.757	0.817					21% O2:sgLDHA vs. 0.1% O2:sgCont	-0.09	-0,1604 to -0,01962	Yes	**	0.0062
										0.854	0.686	0.89	0.761					21% O2:sgLDHA vs. 0.1% O2:sgLDHA	0.01983	-0,05111 to 0,09078	No	ns	0.8857
										0.938	0.932	0.779	0.642					0.1% O2:sgCont vs. 0.1% O2:sgLDHA	0.1098	0,03889 to 0,1808	Yes	***	0.0006
										1.035	0.859	0.911	0.841
										1.154	0.939	0.941	0.731
										0.992	1.006	0.965	1.009
										0.929	0.929	0.833	0.968
										1.054	1.004	0.569	0.984
										1.038	0.931	0.879	0.935
										1.025	0.964	0.843	0.9
										0.913	1.147	1.04	0.935
										1.016	0.943	1.097	0.959
										1.034	1.088	1.162	0.89
										0.979	0.891	0.898	0.907
										1.047	1.057	0.982	0.895
										0.996	1.002	0.893	0.906
										1.09	1.023	0.869	0.966
										0.982	0.969	0.792	0.967
										1.054	0.995	0.801	0.905
										0.94	1.122	0.749	0.955
										0.912	1.129	0.846	0.828
										0.91	0.904	0.783	0.772
										0.973	0.823	0.843	0.779
										1.062	0.798	0.852	0.789
										0.932	0.86	0.839	0.564
										1.046	0.819	0.786	0.828
										1.048	0.895	0.707	0.796
										1.015	0.906	0.833	0.67
										1.014	0.828	0.989
										LDHB
										21% O2		0.1% O2			Two-way ANOVA	Ordinary		Tukey's multiple comparisons test	Mean Diff,	95% CI of diff,	Significant?	Summary	Adjusted P Value
										sgCont	sgLDHB	sgCont	sgLDHB		Alpha	0.05
										1.224	1.099	1.013	0.897					21% O2:sgCont vs. 21% O2:sgLDHB	-0.08132	-0,1555 to -0,007121	Yes	*	0.0257
										0.842	0.92	1.191	0.836					21% O2:sgCont vs. 0.1% O2:sgCont	0.05831	-0,01530 to 0,1319	No	ns	0.1711
										0.948	0.76	0.979	0.885					21% O2:sgCont vs. 0.1% O2:sgLDHB	0.008	-0,06561 to 0,08161	No	ns	0.9921
										1.006	0.908	0.826	0.902					21% O2:sgLDHB vs. 0.1% O2:sgCont	0.1396	0,06543 to 0,2138	Yes	****	< 0,0001
										0.854	0.686	1.062	0.823					21% O2:sgLDHB vs. 0.1% O2:sgLDHB	0.08932	0,01512 to 0,1635	Yes	*	0.0114
										0.938	0.932	0.866	0.86					0.1% O2:sgCont vs. 0.1% O2:sgLDHB	-0.05031	-0,1239 to 0,02330	No	ns	0.2878
										1.035	0.859	0.984	0.905
										1.154	0.939	0.922	0.799
										0.992	1.006	1.265	1.211
										0.929	0.929	1.183	1.1
										1.054	1.004	1.288	1.113
										1.038	0.931	1.265	1.145
										1.025	0.964	1.225	1.094
										0.913	1.147	1.228	1.165
										1.016	0.943	1.145	1.24
										1.034	1.088	0.99	1.147
										0.979	0.891	0.915	1.043
										1.047	1.057	1.005	0.986
										0.996	1.002	0.983	0.82
										1.09	1.023	0.908	1.171
										0.982	0.969	1.077	1.067
										1.054	0.995	1.232	1.012
										0.94	1.122	1.082	0.93
										0.912	1.129	1.046	0.99
										0.91	0.904	1.077	1.006
										0.973	0.823	1.196	0.936
										1.062	0.798	1.028	0.883
										0.932	0.86	1.051	0.872
										1.046	0.819	1.176	1.098
										1.048	0.895	1.048	0.906
										1.015	0.906	1.267	0.925
										1.014	0.828		0.979
										LDHAB
										21% O2		0.1% O2			Two-way ANOVA	Ordinary		Tukey's multiple comparisons test	Mean Diff,	95% CI of diff,	Significant?	Summary	Adjusted P Value
										sgCont	sgLDHAB	sgCont	sgLDHAB		Alpha	0.05
										0.979	0.953	0.734	0.551					21% O2:sgCont vs. 21% O2:LDHAB	0.2633	0,1634 to 0,3631	Yes	****	< 0,0001
										1.047	1.16	0.605	0.518					21% O2:sgCont vs. 0.1% O2:sgCont	0.03129	-0,06858 to 0,1312	No	ns	0.8449
										0.996	1.065	0.579	0.442					21% O2:sgCont vs. 0.1% O2:LDHAB	0.5331	0,4332 to 0,6330	Yes	****	< 0,0001
										1.09	1.113	0.396	0.345					21% O2:LDHAB vs. 0.1% O2:sgCont	-0.232	-0,3318 to -0,1321	Yes	****	< 0,0001
										0.982	1.082	0.653	0.49					21% O2:LDHAB vs. 0.1% O2:LDHAB	0.2698	0,1700 to 0,3697	Yes	****	< 0,0001
										1.054	1.087	0.626	0.49					0.1% O2:sgCont vs. 0.1% O2:LDHAB	0.5018	0,4019 to 0,6017	Yes	****	< 0,0001
										0.94	1.192	0.637	0.474
										0.912	1.214	0.708	0.376
										0.91	0.904	0.838	0.76
										0.973	0.823	0.847	0.73
										1.062	0.798	0.891	0.508
										0.932	0.86	0.881	0.71
										1.046	0.819	0.892	0.37
										1.048	0.895	0.863	0.57
										1.015	0.906	1.101	0.542
										1.014	0.828	1.093	0.652
										0.904	0.879	0.768	0.379
										1.061	0.92	0.587	0.473
										0.898	0.932	0.738	0.412
										1.048	0.925	0.65	0.144
										0.981	0.957	0.73	0.404
										0.978	0.966	0.581	0.398
										1.125	0.923	0.666	0.27
										1.005	1.048	0.618	0.198

## Sheet: SuppFig4g
ELISA VEFG
sgCont	sgLDHA	sgLDHB	sgLDHA/B		Brown-Forsythe test			ANOVA summary			Dunnett's multiple comparisons test	Mean Diff,	95% CI of diff,	Significant?	Summary	Adjusted P Value
1.93524	0.953685	8.55879	2.99372		F (DFn, DFd)	0,6017 (3, 8)		F	10.82
1.01643	0.499549	4.91807	3.14453		P value	0.6319		P value	0.0034		sgCont vs. sgLDHA	0.5569	-2,421 to 3,535	No	ns	0.9069
0.671878	0.499549	4.54782	1.33473		P value summary	ns		P value summary	**		sgCont vs. sgLDHB	-4.8	-7,778 to -1,822	Yes	**	0.0043
					Significantly different standard deviations? (P < 0.05)	No		Are differences among means statistically significant? (P < 0.05)	Yes		sgCont vs. sgLDHA/B	-1.283	-4,261 to 1,695	No	ns	0.498
								R square	0.8023

## Sheet: SuppFig4h
P3 survival curves with bevacizumab
See also Fig3i
Days elapsed	sgCont	sgLDHA	sgLDHB	sgLDHA/B		sgCont vs sgCont + bevacizumab		Log-rank (Mantel-Cox) test			Gehan-Breslow-Wilcoxon test			Hazard Ratio (logrank)
53			1					Chi square	7.163		Chi square	5.345		Ratio (and its reciprocal)	3.073	0.3254
67			1					df	1		df	1		95% CI of ratio	2,804 to 38,87	0,02573 to 0,3566
70			1					P value	0.0074		P value	0.0208
70			1					P value summary	**		P value summary	*
71			1					Are the survival curves sig different?	Yes		Are the survival curves sig different?	Yes
72			1
72			2			sgLDHA vs sgLDHA + bevacizumab		Log-rank (Mantel-Cox) test			Gehan-Breslow-Wilcoxon test			Hazard Ratio (logrank)
74	1							Chi square	0.1551		Chi square	0.1786		Ratio (and its reciprocal)	1.185	0.844
79	1							df	1		df	1		95% CI of ratio	0,4360 to 4,226	0,2367 to 2,294
79	1							P value	0.6938		P value	0.6726
79	1							P value summary	ns		P value summary	ns
79		1						Are the survival curves sig different?	No		Are the survival curves sig different?	No
79		1
79		1				sgLDHB vs sgLDHB + bevacizumab		Log-rank (Mantel-Cox) test			Gehan-Breslow-Wilcoxon test			Hazard Ratio (logrank)
79		1						Chi square	10.7		Chi square	9.495		Ratio (and its reciprocal)	4.922	0.2032
79		1						df	1		df	1		95% CI of ratio	6,677 to 305,9	0,003270 to 0,1498
82	1							P value	0.0011		P value	0.0021
83	1							P value summary	**		P value summary	**
85	2							Are the survival curves sig different?	Yes		Are the survival curves sig different?	Yes
90
90						sgLDHA/B vs sgLDHA/B + bevacizumab		Log-rank (Mantel-Cox) test			Gehan-Breslow-Wilcoxon test			Hazard Ratio (logrank)
90		1						Chi square	12.09		Chi square	10.29		Ratio (and its reciprocal)	4.767	0.2098
97		2						df	1		df	1		95% CI of ratio	4,910 to 97,54	0,01025 to 0,2037
108				1				P value	0.0005		P value	0.0013
108				1				P value summary	***		P value summary	**
110				1				Are the survival curves sig different?	Yes		Are the survival curves sig different?	Yes
110				1
111				1
113				1
114				2

## Sheet: SuppFig4i
BL13 survival curves with bevacizumab
Days elapsed	sgCont	sgLDHA/B		Log-rank (Mantel-Cox) test			Gehan-Breslow-Wilcoxon test			Hazard Ratio (Mantel-Haenszel)
82	1			Chi square	5.451		Chi square	6.282		Ratio (and its reciprocal)	3.627	0.2757
82	1			df	1		df	1		95% CI of ratio	1,230 to 10,70	0,09347 to 0,8132
88	1			P value	0.0196		P value	0.0122
91	1			P value summary	*		P value summary	*
94	1			Are the survival curves sig different?	Yes		Are the survival curves sig different?	Yes
94	1
94	1
95		1
98		1
101		1
101		1
103		1
103		1
104	1
106	1
106	1
114		1
114		1
117		1
117		1
