# Supplementary material for: Specific expression of lactate dehydrogenases in glioblastoma controls intercellular lactate transfer to promote tumor growth and invasion
Source: Research Square preprint supplement (doi:10.21203/rs.3.rs-690811/v1), 2021-07-09
Supplement: Supplementary file 14 [file 6c2fff4dd9f41f6e9440bc42.xlsx]

## Sheet: Fig3b
Lactate secretion in CRISPR P3 cell lines (Relative Light Unit)
sgCont		sgLDHA		sgLDHB		sgLDHA/B			Two-way ANOVA	Ordinary		Tukey's multiple comparisons test	Mean Diff,	95% CI of diff,	Significant?	Summary	Adjusted P Value
21% O2	1% O2	21% O2	1% O2	21% O2	1% O2	21% O2	1% O2		Alpha	0.05
1116144	1555588	891648	1638704	1432412	1842194	33681	45942					21%:sCont vs. 21%:sgLDHA	282181	34590 to 529772	Yes	*	0.0177
1119478	1585371	799233	1842963	1312883	1784589	36531	39447					21%:sCont vs. 21%:sgLDHB	-278936	-526527 to -31345	Yes	*	0.0196
1124159	1332594	782626	1396636	1408518	1667328	35859	35421					21%:sCont vs. 21%:sgLDHA/B	1083000	835596 to 1,331e+006	Yes	****	< 0,0001
1109217	1407000	866766	1314855	1430930	1608404	30178	35113					21%:sCont vs. 1%:sCont	-352889	-600480 to -105298	Yes	**	0.0018
												21%:sCont vs. 1%:sgLDHA	-431040	-678631 to -183449	Yes	***	0.0001
												21%:sCont vs. 1%:sgLDHB	-608379	-855970 to -360788	Yes	****	< 0,0001
												21%:sCont vs. 1%:sgLDHA/B	1078000	830678 to 1,326e+006	Yes	****	< 0,0001
												21%:sgLDHA vs. 21%:sgLDHB	-561118	-808708 to -313527	Yes	****	< 0,0001
												21%:sgLDHA vs. 21%:sgLDHA/B	801006	553415 to 1,049e+006	Yes	****	< 0,0001
												21%:sgLDHA vs. 1%:sCont	-635070	-882661 to -387479	Yes	****	< 0,0001
												21%:sgLDHA vs. 1%:sgLDHA	-713221	-960812 to -465630	Yes	****	< 0,0001
												21%:sgLDHA vs. 1%:sgLDHB	-890561	-1,138e+006 to -642970	Yes	****	< 0,0001
												21%:sgLDHA vs. 1%:sgLDHA/B	796088	548497 to 1,044e+006	Yes	****	< 0,0001
												21%:sgLDHB vs. 21%:sgLDHA/B	1362000	1,115e+006 to 1,610e+006	Yes	****	< 0,0001
												21%:sgLDHB vs. 1%:sCont	-73953	-321543 to 173638	No	ns	0.9717
												21%:sgLDHB vs. 1%:sgLDHA	-152104	-399695 to 95487	No	ns	0.4812
												21%:sgLDHB vs. 1%:sgLDHB	-329443	-577034 to -81852	Yes	**	0.004
												21%:sgLDHB vs. 1%:sgLDHA/B	1357000	1,110e+006 to 1,605e+006	Yes	****	< 0,0001
												21%:sgLDHA/B vs. 1%:sCont	-1436000	-1,684e+006 to -1,188e+006	Yes	****	< 0,0001
												21%:sgLDHA/B vs. 1%:sgLDHA	-1514000	-1,762e+006 to -1,267e+006	Yes	****	< 0,0001
												21%:sgLDHA/B vs. 1%:sgLDHB	-1692000	-1,939e+006 to -1,444e+006	Yes	****	< 0,0001
												21%:sgLDHA/B vs. 1%:sgLDHA/B	-4919	-252509 to 242672	No	ns	> 0,9999
												1%:sCont vs. 1%:sgLDHA	-78151	-325742 to 169440	No	ns	0.962
												1%:sCont vs. 1%:sgLDHB	-255491	-503081 to -7900	Yes	*	0.0397
												1%:sCont vs. 1%:sgLDHA/B	1431000	1,184e+006 to 1,679e+006	Yes	****	< 0,0001
												1%:sgLDHA vs. 1%:sgLDHB	-177339	-424930 to 70252	No	ns	0.2984
												1%:sgLDHA vs. 1%:sgLDHA/B	1509000	1,262e+006 to 1,757e+006	Yes	****	< 0,0001
												1%:sgLDHB vs. 1%:sgLDHA/B	1687000	1,439e+006 to 1,934e+006	Yes	****	< 0,0001

## Sheet: Fig3c
Single CRISPR P3 cell intracellular lactate measurements
Lactate (FmTFP/Fvenus)
	sgCont		sgLDHA		sgLDHB		sgLDHA/B
Time (min)	Mean	SEM	Mean	SEM	Mean	SEM	Mean	SEM
0.17	1.15587	0.00786872	1.17436	0.0105834	1.13976	0.0086886	1.04846	0.0101965
0.33	1.15482	0.00808476	1.17247	0.0105122	1.13549	0.00856039	1.04523	0.0102013
0.5	1.15399	0.00816128	1.1716	0.0105914	1.1327	0.00842754	1.04269	0.0102992
0.67	1.1534	0.00810987	1.17141	0.010694	1.13168	0.0083482	1.0415	0.0103035
0.83	1.15335	0.00801006	1.17083	0.0106074	1.13121	0.00825752	1.03851	0.0108873
1	1.15264	0.00797456	1.17016	0.0106061	1.13062	0.0082834	1.03765	0.010769
1.17	1.15257	0.00796527	1.16985	0.0105531	1.12974	0.00826102	1.03745	0.010651
1.33	1.15263	0.00793888	1.1696	0.0107018	1.12889	0.00823471	1.04058	0.0102006
1.5	1.15313	0.00797146	1.16851	0.0106345	1.12914	0.00819357	1.04005	0.010029
1.67	1.15302	0.00779731	1.16763	0.0106749	1.12858	0.00815622	1.03856	0.00984379
1.83	1.15282	0.00780081	1.16736	0.0105885	1.12864	0.00807264	1.03742	0.00969406
2	1.15236	0.00773599	1.16866	0.010665	1.1276	0.00802805	1.03779	0.00973218
2.17	1.15207	0.00793027	1.1684	0.0108073	1.12858	0.00796442	1.03889	0.00986963
2.33	1.15226	0.00803672	1.16858	0.0109893	1.12874	0.00792157	1.03885	0.0098723
2.5	1.15254	0.00807149	1.16871	0.0110846	1.12937	0.0078363	1.03971	0.00992518
2.67	1.15204	0.0079759	1.16938	0.0111302	1.12845	0.00782138	1.03909	0.00975371
2.83	1.1505	0.00782567	1.16944	0.0110743	1.12793	0.00787083	1.0389	0.00966234
3	1.15025	0.0077097	1.16897	0.0108948	1.12812	0.00791403	1.03994	0.00938501
3.17	1.15074	0.0077345	1.16914	0.0108722	1.12853	0.00791783	1.03965	0.00961217
3.33	1.15131	0.0077428	1.16822	0.0108141	1.12922	0.00790594	1.0387	0.00985278
3.5	1.15102	0.00771806	1.16813	0.0110329	1.1293	0.0078621	1.03811	0.010001
3.67	1.15081	0.00754222	1.16761	0.0109808	1.12933	0.00785772	1.03861	0.00966411
3.83	1.15137	0.00750093	1.16826	0.0111714	1.12937	0.00781078	1.03856	0.00937227
4	1.15088	0.00749529	1.1686	0.0112491	1.12947	0.00786228	1.03856	0.00919116
4.17	1.1516	0.00771902	1.16934	0.0114792	1.13014	0.00779678	1.03857	0.00915157
4.33	1.15104	0.00772034	1.17022	0.0117351	1.13047	0.00777903	1.03912	0.00904254
4.5	1.15199	0.00777976	1.16912	0.0116665	1.13063	0.00769868	1.0391	0.00899078
4.67	1.15054	0.00760858	1.16924	0.0116153	1.13035	0.00770892	1.03976	0.00884845
4.83	1.15068	0.0076442	1.16953	0.0113736	1.13033	0.00769479	1.04021	0.00880405
5	1.15076	0.00765396	1.17046	0.01153	1.13012	0.00766723	1.03941	0.00874016
5.17	1.15197	0.00772337	1.16999	0.011531	1.12992	0.00764433	1.03828	0.00894819
5.33	1.15152	0.00762656	1.16864	0.0115656	1.1295	0.00761947	1.03763	0.00892365
5.5	1.15161	0.00768973	1.16928	0.011721	1.12917	0.00759313	1.03705	0.00902522
5.67	1.15153	0.00765944	1.16878	0.0119186	1.12949	0.00760335	1.03777	0.0092657
5.83	1.15137	0.00774123	1.16742	0.0118663	1.12999	0.0075841	1.03684	0.00962468
6	1.15066	0.00764958	1.16626	0.0116888	1.12997	0.00755761	1.03647	0.00963128
6.17	1.15228	0.00788514	1.16636	0.0114563	1.12899	0.00751088	1.03512	0.00932252
6.33	1.15513	0.00796286	1.16776	0.0114819	1.12793	0.00749642	1.03612	0.00887928
6.5	1.15884	0.00805196	1.16864	0.0113894	1.12788	0.00752711	1.03881	0.00856661
6.67	1.16159	0.00807125	1.17073	0.0112453	1.13017	0.00753692	1.04195	0.0085968
6.83	1.16433	0.00823317	1.17359	0.0108649	1.13282	0.00754306	1.03881	0.0102159
7	1.16626	0.00848489	1.17691	0.010339	1.13427	0.00764865	1.03826	0.0104307
7.17	1.16649	0.00848487	1.17932	0.00997741	1.1327	0.00754545	1.03928	0.0102514
7.33	1.16525	0.0084903	1.18046	0.00971904	1.12968	0.00754196	1.04434	0.00837925
7.5	1.16416	0.00846784	1.17994	0.00961063	1.12671	0.00750261	1.04465	0.0080263
7.67	1.16397	0.00849794	1.17837	0.00952666	1.12362	0.00764282	1.04414	0.00769746
7.83	1.16327	0.00843064	1.17713	0.00957863	1.12028	0.00785255	1.04234	0.00728504
8	1.16294	0.00846979	1.1754	0.00963887	1.11706	0.00798767	1.04138	0.00699146
8.17	1.16231	0.00845237	1.17449	0.00971641	1.11444	0.00816191	1.04013	0.00681721
8.33	1.16071	0.00842555	1.17292	0.00971497	1.11204	0.00820212	1.03875	0.00678291
8.5	1.15979	0.00836637	1.17077	0.00985172	1.10981	0.0082658	1.03725	0.00661794
8.67	1.15825	0.0082724	1.16819	0.00980093	1.10845	0.00813794	1.03631	0.00657173
8.83	1.15959	0.00831271	1.1667	0.0097601	1.11004	0.00791448	1.03623	0.00661018
9	1.16058	0.00825959	1.16745	0.00958893	1.11373	0.00778187	1.03582	0.00710442
9.17	1.16232	0.00837395	1.16962	0.00958494	1.11845	0.00772407	1.03685	0.00703424
9.33	1.1637	0.00830034	1.17108	0.00953153	1.12221	0.00778594	1.03643	0.00725834
9.5	1.16398	0.00823646	1.17151	0.00953282	1.12434	0.00764251	1.0373	0.00700447
9.67	1.16423	0.00820997	1.17223	0.0095405	1.12635	0.00760556	1.03771	0.00734996
9.83	1.16398	0.00819959	1.17236	0.00945445	1.12745	0.00757723	1.03941	0.00749376
10	1.16289	0.00826285	1.1725	0.00936362	1.12911	0.00767728	1.04027	0.00772311
10.17	1.16171	0.00817622	1.17141	0.00935612	1.13048	0.00774842	1.03947	0.00785947
10.33	1.16126	0.0082013	1.17077	0.00947904	1.13243	0.00773092	1.0412	0.00769821
10.5	1.16025	0.00806321	1.17082	0.00963021	1.13335	0.00763278	1.04227	0.00790714
10.67	1.15905	0.00798088	1.17067	0.00961104	1.13367	0.00751164	1.04308	0.00785897
10.83	1.15895	0.00784707	1.17074	0.00943081	1.13202	0.00728997	1.04114	0.00809855
11	1.15854	0.00783971	1.16985	0.00915006	1.13062	0.00713381	1.04059	0.00791906
11.17	1.15857	0.00775557	1.16916	0.00905838	1.12941	0.00689588	1.04065	0.00785154
11.33	1.15694	0.00765334	1.16916	0.00919898	1.12883	0.00680677	1.04081	0.00788388
11.5	1.15776	0.00769168	1.16933	0.00930347	1.12911	0.00676228	1.04065	0.00796386
11.67	1.15769	0.00780081	1.16964	0.0093013	1.12922	0.00679952	1.04069	0.00805913
11.83	1.1575	0.00786421	1.16999	0.00932986	1.12944	0.00670046	1.04039	0.00817018
12	1.15734	0.00783115	1.17085	0.00953409	1.12902	0.00655589	1.04103	0.00833907
12.17	1.15762	0.00776141	1.16975	0.00940145	1.12857	0.00644847	1.05624	0.00808427
12.33	1.1577	0.00770197	1.1693	0.00948623	1.12792	0.00644286	1.05584	0.00808723
12.5	1.15792	0.00755766	1.16852	0.00942554	1.1271	0.00647046	1.0548	0.00802046
12.67	1.158	0.00758901	1.17221	0.009995	1.12641	0.00648882	1.05393	0.00808962
12.83	1.15879	0.00769084	1.17328	0.0101054	1.12719	0.00651992	1.05389	0.00815347
13	1.15872	0.00777927	1.17081	0.00960853	1.12708	0.00647732	1.05417	0.00813471
13.17	1.15942	0.00771259	1.16689	0.00903457	1.12747	0.00647086	1.04213	0.00819997
13.33	1.15934	0.00772183	1.16525	0.0091319	1.12713	0.00633844	1.04257	0.00822692
13.5	1.15878	0.00766333	1.16776	0.00918263	1.12794	0.00627366	1.04145	0.00828931
13.67	1.15872	0.00770523	1.16903	0.00934344	1.12821	0.00622455	1.0403	0.00823794
13.83	1.15871	0.00770271	1.16931	0.00929475	1.12848	0.00619936	1.03966	0.00823179
14	1.15909	0.00789665	1.16788	0.00913406	1.12828	0.0062332	1.04071	0.0081315
14.17	1.15764	0.00780744	1.1674	0.00909034	1.12736	0.00601452	1.04042	0.00805107
14.33	1.15846	0.00803756	1.16656	0.00911103	1.12688	0.00602462	1.04052	0.00791061
14.5	1.15763	0.00795854	1.16713	0.00914129	1.12669	0.00592075	1.0411	0.00782291
14.67	1.15705	0.00810002	1.16688	0.00920309	1.12677	0.00603438	1.04102	0.00779038
14.83	1.15377	0.00805283	1.16576	0.00922928	1.12573	0.00584621	1.04068	0.00778408
15	1.15117	0.00804991	1.16255	0.00918525	1.12428	0.00564845	1.03855	0.00764174
15.17	1.14819	0.0081735	1.15725	0.00886464	1.12281	0.00539723	1.03664	0.00746255
15.33	1.14515	0.00813272	1.15	0.00851008	1.12041	0.00520049	1.03811	0.00692546
15.5	1.14046	0.00826091	1.14222	0.00819614	1.11686	0.00503021	1.03657	0.00668077
15.67	1.13428	0.00813811	1.13454	0.007989	1.11247	0.00483881	1.03618	0.00640501
15.83	1.12697	0.00801548	1.12663	0.0077292	1.10807	0.00474447	1.03172	0.0060389
16	1.11828	0.00782305	1.11875	0.00742251	1.10322	0.00466741	1.03066	0.00565052
16.17	1.10778	0.0075043	1.10989	0.00699994	1.0988	0.00463303	1.02852	0.00513227
16.33	1.09572	0.00716302	1.10248	0.0067229	1.0942	0.00456038	1.02611	0.00471627
16.5	1.08371	0.00660996	1.09432	0.00634374	1.08966	0.00446887	1.02345	0.00435323
16.67	1.07321	0.00617173	1.08638	0.00603067	1.08436	0.00437713	1.0207	0.00454773
16.83	1.0636	0.00570734	1.07796	0.00556917	1.07899	0.00428218	1.01789	0.00404134
17	1.05597	0.00545756	1.07087	0.00520229	1.07495	0.004188	1.01603	0.00388483
17.17	1.04879	0.00503714	1.06431	0.00487248	1.07059	0.00416651	1.01477	0.0033357
17.33	1.04264	0.00485342	1.05803	0.00456178	1.06727	0.00404676	1.01604	0.00308272
17.5	1.03787	0.00466773	1.05278	0.0044005	1.0625	0.0040456	1.01473	0.00284103
17.67	1.0336	0.00452069	1.04785	0.00424311	1.05894	0.00400748	1.01364	0.0025294
17.83	1.02909	0.00412184	1.04408	0.00413799	1.05477	0.00414394	1.01141	0.00245877
18	1.02413	0.00367819	1.04023	0.00393927	1.05161	0.00407416	1.01052	0.0024026
18.17	1.02026	0.00332215	1.03614	0.00363023	1.04835	0.00405481	1.01019	0.00219585
18.33	1.01732	0.00306876	1.03286	0.00351688	1.04551	0.00395041	1.00946	0.00200236
18.5	1.01558	0.00288337	1.03034	0.0033722	1.04403	0.0036769	1.00935	0.00185856
18.67	1.01391	0.00263756	1.02907	0.00336558	1.04126	0.003524	1.00903	0.00173364
18.83	1.01355	0.00247621	1.02692	0.00320902	1.03864	0.00330589	1.00916	0.00169011
19	1.01221	0.00231949	1.02488	0.00314969	1.03502	0.00337379	1.00873	0.00151855
19.17	1.01231	0.00226354	1.02361	0.00305554	1.0329	0.00325249	1.00811	0.00149231
19.33	1.01143	0.0020546	1.02146	0.00284351	1.03088	0.00321648	1.00794	0.00160295
19.5	1.01163	0.00193584	1.01864	0.00272631	1.02854	0.00308711	1.00741	0.00163734
19.67	1.01028	0.00182789	1.01643	0.00267008	1.0266	0.00292816	1.00692	0.00154557
19.83	1.00924	0.00181411	1.01562	0.00267182	1.02499	0.00268887	1.00109	0.0036673
20	1.00788	0.00185867	1.01233	0.00281577	1.02396	0.00242066	1.00096	0.00361493
20.17	1.00731	0.00181678	1.01062	0.00316518	1.02254	0.00228322	1.00012	0.00353387
20.33	1.00712	0.00173663	1.00971	0.00310335	1.02062	0.00208108	1.00568	0.00106363
20.5	1.00724	0.00167578	1.01228	0.00279462	1.01867	0.00193306	1.00491	0.00099215
20.67	1.00669	0.00161985	1.01265	0.00242643	1.01634	0.00184097	1.00576	0.00097795
20.83	1.00546	0.00161725	1.0124	0.00243424	1.01402	0.00173862	1.00451	0.00099056
21	1.00406	0.00175301	1.01026	0.00229896	1.01193	0.00169175	1.00446	0.00094367
21.17	1.00255	0.00174322	1.0084	0.00228924	1.01116	0.00150729	1.00259	0.00086518
21.33	1.00127	0.0014535	1.00672	0.00226898	1.01062	0.00138013	1.00182	0.000863
21.5	1.0013	0.00119763	1.00648	0.00211198	1.00962	0.00127343	1.00153	0.00086716
21.67	1.0017	0.00106239	1.00551	0.00205716	1.00777	0.00124907	1.00153	0.00079023
21.83	1.00243	0.00095119	1.0048	0.00194247	1.00609	0.00116525	1.00124	0.00077824
22	1.00105	0.0009772	1.00448	0.00185416	1.00519	0.00102001	1.00063	0.00073679
22.17	1.00119	0.00082283	1.00425	0.0017673	1.00434	0.00082267	1.00077	0.00067322
22.33	1.00158	0.00075039	1.00391	0.00162871	1.00372	0.00072049	1.00059	0.00055989
22.5	1.00181	0.00066141	1.00308	0.0016681	1.00245	0.00056404	1.00079	0.00045909
22.67	1.00073	0.00062645	1.00324	0.00163548	1.00215	0.00051937	1.00013	0.00057689
22.83	0.999338	0.00041667	1.00286	0.00173127	1.00107	0.00031747	1.00105	0.00067142
23	0.999308	0.00036458	1.00345	0.00170442	1.00054	0.00043023	1.00021	0.00064613
23.17	0.999547	0.00036809	1.00312	0.00176987	0.998652	0.00044667	1.00022	0.00068586
23.33	1.00006	0.0004721	1.00276	0.00171924	0.997679	0.00043704	1.00003	0.00047718
23.5	0.999418	0.00062338	1.00148	0.00157807	0.996973	0.00046643	1.00004	0.00050724
23.67	0.999	0.00080329	1.00055	0.00148037	0.996295	0.0006657	0.999484	0.00057927
23.83	0.998603	0.00102936	1.00038	0.00154441	0.996064	0.00083862	0.998166	0.00057605
24	0.998357	0.00122277	1.00065	0.00163628	0.994874	0.00096023	0.997885	0.00058735
24.17	0.998125	0.00125081	1.00101	0.00157361	0.993924	0.00104822	0.998225	0.00058862
24.33	0.999459	0.00130313	1.00255	0.00152908	0.993756	0.00120974	0.99806	0.00070944
24.5	1.00568	0.00164116	1.00666	0.00152789	0.99548	0.00137507	0.998071	0.00074224
24.67	1.01563	0.00267724	1.01206	0.00207156	1.00127	0.00186658	0.997389	0.00086527
24.83	1.02589	0.00422358	1.0179	0.00267586	1.00897	0.00252489	0.997106	0.00095482
25	1.03359	0.00607642	1.02283	0.00306368	1.01793	0.00338715	0.997556	0.00107591
25.17	1.03982	0.00735277	1.0271	0.00332624	1.02611	0.00406106	0.999693	0.00109347
25.33	1.04196	0.00647487	1.03023	0.00343191	1.03379	0.00463609	1.00285	0.00140679
25.5	1.0439	0.00558217	1.03261	0.00351477	1.03965	0.00510634	1.00384	0.00200323
25.67	1.04278	0.00512564	1.03469	0.00350266	1.04408	0.00543103	1.00509	0.00223023
25.83	1.04564	0.00526252	1.03645	0.00353209	1.0469	0.00555076	1.00543	0.00229296
26	1.04792	0.00518408	1.03763	0.00362729	1.051	0.00572177	1.00925	0.00225041
26.17	1.05154	0.0054694	1.03963	0.00367607	1.05315	0.00578652	1.01037	0.00238656
26.33	1.05384	0.00552309	1.04111	0.00377845	1.05579	0.00587336	1.01114	0.00249544
26.5	1.05536	0.00556558	1.04321	0.00385575	1.05661	0.00589928	1.0106	0.00260221
26.67	1.05691	0.00556138	1.04394	0.00403555	1.05868	0.00588955	1.01119	0.00267916
26.83	1.0588	0.00563673	1.04505	0.00410028	1.05994	0.00586902	1.01198	0.00268536
27	1.06115	0.00573998	1.04629	0.00420278	1.06132	0.0058619	1.01161	0.00256742
27.17	1.06339	0.00596881	1.04773	0.00424192	1.06343	0.00593192	1.01265	0.00264088
27.33	1.06522	0.00612317	1.04903	0.00435984	1.0648	0.00594593	1.01278	0.00295756
27.5	1.06721	0.00625638	1.05012	0.00439146	1.0654	0.00583095	1.0166	0.00303064
27.67	1.06913	0.00627978	1.05149	0.00454677	1.06563	0.00575433	1.01703	0.00322148
27.83	1.06976	0.00629599	1.05326	0.00453839	1.06639	0.00568263	1.01874	0.00310286
28	1.07066	0.00658593	1.05479	0.00460101	1.06772	0.00570362	1.01679	0.00342178
28.17	1.0714	0.0066116	1.05609	0.0046055	1.06953	0.00574356	1.01505	0.00401584
28.33	1.07368	0.00678152	1.05702	0.00466164	1.07066	0.00582803	1.01485	0.0040934
28.5	1.07656	0.00669082	1.05845	0.00473907	1.07115	0.00581972	1.01323	0.00476147
28.67	1.07854	0.00688327	1.05889	0.00482844	1.07114	0.00587012	1.01552	0.00379002
28.83	1.08127	0.00698533	1.06049	0.00499795	1.07115	0.00588991	1.01611	0.00378138
29	1.08486	0.00715731	1.061	0.00513537	1.07254	0.00588099	1.01912	0.00335705
29.17	1.08833	0.00733278	1.06292	0.00516242	1.07304	0.00585075	1.02044	0.00338878
29.33	1.08913	0.00738027	1.06345	0.00517773	1.07437	0.00588853	1.02095	0.00340711
29.5	1.0881	0.00757495	1.0648	0.00515759	1.07518	0.00581813	1.02178	0.00342558
29.67	1.08903	0.00776536	1.06548	0.0052129	1.0756	0.00568345	1.02181	0.00349148
29.83	1.09054	0.00801291	1.06645	0.0052692	1.07551	0.00557688	1.02285	0.00367802
30	1.09317	0.00817441	1.06743	0.0053768	1.07564	0.00562439	1.02225	0.00365406
30.17	1.09397	0.00812071	1.06891	0.00545302	1.07672	0.00572749	1.02211	0.00356419
30.33	1.09661	0.00805897	1.07012	0.00551756	1.07755	0.0057984	1.02132	0.00342968
30.5	1.09801	0.0081737	1.07141	0.00562798	1.07863	0.00590229	1.02187	0.00348814
30.67	1.10123	0.00830239	1.07207	0.0057396	1.07882	0.00596525	1.02285	0.00366642
30.83	1.10194	0.00837343	1.07327	0.0059214	1.07959	0.00598163	1.02284	0.0040488
31	1.10435	0.00838956	1.07354	0.00595005	1.07941	0.00590433	1.02286	0.00404176
31.17	1.1057	0.0082776	1.07468	0.00593589	1.07978	0.00585525	1.02307	0.00398934
31.33	1.10919	0.00846101	1.07546	0.00600476	1.07984	0.00583105	1.0238	0.00371282
31.5	1.1105	0.00838202	1.07686	0.00605717	1.08018	0.00585174	1.02516	0.00380667
31.67	1.1119	0.00861364	1.07822	0.006161	1.08124	0.00587856	1.02552	0.0038504
31.83	1.11071	0.00858859	1.07937	0.00613435	1.08174	0.0058686	1.02545	0.00387345
32	1.10872	0.0087995	1.07999	0.0061598	1.08281	0.00586171	1.02569	0.00387394
32.17	1.10699	0.00899323	1.08125	0.00616542	1.08295	0.00580213	1.02425	0.00409952
32.33	1.10894	0.00927359	1.08213	0.00619652	1.08405	0.00576899	1.02483	0.00418037
32.5	1.11102	0.00948595	1.08319	0.0062017	1.08368	0.00574353	1.02339	0.00443614
32.67	1.11236	0.00967743	1.08304	0.00628764	1.08504	0.00569365	1.0267	0.00396179
32.83	1.11421	0.00948387	1.08356	0.00627333	1.08482	0.00575902	1.02717	0.00398185
33	1.11607	0.00934408	1.08469	0.00629342	1.08657	0.0057365	1.02924	0.00399978
33.17	1.11828	0.00919887	1.08617	0.0062903	1.08658	0.00582757	1.03051	0.00420433
33.33	1.11896	0.00938039	1.08758	0.00632354	1.08828	0.0058587	1.03057	0.00470957
33.5	1.12084	0.00952021	1.08815	0.00637399	1.08879	0.00593509	1.0342	0.00459472
33.67	1.12274	0.00993607	1.09089	0.00646115	1.08933	0.00590894	1.03191	0.00466472
33.83	1.12361	0.00997785	1.09406	0.00660826	1.08824	0.0058161	1.03144	0.00482744
34	1.12454	0.00989298	1.09606	0.00674429	1.08821	0.00579861	1.02956	0.00503436
34.17	1.1262	0.00959469	1.09574	0.00679807	1.08779	0.00583754	1.02916	0.00506352
34.33	1.12988	0.00953904	1.09103	0.00677347	1.08035	0.00653577	1.02906	0.00505877
34.5	1.12668	0.00964376	1.08678	0.00704274	1.06782	0.00728633	1.03176	0.00470199
34.67	1.12058	0.00987107	1.08323	0.00761151	1.05544	0.00866134	1.03505	0.00475316
34.83	1.11574	0.0101176	1.08603	0.00827872	1.05243	0.00952337	1.03731	0.00473561
35	1.12263	0.0104689	1.09283	0.00872013	1.05754	0.0101381	1.0395	0.00459298
35.17	1.13317	0.0108188	1.10247	0.00906461	1.06461	0.0102954	1.04039	0.00443773
35.33	1.14629	0.0111935	1.11207	0.00933714	1.07272	0.00992624	1.04112	0.00443904
35.5	1.15811	0.0113966	1.12214	0.00953066	1.0785	0.00938205	1.04151	0.00496975
35.67	1.17052	0.0117124	1.1314	0.00962126	1.08604	0.00888509	1.04129	0.00558777
35.83	1.18087	0.0118289	1.14148	0.00972874	1.09301	0.00863295	1.04238	0.00609136
36	1.19073	0.0121119	1.15056	0.00990491	1.10141	0.00846923	1.04346	0.00640044
36.17	1.20105	0.0123816	1.1598	0.0100039	1.10925	0.00840036	1.04644	0.0066252
36.33	1.21029	0.0127711	1.16813	0.010151	1.11742	0.00835576	1.04787	0.00688901
36.5	1.21845	0.0133941	1.17633	0.01036	1.12488	0.00835755	1.04918	0.00733423
36.67	1.2258	0.013997	1.1834	0.0105717	1.13121	0.00835007	1.05357	0.00751695
36.83	1.23369	0.0146314	1.19036	0.0107802	1.13748	0.00836611	1.05521	0.00795458
37	1.24066	0.0147709	1.19636	0.0109343	1.14299	0.00834652	1.05744	0.0081937
37.17	1.24683	0.0147867	1.20273	0.0110849	1.14822	0.00836926	1.05606	0.00854037
37.33	1.25182	0.0149937	1.2091	0.0111811	1.15322	0.00840572	1.05723	0.0087672
37.5	1.25544	0.0150933	1.21609	0.0111949	1.15791	0.00857944	1.05851	0.00910506
37.67	1.25885	0.015094	1.22003	0.0112777	1.16284	0.00871961	1.06049	0.00933292
37.83	1.26232	0.0149274	1.2237	0.0112782	1.16696	0.00886953	1.06234	0.00943181
38	1.26604	0.0149949	1.22675	0.0113725	1.17054	0.00889835	1.06374	0.00957066
38.17	1.2692	0.0152845	1.23104	0.0114553	1.17198	0.00889768	1.06423	0.00972523
38.33	1.27304	0.0156415	1.23491	0.0116114	1.17454	0.00890409	1.06472	0.00992629
38.5	1.2774	0.0157763	1.23781	0.0117901	1.17683	0.008988	1.06527	0.00998861
38.67	1.28142	0.0163358	1.24092	0.0119171	1.18101	0.00913341	1.06668	0.010077
38.83	1.28515	0.0164177	1.24268	0.0120217	1.18405	0.00926287	1.06841	0.0102438
39	1.28616	0.0165616	1.24474	0.012025	1.18621	0.00938221	1.06988	0.0103084
39.17	1.2867	0.0162271	1.2468	0.0121287	1.18736	0.00943359	1.07098	0.0103432
39.33	1.2865	0.016157	1.24892	0.0121417	1.18792	0.00948899	1.07183	0.0103542
39.5	1.28871	0.016231	1.25075	0.0121944	1.18921	0.00945969	1.07286	0.0104595
39.67	1.2911	0.0164201	1.25174	0.0121911	1.19083	0.00949111	1.0732	0.0105929
39.83	1.29345	0.0166254	1.25203	0.0122431	1.19212	0.00957762	1.07383	0.010572
40	1.2944	0.0167515	1.2527	0.0124342	1.19361	0.00963971	1.07515	0.0104254
40.17	1.29501	0.0167609	1.25408	0.0125083	1.19517	0.00960578	1.07629	0.0102984
40.33	1.29453	0.0164952	1.25534	0.0126178	1.19522	0.0096904	1.07593	0.0102525
40.5	1.29518	0.01636	1.25591	0.0125781	1.19595	0.00978277	1.07607	0.0103351
40.67	1.29636	0.0163778	1.25648	0.0127146	1.19584	0.00989966	1.07691	0.0103745
40.83	1.29811	0.0163359	1.25767	0.0128214	1.1973	0.00993964	1.07838	0.0103736
41	1.29869	0.0160983	1.25886	0.0128621	1.19815	0.0100315	1.07848	0.0103256
41.17	1.29885	0.0160066	1.25995	0.0129241	1.19851	0.0100578	1.07694	0.0103498
41.33	1.29856	0.01583	1.26097	0.0129126	1.19976	0.0100091	1.07688	0.0101824
41.5	1.29877	0.0158733	1.26078	0.0128424	1.19996	0.00994478	1.07678	0.0102346
41.67	1.29631	0.0156001	1.26097	0.0128766	1.20104	0.00992762	1.07843	0.0100852
41.83	1.29694	0.0157291	1.26067	0.0129085	1.20051	0.010027	1.07865	0.0103007
42	1.29824	0.0158297	1.26168	0.0129107	1.20085	0.0101424	1.08018	0.0103681
42.17	1.30135	0.0160267	1.26117	0.0128259	1.2007	0.0102482	1.0808	0.0103126
42.33	1.30221	0.0160002	1.26164	0.0128811	1.2012	0.0103424	1.08101	0.010215
42.5	1.3023	0.0159285	1.26248	0.0130402	1.20139	0.010383	1.08076	0.0101498
42.67	1.30318	0.0160174	1.26377	0.0131392	1.20148	0.0104	1.08154	0.0103642
42.83	1.30391	0.0164549	1.26443	0.0131586	1.20226	0.01035	1.08215	0.0103235
43	1.30406	0.0165006	1.26456	0.0131387	1.20207	0.0103032	1.08229	0.0102856
43.17	1.30431	0.0164069	1.26456	0.0131096	1.20344	0.0103165	1.08208	0.010116
Occupancy
sgCont	sgLDHA	sgLDHB	sgLDHA/B						Brown-Forsythe test			ANOVA summary			Dunnett's multiple comparisons test	Mean Diff,	95% CI of diff,	Significant?	Summary	Adjusted P Value
0.3975	0.369838	0.398049	0.0233818						F (DFn, DFd)	1,901 (3, 148)		F	78.68
0.3661	0.453318	0.465797	0.131673						P value	0.132		P value	< 0,0001		sgCont vs. sgLDHA	-0.1243	-0,2027 to -0,04578	Yes	***	0.0007
0.3074	0.585936	0.407782	0.0226117						P value summary	ns		P value summary	****		sgCont vs. sgLDHB	-0.1118	-0,1943 to -0,02923	Yes	**	0.0046
0.343727	0.542133	0.447025	0.0358814						Significantly different standard deviations? (P < 0.05)	No		Are differences among means statistically significant? (P < 0.05)	Yes		sgCont vs. sgLDHA/B	0.3688	0,2855 to 0,4520	Yes	****	< 0,0001
0.489214	0.459343	0.801329	0.336827									R square	0.6146
0.603308	0.591299	0.837248	0.0366733
0.355615	0.664984	0.699545	0.175679
0.529914	0.737067	0.598864	0.149754
0.646893	0.699718	0.861203	0.63539
0.49643	0.734312	0.590211	0.229036
0.360823	0.760478	0.682791	0.263408
0.639316	0.623377	0.690416	0.204208
0.540024	0.99157	0.66052	0.145399
0.420951	0.940371	0.598022	0.308268
0.072702	0.388544	0.657541	0.18682
0.613781	0.653227	0.622873	0.266819
0.526811	0.805935	0.595443	0.0545996
0.437149	0.525158	0.800542	0.0218802
0.395813	0.807149	0.706135	-0.0712051
0.418245	0.755428	0.589406	0.0263899
0.494726	0.531733	0.657122	0.27525
0.420178	0.665029	0.636261	0.25104
0.56577	0.580335	0.643918	0.291176
0.472892	0.626319	0.590713	0.835901
0.481464	0.748365	0.684013	0.266529
0.546196	0.733716	0.77384	0.0804236
0.673422	0.655736	0.635839	0.0100024
0.706912	0.573254	0.38361	0.0132091
0.58327	0.718256	0.635967	0.0261968
0.663114	0.788998	0.655848	-0.0108492
0.549738	0.73025	0.672447	-0.0557558
0.5243	0.691145	0.73395	-0.00311531
0.935783	0.672054	0.570592	-0.0457621
0.833061	0.869777	0.627281
0.566699	0.728609
0.414767	0.645697
0.454246	0.539424
0.404531	0.524754
0.702696	0.453063
0.652667	0.459926
0.777175	0.54737
0.650562
0.545305
0.46915
Lactate production
sgCont	sgLDHA	sgLDHB	sgLDHA/B						Brown-Forsythe test			ANOVA summary			Dunnett's multiple comparisons test	Mean Diff,	95% CI of diff,	Significant?	Summary	Adjusted P Value
0.0603	0.07985	0.0288	0.007749						F (DFn, DFd)	2,312 (3, 148)		F	50.43
0.0278	0.04759	0.05729	0.006866						P value	0.0785		P value	< 0,0001		sgCont vs. sgLDHA	0.005842	-0,003547 to 0,01523	No	ns	0.3214
0.0315	0.07368	0.0381	0.03497						P value summary	ns		P value summary	****		sgCont vs. sgLDHB	0.01303	0,003153 to 0,02291	Yes	**	0.0059
0.0504	0.04424	0.04165	0.008883						Significantly different standard deviations? (P < 0.05)	No		Are differences among means statistically significant? (P < 0.05)	Yes		sgCont vs. sgLDHA/B	0.04838	0,03842 to 0,05835	Yes	****	< 0,0001
0.05968	0.05889	0.04277	0.003996									R square	0.5055
0.05672	0.03876	0.03967	0.001482
0.06979	0.04114	0.03771	0.003834
0.04935	0.03291	0.05303	0.005826
0.04846	0.04451	0.02899	0.05522
0.06842	0.03296	0.04448	0.002889
0.0759	0.0304	0.04056	0.003148
0.05765	0.01992	0.03995	0.001772
0.06133	0.04245	0.04355	0.01609
0.05892	0.03662	0.03485	0.006873
0.02202	0.06582	0.03842	0.003435
0.0742	0.03461	0.03045	0.003988
0.0644	0.04718	0.05697	0.004883
0.06137	0.04385	0.02867	0.004315
0.05727	0.03662	0.06509	0.006125
0.05218	0.03086	0.0576	0.006637
0.05181	0.06171	0.06194	0.003522
0.07189	0.0741	0.05026	0.005809
0.06611	0.08334	0.04876	0.005559
0.05597	0.08087	0.04095	0.07827
0.04669	0.04978	0.06438	0.001427
0.07713	0.06646	0.02934	0.03067
0.05064	0.05749	0.0596	0.01355
0.05668	0.07067	0.07402	0.009389
0.05883	0.06767	0.06378	0.01756
0.04935	0.08193	0.06722	0.003118
0.0795	0.059	0.06053	0.01284
0.06518	0.07036	0.04436	0.01705
0.01085	0.07278	0.04506	0.02096
0.04721	0.06255	0.06432
0.06599	0.04399
0.1552	0.04933
0.1042	0.07663
0.07276	0.07739
0.08097	0.04144
0.08441	0.04593
0.0638	0.07572
0.04259
0.0233
0.08513

## Sheet: Fig3d
Spheroid Growth for CRISPR P3 cell lines
Growth (%)
sgCont	sgLDHA	sgLDHB	sgLDHA/B		Brown-Forsythe test			Kruskal-Wallis test			Dunn's multiple comparisons test	Mean rank diff,	Significant?	Summary	Adjusted P Value
49.9988	23.8056	46.6673	-60.1864		F (DFn, DFd)	7,281 (3, 188)		P value	< 0,0001
45.2891	27.9646	53.4337	-55.072		P value	0.0001		Exact or approximate P value?	Approximate		sgCont vs. sgLDHA	43.96	Yes	***	0.0003
46.6349	24.0148	45.7959	-48.2061		P value summary	***		P value summary	****		sgCont vs. sgLDHB	12.79	No	ns	0.7785
42.1201	27.1937	39.5794	-51.1389		Significantly different standard deviations? (P < 0.05)	Yes		Do the medians vary signif. (P < 0.05)	Yes		sgCont vs. sgLDHA/B	114.9	Yes	****	< 0,0001
38.6597	22.2048	40.7473	-54.0782					Number of groups	4
45.5755	24.2296	45.9096	-52.1012					Kruskal-Wallis statistic	123.3
42.2723	17.0533	48.6597	-57.5467
54.6704	22.0213	53.8437	-56.6421
51.5518	26.1937	53.0239	-58.8848
40.9053	25.1327	43.7608	-47.4572
42.0467	26.4021	34.3247	-45.6719
38.9286	25.2084	44.7159	-48.7738
37.3027	19.5758	40.82	-54.9251
37.3547	24.8213	49.0228	-48.8428
41.9972	17.2672	42.6441	-43.5104
47.9434	25.5519	50.2587	-50.0688
26.8791	13.1505	27.414	-39.9116
23.6677	19.3877	15.4126	-42.9246
22.8078	18.4208	9.93627	-42.7342
26.6135	17.1737	14.2468	-46.3082
35.6579	17.3365	14.7766	-48.1141
25.7968	18.0481	19.5551	-33.8891
25.5555	10.1015	22.6658	-44.1414
27.8789	6.85127	19.1436	-39.3137
29.1899	11.9424	22.9487	-41.0759
21.5123	17.5114	21.942	-36.1245
20.0811	13.441	18.2235	-48.9189
22.7766	17.7091	21.6693	-34.1508
21.7476	18.7496	13.3625	-47.1383
10.5708	18.408	16.2527	-37.0827
21.6134	14.2911	17.7261	-43.6068
31.0197	-0.218611	21.3646	-41.8794
57.9132	50.4252	41.7468	-41.6563
41.8672	35.735	41.23	-39.9309
44.1603	30.7764	45.7229	-39.2221
54.3566	34.6302	35.1731	-44.7479
56.5603	31.6093	46.0491	-43.5671
50.2093	37.7997	40.7858	-36.4195
55.5261	37.2679	37.2517	-41.4735
61.6933	39.1378	52.9091	-35.5002
55.9569	41.0428	59.3396	-39.8387
46.5085	39.938	55.4928	-34.5413
45.0213	44.3441	35.7447	-40.3471
51.793	41.6403	40.1377	-38.8273
52.5687	36.7773	46.3654	-45.1406
58.1303	42.6598	44.0161	-42.0839
52.6278	35.8627	43.3785	-44.4959
55.5767	43.9261	54.7501	-43.8436
Dead area (relative to the core)
sgCont	sgLDHA	sgLDHB	sgLDHAB		Brown-Forsythe test			Kruskal-Wallis test			Dunn's multiple comparisons test	Mean rank diff,	Significant?	Summary	Adjusted P Value
0.152594	0.118252	0.0883653	6.27811		F (DFn, DFd)	63,23 (3, 188)		P value	< 0,0001
0.250334	0.166289	0.137933	5.28479		P value	< 0,0001		Exact or approximate P value?	Approximate		sgCont vs. sgLDHA	20.94	No	ns	0.1949
0.20428	0.239244	0.090508	5.55945		P value summary	****		P value summary	****		sgCont vs. sgLDHB	57	Yes	****	< 0,0001
0.126288	0.219813	0.119164	5.43514		Significantly different standard deviations? (P < 0.05)	Yes		Do the medians vary signif. (P < 0.05)	Yes		sgCont vs. sgLDHAB	-70.02	Yes	****	< 0,0001
0.337809	0.115588	0.0821234	5.28528					Number of groups	4
0.242654	0.238649	0.0682231	6.02327					Kruskal-Wallis statistic	133.3
0.227994	0.196248	0.098299	6.07365
0.32491	0.140955	0.109126	6.1274
0.317572	0.157963	0.0672322	5.20239
0.331899	0.12838	0.0932022	4.61046
0.182158	0.171994	0.107313	5.11798
0.178166	0.141797	0.0710297	5.53398
0.30172	0.186941	0.098611	5.99823
0.310503	0.272319	0.0654013	5.75205
0.194574	0.243093	0.0664131	4.7052
0.0916724	0.191523	0.074471	4.92298
0.449271	0.150931	0.129786	3.22411
0.405285	0.160816	0.134861	3.7925
0.2365	0.245037	0.205108	3.52075
0.149994	0.206025	0.334465	3.63044
0.355713	0.116834	0.144432	3.96627
0.180488	0.167836	0.225551	2.88019
0.207826	0.291265	0.201145	3.82178
0.328292	0.314613	0.276506	3.42849
0.286958	0.272715	0.19456	3.72223
0.286945	0.208769	0.203926	3.31117
0.275346	0.161306	0.185687	4.11049
0.272137	0.220379	0.122244	3.20823
0.277086	0.214359	0.197586	3.9338
0.158855	0.22633	0.089955	3.44993
0.137214	0.196244	0.0969496	3.86749
0.234814	0.0982473	0.114072	3.02779
0.161509	0.10646	0.20903	3.73016
0.375607	0.193091	0.166961	4.18965
0.201751	0.256649	0.213699	4.21424
0.196125	0.559177	0.17642	4.10394
0.291788	0.380579	0.107601	4.54936
0.391547	0.223888	0.17918	3.6102
0.179311	0.326043	0.199187	4.29345
0.431396	0.192372	0.193468	3.40989
0.261751	0.23077	0.0773487	3.68755
0.176174	0.117646	0.164666	3.56666
0.429128	0.141528	0.0863847	3.97545
0.218299	0.151226	0.113262	3.74331
0.198835	0.220097	0.0492395	5.29875
0.246636	0.226244	0.162169	4.31857
0.175527	0.231766	0.0858842	4.053
0.246301	0.166532	0.0874326	3.63405

## Sheet: Fig3e
Spheroid invasion of CRISPR P3 cell lines
LDHA
21% O2		0.1% O2			Two-way ANOVA	Ordinary		Tukey's multiple comparisons test	Mean Diff,	95% CI of diff,	Significant?	Summary	Adjusted P Value
sgCont	sgLDHA	sgCont	sgLDHA		Alpha	0.05
0.74849	0.514499	1.29227	1.12626					21% O2:sgCont vs. 21% O2:sgLDHA	0.1938	0,05451 to 0,3330	Yes	**	0.0025
1.17489	0.757652	1.24489	1.1023					21% O2:sgCont vs. 0.1% O2:sgCont	-0.3105	-0,4528 to -0,1681	Yes	****	< 0,0001
0.981071	0.599778	1.05789	0.765405					21% O2:sgCont vs. 0.1% O2:sgLDHA	0.062	-0,08390 to 0,2079	No	ns	0.6822
1.00151	0.541281	1.27535	1.05225					21% O2:sgLDHA vs. 0.1% O2:sgCont	-0.5042	-0,6451 to -0,3634	Yes	****	< 0,0001
0.807692	0.654752	1.39458	0.804168					21% O2:sgLDHA vs. 0.1% O2:sgLDHA	-0.1318	-0,2762 to 0,01273	No	ns	0.0868
1.17771	0.717479	1.29261	1.05437					0.1% O2:sgCont vs. 0.1% O2:sgLDHA	0.3725	0,2250 to 0,5199	Yes	****	< 0,0001
1.10864	0.467278	1.4802	1.09313
0.885135	0.676601	1.4702	0.73087
0.987973	0.741442	0.854393	0.766109
0.949708	0.765405	1.12981	0.562424
1.02446	0.989529	1.84205	0.746375
1.12118	0.585683	1.32428	0.890153
1.0242	1.15445	1.32577	1.28695
0.967287	0.631494	1.55775	1.14952
1.04006	1.17066	1.28025	0.989635
0.885135	0.704088	1.29931	1.36723
0.987973	0.987407	1.39808	0.750247
0.949708	1.0406	1.30776	0.933366
1.02446	1.01046	1.30102	0.681145
1.12118	0.895338	1.20107	0.910661
1.0242	0.912789	1.2018
0.967287	0.886236	1.31071
1.04006	0.916495
	1.0174
LDHB
21% O2		0.1% O2			Two-way ANOVA	Ordinary		Tukey's multiple comparisons test	Mean Diff,	95% CI of diff,	Significant?	Summary	Adjusted P Value
sgCont	sgLDHB	sgCont	sgLDHB		Alpha	0.05
0.892	1.699	1.253	1.756					21% O2:sgCont vs. 21% O2:sgLDHB	-0.4731	-0,6140 to -0,3321	Yes	****	< 0,0001
1.026	1.954	1.201	2.06					21% O2:sgCont vs. 0.1% O2:sgCont	-0.2113	-0,3507 to -0,07177	Yes	***	0.0008
1.017	1.59	0.69	1.813					21% O2:sgCont vs. 0.1% O2:sgLDHB	-0.6613	-0,8023 to -0,5203	Yes	****	< 0,0001
0.94	1.604	1.124	1.62					21% O2:sgLDHB vs. 0.1% O2:sgCont	0.2618	0,1208 to 0,4028	Yes	****	< 0,0001
1.045	1.603	1.276	1.863					21% O2:sgLDHB vs. 0.1% O2:sgLDHB	-0.1883	-0,3307 to -0,04578	Yes	**	0.0045
0.998	1.699	1.361	1.509					0.1% O2:sgCont vs. 0.1% O2:sgLDHB	-0.4501	-0,5911 to -0,3091	Yes	****	< 0,0001
1.054	1.782	1.381	1.741
1.028	1.33	1.296	1.862
1.056	1.4	1.475	1.202
1.121	1.484	1.25	1.613
0.756	1.699	1.039	1.581
1.134	1.418	1.112	1.618
1.144	1.607	1.132	1.652
0.791	1.248	1.043	2.035
1.055	1.385	0.959	1.771
0.942	1.329	1.155	1.41
0.996	1.27	1.176	1.728
1.052	1.254	1.211	1.585
0.851	1.343	1.37	1.49
0.903	1.23	1.217	1.648
0.901	1.306	1.303	1.141
1.137	1.243	1.35	1.496
1.026	1.417	1.207	2.018
1.133		1.488
LDHA/B
21% O2		0.1% O2			Two-way ANOVA	Ordinary		Tukey's multiple comparisons test	Mean Diff,	95% CI of diff,	Significant?	Summary	Adjusted P Value
sgCont	sgLDHA/B	sgCont	sgLDHA/B		Alpha	0.05
0.875182	0.507106	1.15789	0.471188					21% O2:sgCont vs. 21% O2:sgLDHA/B	0.4096	0,2845 to 0,5348	Yes	****	< 0,0001
0.918511	0.683037	1.11719	0.399373					21% O2:sgCont vs. 0.1% O2:sgCont	-0.2589	-0,3853 to -0,1324	Yes	****	< 0,0001
0.934574	0.718998	1.1722	0.439607					21% O2:sgCont vs. 0.1% O2:sgLDHA/B	0.7486	0,6208 to 0,8765	Yes	****	< 0,0001
0.924657	0.558826	1.22663	0.487099					21% O2:sgLDHA/B vs. 0.1% O2:sgCont	-0.6685	-0,7922 to -0,5448	Yes	****	< 0,0001
0.923393	0.643849	1.22972	0.465282					21% O2:sgLDHA/B vs. 0.1% O2:sgLDHA/B	0.339	0,2139 to 0,4642	Yes	****	< 0,0001
1.05868	0.817272	1.30424	0.344341					0.1% O2:sgCont vs. 0.1% O2:sgLDHA/B	1.008	0,8811 to 1,134	Yes	****	< 0,0001
0.934499	0.479209	1.27886	0.181815
1.13048	0.637136	1.14315	0.19232
1.07399	0.7348	1.26512	0.0636633
0.943012	0.417899	1.12419	0.141799
0.918022	0.837193	0.972383	0.20422
0.840661	0.656207	1.14179	0.274357
1.18893	0.634063	1.14703	0.38209
0.986012	0.47424	1.25195	0.19232
0.990435	0.7348	1.23153	0.370203
0.83121	1.10324	1.20301	0.0451948
0.979857	0.225998	1.24081	0.0151178
1.22408	0.468652	1.54862	0.0385754
0.986433	0.406448	1.2386	0.0114085
0.815971	0.518221	1.1242	0.0225608
0.930593	0.261047	1.40201	0.0150385
0.840392	0.232172	1.37868	0.0184366
	0.301331	1.26866
	0.29196

## Sheet: Fig3g
In vivo P3 single KO
Core
sgCont	sgLDHA	sgLDHB		Brown-Forsythe test			ANOVA summary			Dunnett's multiple comparisons test	Mean Diff,	95% CI of diff,	Significant?	Summary	Adjusted P Value
14.887	7.489	12.123		F (DFn, DFd)	0,9239 (2, 12)		F	1.351
9.059	7.043	9.292		P value	0.4234		P value	0.2958		sgCont vs. sgLDHA	2.007	-1,194 to 5,207	No	ns	0.2399
8.861	10.963	9.864		P value summary	ns		P value summary	ns		sgCont vs. sgLDHB	0.4612	-2,739 to 3,662	No	ns	0.9105
13.367	9.873	11.543		Significantly different standard deviations? (P < 0.05)	No		Are differences among means statistically significant? (P < 0.05)	No
10.117	10.89	11.163					R square	0.1837
Invasion
sgCont	sgLDHA	sgLDHB		Brown-Forsythe test			ANOVA summary			Dunnett's multiple comparisons test	Mean Diff,	95% CI of diff,	Significant?	Summary	Adjusted P Value
5.704	2.998	4.795		F (DFn, DFd)	0,05587 (2, 12)		F	0.5839
5.258	5.386	6.058		P value	0.9459		P value	0.5728		sgCont vs. sgLDHA	-0.9532	-3,163 to 1,257	No	ns	0.4736
3.4	6.007	3.601		P value summary	ns		P value summary	ns		sgCont vs. sgLDHB	-0.5172	-2,727 to 1,693	No	ns	0.7863
5.385	6.353	7.087		Significantly different standard deviations? (P < 0.05)	No		Are differences among means statistically significant? (P < 0.05)	No
3.255	7.024	4.047					R square	0.08869

## Sheet: Fig3h
In vivo P3 double KO
Core
sgCont	sgLDHA/B		F test to compare variances			Unpaired t test
24.4566	12.8568		F,DFn, Dfd	1,109, 3, 4		P value	0.0004
22.7158	10.998		P value	0.8868		P value summary	***
22.2195	5.30579		P value summary	ns		Significantly different? (P < 0.05)	Yes
30.393	13.1795		Significantly different? (P < 0.05)	No		One- or two-tailed P value?	Two-tailed
27.6115						t, df	t=6,265 df=7
Invasion
sgCont	sgLDHA/B		F test to compare variances			Unpaired t test
6.54819	3.20646		F,DFn, Dfd	10,81, 4, 3		P value	0.0115
7.4647	1.84676		P value	0.0794		P value summary	*
5.07784	2.78788		P value summary	ns		Significantly different? (P < 0.05)	Yes
12.6174	3.9182		Significantly different? (P < 0.05)	No		One- or two-tailed P value?	Two-tailed
8.34088						t, df	t=3,399 df=7

## Sheet: Fig3i
Survival curves
Days elapsed	sgCont	sgLDHA	sgLDHB	sgLDHA/B		sgCont vs sgLDHA	Log-rank (Mantel-Cox) test			Gehan-Breslow-Wilcoxon test			Hazard Ratio (logrank)
45			1				Chi square	3.56		Chi square	3.635		Ratio (and its reciprocal)	2.392	0.4181
45			1				df	1		df	1		95% CI of ratio	1,228 to 14,68	0,06810 to 0,8146
48			1				P value	0.0592		P value	0.0566
49			1				P value summary	ns		P value summary	ns
54			2				Are the survival curves sig different?	No		Are the survival curves sig different?	No
57			2
74	1					sgCont vs sgLDHB	Log-rank (Mantel-Cox) test			Gehan-Breslow-Wilcoxon test			Hazard Ratio (logrank)
74	1						Chi square	10.7		Chi square	9.495		Ratio (and its reciprocal)	0.2032	4.922
74	1						df	1		df	1		95% CI of ratio	0,003270 to 0,1498	6,677 to 305,9
75	1						P value	0.0011		P value	0.0021
75		1					P value summary	**		P value summary	**
77		1					Are the survival curves sig different?	Yes		Are the survival curves sig different?	Yes
77		1
78	1					sgCont vs sgLDHA/B	Log-rank (Mantel-Cox) test			Gehan-Breslow-Wilcoxon test			Hazard Ratio (logrank)
78	1						Chi square	11.62		Chi square	10.21		Ratio (and its reciprocal)	4.143	0.2414
78	2						df	1		df	1		95% CI of ratio	5,690 to 99,28	0,01007 to 0,1757
80		1					P value	0.0007		P value	0.0014
85		1					P value summary	***		P value summary	**
90		1					Are the survival curves sig different?	Yes		Are the survival curves sig different?	Yes
90		2
97				1
99				1
101				1
102				1
103				1
104				1
108				2
