# Supplementary material for: Specific expression of lactate dehydrogenases in glioblastoma controls intercellular lactate transfer to promote tumor growth and invasion
Source: Research Square preprint supplement (doi:10.21203/rs.3.rs-690811/v1), 2021-07-09
Supplement: Supplementary file 15 [file 768f16006d88001b7ba0e286.xlsx]

## Sheet: Fig2a
P3 Wild type cell line
LDHA/Tubuline						Brown-Forsythe test			ANOVA summary			Dunnett's multiple comparisons test	Mean Diff,	95% CI of diff,	Significant?	Summary	Adjusted P Value
0h	6h	24h	48h	72h		F (DFn, DFd)	0,7458 (4, 15)		F	19.49
0.044	0.029	0.086	0.135	0.211		P value	0.5757		P value	< 0,0001		0h vs. 6h	0.002	-0,04260 to 0,04660	No	ns	0.9998
0.037	0.034	0.064	0.111	0.124		P value summary	ns		P value summary	****		0h vs. 24h	-0.0345	-0,07910 to 0,01010	No	ns	0.1541
0.072	0.075	0.115	0.121	0.168		Significantly different standard deviations? (P < 0.05)	No		Are differences among means statistically significant? (P < 0.05)	Yes		0h vs. 48h	-0.07775	-0,1223 to -0,03315	Yes	***	0.0009
0.043	0.05	0.069	0.14	0.156					R square	0.8387		0h vs. 72h	-0.1158	-0,1603 to -0,07115	Yes	****	< 0,0001
LDHB/Tubuline						Brown-Forsythe test			ANOVA summary			Dunnett's multiple comparisons test	Mean Diff,	95% CI of diff,	Significant?	Summary	Adjusted P Value
0h	6h	24h	48h	72h		F (DFn, DFd)	0,4757 (4, 15)		F	0.1625
2.061	1.705	2.184	2.388	3.017		P value	0.753		P value	0.9541		0h vs. 6h	-0.062	-1,393 to 1,269	No	ns	0.9998
1.223	1.366	1.392	1.333	1.385		P value summary	ns		P value summary	ns		0h vs. 24h	-0.129	-1,460 to 1,202	No	ns	0.9963
2.519	2.869	2.961	2.673	2.698		Significantly different standard deviations? (P < 0.05)	No		Are differences among means statistically significant? (P < 0.05)	No		0h vs. 48h	-0.234	-1,565 to 1,097	No	ns	0.9675
1.51	1.621	1.292	1.855	1.61					R square	0.04152		0h vs. 72h	-0.3492	-1,680 to 0,9813	No	ns	0.8822

## Sheet: Fig2b
Lactate secretion in P3 cell line (Relative Light Unit)
21% O2	0,1% O2		F test to compare variances			Unpaired t test
592818	1110471		F,DFn, Dfd	1,408, 2, 2		P value	< 0,0001
549352	1163376		P value	0.8304		P value summary	****
616144	1155588		P value summary	ns		Significantly different? (P < 0.05)	Yes
			Significantly different? (P < 0.05)	No		One- or two-tailed P value?	Two-tailed
						t, df	t=21,77 df=4

## Sheet: Fig2c
LDHs activity in P3 cell line (mOD/min @ 450nm)
21% O2	0,1% O2		F test to compare variances			Unpaired t test
28.8916	108.603		F,DFn, Dfd	1,286, 3, 3		P value	< 0,0001
27.9248	108.073		P value	0.8413		P value summary	****
39.3479	98.3374		P value summary	ns		Significantly different? (P < 0.05)	Yes
40.1608	98.2867		Significantly different? (P < 0.05)	No		One- or two-tailed P value?	Two-tailed
						t, df	t=15,80 df=6

## Sheet: Fig2d
LDHB activity in P3 cell line (mOD/min @ 450nm)
21% O2	0,1% O2		F test to compare variances			Unpaired t test
101.6	110.2		F,DFn, Dfd	9,910, 2, 2		P value	0.5447
109.8	78.89		P value	0.1833		P value summary	ns
113.3	112.9		P value summary	ns		Significantly different? (P < 0.05)	No
			Significantly different? (P < 0.05)	No		One- or two-tailed P value?	Two-tailed
						t, df	t=0,6610 df=4

## Sheet: Fig2e
Spheroid Growth for P3 cell line
Cont				LA 20 mM					F test to compare variances (72h)			Unpaired t test
0h	24h	48h	72h	0h	24h	48h	72h		F,DFn, Dfd	1,852, 29, 28		P value	< 0,0001
0	8.74	18.37	31.8	0	2.51	6.39	7.68		P value	0.1069		P value summary	****
0	10.17	22.18	35.18	0	2.84	12.71	16.63		P value summary	ns		Significantly different? (P < 0.05)	Yes
0	8.91	16.69	25.33	0	5	13.61	15.91		Significantly different? (P < 0.05)	No		One- or two-tailed P value?	Two-tailed
0	8.22	22.89	36.36	0	6.66	16.16	19.9					t, df	t=13,12 df=57
0	8.51	19.5	32.02	0	5.29	15.54	19.23
0	10.34	22.64	38.52	0	3.34	9.64	11.21
0	9.06	18.68	34.76	0	5.82	12.57	14.1
0	12.38	23.9	36.16	0	6.46	8.56	11.52
0	10.02	22.87	36.29	0	4.39	3.64	5.71
0	6.42	20	35.89	0	4.47	13.51	16.57
0	12.35	29.38	48.79	0	11.64	20.57	33.98
0	14.27	35.22	52.71	0	4.66	21.48	31.87
0	10.1	21.4	53.63	0	0.1	15.72	25.67
0	13.81	32.07	52.65	0	6.85	16	23.05
0	18.61	38.03	54.47	0	6.04	11.78	16.5
0	9.08	29.15	47.98	0	2.29	6.4	8.09
0	9.04	25.62	49.57	0	3.41	9.61	15.4
0	9.69	29.32	50.95	0	9.4	15.44	20.44
0	13.06	25.83	46.02	0	11.68	21.27	29.29
0	17.02	32.97	53.53	0	1.86	6.92	13.18
0	11.4	31.47	52.19	0	7.73	14.88	21.33
0	7.8	22.28	43.5	0	5.2	15.06	22.36
0	14.73	29.64	51.39	0	4.87	12.24	21.39
0	8.47	28.32	47.6	0	6.36	13.65	21.57
0	9.11	28.76	48.71	0	3.65	13.09	18.88
0	11.73	33.47	54.33	0	7.54	14.28	22.69
0	15.65	34.85	54.35	0	0.09	7.57	15.43
0	17.63	36.27	58.87	0	8.62	15.52	19
0	11.74	30.97	52.78	0	0.46	11.19	16.45
0	14.85	31.46	57.5

## Sheet: Fig2f
Spheroid invasion of P3 cell line
Ctrl	LA 10 mM	LA 20 mM		Brown-Forsythe test			Kruskal-Wallis test			Dunn's multiple comparisons test	Mean rank diff,	Significant?	Summary	Adjusted P Value
1.082	1.777	1.7		F (DFn, DFd)	13,21 (2, 90)		P value	< 0,0001
1.259	1.543	1.941		P value	< 0,0001		Exact or approximate P value?	Approximate		Ctrl vs. LA 10 mM	-34.07	Yes	****	< 0,0001
0.953	1.601	1.823		P value summary	****		P value summary	****		Ctrl vs. LA 20 mM	-58.86	Yes	****	< 0,0001
0.998	1.442	1.884		Significantly different standard deviations? (P < 0.05)	Yes		Do the medians vary signif. (P < 0.05)	Yes		LA 10 mM vs. LA 20 mM	-24.79	Yes	***	0.0009
0.922	1.188	2.154					Number of groups	3
0.907	1.347	2.634					Kruskal-Wallis statistic	73.26
0.95	1.292	1.944
0.929	1.424	2.127
1.218	1.846	2.811
1.138	1.955	2.442
1.124	2.051	2.392
0.908	2.015	2.647
0.973	2.035	2.446
0.915	1.668	2.737
0.849	1.653	2.349
0.876	1.543	2.071
1.078	2.197	1.814
1.209	1.651	1.55
0.991	1.714	1.579
0.994	1.489	1.936
0.922	1.462	2.176
0.987	1.736	1.623
1.164	1.563	2.426
0.655	1.55	2.449
1.017	1.448	2.425
0.853	1.13	2.712
0.94	1.526	2.962
0.98	1.624	2.346
1.012	1.87	2.35
1.055	1.81	2.487
1.142	1.675
	1.478

## Sheet: Fig2g
Spheroid invasion of P3 cell line
Glucose	W/O Glucose						Brown-Forsythe test			Kruskal-Wallis test			Dunn's multiple comparisons test	Mean rank diff,	Significant?	Summary	Adjusted P Value
Ctrl+	Ctrl-	LA	HCl	Rotenone	LA + Rotenone		F (DFn, DFd)	10,00 (5, 134)		P value	< 0,0001
2.51137	0.95832	4.66048	1.40348	0.297233	0.471876		P value	< 0,0001		Exact or approximate P value?	Approximate		Ctrl+ vs. Ctrl-	56.39	Yes	****	< 0,0001
2.71876	0.759371	5.29177	1.72731	0.481071	0.568947		P value summary	****		P value summary	****		Ctrl+ vs. LA	-13.11	No	ns	> 0,9999
2.72782	1.06231	5.09492	1.55359	0.374119	0.527602		Significantly different standard deviations? (P < 0.05)	Yes		Do the medians vary signif. (P < 0.05)	Yes		Ctrl+ vs. HCl	25.14	No	ns	0.505
3.72169	1.18151	4.63155	1.65618	0.597503	0.503398					Number of groups	6		Ctrl+ vs. Rotenone	96.39	Yes	****	< 0,0001
4.65077	1.24236	3.61558	1.40097	0.478526	0.503586					Kruskal-Wallis statistic	126		Ctrl+ vs. LA + Rotenone	71.31	Yes	****	< 0,0001
5.25553	0.88568	5.56461	1.63598	0.397235	0.457238								Ctrl- vs. LA	-69.51	Yes	****	< 0,0001
4.72507	0.964356	3.81491	1.47429	0.454261	0.604873								Ctrl- vs. HCl	-31.25	No	ns	0.1145
4.07591	0.94609	4.46603	1.63803	0.39032	0.390541								Ctrl- vs. Rotenone	40	Yes	*	0.011
2.67826	1.00058	3.70901	1.74529	0.326381	0.470245								Ctrl- vs. LA + Rotenone	14.92	No	ns	> 0,9999
2.59502	0.985599	3.50419	1.79055	0.332074	0.41968								LA vs. HCl	38.26	Yes	*	0.0211
2.79562	0.927264	3.09998	1.6333	0.371144	0.527784								LA vs. Rotenone	109.5	Yes	****	< 0,0001
1.59216	1.17451	3.15433	1.66589	0.320153	0.554402								LA vs. LA + Rotenone	84.42	Yes	****	< 0,0001
2.52837	0.855521	3.25125	1.46834	0.288649	0.45597								HCl vs. Rotenone	71.25	Yes	****	< 0,0001
2.52945	1.0569	3.4017	1.61154	0.384761	0.538813								HCl vs. LA + Rotenone	46.17	Yes	**	0.0012
1.24824	0.981995	3.04756	1.89315	0.280115	0.473417								Rotenone vs. LA + Rotenone	-25.08	No	ns	0.5119
2.84407	1.01763	3.08354	1.81754	0.499188	0.518232
2.54108	1.1259	2.53607	1.67047	0.414335	0.683995
3.49297	0.918179	2.51724	1.73894	0.461507	1.31975
2.08799	0.893625	2.84631	2.15264	0.349832	1.44695
2.91393	1.07336	2.85881	1.87327	0.431608	1.35013
2.33586	0.980672	3.23619	1.67916	0.429238	1.19756
2.63922	0.832617	2.98658	2.08863	0.267674	1.26259
3.14885	1.02361		2.31568	0.28154	0.884668
	1.15203		2.05134		0.948553

## Sheet: Fig2h
Oxygraphy on P3 cell line
Respiration JO2 (nmol/min/mg of protein)
Basal			Non phos			Uncoupled				Two-way ANOVA	Ordinary		Tukey's multiple comparisons test	Mean Diff,	95% CI of diff,	Significant?	Summary	Adjusted P Value
Complete medium	Glucose	Lactate	Complete medium	Glucose	Lactate	Complete medium	Glucose	Lactate		Alpha	0.05
13.7497	10.8206	18.6406	6.75561	4.27743	5.20278	21.4591	13.4825	7.76755					Basal
13.8004	10.8598	15.43	6.00578	2.12562	6.58182	19.0395	12.2352	18.6667					NBMc vs. Glucose	2.944	-14,31 to 20,20	No	ns	0.9997
14.4143	15.3406	20.2687	8.14726	5.74748	11.1035	22.8123	20.7618						NBMc vs. Lactate	-3.341	-21,74 to 15,06	No	ns	0.9995
32.1329	30.4035	37.6176	10.0766	8.9002	8.40524	49.7064	20.4113						Glucose vs. Lactate	-6.284	-25,40 to 12,83	No	ns	0.973
19.3952	16.0994		8.93645	6.38368		30.5692	41.7554	22.998
24.3989			9.23712			45.55		34.9345					Non Phos
													NBMc vs. Glucose	2.706	-14,55 to 19,96	No	ns	0.9998
													NBMc vs. Lactate	0.3698	-18,03 to 18,77	No	ns	> 0,9999
													Glucose vs. Lactate	-2.336	-21,45 to 16,78	No	ns	> 0,9999
													Uncoupled
													NBMc vs. Glucose	9.794	-7,463 to 27,05	No	ns	0.6367
													NBMc vs. Lactate	10.43	-7,965 to 28,83	No	ns	0.6377
													Glucose vs. Lactate	0.6376	-18,48 to 19,76	No	ns	> 0,9999
Inhibitor sensibility (% of JO2 Uncoupled)
Rotenone			Atpenin A5			Antimycin A				Two-way ANOVA	Ordinary		Tukey's multiple comparisons test	Mean Diff,	95% CI of diff,	Significant?	Summary	Adjusted P Value
Complete medium	Glucose	Lactate	Complete medium	Glucose	Lactate	Complete medium	Glucose	Lactate		Alpha	0.05
67.0266	88.5249	88.0222	5.68462	1.56629	1.052	27.2888	9.9088	10.9258					Rotenone
74.8477	86.0365	93.2609	0	0	0	25.1523	14.2406	17.0538					Complete medium vs. Glucose	-3.62	-19,75 to 12,51	No	ns	0.9976
83.7176	69.1312	86.1412	0	0	0	16.2824	30.8972	14.1148					Complete medium vs. Lactate	-6.907	-24,02 to 10,21	No	ns	0.9121
87.6809	87.6809	86.7033	0.838562	0.838562	0	11.4805	11.4805	13.869					Glucose vs. Lactate	-3.287	-20,40 to 13,83	No	ns	0.9992
94.8532	94.8532		6.32263	6.32263		0	0
													Atpenine A5
													Complete medium vs. Glucose	0.8237	-15,31 to 16,96	No	ns	> 0,9999
													Complete medium vs. Lactate	2.306	-14,81 to 19,42	No	ns	> 0,9999
													Glucose vs. Lactate	1.482	-15,63 to 18,59	No	ns	> 0,9999
													Antimycine A
													Complete medium vs. Glucose	2.735	-13,40 to 18,87	No	ns	0.9997
													Complete medium vs. Lactate	2.05	-15,06 to 19,16	No	ns	> 0,9999
													Glucose vs. Lactate	-0.6854	-17,80 to 16,43	No	ns	> 0,9999

## Sheet: Fig2i
Log2FoldChange in metabolite abundance
Metabolites	Endometabolome	Significant ? *	Exometabolome	Significant ? *
Lactate	-0.0664457	No	0.0209393	No
Pyruvate	0.529393	No	1.65905	Yes
Citrate	1.40145	Yes
Oxoglutarate	0.628641	Yes
Succinate	0.408994	No
Malate	2.45362	Yes
Alanine	0.871044	Yes	0.824027	Yes
Glutamate	1.74393	Yes	0.46741	No
Glutamine	2.23518	Yes	3.58575	Yes
Aspartate	0.168682	No
Asparagine	0.487079	No	1.16875	Yes
*: see Source data Supp Fig3
