# Supplementary material for: Specific expression of lactate dehydrogenases in glioblastoma controls intercellular lactate transfer to promote tumor growth and invasion
Source: Research Square preprint supplement (doi:10.21203/rs.3.rs-690811/v1), 2021-07-09
Supplement: Supplementary file 16 [file a57a3851df5240de4b709bd8.xlsx]

## Sheet: Fig6b
P3 cell intracellular lactate measurements
Lactate (FmTFP/Fvenus)
	Vehicle		Stiripentol
Time (min)	Mean	SEM	Mean	SEM
0.666667	1.15821	0.030545	1.05032	0.0312273
0.833333	1.15787	0.0308128	1.0515	0.0301337
1	1.15818	0.0308062	1.05561	0.0289616
1.16667	1.15725	0.0313497	1.05663	0.0286971
1.33333	1.1577	0.0307877	1.0575	0.0278292
1.5	1.1574	0.0304469	1.05608	0.0276221
1.66667	1.15775	0.0304414	1.05551	0.0277635
1.83333	1.15718	0.0304776	1.05604	0.0278721
2	1.15759	0.0305438	1.05554	0.0281742
2.16667	1.15765	0.0308411	1.05585	0.028375
2.33333	1.1584	0.0310172	1.05592	0.0285851
2.5	1.15788	0.0306744	1.05541	0.0284671
2.66667	1.15786	0.0306157	1.05567	0.028396
2.83333	1.15745	0.0303159	1.05787	0.0280821
3	1.15708	0.0310772	1.05995	0.0279529
3.16667	1.15649	0.0310558	1.0615	0.0282771
3.33333	1.156	0.0317744	1.05942	0.0286074
3.5	1.15474	0.0312607	1.05917	0.0288228
3.66667	1.1553	0.0312746	1.05691	0.0291139
3.83333	1.15537	0.0307985	1.05548	0.0295807
4	1.15714	0.0307226	1.05431	0.0295394
4.16667	1.15611	0.0306714	1.05418	0.0290417
4.33333	1.15639	0.030859	1.0556	0.0283913
4.5	1.15691	0.0307032	1.05622	0.028203
4.66667	1.15748	0.0305729	1.05583	0.028799
4.83333	1.15693	0.0305282	1.05665	0.0286787
5	1.15535	0.0304837	1.0561	0.0289112
5.16667	1.15497	0.0305518	1.05719	0.028669
5.33333	1.15531	0.0300119	1.05609	0.0282555
5.5	1.156	0.0302597	1.05672	0.0285739
5.66667	1.15729	0.0304204	1.05843	0.0278278
5.83333	1.15799	0.0312389	1.05816	0.0285183
6	1.15879	0.0311546	1.0576	0.0279732
6.16667	1.15787	0.0315606	1.0566	0.0282677
6.33333	1.15638	0.0308421	1.05627	0.0286064
6.5	1.15747	0.0306176	1.05666	0.0285715
6.66667	1.159	0.030688	1.05716	0.0282586
6.83333	1.15894	0.0311432	1.05921	0.0275351
7	1.15732	0.0310884	1.06053	0.0271546
7.16667	1.15702	0.0304481	1.06131	0.0275149
7.33333	1.15899	0.0303288	1.06141	0.0275481
7.5	1.1599	0.0306459	1.06059	0.0276217
7.66667	1.15969	0.0309619	1.05968	0.0275747
7.83333	1.1597	0.0315854	1.05769	0.0279571
8	1.16042	0.0313694	1.05759	0.027984
8.16667	1.15993	0.0311223	1.05547	0.0287245
8.33333	1.15927	0.0308231	1.05245	0.0296646
8.5	1.15154	0.0333108	1.04987	0.0313181
8.66667	1.15025	0.0331709	1.05037	0.0305909
8.83333	1.14644	0.0319545	1.05273	0.0282189
9	1.14907	0.0282243	1.05482	0.0262276
9.16667	1.14541	0.0274709	1.05474	0.0255668
9.33333	1.14323	0.0275095	1.05509	0.0246767
9.5	1.14052	0.0268585	1.05424	0.0239843
9.66667	1.13543	0.026581	1.05405	0.0232576
9.83333	1.1303	0.0258278	1.05208	0.0233142
10	1.12483	0.0255362	1.04974	0.0231676
10.1667	1.12081	0.0244973	1.04771	0.0223502
10.3333	1.11566	0.0233369	1.04652	0.0214957
10.5	1.1109	0.0228578	1.0466	0.0203567
10.6667	1.10528	0.0228577	1.04518	0.0200936
10.8333	1.09977	0.0232762	1.04561	0.0190536
11	1.09257	0.0227869	1.0446	0.0187485
11.1667	1.08654	0.022414	1.04551	0.0175787
11.3333	1.08092	0.0216368	1.04333	0.0167969
11.5	1.07621	0.0207981	1.04214	0.0153016
11.6667	1.07151	0.0200232	1.03873	0.0144935
11.8333	1.06709	0.0195521	1.03611	0.0144615
12	1.06286	0.018812	1.03268	0.014584
12.1667	1.05737	0.0181671	1.02927	0.0143699
12.3333	1.05306	0.0161537	1.02769	0.0145278
12.5	1.0486	0.0150863	1.02597	0.0153005
12.6667	1.04578	0.0137909	1.02451	0.0155238
12.8333	1.04171	0.0131923	1.02191	0.0156419
13	1.03733	0.0119065	1.01967	0.0144934
13.1667	1.03388	0.0105329	1.01928	0.0145643
13.3333	1.03105	0.00969022	1.01836	0.0135196
13.5	1.02966	0.00925516	1.01584	0.0137838
13.6667	1.02843	0.00908304	1.01405	0.0128476
13.8333	1.02542	0.00830627	1.0123	0.0125255
14	1.02138	0.00772808	1.01231	0.0111871
14.1667	1.01778	0.00846921	1.00941	0.0111254
14.3333	1.01547	0.00960793	1.00728	0.0107537
14.5	1.01454	0.00921874	1.00574	0.00979693
14.6667	1.01378	0.00687358	1.006	0.00806002
14.8333	1.01293	0.00657175	1.00428	0.00748435
15	1.01141	0.00560987	1.00307	0.00733556
15.1667	1.00922	0.00449107	1.00282	0.00686995
15.3333	1.00638	0.00324672	1.00327	0.0063876
15.5	1.0039	0.00300432	1.00224	0.00445988
15.6667	1.00207	0.00233052	1.00172	0.0033456
15.8333	1.00211	0.00302284	1.00118	0.00331669
16	1.001	0.00316915	1.00124	0.00207167
16.1667	0.999161	0.00226928	0.998939	0.00282394
16.3333	0.995661	0.00543249	0.996919	0.00401697
16.5	0.998074	0.00730561	0.995813	0.00559497
16.6667	1.00038	0.00591366	0.994895	0.00681306
16.8333	1.00987	0.0053782	0.994577	0.00848851
17	1.01938	0.00881648	0.997512	0.00912509
17.1667	1.03465	0.0127507	1.0012	0.0109665
17.3333	1.04949	0.0160247	1.00722	0.0133465
17.5	1.06514	0.016499	1.00921	0.0155107
17.6667	1.08058	0.0185198	1.01214	0.0172546
17.8333	1.09383	0.019657	1.01472	0.0187536
18	1.10499	0.0207676	1.02017	0.0193403
18.1667	1.11473	0.0222127	1.0251	0.0203455
18.3333	1.12492	0.023687	1.03355	0.0206234
18.5	1.13499	0.0253629	1.04157	0.0213334
18.6667	1.14578	0.0265407	1.05026	0.0215138
18.8333	1.15383	0.0282537	1.05586	0.0220231
19	1.16347	0.0302505	1.05939	0.0233265
19.1667	1.17118	0.032005	1.06322	0.0241363
19.3333	1.18049	0.0328801	1.06555	0.0253507
19.5	1.18795	0.0333247	1.06915	0.0260682
19.6667	1.19272	0.0340851	1.07401	0.0260951
19.8333	1.19723	0.0353236	1.07925	0.0261696
20	1.2012	0.0360965	1.08176	0.0268148
20.1667	1.20639	0.0370784	1.08408	0.0274845
20.3333	1.21065	0.0382031	1.08608	0.0283899
20.5	1.21231	0.0390366	1.08911	0.0282259
20.6667	1.21523	0.0400385	1.09017	0.0292302
20.8333	1.21795	0.0407525	1.0914	0.0293872
21	1.22165	0.0411931	1.0921	0.0298625
21.1667	1.22301	0.0416252	1.09354	0.0300063
21.3333	1.22382	0.0417824	1.0946	0.0302868
21.5	1.22454	0.0428785	1.09719	0.0305832
21.6667	1.22584	0.043572	1.09988	0.0304549
21.8333	1.22644	0.0440489	1.10144	0.0305629
22	1.22557	0.0448113	1.10296	0.0305391
22.1667	1.22552	0.0455946	1.10322	0.031844
22.3333	1.22496	0.0469143	1.10368	0.031637
22.5	1.22779	0.045915	1.10331	0.0321354
22.6667	1.22918	0.045138	1.10278	0.0318801
22.8333	1.2317	0.0448132	1.10422	0.0319474
23	1.23053	0.0452698	1.10356	0.0325375
23.1667	1.23112	0.0457219	1.10458	0.032433
23.3333	1.23164	0.0463785	1.10313	0.0328768
23.5	1.23185	0.0466258	1.1056	0.0321636
23.6667	1.23128	0.0472655	1.10639	0.0326977
23.8333	1.23098	0.0468131	1.10763	0.0323042
24	1.23223	0.0469984	1.10553	0.0327257
24.1667	1.23231	0.0463243	1.10744	0.0320764
24.3333	1.23215	0.0465882	1.10578	0.03224
24.5	1.23144	0.0468565	1.10659	0.0321948
24.6667	1.23225	0.0475018	1.10329	0.0332255
24.8333	1.23201	0.0477932	1.10426	0.0329446
25	1.23439	0.0474846	1.10223	0.0335093
25.1667	1.23536	0.0473657	1.10179	0.0333847
25.3333	1.23678	0.0472443	1.10103	0.0336794
25.5	1.23598	0.0476768	1.10436	0.0330671
25.6667	1.23535	0.0480882	1.10591	0.03292
25.8333	1.2355	0.0479582	1.10749	0.0325495
26	1.2343	0.0474408	1.10603	0.0330829
26.1667	1.23455	0.0469173	1.10445	0.0331123
26.3333	1.23319	0.0471509	1.10439	0.0329843
26.5	1.2354	0.0469515	1.10606	0.0323081
26.6667	1.23468	0.047517	1.10723	0.0329723
26.8333	1.23434	0.0480823	1.10688	0.0329427
27	1.23411	0.0485291	1.10639	0.0326639
27.1667	1.23546	0.048801	1.10613	0.0323487
27.3333	1.23581	0.0493677	1.1063	0.0329323
27.5	1.23531	0.0497932	1.107	0.0327969
27.6667	1.23555	0.0496886	1.1089	0.032755
27.8333	1.23701	0.0499171	1.1101	0.03332
28	1.23787	0.049641	1.1067	0.0339268
28.1667	1.2368	0.049522	1.10517	0.0346866
28.3333	1.23597	0.0492739	1.10347	0.0345775
28.5	1.23473	0.0494534	1.10674	0.0337157
28.6667	1.23436	0.0493663	1.10966	0.0335281
28.8333	1.23493	0.04896	1.11136	0.0334173
29	1.23562	0.048596	1.10971	0.0340502
29.1667	1.23666	0.0489539	1.1069	0.0338063
29.3333	1.23736	0.0491656	1.10655	0.0336671
29.5	1.23688	0.0492703	1.10759	0.0335023
29.6667	1.23747	0.0489509	1.10813	0.0334395
29.8333	1.23604	0.0487727	1.10818	0.033714
30	1.23724	0.0491618	1.10715	0.0339491
30.1667	1.23616	0.0495713	1.10458	0.034524
30.3333	1.23754	0.0497422	1.10304	0.0347816
30.5	1.23672	0.0497983	1.10421	0.0341004
30.6667	1.23652	0.0494839	1.10615	0.0336273
30.8333	1.23616	0.0496362	1.10695	0.033335
31	1.23605	0.0493705	1.10772	0.0335357
31.1667	1.2375	0.0501945	1.10672	0.0335777
31.3333	1.23778	0.0505553	1.10658	0.0337523
31.5	1.2383	0.0513187	1.10529	0.0337601
31.6667	1.23713	0.0508479	1.10629	0.03373
31.8333	1.23664	0.0507655	1.10631	0.0336709
Occupancy
Vehicle	Stiripentol				F test to compare variances			Unpaired t test
0.55905	0.434209				F,DFn, Dfd	1,176, 173, 166		P value	< 0,0001
0.700825	0.375835				P value	0.2938		P value summary	****
0.789302	0.424579				P value summary	ns		Significantly different? (P < 0.05)	Yes
0.714277	0.258663				Significantly different? (P < 0.05)	No		One- or two-tailed P value?	Two-tailed
0.74335	0.22253							t, df	t=15,67 df=339
0.657159	0.759688
0.763086	0.563425
0.8088	0.687386
0.781685	0.387296
0.647954	0.102356
0.825396	0.718178
0.710826	0.334828
0.885659	0.387253
0.704096	0.184071
0.802952	-0.0137132
0.790336	0.314543
0.798925	-0.120536
0.733532	0.139045
0.748089	0.266507
0.714057	-0.239966
0.495021	-0.0202714
0.514217	-0.248402
0.521066	-0.195744
0.43953	-0.219565
0.905224	0.253434
0.859448	0.365096
0.893247	0.370686
0.838265	0.301507
0.881138	-0.0108918
0.873413	0.107722
0.233926	0.250038
0.883146	0.0830111
0.599288	-0.0935934
0.946241	0.446489
0.934296	0.440632
0.955916	0.248331
0.823818	0.194635
0.857842	0.940252
0.886106	0.389576
0.911805	0.439702
1.01192	0.824494
1.00769	0.0969358
0.883363	0.761835
0.968555	0.937489
0.96815	0.0768731
0.90444	0.318585
0.957079	0.239497
0.770342	0.495713
1.01065	0.25805
0.885281	0.256673
0.369335	-0.136111
0.961393	-0.19722
0.774074	-0.167318
0.843245	-0.103398
0.996793	0.351394
0.850443	0.374681
0.706417	0.37305
0.711478	0.364844
0.936533	0.17597
1.03231	0.0189951
0.996005	0.267144
0.778314	0.140679
0.60331	0.485023
0.709783	0.373972
0.553672	0.468629
0.739212	0.291588
0.948208	0.0532014
1.18483	0.492727
1.02974	0.692181
0.984443	0.212371
0.97548	0.449735
0.857602	0.184121
0.981143	0.30544
1.04895	0.430638
0.845901	0.478386
0.400996	0.303978
0.956491	0.173539
0.727427	0.334469
0.981825	0.774733
0.92699	0.804936
1.05093	0.391202
0.763216	0.15433
0.666393	0.627644
0.810309	0.353585
0.96451	0.472587
1.03092	0.083952
0.796157	0.385667
1.01889	0.530156
1.0006	0.0473475
0.57383	0.189504
0.812119	-0.0350494
0.460745	0.156768
0.505849	0.371539
0.365679	0.0878815
0.585166	0.283915
0.442942	0.0577307
0.266178	0.275577
0.378598	0.199993
0.371708	0.234761
0.297418	0.0513831
0.386423	0.193159
0.57362	0.0754655
0.670913	0.355686
0.76896	0.488317
0.660192	-0.0305975
0.777018	0.290635
0.69272	0.0119984
0.769684	-0.0428637
0.739126	-0.110998
0.685862	-0.0865828
0.746522	0.0184825
0.739923	0.014759
0.634374	0.02134
0.710676	0.115552
0.834646	0.04645
0.697442	0.0621554
0.810485	0.0379737
0.857818	0.0715982
0.403334	0.0507718
0.954517	0.0424159
0.691681	0.0547779
0.459579	0.0840246
0.46699	0.333985
0.472198	0.359167
0.41775	0.341427
0.0340148	0.172508
0.575129	0.15177
0.4416	0.495664
0.0490691	0.0394506
-0.147925	0.280517
0.485934	0.0463242
0.643904	0.0166564
0.669411	0.0179166
0.395419	0.14972
0.240769	0.57538
0.218789	0.0885957
0.150042	0.0135532
0.202261	0.5425
0.199233	0.0770194
0.121273	0.0699638
0.212346	-0.00147237
0.235291	-0.0111609
0.633371	0.0556612
0.552577	0.392655
0.389676	0.0615481
0.501073	0.17659
0.850338	0.715761
0.825291	0.546952
0.354052	0.38484
0.186165	0.2117
0.550711	0.10867
0.289464	0.432244
0.57668	0.113231
0.0128254	0.0001982
0.722938	0.314953
0.434029	0.420239
0.844224	0.120648
0.488513	0.109178
0.431171	0.55685
0.540764	0.529901
0.413948	0.192376
0.157319	0.225015
0.64335	0.0835466
0.190512	0.061857
0.478524	0.174343
0.530541	0.182078
0.300361	0.105252
0.441142
0.581848
0.545769
0.58678
0.463582
0.672431
0.509446
Lactate production
Vehicle	Stiripentol				F test to compare variances			Mann Whitney test
0.1042	0.04942				F,DFn, Dfd	2,360, 173, 161		P value	< 0,0001
0.09771	0.0523				P value	< 0,0001		Exact or approximate P value?	Approximate
0.07585	0.05032				P value summary	****		P value summary	****
0.06519	0.0306				Significantly different? (P < 0.05)	Yes		Significantly different? (P < 0.05)	Yes
0.08235	0.02236							One- or two-tailed P value?	Two-tailed
0.09269	0.07294							Sum of ranks in column A,B	39643 , 16974
0.09597	0.06789							Mann-Whitney U	3771
0.07605	0.06187
0.07712	0.04251
0.09683	0.02233
0.0896	0.06561
0.07686	0.04487
0.09645	0.03935
0.08504	0.03968
0.08661	0.005861
0.07486	0.05409
0.08148	0.0327
0.1037	0.04643
0.0907	0.0495
0.07953	0.009099
0.06484	0.01773
0.07803	0.002056
0.06567	0.01851
0.06852	0.01085
0.1293	0.02679
0.1185	0.05394
0.1151	0.04973
0.1033	0.04716
0.1136	0.02832
0.08797	0.03668
0.0243	0.05048
0.1183	0.06986
0.07966	0.05084
0.09	0.005922
0.1191	0.04039
0.09549	0.02506
0.1186	0.02315
0.08924	0.06981
0.1084	0.05476
0.1023	0.04165
0.1051	0.0836
0.0898	0.01727
0.1268	0.07718
0.08721	0.06756
0.1145	0.01181
0.07497	0.03811
0.08997	0.03097
0.06221	0.06099
0.07433	0.0267
0.07816	0.0438
0.0411	0.02359
0.08144	0.00515
0.06987	0.007497
0.103	0.009533
0.1183	0.02423
0.08404	0.03703
0.07504	0.04862
0.0727	0.01998
0.08757	0.01079
0.09241	0.002936
0.1095	0.01399
0.06768	0.02023
0.02469	0.04488
0.07004	0.04747
0.05796	0.0388
0.06407	0.03775
0.07635	0.01478
0.103	0.06346
0.1042	0.05809
0.103	0.03373
0.1004	0.04085
0.1086	0.02828
0.1108	0.03745
0.103	0.05379
0.09728	0.03892
0.0438	0.03479
0.06168	0.02677
0.05978	0.05894
0.08441	0.05669
0.09665	0.07441
0.1084	0.03127
0.08654	0.01796
0.06649	0.07578
0.08243	0.04931
0.0965	0.04676
0.08238	0.05389
0.08007	0.03599
0.08356	0.03789
0.07863	0.01502
0.04893	0.02159
0.08806	0.04179
0.04237	0.03097
0.06386	0.05453
0.05066	0.03076
0.07111	0.04256
0.06319	0.05194
0.03444	0.03424
0.04701	0.03735
0.02271	0.04606
0.03555	0.02647
0.05157	0.04979
0.05463	0.04059
0.06095	0.01387
0.07257	0.02812
0.07195	0.01399
0.07124	0.01732
0.08181	0.0161
0.08568	0.004514
0.08065	0.0296
0.05647	0.02065
0.07109	0.01962
0.08174	0.03245
0.06311	0.03022
0.08799	0.02685
0.09524	0.02867
0.08081	0.03177
0.08705	0.03129
0.08894	0.0305
0.04845	0.003666
0.07724	0.03721
0.06846	0.03814
0.05958	0.0504
0.0583	0.03662
0.06099	0.03384
0.05422	0.02686
0.03937	0.05729
0.06172	0.01896
0.05878	0.03406
0.02689	0.01898
0.01613	0.0137
0.05383	0.005859
0.06595	0.02478
0.06356	0.04968
0.04464	0.03007
0.01434	0.03141
0.03967	0.05562
0.02839	0.02898
0.02876	0.04229
0.02999	0.02801
0.02464	0.02439
0.01658	0.02878
0.02325	0.04557
0.06361	0.03684
0.06149	0.03139
0.04401	0.05665
0.05978	0.04265
0.07897	0.05003
0.08746	0.03196
0.02194	0.02098
0.03252	0.04186
0.05081	0.02971
0.04007	0.01504
0.07901	0.03811
0.01728	0.03846
0.0709	0.02299
0.04021	0.03821
0.07494	0.03279
0.04363	0.02887
0.04626	0.0323
0.05322	0.02834
0.03995	0.0217
0.01376	0.02089
0.07429
0.007096
0.06002
0.05338
0.03959
0.04716
0.06485
0.05601
0.06599
0.05647
0.07091
0.06718

## Sheet: Fig6c
Oxygraphy on treated P3 cells
Respiration JO2 (nmol/min/mg of protein)
Basal		Non phos		Uncoupled			Two-way ANOVA	Ordinary		Sidak's multiple comparisons test	Mean Diff,	95% CI of diff,	Significant?	Summary	Adjusted P Value
Vehicle	Stiripentol	Vehicle	Stiripentol	Vehicle	Stiripentol		Alpha	0.05
10.8206	8.28265	4.27743	4.73151	13.4825	12.1265					Vehicle - Stiripentol
10.8598	3.24274	2.12562	2.91056	12.2352	2.72331					Basal	6.402	1,177 to 11,63	Yes	*	0.0131
15.3406	8.42209	5.74748	7.15887	20.7618	13.5558					Non Phos	-0.02956	-5,255 to 5,196	No	ns	> 0,9999
14.8621	4.76851	4.35068	2.90066	20.4113	4.82031					Uncoupled	7.773	2,547 to 13,00	Yes	**	0.0025
7.86986	3.02641	3.12053	2.06791	12.9667	7.76755
Inhibitor sensibility (% of JO2 Uncoupled)
Rotenone		Atpenin A5		Antimycin A			Two-way ANOVA	Ordinary		Sidak's multiple comparisons test	Mean Diff,	95% CI of diff,	Significant?	Summary	Adjusted P Value
Vehicle	Stiripentol	Vehicle	Stiripentol	Vehicle	Stiripentol		Alpha	0.05
76.0266	29.9529	5.68462	44.1992	27.2888	25.848					Vehicle - Stiripentol
74.8477	68.7017	0	15.8249	28.7439	11.2352					Rotenone	21.57	2,281 to 40,86	Yes	*	0.0253
83.7176	77.2382	0	15.7023	16.4143	7.05947					Atpenine A5	-23.8	-43,09 to -4,513	Yes	*	0.0127
87.6809	68.9662	0.838562	14.0849	11.4805	6.94886					Antimycine A	8.209	-13,36 to 29,78	No	ns	0.7074
94.8532	64.4141	6.32263	42.0473

## Sheet: Fig5d
Spheroid growth of treated P3 cells
Vehicle				Stiripentol					F test to compare variances (72h)			Unpaired t test
0h	24h	48h	72h	0h	24h	48h	72h		F,DFn, Dfd	1,789, 23, 23		P value	< 0,0001
0	8.346	17.798	17.727	0	6.444	7.574	13.17		P value	0.1706		P value summary	****
0	11.282	16.892	22.207	0	4.539	7.262	13.669		P value summary	ns		Significantly different? (P < 0.05)	Yes
0	-0.187	9.376	25.97	0	4.092	8.836	10.333		Significantly different? (P < 0.05)	No		One- or two-tailed P value?	Two-tailed
0	3.912	7.438	26.106	0	2.678	5.173	5.959					t, df	t=7,402 df=46
0	6.689	13.913	25.443	0	7.342	11.88	16.298
0	4.784	15.204	17.517	0	2.816	9.354	14.988
0	7.882	15.047	25.617	0	4.954	8.556	11.548
0	5.581	16.013	23.158	0	3.734	6.059	7.225
0	9.43	19.037	25.481	0	-4.968	1.248	2.215
0	12.65	29.059	34.318	0	11.355	16.543	19.579
0	16.679	27.669	39.062	0	15.135	13	20.664
0	16.141	28.165	38.278	0	15.515	17.785	20.019
0	10.284	20.846	26.534	0	12.08	12.678	18.789
0	13.31	23.925	25.991	0	10.115	13.526	17.567
0	11.913	23.323	23.45	0	7.961	10.549	16.962
0	16.687	24.433	36.94	0	9.592	4.962	13.38
0	13.818	15.454	22.879	0	12.383	14.28	21.108
0	17.565	25.662	38.995	0	11.766	14.733	19.842
0	11.313	25.634	38.572	0	12.973	16.236	19.646
0	14.217	23.413	31.341	0	5.84	15.698	22.865
0	13.443	22.724	32.073	0	11.473	5.499	16.793
0	16.148	25.52	37.182	0	7.463	14.459	17.809
0	13.773	15.716	21.209	0	6.606	7.815	14.302
0	13.871	17.892	27.149	0	8.287	12.597	17.345

## Sheet: Fig5e
Spheroid invasion of treated P3 cells
Vehicle	Stiripentol		F test to compare variances			Unpaired t test
1.19703	0.654743		F,DFn, Dfd	1,383, 23, 23		P value	< 0,0001
0.8598	0.661042		P value	0.443		P value summary	****
1.0095	0.613546		P value summary	ns		Significantly different? (P < 0.05)	Yes
1.04655	0.450537		Significantly different? (P < 0.05)	No		One- or two-tailed P value?	Two-tailed
0.961181	0.605169					t, df	t=18,72 df=46
0.954216	0.62446
0.976175	0.602228
0.99555	0.639667
1.08162	0.498955
0.90901	0.565212
1.13825	0.492444
1.02487	0.505284
0.854454	0.47382
1.0795	0.49393
0.83566	0.5143
1.07663	0.536767
1.08825	0.408487
1.07401	0.425847
0.832198	0.466658
1.01155	0.37885
1.03363	0.449318
1.00632	0.482006
1.0334	0.467765
0.920643	0.48438

## Sheet: Fig5f
Mice survival
Days elapsed	Vehicle	Bevacizumab	Stiripentol	Combo		Vehicle vs Bevacizumab		Log-rank (Mantel-Cox) test			Gehan-Breslow-Wilcoxon test			Hazard Ratio (logrank)
67	1							Chi square	15.12		Chi square	13.49		Ratio (and its reciprocal)	4.484	0.223
70			1					df	1		df	1		95% CI of ratio	7,048 to 109,0	0,009176 to 0,1419
71	1							P value	0.0001		P value	0.0002
72			1					P value summary	***		P value summary	***
72			1					Are the survival curves sig different?	Yes		Are the survival curves sig different?	Yes
73	1
73	1					Vehicle vs Stiripentol		Log-rank (Mantel-Cox) test			Gehan-Breslow-Wilcoxon test			Hazard Ratio (logrank)
73	1							Chi square	3.558		Chi square	2.024		Ratio (and its reciprocal)	2.205	0.4535
76	1							df	1		df	1		95% CI of ratio	1,194 to 11,26	0,08880 to 0,8377
76	1							P value	0.0593		P value	0.1549
77			1					P value summary	ns		P value summary	ns
77			1					Are the survival curves sig different?	No		Are the survival curves sig different?	No
77			1
78			1			Vehicle vs Combo		Log-rank (Mantel-Cox) test			Gehan-Breslow-Wilcoxon test			Hazard Ratio (Mantel-Haenszel)
81		1						Chi square	16.72		Chi square	15.06		Ratio (and its reciprocal)	34.35	0.02911
85				1				df	1		df	1		95% CI of ratio	6,306 to 187,2	0,005343 to 0,1586
84		1						P value	< 0,0001		P value	0.0001
85		1						P value summary	****		P value summary	***
85		1						Are the survival curves sig different?	Yes		Are the survival curves sig different?	Yes
85		1
85		1				Bevacizumab vs Combo		Log-rank (Mantel-Cox) test			Gehan-Breslow-Wilcoxon test			Hazard Ratio (logrank)
85			1					Chi square	4.29		Chi square	4.953		Ratio (and its reciprocal)	2.306	0.4336
86				1				df	1		df	1		95% CI of ratio	1,285 to 10,72	0,09325 to 0,7781
86				1				P value	0.0383		P value	0.026
86				1				P value summary	*		P value summary	*
87				1				Are the survival curves sig different?	Yes		Are the survival curves sig different?	Yes
87				1
88		1
89		1
91				1
91				1
93				1

## Sheet: Fig5g
In vivo P3 treatments
Core
Vehicle	Bevacizumab	Stiripentol	Combo		Brown-Forsythe test			ANOVA summary			Dunnett's multiple comparisons test	Mean Diff,	95% CI of diff,	Significant?	Summary	Adjusted P Value
35.7745	20.7874	28.317	18.6335		F (DFn, DFd)	0,5483 (3, 28)		F	19.33
32.762	24.4297	32.5916	25.793		P value	0.6534		P value	< 0,0001		Vehicle vs. Bevacizumab	11.82	6,781 to 16,85	Yes	****	< 0,0001
27.1583	20.1253	33.8008	19.1618		P value summary	ns		P value summary	****		Vehicle vs. Stiripentol	3.323	-1,711 to 8,358	No	ns	0.2585
27.3963	21.5186	32.7447	18.6978		Significantly different standard deviations? (P < 0.05)	No		Are differences among means statistically significant? (P < 0.05)	Yes		Vehicle vs. Combo	12.79	7,754 to 17,82	Yes	****	< 0,0001
33.6963	22.4266	31.6643	18.886					R square	0.6744
43.2743	25.3887	33.6441	24.6489
35.6358	20.6554	32.602	22.4964
34.5298	20.368	18.2754	19.5969
Invasion
Vehicle	Bevacizumab	Stiripentol	Combo		Brown-Forsythe test			ANOVA summary			Dunnett's multiple comparisons test	Mean Diff,	95% CI of diff,	Significant?	Summary	Adjusted P Value
14.2305	14.3811	11.0419	6.9719		F (DFn, DFd)	1,109 (3, 28)		F	20.47
11.9523	13.0937	9.72646	10.065		P value	0.362		P value	< 0,0001		Vehicle vs. Bevacizumab	-1.1	-3,027 to 0,8263	No	ns	0.3667
10.4078	11.9762	8.28267	6.92013		P value summary	ns		P value summary	****		Vehicle vs. Stiripentol	2.64	0,7132 to 4,566	Yes	**	0.0056
8.76947	14.2796	8.6496	6.06041		Significantly different standard deviations? (P < 0.05)	No		Are differences among means statistically significant? (P < 0.05)	Yes		Vehicle vs. Combo	4.359	2,432 to 6,286	Yes	****	< 0,0001
11.3464	11.2944	10.1967	6.68894					R square	0.6868
14.0631	12.6475	8.74084	8.9984
13.0155	12.9989	9.04486	6.44236
9.42523	11.3414	6.40843	6.19144
